# Supplementary material for: Global, regional, and national mortality trends in youth aged 15–24 years between 1990 and 2019: a systematic analysis
Source: PubMed Central journal article supplement (PMC7966666; doi:10.1016/s2214-109x(21)00023-1), 2021-03-01
Supplement: mmc1.pdf [file mmc1.pdf]

# THE LANCET

## Global Health

### Supplementary appendix

This appendix formed part of the original submission and has been peer reviewed. We post it as supplied by the authors.

Supplement to: Masquelier B, Hug L, Sharrow D, et al. Global, regional, and national mortality trends in youth aged 15–24 years between 1990 and 2019: a systematic analysis. *Lancet Glob Health* 2021; published online March 1. [http://dx.doi.org/10.1016/S2214-109X\(21\)00023-1](http://dx.doi.org/10.1016/S2214-109X(21)00023-1).

## Appendix

Global, regional, and national mortality trends in youth (15-24 years) from 1990 to 2019: an analysis of empirical data

---

### CONTENTS

|                                                                                                                                      |            |
|--------------------------------------------------------------------------------------------------------------------------------------|------------|
| <b>1 Database</b>                                                                                                                    | <b>2</b>   |
| 1.1 Vital registration data . . . . .                                                                                                | 2          |
| 1.1.1 Data availability . . . . .                                                                                                    | 2          |
| 1.1.2 Estimation of completeness . . . . .                                                                                           | 2          |
| 1.1.3 Calculation of mortality rates . . . . .                                                                                       | 8          |
| 1.2 Sibling survival histories . . . . .                                                                                             | 9          |
| 1.2.1 Calculation of mortality rates . . . . .                                                                                       | 9          |
| 1.2.2 Data exclusion and estimation of recall bias . . . . .                                                                         | 10         |
| 1.3 Recent household deaths in censuses and surveys . . . . .                                                                        | 13         |
| <b>2 Estimation model</b>                                                                                                            | <b>13</b>  |
| 2.1 Statistical model . . . . .                                                                                                      | 13         |
| 2.2 Bayesian penalized splines regression . . . . .                                                                                  | 13         |
| 2.3 Data model . . . . .                                                                                                             | 14         |
| 2.4 Extrapolations . . . . .                                                                                                         | 16         |
| 2.5 Computation . . . . .                                                                                                            | 16         |
| 2.6 Adjustments for crisis-related mortality . . . . .                                                                               | 18         |
| 2.7 Model validation . . . . .                                                                                                       | 21         |
| 2.8 Deriving estimates for countries with insufficient data . . . . .                                                                | 25         |
| 2.9 Calculation of the annual rate of reduction . . . . .                                                                            | 27         |
| <b>3 List of data series</b>                                                                                                         | <b>27</b>  |
| <b>4 Mortality levels and numbers of deaths in 1990 and 2019</b>                                                                     | <b>43</b>  |
| <b>5 Country-specific trends in the probability <math>_{10}q_{15}</math></b>                                                         | <b>63</b>  |
| <b>6 Comparison with estimates from model life tables, the World Population Prospects 2019 and the Global Burden of Disease 2019</b> | <b>161</b> |
| <b>7 UNICEF regional classification</b>                                                                                              | <b>164</b> |
| <b>8 United Nations Inter-Agency Group for Child Mortality Estimation</b>                                                            | <b>165</b> |

---

## 1 DATABASE

Data sources for the mortality rates were nationwide vital registration and sample registration systems, nationally representative sibling histories from surveys, and recent household deaths reported in censuses. Mortality rates were recalculated from the survey microdata when available or based on published tabulations.

### 1.1 VITAL REGISTRATION DATA

#### 1.1.1 DATA AVAILABILITY

Vital registration data were extracted from the WHO mortality database<sup>1</sup>. For 138 countries, death registration data were available for at least one year since 1990<sup>2</sup>. Mortality rates for the period before 1989 were not included in the statistical model as our focus is on trends in the period 1990-2019.

#### 1.1.2 ESTIMATION OF COMPLETENESS

We assumed that death registration was complete in 38 countries included in the Human Mortality Database (HMD). For the other countries, we evaluated the completeness based on “death distribution methods” (DDMs). These methods compare the age distribution of deaths in the VR with the age distribution of the population enumerated in censuses to estimate the fraction of deaths that are reported. Each method has a standard version that applies to one census only but assumes a stable population. The methods have subsequently been revised for use in non-stable populations [1]. Three methods are applicable when two censuses are available, and deaths have been recorded in the intercensal period: the generalized growth balance method (GGB) [2], the synthetic extinct generation method (SEG) [3], and a combination of the two, called the hybrid method (or GGB>SEG). We employed here the GGB>SEG approach, which has been shown to perform better than the GGB and SEG methods used separately [4].

All the DDMs make strong assumptions, that under-reporting of deaths is constant by age (over a certain age limit), that age reporting is accurate, and that the population is closed to migration (unless net migration rates are available by age and sex). To reduce the sensitivity of estimates to violations of these assumptions, demographers usually select an age interval to calculate completeness, eliminating the youngest and oldest age groups to avoid introducing errors due to small numbers of deaths, age misreporting or net migration. Based on simulations, Murray et al. (2010) recommend using the age group 40-70 for the GGB, 55-80 for the SEG, 50-70 for the GGB>SEG [5]. Measuring completeness from adults over the age of 40 (or 50 or 55) reduces potential biases introduced by migration, which is often more frequent in young adults. However, estimates based on older ages are

---

<sup>1</sup>[https://www.who.int/healthinfo/mortality\\_data/en/](https://www.who.int/healthinfo/mortality_data/en/)

<sup>2</sup>The WHO Mortality Database also contains some estimates from recent household deaths in censuses or intercensal surveys, but these were not treated as vital registration data and are not considered in this count.

more likely to be affected by age reporting errors. In another study, Hill and colleagues (2009) suggested using the age groups 5+ to 65+ for fitting purposes [4]. The selection of age groups remains an area requiring further research. Depending on the frequency of age errors and the extent of migration, various age groups should probably be selected for different methods and/or applications. In this study, the age range was selected based on visual inspection of the diagnostic plots. For example, in the case of the GGB method, it is usually recommended to plot  $b(x+)$ , the partial birth rate, against  $d(x+)$ , the partial death rate, for each age  $x$ . A regression line is fitted on these points, and the analyst examines the fit and residuals to select the points that provide the best fit [1]. The DDM package of R [6] replicates this manual approach by retaining the points that minimize the square of the average squared residual. We inspected all diagnostic plots, and in most cases, retained the age range that had been selected by the DDM package. In a few countries with substantial migration, or when completeness estimates were highly sensitive to the selection of age groups, we preferred to opt for older age groups, often selecting the age range 50-70 as recommended by Murray et al. (2010).

Completeness was estimated for each country for periods between pairs of recent censuses for which an age distribution of the population was available in the Demographic Yearbook<sup>3</sup>. When the estimated completeness was less than 80%, mortality rates derived from vital registration data were excluded from the model fit. When completeness was greater than or equal to 95%, the registration was considered complete, and mortality rates were not adjusted upwards. If completeness was between 80 and 95%, we multiplied the inverse of the completeness rate by the number of deaths to obtain adjusted estimates.

We did not introduce any smoothing of completeness levels, and changed the level from one intercensal period to the next. Mortality trends are smoothed in a second step using the B3 model (see below). After the last census, it is not possible to estimate completeness with death distribution methods, so completeness levels were kept constant until 2019.

Table S1 below presents the intercensal periods considered, the completeness estimates obtained with the GGB>SEG method and the age groups considered for the fit. In 103 countries, vital registration data could be used for at least one year after 2010. This number is slightly larger than that for under-five mortality (94 countries). The completeness of death registration could be lower among children, due to common under-reporting of neonatal deaths [7]. Countries with at least one usable vital registration data point after 2010 represented 29% of the global population of adolescents and young people, but only 20% of deaths in this age group.

Our estimates of completeness are compared in Table S1 with those of two other sources:

- First, as part of the *Global Burden of Disease* Study, the Institute for Health Metrics and Evaluation (IHME) regularly estimates the completeness of death registration also based on DDMs. The GBD 2017 study combined estimates derived from the GGB, SEG and GGB>SEG methods in a statistical model predicting completeness

---

<sup>3</sup><https://unstats.un.org/unsd/demographic-social/products/dyb/dybcensusdata.cshtml>

in adults from that of the registration of under-five deaths<sup>4</sup>. Estimates were smoothed in time, as well as in space, and some information on completeness was also borrowed from neighbouring countries [8]. Completeness of the registration of under-five deaths was calculated from the ratio of the observed mortality rate from the vital registration to the final GBD estimate of child mortality. This method introduces a dependence on child mortality estimates and completeness of registration in children that we wish to avoid here. To our knowledge, the interrelationships between the completeness of child and adult registration have not been well studied. In some countries, under-registration of child deaths could occur, for example, because of difficulties in registering neonatal deaths, whereas registration of adults could be more systematic. For example, formerly Soviet Republics used a definition of live birth that excluded a substantial proportion of early neonatal deaths [9], and this will affect the completeness of child registration, but not that of deaths among older children and adults. We also wish to avoid borrowing information from neighbouring countries, as situations can vary widely within regions. For instance, according to GBD 2017 estimates, the completeness of the registration of adult deaths in Honduras is only 28%, while registration is considered complete in Guatemala and Nicaragua<sup>5</sup>.

- The second set of completeness estimates comes from the United Nations Statistics Division (UNSD). The UNSD provides a recent estimate for most countries<sup>6</sup>, but no trend over time and a variety of sources are involved (including workshops with national representatives, reports from National Statistical Offices and estimates from the World Health Organization).

In most countries, our estimates based solely on the GGB>SEG method are consistent the GBD estimates (derived from more involved modelling) (Figure S1). The mean absolute percentage error (MAPE) between our estimates and the GBD 2017 estimates is 5.4% and the concordance correlation coefficient is 0.79 (0.71-0.84) [10]. Comparison with UNSD estimates is more difficult because the UNSD values refer only to the most recent estimate available for each country, and for many countries, coverage is estimated in a range rather than a precise value. Several cases deserve further attention as estimates based on death distribution methods are quite higher than those provided by UNSD (e.g. Colombia, Guyana, Jordan, Trinidad and Tobago, Tunisia).

---

<sup>4</sup>At the time we analyzed the completeness of death registration, the GBD 2019 Study was not available. More recent completeness estimates from the GBD are now available at <https://vizhub.healthdata.org/mortality/completeness>.

<sup>5</sup>GBD estimates of completeness were retrieved from <https://vizhub.healthdata.org/mortality/completeness>, accessed July 2020, 25

<sup>6</sup><https://unstats.un.org/unsd/demographic-social/crvs/>, accessed July 2020, 25

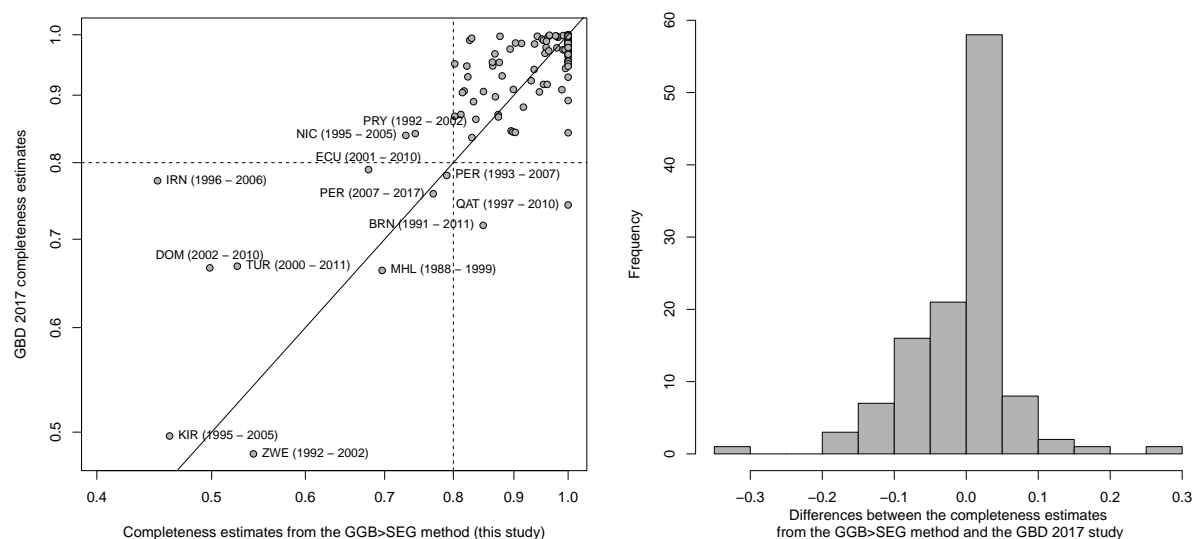

Figure S1 – *Concordance between the GBD 2017 estimates of completeness and estimates obtained from the GGB>SEG method in this study*

| Country             | First census | Second census | Age group | GGB>SEG | GBD 2017 | UNSD                    |
|---------------------|--------------|---------------|-----------|---------|----------|-------------------------|
| Albania             | 1989         | 2001          | 35-70     | 1.00    | 0.96     | 75-89% (2016)           |
| Albania             | 2001         | 2011          | 40-75     | 1.00    | 0.89     | 75-89% (2016)           |
| Algeria             | 1998         | 2008          | 5-75      | 1.00    | 0.97     | less than 90% (2001)    |
| Antigua and Barbuda | 2001         | 2011          | 15-75     | 1.00    | 0.95     | 90% or more (2000)      |
| Argentina           | 1991         | 2001          | 15-50     | 1.00    | 1.00     | 90% or more (2008)      |
| Argentina           | 2001         | 2010          | 15-55     | 0.98    | 1.00     | 90% or more (2008)      |
| Armenia             | 1989         | 2001          | 40-75     | 1.00    | 0.96     | 0.971 (2011)            |
| Armenia             | 2001         | 2011          | 40-75     | 1.00    | 1.00     | 0.971 (2011)            |
| Azerbaijan          | 1989         | 1999          | 50-70     | 0.82    | 0.91     | 90% or more (2001)      |
| Azerbaijan          | 1999         | 2009          | 20-55     | 0.90    | 0.85     | 90% or more (2001)      |
| Bahamas             | 1990         | 2000          | 5-65      | 0.81    | 0.90     | 90% or more (2003)      |
| Bahamas             | 2000         | 2010          | 50-70     | 0.85    | 0.91     | 90% or more (2003)      |
| Bahrain             | 1991         | 2001          | 10-65     | 0.81    | 0.87     | 90% or more (2015)      |
| Bahrain             | 2001         | 2010          | 35-75     | 0.88    | 0.93     | 90% or more (2015)      |
| Barbados            | 2000         | 2010          | 40-75     | 0.98    | 0.98     | 100% (2007)             |
| Belize              | 1991         | 2000          | 25-60     | 0.94    | 0.94     | 100% (2008)             |
| Belize              | 2000         | 2010          | 25-60     | 1.00    | 0.97     | 100% (2008)             |
| Brazil              | 1991         | 2000          | 20-65     | 0.96    | 0.98     | 90-99% (2017)           |
| Brazil              | 2000         | 2010          | 20-60     | 0.94    | 1.00     | 90-99% (2017)           |
| Brunei Darussalam   | 1991         | 2011          | 5-65      | 0.85    | 0.72     | 100% (2017)             |
| Cabo Verde          | 1990         | 2000          | 5-65      | 1.00    | 0.97     | 75% or more (2010-2015) |
| Cabo Verde          | 2000         | 2010          | 5-65      | 1.00    | 0.97     | 75% or more (2010-2015) |
| Colombia            | 1993         | 2005          | 5-65      | 0.99    | 1.00     | 0.729 (2000)            |
| Cook Islands        | 1996         | 2006          | 20-55     | 1.00    |          | 82.0% (2012)            |
| Costa Rica          | 1984         | 2000          | 10-65     | 0.95    | 0.99     | 0.97 (2016)             |
| Costa Rica          | 2000         | 2011          | 10-65     | 1.00    | 0.99     | 0.97 (2016)             |
| Cuba                | 1981         | 2002          | 30-70     | 0.99    | 0.97     | 100% (2017)             |

| Country                    | First census | Second census | Age group | GGB>SEG | GBD 2017 | UNSD               |
|----------------------------|--------------|---------------|-----------|---------|----------|--------------------|
| Cuba                       | 2002         | 2012          | 25-60     | 1.00    | 0.98     | 100% (2017)        |
| Cyprus                     | 1992         | 2001          | 15-55     | 0.95    | 0.92     | 90% or more (2014) |
| Cyprus                     | 2001         | 2011          | 40-75     | 0.90    | 0.84     | 90% or more (2014) |
| Dominica                   | 1991         | 2001          | 25-60     | 1.00    | 1.00     | 90% or more (2000) |
| Dominica                   | 2001         | 2011          | 40-75     | 1.00    | 1.00     | 90% or more (2000) |
| Dominican Republic         | 2002         | 2010          | 15-50     | 0.50    | 0.67     | 50-74% (2016)      |
| Ecuador                    | 1990         | 2001          | 30-65     | 1.00    | 1.00     | 70-79% (2017)      |
| Ecuador                    | 2001         | 2010          | 15-50     | 0.68    | 0.79     | 70-79% (2017)      |
| Egypt                      | 1996         | 2006          | 20-55     | 1.00    | 1.00     | 0.96 (2016)        |
| Egypt                      | 2006         | 2017          | 20-65     | 1.00    | 1.00     | 0.96 (2016)        |
| El Salvador                | 1992         | 2007          | 35-75     | 0.96    | 0.92     | 80-89% (2017)      |
| Fiji                       | 2007         | 2017          | 20-55     | 1.00    | 0.97     | 100% (2010)        |
| Georgia                    | 1989         | 2002          | 5-55      | 0.87    | 0.90     | 90% or more (2000) |
| Georgia                    | 2002         | 2014          | 20-65     | 1.00    | 0.98     | 90% or more (2000) |
| Grenada                    | 1981         | 2001          | 30-65     | 0.83    | 0.99     | 100% (2009)        |
| Grenada                    | 2001         | 2011          | 35-65     | 0.98    | 1.00     | 100% (2009)        |
| Guatemala                  | 1981         | 2018          | 30-65     | 1.00    | 0.99     | 0.9 (2006)         |
| Guyana                     | 1991         | 2002          | 20-70     | 1.00    | 0.97     | 0.73 (2008)        |
| Guyana                     | 2002         | 2012          | 35-70     | 1.00    | 0.96     | 0.73 (2008)        |
| Iran (Islamic Republic of) | 1996         | 2006          | 15-50     | 0.45    | 0.78     | 0.92 (2015)        |
| Iran (Islamic Republic of) | 2006         | 2011          | 30-65     | 0.83    | 0.84     | 0.92 (2015)        |
| Jamaica                    | 1991         | 2001          | 45-70     | 0.86    | 0.95     | 75-89% (2008)      |
| Jamaica                    | 2001         | 2011          | 35-70     | 0.99    | 0.97     | 75-89% (2008)      |
| Jordan                     | 2004         | 2015          | 25-65     | 0.83    | 0.89     | 0.65 (2017)        |
| Kazakhstan                 | 1999         | 2009          | 40-75     | 1.00    | 0.95     | 90% or more (2001) |
| Kiribati                   | 1995         | 2005          | 15-50     | 0.46    | 0.50     | 76.0% (2002)       |
| Kuwait                     | 1995         | 2005          | 35-60     | 1.00    | 1.00     | 90% or more (2001) |
| Kyrgyzstan                 | 1989         | 1999          | 5-75      | 0.95    | 0.91     | 90-99% (2017)      |
| Kyrgyzstan                 | 1999         | 2009          | 5-75      | 1.00    | 0.94     | 90-99% (2017)      |
| Malaysia                   | 1991         | 2000          | 50-70     | 1.00    | 0.99     | 90-99% (2017)      |
| Malaysia                   | 2000         | 2010          | 15-55     | 1.00    | 1.00     | 90-99% (2017)      |
| Maldives                   | 1985         | 1995          | 25-60     | 1.00    | 0.97     | 100% (2014)        |
| Maldives                   | 1995         | 2006          | 20-65     | 0.95    | 0.99     | 100% (2014)        |
| Malta                      | 1995         | 2005          | 15-50     | 0.96    | 0.97     | 90% or more (2016) |
| Marshall Islands           | 1988         | 1999          | 15-50     | 0.70    | 0.66     | 90% or more (2001) |
| Mauritius                  | 1990         | 2000          | 30-65     | 1.00    | 0.98     | 90% or more (2013) |
| Mauritius                  | 2000         | 2011          | 40-75     | 1.00    | 0.99     | 90% or more (2013) |
| Mexico                     | 1990         | 2000          | 30-65     | 1.00    | 0.99     | 90-99% (2017)      |
| Mexico                     | 2000         | 2010          | 30-70     | 1.00    | 0.99     | 90-99% (2017)      |
| Mongolia                   | 1989         | 2000          | 20-65     | 0.80    | 0.87     | 90-99% (2017)      |
| Mongolia                   | 2000         | 2010          | 35-70     | 0.90    | 0.91     | 90-99% (2017)      |
| Montenegro                 | 1991         | 2003          | 25-60     | 1.00    | 0.95     | 90% or more (2006) |
| Montenegro                 | 2003         | 2011          | 15-60     | 1.00    | 0.95     | 90% or more (2006) |
| Morocco                    | 1994         | 2004          | 15-50     | 0.40    |          | 0.6236 (2007)      |
| Nicaragua                  | 1995         | 2005          | 50-70     | 0.73    | 0.84     | 0.699 (2009)       |
| North Macedonia            | 1991         | 2002          | 5-60      | 0.96    | 0.97     | 90% or more (2016) |
| Panama                     | 1990         | 2000          | 15-55     | 0.87    | 0.97     | 0.937 (2014)       |
| Panama                     | 2000         | 2010          | 25-60     | 0.89    | 0.98     | 0.937 (2014)       |
| Paraguay                   | 1992         | 2002          | 15-50     | 0.74    | 0.84     | 0.65 (2013)        |
| Peru                       | 1993         | 2007          | 5-75      | 0.79    | 0.78     | 50-74% (2015)      |
| Peru                       | 2007         | 2017          | 5-65      | 0.77    | 0.76     | 50-74% (2015)      |

| Country                            | First census | Second census | Age group | GGB>SEG | GBD 2017 | UNSD               |
|------------------------------------|--------------|---------------|-----------|---------|----------|--------------------|
| Philippines                        | 1990         | 2000          | 5-70      | 1.00    | 0.93     | 0.876 (2015)       |
| Philippines                        | 2000         | 2015          | 15-60     | 0.99    | 0.91     | 0.876 (2015)       |
| Qatar                              | 1997         | 2010          | 50-65     | 1.00    | 0.74     | 1 (2017)           |
| Republic of Korea                  | 1985         | 1995          | 15-50     | 0.83    | 0.99     | 100% (2017)        |
| Republic of Korea                  | 1995         | 2005          | 15-50     | 1.00    | 0.98     | 100% (2017)        |
| Republic of Korea                  | 2005         | 2015          | 15-50     | 0.82    | 0.95     | 100% (2017)        |
| Republic of Moldova                | 1989         | 2004          | 15-55     | 1.00    | 0.99     | 90% or more (2010) |
| Republic of Moldova                | 2004         | 2014          | 40-75     | 1.00    | 0.99     | 90% or more (2010) |
| Romania                            | 1992         | 2002          | 30-65     | 1.00    | 0.99     | 90% or more (2016) |
| Romania                            | 2002         | 2011          | 40-75     | 1.00    | 0.99     | 90% or more (2016) |
| Saint Kitts and Nevis              | 1991         | 2001          | 35-70     | 1.00    |          | 0.82 (2009)        |
| Saint Lucia                        | 1991         | 2001          | 35-70     | 1.00    | 0.99     | 0.92 (2010)        |
| Saint Vincent and the Grenadines   | 1991         | 2001          | 40-75     | 1.00    | 1.00     | 90% or more (2014) |
| Saint Vincent and the Grenadines   | 2001         | 2012          | 35-70     | 1.00    | 1.00     | 90% or more (2014) |
| Serbia                             | 1991         | 2002          | 30-65     | 1.00    | 1.00     | 90% or more (2016) |
| Serbia                             | 2002         | 2011          | 25-70     | 1.00    | 1.00     | 90% or more (2016) |
| Seychelles                         | 1994         | 2002          | 15-60     | 0.96    | 1.00     | 90% or more (2012) |
| Seychelles                         | 2002         | 2010          | 15-55     | 0.98    | 1.00     | 90% or more (2012) |
| Singapore                          | 1990         | 2000          | 25-70     | 0.80    | 0.95     | 90% or more (2012) |
| Singapore                          | 2000         | 2010          | 35-70     | 0.87    | 0.95     | 90% or more (2012) |
| South Africa                       | 1991         | 2001          | 20-60     | 0.92    | 0.88     | 75-89% (2008)      |
| South Africa                       | 2001         | 2011          | 20-55     | 0.93    | 0.92     | 75-89% (2008)      |
| Sri Lanka                          | 1981         | 2001          | 30-75     | 1.00    | 0.99     | 90% or more (2009) |
| Sri Lanka                          | 2001         | 2012          | 15-55     | 0.94    | 0.98     | 90% or more (2009) |
| Suriname                           | 1980         | 2004          | 15-65     | 0.87    | 0.87     | 90% or more (2016) |
| Suriname                           | 2004         | 2012          | 20-55     | 0.90    | 0.84     | 90% or more (2016) |
| Tajikistan                         | 1989         | 2000          | 30-70     | 0.82    | 0.93     | 75-89% (2007)      |
| Tajikistan                         | 2000         | 2010          | 5-70      | 1.00    | 0.84     | 75-89% (2007)      |
| Thailand                           | 1990         | 2000          | 50-75     | 0.84    | 0.86     | 85.0% (2012)       |
| Thailand                           | 2000         | 2010          | 50-70     | 0.86    | 0.95     | 85.0% (2012)       |
| Tonga                              | 1996         | 2006          | 50-70     | 1.00    | 0.97     | 70.0% (2002)       |
| Tonga                              | 2006         | 2016          | 50-70     | 1.00    | 0.98     | 70.0% (2002)       |
| Trinidad and Tobago                | 1990         | 2000          | 35-70     | 1.00    | 1.00     | 0.86 (2007)        |
| Trinidad and Tobago                | 2000         | 2011          | 30-65     | 0.96    | 1.00     | 0.86 (2007)        |
| Tunisia                            | 1994         | 2004          | 50-70     | 0.87    | 0.87     | 64.0% (2000)       |
| Turkey                             | 2000         | 2011          | 25-70     | 0.53    | 0.67     | 90% or more (2016) |
| Turkmenistan                       | 1989         | 1995          | 50-70     | 0.91    | 0.99     |                    |
| Uruguay                            | 1996         | 2004          | 35-70     | 1.00    | 1.00     | 90% or more (2015) |
| Uruguay                            | 2004         | 2011          | 40-75     | 1.00    | 1.00     | 90% or more (2015) |
| Uzbekistan                         | 1979         | 1989          | 50-70     | 0.88    | 1.00     | 90% or more (2016) |
| Venezuela (Bolivarian Republic of) | 1990         | 2001          | 15-50     | 0.96    | 0.99     | 90% or more (2016) |
| Venezuela (Bolivarian Republic of) | 2001         | 2011          | 20-60     | 0.90    | 0.99     | 90% or more (2016) |
| Zimbabwe                           | 1992         | 2002          | 15-50     | 0.54    | 0.48     |                    |

Table S1 – *Completeness of death registration from various sources for intercensal periods*

Note: GGB>SEG refers to our estimates for the population aged 5 and above, GBD to the completeness among adults in the GBD 2017, UNSD to the completeness for deaths of all ages. The GGB>SEG estimates refer to the intercensal period, GBD to the mid-point of the period, and reference years for UNSD are provided in the Table.

All estimates of completeness derived from death distribution methods remain ques-



tionable and should be compared with other studies, e.g. from capture-recapture studies [11]. Murray et al. (2010) demonstrate that uncertainty intervals around completeness estimates from DDM are quite large, roughly about 25% [5]. This is in part because death distribution methods are based on assumptions that are often poorly respected in practice. In some cases, we have preferred not to adjust upwards the deaths reported to vital statistics, either because of large migrations flows that could invalidate the method, or because published studies had investigated the completeness of death registration. These exceptions are as follows:

- Brazil: our estimate of completeness based on the GGB>SEG method was 0.96 for the period 1991-2000 and 0.94 for the period 2000-2010. Both the SEG and GGB methods taken separately are higher than 95% for this second period. Li and Gerland (2019) [12] use various death distribution methods and also obtain completeness estimates above 95% after 2000. Hence we did not adjust the vital registration estimates upwards for Brazil.
- Republic of Korea: estimates of completeness obtained from DDMs applied to the WHO Mortality Database are irregular and inconsistent with GBD estimates that place the completeness above 95% after 1990. Based on the study by Hill and colleagues (2005) [13], we assumed that death registration was complete after 1990.
- Syria: It was not possible to use DDMs to estimate completeness as the VR data currently available only cover the years 1983, 1984 and 1998-2010, and the censuses were conducted in 1994 and 2004. VR estimates are currently used without adjustment after 1998.
- Turkey: We cannot estimate completeness after 2010 with DDMs as the last census was conducted in 2011. Özdemir and colleagues (2015) [14] provide estimates for the period 2009-2013 based on population data from TURKSTAT Address Based Population Registration System (ABPRS). They estimate that in the period 2009-2013, death registration was higher than 95% for both sexes. Prior to that, death registration was lower than 80%. In this study, we used the VR data only from 2010.
- Singapore, Bahrain, Sri Lanka: we assumed that the vital registration was complete in these three countries, even though death distribution methods suggest otherwise, most likely due to the perturbing role played by international migrations. In Sri Lanka, the civil war could have introduced disruptions in both the numerators and denominators, such as changes in coverage of the population enumerated in the censuses.

### 1.1.3 CALCULATION OF MORTALITY RATES

The calculation of the probability  ${}_{10}q_{15}$  was derived from a standard period abridged life table. The inputs were the number of deaths for age groups 15-19 (noted  ${}_5D_{15}$ ) and for the age group 20-24 ( ${}_5D_{20}$ ), as well as the mid-year population for the same age groups ( ${}_5P_{15}$  and  ${}_5P_{20}$ ).

- The death rate for age group 15-19,  ${}_5M_{15}$  was obtained by dividing  ${}_5D_{15}$  by  ${}_5P_{15}$ .
- The probability  ${}_5q_{15}$ , which is the risk of dying between age 15 and age 20, was obtained as  ${}_5q_{15} = (5 \times {}_5M_{15})/[1 + (5 - {}_5a_{15}) \times {}_5M_{15}]$ , where  ${}_5a_{15}$  is the average number of years lived by adolescents who died in the age group 15-19 - set at 2.5 for all countries for this study.
- The same calculation was applied for  ${}_5q_{20}$ .
- The probability  ${}_{10}q_{15}$  was computed as  ${}_{10}q_{15} = 1000 \times (1 - (1 - {}_5q_{15}) \times (1 - {}_5q_{20}))$ .

The numbers of deaths and mid-year populations refer to both sexes. Mortality rates were recalculated by pooling deaths and population from successive years together such that the coefficient of variation (the ratio of the standard deviation to the mean) is less than 20%. The stochastic standard errors of the mortality rates were calculated using a Poisson approximation, based on the number of children turning 15 in each year, estimated from the 2019 World Population Prospects [15].

## 1.2 SIBLING SURVIVAL HISTORIES

### 1.2.1 CALCULATION OF MORTALITY RATES

Mortality estimates in adolescents and young people aged 15-24 can be derived from sibling survival histories (SSH). In SSH, women aged 15-49 years are asked to list all their siblings born to the same mother by birth order and to report on their gender, survival status, current age when alive, or age at death and number of years since death when deceased. SSH have been included in about 150 Demographic and Health Surveys (DHS)<sup>7</sup>, about 10 Multiple Indicator Cluster Surveys (MICS)<sup>8</sup> and about 40 World Health Surveys<sup>9</sup>.

In this study, SSH were used to estimate the probability of dying in youth ( ${}_{10}q_{15}$ ) for a period of 0-12 years prior to each survey. This period was divided in intervals of various length (6, 4, 3, 2, 1 years) depending on the coefficient of the variation of the estimates. The original data sets, which have one row for each woman aged 15-49, were reshaped into files containing one row for each sibling. Based on the dates of birth and death (imputed by DHS), each life course was split into different spells; a new spell was created at every birthday and every time the number of completed years preceding the survey changed. These spells were then aggregated to form a new dataset in which each row corresponds to a person-period (a unique combination of a given age group, sex, and time preceding the survey). For each person-period, the exposure time and the number of deaths were summed and weighted by the sample weights. Standard errors were obtained using a Jackknife variance estimation method [16]. Age-specific mortality rates were converted

<sup>7</sup><https://dhsprogram.com/>

<sup>8</sup><https://mics.unicef.org/> - Some MICS surveys also include a summary sibling history with information on the number of adult sisters and the number of these sisters who have died, without information on ages at death.

<sup>9</sup><https://apps.who.int/healthinfo/systems/surveydata/index.php/catalog/whs/about>

into probabilities  ${}_5q_{15}$  and  ${}_5q_{20}$  and these probabilities were chained together to form the probability  ${}_{10}q_{15}$ .

There is a debate in the literature about the presence of selection bias in sibling survival histories because larger sibships are over-represented in the sample, some sibships with no surviving members are not apparent in the data and the respondent is alive and reports on a group which she belongs to [17]. It has been demonstrated, however, that these selection biases cancel each other out when adult mortality is not associated with the number of adult siblings [18, 19]. We assumed here that this was the case and used the standard DHS approach to obtain mortality rates (excluding the respondent when computing person-years of exposure).

### 1.2.2 DATA EXCLUSION AND ESTIMATION OF RECALL BIAS

Sibling survival data have been evaluated in validation studies [20, 21] and compared to census or model-based estimates [22, 23]. Other studies have examined the consistency of mortality rates across surveys [24, 25] and the plausibility of reported sibship sizes against past fertility estimates [26, 27]. This literature suggests that sibling histories could lead to underestimates of adult mortality due to under-reporting of deaths, especially for reference periods located more than 10 to 15 years before the survey. Under-reporting of deaths could be amplified or attenuated by systematic misstatement of ages and the timing of deaths. The magnitude of these biases likely varies by age but few studies have assessed biases in the 15-24 age group specifically. In a validation study in a Health and Demographic Surveillance System (HDSS) in Senegal, Hellingner and colleagues (2014) observed that sibling histories led to an underestimation of mortality only from the age of 50 onwards [20]. In younger age groups, sibling survival estimates were consistent with mortality levels in the HDSS. Biases affecting sibling data may, therefore, be limited when estimating youth mortality but additional validation studies are needed to reach firmer conclusions. To account for the possibility of bias, we proceeded in two steps. First, we excluded surveys that presented implausible age patterns of mortality and second, we modelled reporting bias in the surveys that were retained.

First, we examined age patterns of mortality contained in surveys against a standard based on high-quality mortality data. This standard was built from the following sources:

- The 5x5 life tables from the Human Mortality Database [28], representing the historical experience of 41 countries or areas with long statistical tradition of accurate vital registration;
- Life tables recalculated for periods of 2 or 3 years from publicly-available datasets from 48 Health and Demographic Surveillance Systems (HDSS)<sup>10</sup>;

---

<sup>10</sup>Life tables from the following HDSS were retained: Chakaria and Matlab (ICDDR,B Area) in Bangladesh; Nanoro, Nouna, Ouagadougou and Oubritenga in Burkina Faso; Taabo in Côte d'Ivoire; Arba Minch, Butajira, Dabat, Gilgel Gibe, Harar Urban, Kersa, Kilite Awlaelo in Ethiopia; Farafenni in The Gambia; Dodowa, Kintampo and Navrongo in Ghana; Bandim in Guinea-Bissau; Vadu in India; Kilifi, Kisumu/KEMRI-CDC, Kombewa, Mbita and Nairobi in Kenya; Karonga in Malawi; Chokwe and

- Life tables based on vital registration data from Mauritius and sample vital registration data from India (obtained from the UN Population Division).

The relationship between  ${}_5q_0$  and  ${}_{10}q_{15}$  in these various life tables is presented in Figure S2 below, using a log-log scale, alongside the relationship captured in historical model life tables (here the North and South models of Coale and Demeny life tables<sup>11</sup>).

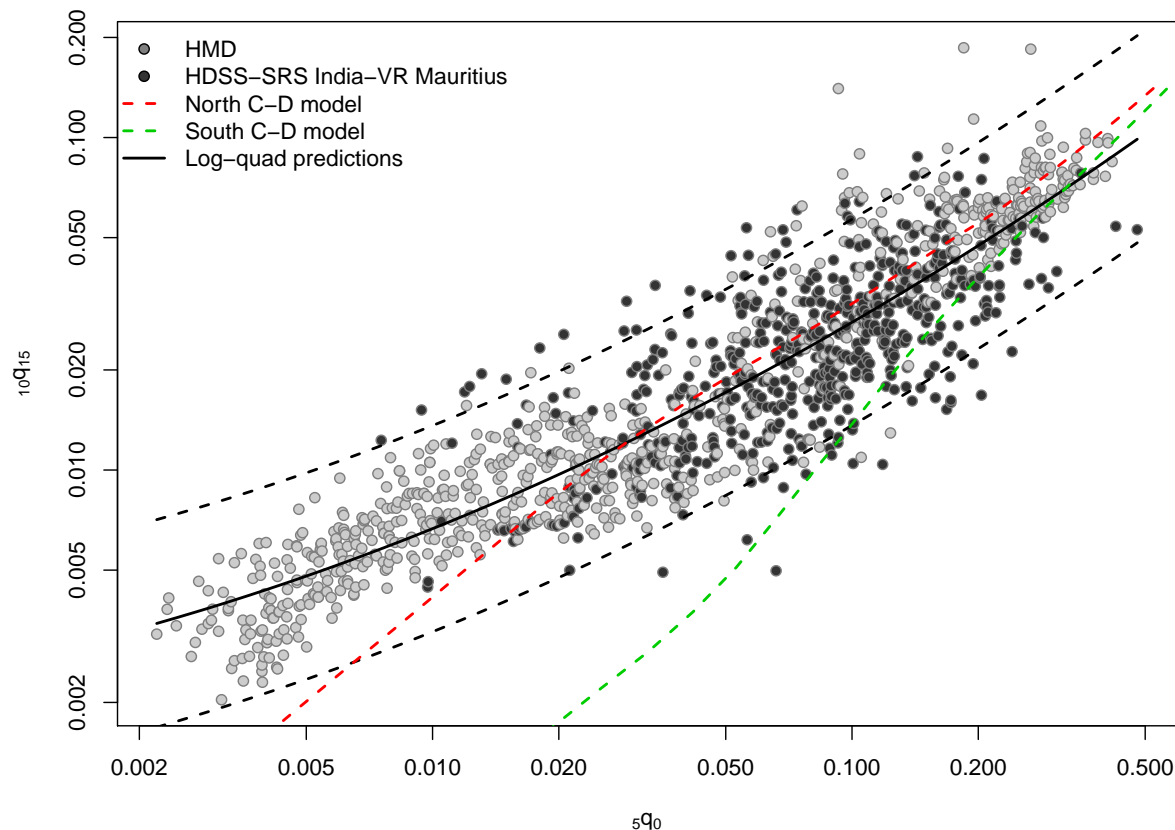

Figure S2 – Relationship between  ${}_5q_0$  and  ${}_{10}q_{15}$  in the life tables from HMD, HDSS, SRS in India and VR in Mauritius.

Note: the dotted lines in color refer to the  ${}_{10}q_{15}$ -to- ${}_5q_0$  relationship in Coale-Demeny model life tables (revised by the United Nations to achieve life expectancies up to 100 years for population projections).

Manhica in Mozambique; Nahuche in Nigeria; Bandafassi, Mlomp and Niakhar in Senegal; Africa Centre, Agincourt and Dikgale in South Africa; Ifakara Rural, Magu and Rufiji in Tanzania; Iganga/Mayuge and Rakai in Uganda; Dar es Salaam, Hai, Magu and Morogoro in Tanzania; Chililab and Nam FilaBavi in Viet Nam; Gwembe in Zambia; Manicaland in Zimbabwe.

<sup>11</sup>United Nations Population Division, Extended model life tables, available at <https://www.un.org/en/development/desa/population/publications/mortality/model-life-tables.asp>, accessed June 04, 2020

From this database containing about 1300 data points, we used a log-quadratic regression model to predict, for a given level of under-five mortality, what would be the expected level of mortality between the ages of 15 and 25:

$$y_i = (\beta_0 + \beta_1 x_{i1} + \beta_2 x_{i2}) + \epsilon_i \quad (1)$$

where  $y_i$  is value of  $\log({}_{10}q_{15})$  for observation  $i$ ,  $x_{i1}$  is the value of  $\log({}_5q_0)$  for observation  $i$  and  $x_{i2}$  equals  $(\log({}_5q_0))^2$  for observation  $i$ . The independent errors terms  $\epsilon_i$  are normally distributed. Prediction intervals around  $\log({}_{10}q_{15})$  for a new estimate of  $\log({}_5q_0)$  were be obtained as

$$\hat{y}_h \pm t_{(\alpha/2, n-p)} \times \sqrt{MSE + (se(\hat{y}_h))^2} \quad (2)$$

where  $\hat{y}_h$  is the fitted value when the predictor values are  $\mathbf{X}_h = (1, X_{h,1}, X_{h,2})^T$ ,  $t_{(\alpha/2, n-p)}$  is the  $t$ -multiplier and  $\sqrt{MSE + (se(\hat{y}_h))^2}$  is the standard error of the prediction.

Turning to sample surveys, we extracted the probability  ${}_5q_0$  from birth histories for the period 0-12 years prior to data collection and the probability  ${}_{10}q_{15}$  from sibling histories for the same period. We used Eq.2 to obtain the 95% intervals around the predicted value of  $\log({}_{10}q_{15})$  for the observed value of  $\log({}_5q_0)$ . We checked if these prediction intervals contained the observed value of  $\log({}_{10}q_{15})$ . When they did not, the mortality pattern encompassed in survey estimates was deemed implausible, and all survey data points were excluded so that they did not inform the model fitting. This procedure assumes that birth histories are unbiased and that our standard adequately reflect the  ${}_{10}q_{15}$ -to- ${}_5q_0$  relationship in all countries for which we have sample surveys.

This quality requirement led to the exclusion of 9 DHS surveys (out of 148)<sup>12</sup>, 13 WHS surveys (out of 42)<sup>13</sup> and 3 MICS (out of 9)<sup>14</sup>. Judging from the proportions of surveys excluded from the model fit by type of series, sibling histories collected in the WHS and MICS surveys seem of lower quality than in DHS. Hence, biases in levels and trends were estimated from the B3 specifically for sibling histories from DHS on the one hand, and those from WHS and MICS on the other.

Finally, we modelled the bias in the remaining surveys, both in terms of the level and the trend, as a function of the retrospective period. This bias was estimated by contrasting the sibling-based estimates with vital registration data for overlapping time periods (see section 2.3 below).

---

<sup>12</sup>The following DHS were excluded: Bangladesh 2001, Indonesia 1997, Mali 1995-1996, Nigeria 1999, Morocco 1992 and 2003-2004, Peru 2009, 2010 and 2012.

<sup>13</sup>We excluded the following WHS: Bosnia & Herzegovina, Chad, China, Comoros, Congo, Estonia, Malaysia, Mauritania, Pakistan, Senegal, Slovakia, Ukraine, Uruguay. The implausible trends in mortality in estimates extracted from the WHS surveys conducted in Philippines and Mexico, as well as the very wide uncertainty intervals around estimates in Georgia and Russian Federation led us to exclude these four surveys.

<sup>14</sup>The following MICS were excluded: Bhutan 2010, Lao PDR 2012, Mauritania 2011.

### 1.3 RECENT HOUSEHOLD DEATHS IN CENSUSES AND SURVEYS

Censuses often include questions on household deaths in the last 12 months, which can be used to calculate mortality estimates for the population aged 15-24. The calculation of the probability  ${}_{10}q_{15}$  was derived from a standard period abridged life table. As for sibling histories, we checked the  ${}_{10}q_{15}$ -to- ${}_{-5}q_0$  relationship observed in the data against the predictions of the log-quadratic model above, and discarded estimates that fell outside of the 95% predictions intervals. This assessment led to the exclusion of about 29% of observations from censuses.

In most cases, we did not adjust for incompleteness of death reporting in surveys and censuses. However, in China, we used published estimates from census data from 1982 to 2000, adjusted for incompleteness of death reporting with the General Growth Balance method by Banister and Hill (2004) [29]. To be consistent with this study, we also evaluated the completeness of death reporting in the 2010 census with the General Growth Balance method [30].

## 2 ESTIMATION MODEL

### 2.1 STATISTICAL MODEL

To obtain estimates of the probability  ${}_{10}q_{15}$  for all country-years based on all available data, we applied to the 15-24 age group the model used by the UN IGME to monitor trends in under-five mortality. This is a Bayesian penalized B-splines bias-reduction (B3) model. All details on B3 are available in Alkema and New (2014) [31]. We repeat below the main features of this model to highlight a few changes implemented for the 15-24 age group.

We let  $u_i$  denote the observed probability  ${}_{10}q_{15}$  for the observation  $i$  in country  $c[i]$  and year  $t[i]$ :  $u_i = U_{c[i]}(t[i]) \cdot \varepsilon_i$ , where  $U_c(t)$  denotes the true probability  ${}_{10}q_{15}$  and  $\varepsilon_i > 0$  is the error multiplier. On the natural log-scale, this corresponds to

$$y_i = f_{c[i]}(t[i]) + \delta_i, \quad (3)$$

where  $y_i = \log(u_i)$ ,  $f_c(t) = \log(U_c(t))$ , and  $\delta_i = \log(\varepsilon_i)$ .

### 2.2 BAYESIAN PENALIZED SPLINES REGRESSION

The regression spline model for  $f_c(t)$  from Eq.(3) is given by:

$$f_c(t) = \sum_{k=1}^{K_c} B_{c,k}(t) \alpha_{c,k}, \quad (4)$$

where  $\alpha_{c,k}$  refers to splines coefficient  $k$  in country  $c$  and  $B_{c,k}(t)$  the  $k$ -th spline, evaluated in year  $t$ , given by a third order B-spline [32, 33]. Equally spaced knots were used such that the resulting splines are non-zero for a total of  $4 \cdot I$  years, where  $I$  refers to the in-between

knots interval length. We chose  $I = 2.5$  years such that each spline is non-zero for 10 years. In each country, the knots were placed such that the largest two splines  $B_{c,K_c-2}(t)$  and  $B_{c,K_c-1}(t)$  in the most recent observation year  $t = t_{n_c}$  have equal height while  $B_{c,K_c}(t)$  is close to zero.

When fitting the splines model from Eq.(4) to the observations, second-order differences in adjacent spline coefficients ( $\Delta^2\alpha_k = \alpha_k - 2\alpha_{k-1} + \alpha_{k-2}$ ) are penalized to guarantee smoothness of the resulting  ${}_{10}q_{15}$  trajectory and to project forward the recently observed rate of change past the most recent data. Let  $\mathbf{t}_c = (t_{c,1}, \dots, t_{c,n_c})'$  refer to the vector of country-specific observation years with spline model estimate  $f_c(\mathbf{t}_c) = (f(t_{c,1}), \dots, f(t_{c,n_c}))'$ .

The splines model  $f_c(\mathbf{t}_c) = \mathbf{B}_c(\mathbf{t}_c)\boldsymbol{\alpha}_c$ , with  $\mathbf{B}_c(\mathbf{t}_c) = (B_{c,1}(\mathbf{t}_c), \dots, B_{c,K_c}(\mathbf{t}_c))$ ,  $\boldsymbol{\alpha}_c = (\alpha_{c,1}, \dots, \alpha_{c,K_c})'$ , can be written as follows [34, 33]:

$$\begin{aligned} f_c(\mathbf{t}_c) &= \mathbf{B}_c(\mathbf{t}_c)\mathbf{G}_{K_c}\mathbf{b}_c + \mathbf{Z}_c(\mathbf{t}_c)\mathbf{e}_c, \\ \mathbf{G}_{K_c} &= (\mathbf{1}_{K_c}, \mathbf{g}_{K_c})', \text{ where } \mathbf{g}_{K_c} = (1 - K_c/2, \dots, K_c - K_c/2)', \\ \mathbf{Z}_c(\mathbf{t}_c) &= \mathbf{B}_c(\mathbf{t}_c)\mathbf{D}'_{K_c}(\mathbf{D}_{K_c}\mathbf{D}'_{K_c})^{-1}, \end{aligned} \quad (5)$$

where in difference matrix  $\mathbf{D}_{K_c}$ ,  $D_{K_c,i,i} = D_{K_c,i,i+2} = 1$ ,  $D_{K_c,i,i+1} = -2$  and  $D_{K_c,i,j} = 0$  otherwise.

The first part in Eq.(5),  $\mathbf{B}_c(\mathbf{t}_c)\mathbf{G}_{K_c}\mathbf{b}_c$ , describes the linear trend during the observation period, and the second part  $\mathbf{Z}_c(\mathbf{t}_c)\mathbf{e}_c$  describes the fluctuations around the main trend. The unknown parameters are given by  $\mathbf{b}_c = (b_{c,0}, b_{c,1})'$ , and  $\mathbf{e}_c = \mathbf{D}_{K_c}\boldsymbol{\alpha}_c$ , where  $\mathbf{e}_c = (e_{c,1}, \dots, e_{c,Q_c})'$ , with  $Q_c = K_c - 2$  and  $e_{c,q} = \Delta^2\alpha_{c,q+2}$  for  $q = 1, \dots, Q_c$ . Second-order differences are penalized by imposing

$$e_{c,q} \sim N(0, \sigma_c^2), \text{ for } q = 1, \dots, Q_c, \quad (6)$$

where variance  $\sigma_c^2$  determines the extent of smoothing; a smaller variance corresponds to smoother trajectories. In the limit when  $\sigma_c$  decreases to zero, a linear fit for  $\log({}_{10}q_{15})$  is obtained.

The model is fit in the Bayesian framework. No information on levels or trends during the observation period is exchanged across countries when estimating the spline coefficients. Information exchanged across countries only concerns the variability of the (second order) difference in the spline coefficients through a multilevel model. The variance of  $e_{c,q} = \alpha_{c,q+2} - 2\alpha_{c,q+1} + \alpha_{c,q}$  is estimated hierarchically:

$$\log(\sigma_c) \sim N(\chi, \varphi_\sigma^2). \quad (7)$$

Vague prior distributions are used for the  $\mathbf{b}_c$ 's and the hyper parameters for the hierarchical model for the  $\sigma_c$ 's [31].

### 2.3 DATA MODEL

The error distribution for observations from complete VR or SVR is given by

$$\delta_i \sim N(0, \tau_i^2/u_i^2),$$

where  $\tau_i/u_i$  is the stochastic standard error. These errors are calculated using a Poisson approximation (using the numbers of adolescents turning 15 from the World Population Prospects 2019) and set to a minimum of 2.5%. If the Poisson sampling standard error cannot be calculated (e.g. for Sample Registration Systems), it is set to 10%.

For non-VR data,  $\delta_i$ , the error term on the log-scale, is specified as follows:

$$\delta_i = E_i + S_i \cdot X_i,$$

where  $E_i$  is the mean bias,  $S_i$  the scale parameter and  $X_i$  determines the distribution for observation  $i$ .

For all non-VR data series with repeated observations, mean biases were modeled as a linear function of the retrospective period of the observation in the survey:

$$E_i = \beta_{0,s[i]} + \beta_{1,s[i]} \cdot \pi_i, \quad (8)$$

where  $\beta_{0,s[i]} + \beta_{1,s[i]} \cdot \pi_i$  represents the bias in level and trend as a function of the retrospective period  $\pi_i$  for observation  $i$  in data series  $s[i]$ . The retrospective period  $\pi_i$  was centered at 5 years for this study. The bias in the level of the series,  $\beta_{0,s}$  is estimated with a multilevel model:

$$\beta_{0,s} \sim N(\mu_{0,d[s]}, \gamma_{0,d[s]}^2), \quad (9)$$

where  $d[s]$  refers to the source type of series  $s$ , based on data source (the source types with multiple observations per series are given by DHS Direct and Others Direct (MICS and WHS surveys)), and  $\mu_{0,d}$  and  $\gamma_{0,d}^2$  represent source type-specific mean bias and between-series variance respectively. A similar approach is used to estimate the slope  $\beta_{1,s}$ :

$$\beta_{1,s} \sim N(\mu_{1,d[s]}, \gamma_{1,d[s]}^2), \quad (10)$$

where  $\mu_{1,d}$  and  $\gamma_{1,d}^2$  represent the mean slope and the between-series variance for source type  $d$ . For single observations constructed from reported household deaths, and single observations obtained from reported life tables, we assume that  $E_i = \mu_{0,d[s[i]}}$ .

Scale parameter  $S_i$  is modeled as a combination of sampling variance  $\tau_i^2/u_i^2$  (based on sampling variance  $\tau_i^2$  for  $10q15$ ) and non-sampling variance  $\omega_{d'[s[i]]}^2$ :

$$S_i^2 = \omega_{d'[s[i]]}^2 + \tau_i^2/u_i^2, \quad (11)$$

where source type  $d'[s]$  for series  $s$  refers to a further breakdown of source types to distinguish between DHS, Other (MICS and WHS) and recent household deaths. Where the sampling variance for non-VR data is not reported, we assume a sampling standard error of 10%.

Finally, the distribution for  $\delta_i$  is given by:

$$X_i \sim \begin{cases} N(0, 1) & \text{for Standard and Other DHS direct,} \\ t_\nu & \text{otherwise, with } \nu \sim U(2, 30). \end{cases} \quad (12)$$



A  $t$ -distribution with  $\nu$  degrees of freedom is used for observations that are not obtained from Standard or Other DHS, in accordance with the model used by UN IGME for under-five mortality.

All model parameters in Eq.(8)–(12) were assigned vague prior distributions. In the UN IGME model for under-five mortality, an informative prior distribution was used for the mean bias  $\mu_{0,d}$  for the DHS Direct series, but here we used vague prior distributions for all parameters.

Figure S3 presents mean biases and 90% prediction intervals for “new” data points by type of data source. This visualization shows that for a “true” level of the probability  ${}_{10}q_{15}$  of 15 deaths before age 25 per 1000 adolescents at age 15, the mean bias will vary across data sources and with the length of the retrospective period (in the survey estimates). The prediction intervals based on uncertainty in the bias parameters only (dark colors) are large, indicating that there is substantial variability in biases across data series of the same source type. Mean biases tend to be negative in sample surveys and slightly positive for data on recent household deaths (represented in pink). The median of the predicted  ${}_{10}q_{15}$  for a retrospective period of 2 years (our first estimate from DHS) is 14.9 per thousand (12.4–17.3). For a retrospective period of 10 years, it declines to 12.4 (10.3–14.6), corresponding to under-estimating the true level by about 17%. This is consistent with previous studies on sibling histories indicating that the quality of death reporting declines as the reference periods stretch back in the past [24, 25, 22].

## 2.4 EXTRAPOLATIONS

For extrapolations, we implemented a logarithmic pooling procedure to combine country-specific posterior predictive distributions for changes in spline coefficients with a global posterior predictive distribution. This procedure was applied to modify the posterior predictive distributions for  $\alpha_{c,k}$  for  $k = K_c, K_c + 1, \dots, P_c$ , where  $P_c$  refers to the last spline in the projection period of interest. While  $\alpha_{c,K_c}$  was among the spline coefficients that were included in the observation period up to year  $t_{n_c}$ , it was included in the set of “projected” coefficients to be pooled because its estimate is based mainly on an extrapolation of past changes. The logarithmic pooling weight  $\kappa$ , which determines the extent of pooling, was set at 0.8 for this study, after examination of country plots for various weights and also based on validation outputs (see below). Further details on the logarithmic pooling procedure are provided in [31].

## 2.5 COMPUTATION

A Markov Chain Monte Carlo (MCMC) algorithm was employed to sample from the posterior distribution of the parameters in the global and country-specific models with the use of the software JAGS. For the global run, 10 parallel chains with different starting points were run with a total of 75,000 iterations in each chain. Of these, the first 25,000 iterations in each chain were discarded as burn-in and every 20th iteration after was retained. The resulting chains contained 2,500 samples each. For the country-specific runs, we ran 10

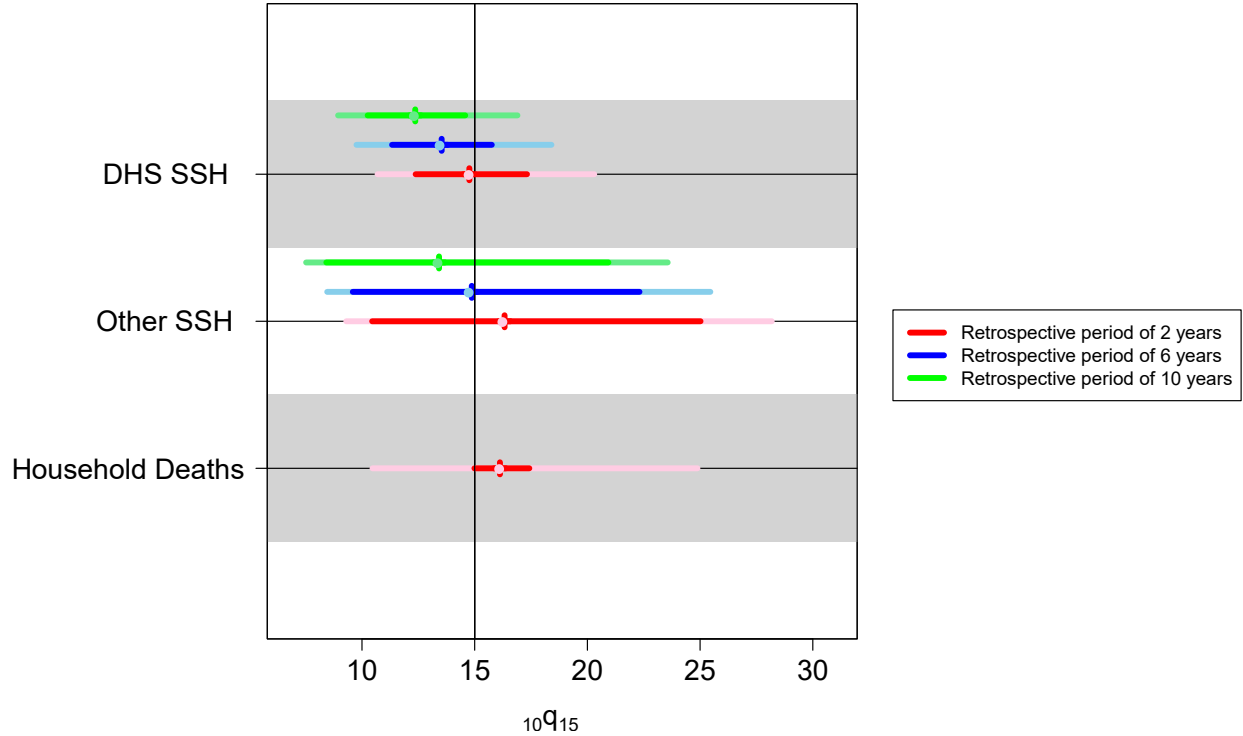

Figure S3 – 90% prediction intervals for new data points by source type and length of the retrospective period.

Note: For a “true” probability  ${}_{10}q_{15}$  of 15 deaths per 1,000 adolescents aged 15 (represented by the vertical black line), the predicted mean observed  ${}_{10}q_{15}$  is represented by the colored vertical lines. The difference between the mean  ${}_{10}q_{15}$  and 15 represents the mean bias. The dark horizontal lines represent the 90% prediction intervals for an observation based on uncertainty in the bias parameters only (excluding sampling and non-sampling variability), while the 90% prediction intervals excluding the sampling variability are in light colors.

chains with a total of 62,500 iterations in each chain. Of these, the first 25,000 iterations in each chain were discarded as burn-in and every 30th iteration after was retained. The resulting chains contained 1,250 samples each.

A computationally cheaper model was implemented to allow for updates of country-specific estimates with additional data without the need to re-run the global model. Non-country-specific parameters were fixed at the posterior medians from the global model run. Both models resulted in very similar estimates.

In some countries, there was insufficient smoothing, resulting in unrealistic short-term changes for a subset of country-years without VR data. For these countries, instead of using country-specific smoothing determined by variance parameter  $\sigma_c^2$  from Eq.(7), we set  $\sigma_c = \exp(\hat{\chi})$ , where  $\hat{\chi}$  refers to the posterior median of  $\mu$ , which is referred to as the global smoothing level. This subset includes 1) countries with both VR and non-VR data, or both adjusted and non-adjusted VR data, 2) countries that have VR data with gaps more than 5 years in the data, as well as 3) small countries with less than 15,000 adolescents aged 15 in 2019 (based on the World Population Prospects 2019).

## 2.6 ADJUSTMENTS FOR CRISIS-RELATED MORTALITY

Adjustments were made to account for abrupt increases in mortality due to conflicts and/or disasters, which would otherwise not be present in the smoothed mortality curves obtained from the statistical model. Vital registration systems, survey programs and censuses might also miss some crisis-related deaths, due to disruptions in the notification of deaths, interruptions in data collection or because some households have been dissolved as a result of mass displacement.

WHO has been estimating conflict deaths for their Global Health Estimates (GHE) and has relied primarily on databases maintained by the Uppsala Conflict Data Program (UCDP) together with information from a number of country-specific data sources [35, 36]. Since 2014, the Armed Conflict Location and Event Data Project (ACLED) has been collecting and making available detailed disaggregated information on conflicts and political violence in over 100 countries in real-time [37, 38]. As of early 2020, ACLED included conflict deaths for 92 countries. ACLED includes all African countries from 1997 onwards. However, ACLED data has only become reasonably complete for several other regions from 2016 onwards and does not yet include countries in the Americas.

For updated estimates of conflict deaths for the period 1990-2019, ACLED data for conflict deaths to the end of 2019 were assessed for consistency with conflict deaths estimated using previous GHE methods. The latter were updated using the latest available data from UDCP for Battle-Related Deaths (version 19.1-1989-2018), Non-State Conflict Dataset (version 19.1-1989-2018), and One-sided Violence Dataset (version 19.1-1989-2018) [35]. Estimates for countries using other specific data sources [36] were also updated.

ACLED-based estimates are generally very consistent with the updated GHE estimates and were used to update years beyond 2006 for most regions. Additionally, for some high-conflict countries such as Afghanistan, Syria, Iraq and Yemen where GHE estimates have in the past been based on country-specific data sources with somewhat ad-hoc methods, ACLED offers a single reasonably consistent alternative and was used to revise and update the conflict death time series.

Age-sex distributions for conflict deaths were applied to estimates of total conflict deaths by country-year based on available distributions of conflict deaths by age and sex for specific conflicts [36].

Estimated deaths for major natural disasters up to and including 2019 were obtained from the EM-DAT/CRED International Disaster Database [39]. GHE age-sex distributions were used. These are based on a number of studies of earthquake deaths and tsunami deaths [36].

Direct and indirect deaths caused by the Ebola epidemic in 2014-2016 in Guinea, Liberia and Sierra Leone were added based on WHO Global Health Estimates.

For inclusion of crisis deaths, the splines regression model is fitted to “extreme event-free” observations (obtained as the observed values of the probability  $_{10}q_{15}$  minus the ex-

treme events). The estimated additional mortality for the crisis event is then added. Uncertainty intervals for  ${}_{10}q_{15}$  for the crises-years are based on the uncertainty in crisis-free  ${}_{10}q_{15}$ . The following criteria were used to identify crises:

1. The crisis was isolated to a few years,
2. Crisis deaths among adolescents and young adults aged 15-24 were  $>10\%$  of non-crisis deaths in this age group,
3. The crisis  ${}_{10}q_{15}$  was greater than 0.2 per 1,000,
4. The number of crisis deaths among youth was greater than 10.

In total, adjustments for crises were made in 61 countries, listed below.

| Country                        | Year(s) with adjustment  |
|--------------------------------|--------------------------|
| Albania                        | 1997                     |
| Algeria                        | 1994 1995 1997 1998 2003 |
| Angola                         | 1990 1993 1994           |
| Armenia                        | 1992 - 1994              |
| Azerbaijan                     | 1992 - 1994              |
| Bahrain                        | 2011                     |
| Bangladesh                     | 1991                     |
| Bhutan                         | 2000                     |
| Bosnia & Herzegovina           | 1992 - 1995              |
| Burundi                        | 1993 - 1998 2000 2002    |
| Central African Republic       | 2013 2014 2017 2018      |
| Chad                           | 1990 2006                |
| China                          | 2008                     |
| Comoros                        | 1997                     |
| Congo                          | 1997 - 1999              |
| Congo DR                       | 1996 1997                |
| Croatia                        | 1991 - 1995              |
| Djibouti                       | 1992                     |
| El Salvador                    | 1990                     |
| Ethiopia                       | 1990 1999 2000           |
| Federated States of Micronesia | 2002                     |
| Georgia                        | 1991 - 1993 2008         |
| Guinea-Bissau                  | 1998 1999                |
| Haiti                          | 2004 2010                |
| Honduras                       | 1998                     |
| Indonesia                      | 2004                     |
| Iran                           | 1990 2003                |
| Iraq                           | 1991 2003 - 2019         |

| Country            | Year(s) with adjustment                        |
|--------------------|------------------------------------------------|
| Israel             | 2002                                           |
| Japan              | 1995 2011                                      |
| Jordan             | 2005                                           |
| Kuwait             | 1990 1991                                      |
| Lebanon            | 1990 1996 2006 2008 2011 - 2017                |
| Liberia            | 1990 1993 - 1996 2001 2003 2014                |
| Libya              | 2011 2012 2014 - 2019                          |
| Macedonia          | 2001                                           |
| Maldives           | 2004                                           |
| Moldova            | 1992                                           |
| Myanmar            | 2008                                           |
| Nepal              | 2002 2004 2015                                 |
| Nicaragua          | 1998                                           |
| Papua New Guinea   | 1998                                           |
| Peru               | 1990 1991                                      |
| Philippines        | 1991                                           |
| Rwanda             | 1993 - 1995 1997 2001 2009                     |
| Samoa              | 2009                                           |
| Saudi Arabia       | 2017 - 2019                                    |
| Serbia             | 1991 - 1993 1995                               |
| Sierra Leone       | 1995 1998 1999 2014                            |
| Somalia            | 1990 - 1992                                    |
| South Sudan        | 2012 - 2017                                    |
| Sri Lanka          | 1990 - 1992 2004 2008 2009                     |
| State of Palestine | 2001 - 2004 2006 2009 2014                     |
| Sudan              | 1990 - 1993 1997 1998 2000 2001 2003 2004      |
| Syria              | 2011 - 2020                                    |
| Tajikistan         | 1992 1993 1996 1998                            |
| Turkey             | 1994 1997 1999 2016                            |
| Ukraine            | 2014 2015                                      |
| Vanuatu            | 1997                                           |
| Venezuela          | 1999                                           |
| Yemen              | 1991 1992 1994 1995 1998 1999 2012 2014 - 2020 |

When applied to under-five mortality, the B3 model also includes adjustments for biases introduced by HIV/AIDS, because survey data come from mothers. Among these mothers, some are HIV-positive and without treatment, they face excess mortality and risk of transmitting the virus to their children. Birth histories, therefore, underestimate under-five mortality in settings where treatment is not widely available, or for earlier periods before treatment became widespread. No adjustment is made here for mortality between 15 and 25 years of age, as the data are derived from information provided on sibling survival by adult respondents.

## 2.7 MODEL VALIDATION

To assess the performance of the B3 model for  ${}_{10}q_{15}$ , we used out-of-sample validation. A training set was constructed by removing all data collected in or after 2013 (i.e. about 20% of observations were left out). All retrospective observations from a survey carried out in or after 2013 were left out of the training set, even if they referred to periods before 2013. We present below two sets of validation results: based on left-out observations (Tables S3 and S4), and based on the comparison between estimates obtained from the training and full data set (Table S5). Results are presented for estimates without crises in high mortality countries, defined as countries with a probability  ${}_{10}q_{15}$  above 12 per 1000 youths aged 15 in 1990. We compare validation measures for  ${}_{10}q_{15}$  with those obtained by Alkema and New (2014) for U5MR<sup>15</sup> and those obtained when applying B3 to mortality in children aged 5-14<sup>16</sup>. Results are presented for two values of the pooling weight  $\kappa$ ; 0.5 to compare across studies and 0.8 as it is the pooling weight retained for  ${}_{10}q_{15}$ .

Table S3 presents the percentage of observations falling below and above the 90% uncertainty intervals based on the training set<sup>17</sup>. If the model is well-calibrated, around 5% of observations should fall below and above the 90% uncertainty intervals based on the training set. This is what we observed for the most recent period. There seems to be some asymmetry in coverage in the period before 2013, but this is based only on 26 high-mortality countries only. 11% of observations fall below the lower bound obtained from the training set, corresponding to about 3 countries out of 26. If the model is well calibrated, the chance of having at least 3 countries outside the interval is 13.8% (if we take a random sample of size 26 with a probability of 0.05 of being outside). Hence this percentage should not be interpreted as a sign of poor performance.

Results reported in Table S4 refer to the mean and median relative error and absolute relative error. Errors are defined as  $\epsilon_i = u_i - \tilde{u}_i$ , where  $\tilde{u}_i$  is the posterior median of the predictive distribution for a left-out observation  $u_i$  based on the training set. The median or mean relative error (MRE) and the median or mean absolute relative error (MARE) are larger than those of under-five mortality for the period before 2012, but relatively similar for the most recent period.

Table S5 presents the results based on a comparison between estimates based on the training and full data set. The error in the estimate based on the training sample is defined as  $\epsilon_{c,t} = \hat{U}_c(t) - \tilde{U}_c(t)$ , where  $\tilde{U}_c(t)$  refers to the posterior median estimate based on the training sample, and  $\hat{U}_c(t)$  refers to the  ${}_{10}q_{15}$  estimate obtained from the full data set for country  $c$  in year  $t$ . Relative error is defined as  $\epsilon_{c,t}/\hat{U}_c(t) \cdot 100$ . Again, the validation measures are the mean and median relative error and absolute relative error, and the

---

<sup>15</sup>Their results refer to high mortality countries with U5MR above 40 per thousand in 1990, without HIV adjustments.

<sup>16</sup>These results refer to high mortality countries with  ${}_{10}q_5$  above 8 per thousand in 1990.

<sup>17</sup>These percentages were calculated for 100 sets of left-out observations, where each set consisted of a random sample of one left-out observation per country. The results presented in Table S3 are the median and standard deviation of these percentages based on the outcomes in the 100 sets.

Table S3 – Validation results based on left-out observations: Median and SD of percentage of observations below and above 90% predictions intervals based on the training set, from 100 sets of left-out observations, in countries with data in both the training and test set and left-out observations in the period of interest.

|                                                             | ${}_{10}q_{15}$ (this study) |           | Nb countries |
|-------------------------------------------------------------|------------------------------|-----------|--------------|
|                                                             | % Below                      | % Above   |              |
| $\kappa = 0.5$                                              |                              |           |              |
| Year $\leq$ 2012                                            | 11.5 (4.3)                   | 3.8 (2.6) | 26           |
| Year $>$ 2012                                               | 5.0 (2.1)                    | 5.0 (1.4) | 60           |
| $\kappa = 0.8$                                              |                              |           |              |
| Year $\leq$ 2012                                            | 15.4 (4.2)                   | 3.8 (2.6) | 26           |
| Year $>$ 2012                                               | 5.0 (1.9)                    | 5.0 (1.8) | 60           |
| ${}_5q_0$ (Sc: Alkema & New 2014 - $\kappa = 0.5$ )         |                              |           |              |
|                                                             | % Below                      | % Above   | Nb countries |
| Year $\leq$ 2005                                            | 7.0 (2.4)                    | 7.0 (1.8) | 71           |
| Year $>$ 2005                                               | 6.2 (1.5)                    | 1.5 (1.0) | 65           |
| ${}_{10}q_5$ (Sc: Masquelier et al. 2018 - $\kappa = 0.5$ ) |                              |           |              |
|                                                             | % Below                      | % Above   | Nb countries |
| Year $\leq$ 2007                                            | 2 (2.1)                      | 2 (1.3)   | 49           |
| Year $>$ 2007                                               | 5.8 (1.2)                    | 0 (0.7)   | 52           |

Table S4 – Validation results based on left-out observations: median or mean error (ME), median or mean relative error (MRE), median or mean absolute relative error (MARE) based on the training set.

|                                                             | ${}_{10}q_{15}$ (this study) |            |             |            |
|-------------------------------------------------------------|------------------------------|------------|-------------|------------|
| <b>Median</b>                                               | ME                           | MAE        | MRE         | MARE       |
| $\kappa = 0.5$                                              |                              |            |             |            |
| Year $\leq$ 2012                                            | -1.2 (1.1)                   | 5.1 (1.2)  | -5.5 (5.7)  | 22.2 (4.1) |
| Year $>$ 2012                                               | -0.6 (0.2)                   | 2.5 (0.2)  | -5.5 (2.1)  | 16.2 (1.8) |
| $\kappa = 0.8$                                              |                              |            |             |            |
| Year $\leq$ 2012                                            | -1.2 (1.2)                   | 4.8 (1.2)  | -5.2 (6.3)  | 20.9 (4.7) |
| Year $>$ 2012                                               | -0.6 (0.2)                   | 2.2 (0.2)  | -4.6 (2.2)  | 15.3 (1.7) |
| <b>Mean</b>                                                 | ME                           | MAE        | MRE         | MARE       |
| $\kappa = 0.5$                                              |                              |            |             |            |
| Year $\leq$ 2012                                            | -2.6 (1.1)                   | 6.8 (0.8)  | -20.0 (5.1) | 33.3 (4.4) |
| Year $>$ 2012                                               | -1.7 (0.4)                   | 4.8 (0.3)  | -14.4 (2.4) | 30.1 (1.9) |
| $\kappa = 0.8$                                              |                              |            |             |            |
| Year $\leq$ 2012                                            | -2.7 (1.3)                   | 6.9 (0.9)  | -20.2 (5.4) | 34.4 (4.3) |
| Year $>$ 2012                                               | -1.6 (0.3)                   | 4.4 (0.4)  | -12.7 (2.1) | 26.6 (1.7) |
| ${}_{5}q_0$ (Sc: Alkema & New 2014) - $\kappa = 0.5$        |                              |            |             |            |
| <b>Median</b>                                               | ME                           | MAE        | MRE         | MARE       |
| Year $\leq$ 2005                                            | -1.7 (1.3)                   | 10.7 (1.3) | -1.9 (1.3)  | 12.9 (1.4) |
| Year $>$ 2005                                               | -3.7 (0.1)                   | 7.6 (1.2)  | -10.7 (1.1) | 17.5 (1.5) |
| <b>Mean</b>                                                 | ME                           | MAE        | MRE         | MARE       |
| Year $\leq$ 2005                                            | -1.9 (1.4)                   | 15.8 (1.1) | -3.8 (1.6)  | 17.6 (1.3) |
| Year $>$ 2005                                               | -6.0 (0.5)                   | 14.2 (0.5) | -14.8 (1.2) | 25.8 (1.1) |
| ${}_{10}q_5$ (Sc: Masquelier et al., 2018) - $\kappa = 0.5$ |                              |            |             |            |
| <b>Median</b>                                               | ME                           | MAE        | MRE         | MARE       |
| Year $\leq$ 2007                                            | -0.4 (0.5)                   | 4.4 (0.5)  | -5.0 (3.6)  | 33.3 (3.9) |
| Year $>$ 2007                                               | 0 (0.4)                      | 3.5 (0.6)  | 0.9 (3.2)   | 31.4 (2.9) |
| <b>Mean</b>                                                 | ME                           | MAE        | MRE         | MARE       |
| Year $\leq$ 2007                                            | 1 (0.5)                      | 5.6 (0.5)  | -23.2 (6.6) | 47.8 (6)   |
| Year $>$ 2007                                               | -0.4 (0.1)                   | 2.4 (0.1)  | -32.1 (1.5) | 50.1 (1.5) |



percentage of estimates obtained from the full dataset that are falling below or above the 90% uncertainty intervals obtained from the training set only. Overall, these results indicate that the model performance is not substantially different for  ${}_{10}q_{15}$  than when applied to the other age groups.

Table S5 – Validation measures based on the comparison between estimates based on the training and full data set.

|                                                             |      | ${}_{10}q_{15}$ (this study) |      |     |        |      |     |         |         |  |
|-------------------------------------------------------------|------|------------------------------|------|-----|--------|------|-----|---------|---------|--|
|                                                             |      | Mean                         |      |     | Median |      |     |         |         |  |
|                                                             |      | MRE                          | MARE | S   | MRE    | MARE | S   | % below | % above |  |
| $\kappa = 0.5$                                              |      |                              |      |     |        |      |     |         |         |  |
|                                                             | 2007 | -3.4                         | 6.4  | 0.4 | -0.3   | 1.6  | 0.4 | 3.3     | 0.0     |  |
|                                                             | 2012 | -6.8                         | 14.9 | 0.9 | -0.8   | 8.1  | 0.8 | 4.9     | 4.9     |  |
| $\kappa = 0.8$                                              |      |                              |      |     |        |      |     |         |         |  |
|                                                             | 2007 | -3.4                         | 6.3  | 0.4 | -0.3   | 1.6  | 0.4 | 3.3     | 0.0     |  |
|                                                             | 2012 | -5.9                         | 13.7 | 0.8 | -0.8   | 7.9  | 0.8 | 4.9     | 4.9     |  |
| ${}_{5}q_0$ (Sc: Alkema and New 2014) - $\kappa = 0.5$      |      |                              |      |     |        |      |     |         |         |  |
|                                                             |      | Mean                         |      |     | Median |      |     |         |         |  |
|                                                             |      | MRE                          | MARE | S   | MRE    | MARE | S   | % below | % above |  |
|                                                             | 2000 | -2.4                         | 4.4  | 1.2 | -4.1   | 9    | 1.6 | 3.8     | 5.1     |  |
|                                                             | 2005 | -6.1                         | 8.1  | 1.2 | -8.9   | 14.7 | 1.6 | 7.7     | 1.3     |  |
| ${}_{10}q_5$ (Sc: Masquelier et al., 2018) - $\kappa = 0.5$ |      |                              |      |     |        |      |     |         |         |  |
|                                                             |      | Mean                         |      |     | Median |      |     |         |         |  |
|                                                             |      | MRE                          | MARE | S   | MRE    | MARE | S   | % below | % above |  |
|                                                             | 2000 | -4.1                         | 11.5 | 0.6 | -1.1   | 6.0  | 0.4 | 1.9     | 5.6     |  |
|                                                             | 2007 | -14.7                        | 23.0 | 1.0 | -6.6   | 14.4 | 0.9 | 5.6     | 3.7     |  |

## 2.8 DERIVING ESTIMATES FOR COUNTRIES WITH INSUFFICIENT DATA

In 37 countries with insufficient data sources, we estimated youth mortality based on the relationship observed between U5MR and the probability  ${}_{10}q_{15}$  in countries for which the B3 model was used. Our approach is similar to that used to exclude certain surveys on the basis of the plausibility of mortality age patterns (section 1.2.2), except that we can use the results of the B3 model rather than the standard constructed from vital registration and HDSS data. The B3 estimates offer more insights into the diversity of regional patterns than the standard mortality age pattern described above. We removed the quadratic term and fit a varying-slope and varying-intercept model to predict  $\log({}_{10}q_{15})$  from  $\log({}_5q_0)$ , allowing the slope of the  $\log({}_5q_0)$  variable to vary by region [40]:

$$\log({}_{10}q_{15})_i = N(\alpha_{j[i]} + \beta_{j[i]}\log({}_5q_0)_i, \sigma_y^2) \text{ for } i = 1, \dots, n \text{ country-year estimates.} \quad (13)$$

$$\begin{pmatrix} \alpha_j \\ \beta_j \end{pmatrix} = N \left( \begin{pmatrix} \mu_\alpha \\ \mu_\beta \end{pmatrix}, \begin{pmatrix} \sigma_\alpha^2 & \rho\sigma_\alpha\sigma_\beta \\ \rho\sigma_\alpha\sigma_\beta & \sigma_\beta^2 \end{pmatrix} \right) \text{ for } j = 1, \dots, J \text{ UNICEF regions.}$$

The fixed effect parameter estimates are presented in Table S6 and Figure S4 displays the model predictions for different regions (using the UNICEF classification), for the range of U5MR estimates observed in each region in the period 1990-2019. We combined the median value of U5MR estimates from UN IGME for each country-year between 1990 and 2019 with the fixed and random effects of this model to obtain a point estimate  $\log({}_{10}q_{15})$ . We did not account for uncertainty quantified by  $\sigma_y^2$  or the uncertainty around the U5MR estimates to make these predictions.

For a given level of child mortality, there are significant regional differences in the expected levels of the  ${}_{10}q_{15}$  probability. For example, for a level of 50 per thousand, the predicted  ${}_{10}q_{15}$  probability will be 11 per thousand in Eastern Europe and Central Asia, compared to 16 in East Asia and the Pacific, and up to 24 in Eastern and Southern Africa. The estimates for data-poor countries are to be considered with caution. They will be revised in future iterations as the database develops, by making greater use of non-standard surveys for these countries (upon data availability). This modelling covers a very small share of the world population aged 15-24 since these 37 countries represent only 4.9% of the population in this age group<sup>18</sup>.

---

<sup>18</sup>In Eswatini, we excluded all data series and derived  ${}_{10}q_{15}$  from  ${}_5q_0$  as our database did not include any data point after 2007 and the period after the scale-up of ART treatment was not well represented. Estimates from the 2012 Intercensal survey and the 2017 census will be used when they are publicly available.

Table S6 – *Fixed effect parameter estimates from the varying slope and varying intercept model*

|                | log <sub>10</sub> q <sub>15</sub> |
|----------------|-----------------------------------|
| logU5MR        | 0.473***<br>(0.030)               |
| Constant       | -2.774***<br>(0.189)              |
| <i>N</i>       | 4,770                             |
| Log Likelihood | -1,576.103                        |
| AIC            | 3,164.206                         |
| BIC            | 3,203.027                         |

\*p < .05; \*\*p < .01; \*\*\*p < .001

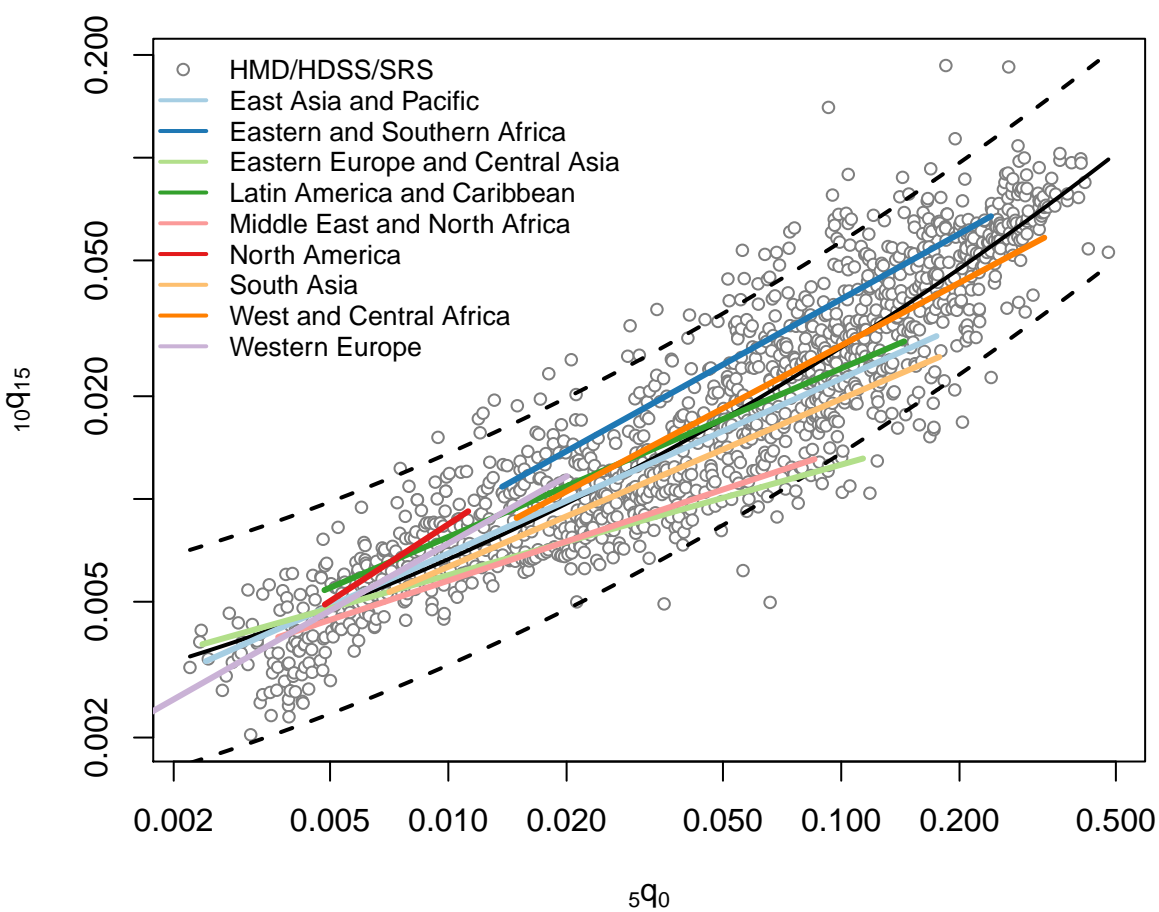

Figure S4 – *Relationship between  ${}_5q_0$  and  ${}_{10}q_{15}$  in the life tables from HMD, HDSS, SRS in India and VR in Mauritius, and predictions from the varying slope and varying intercept model.*

## 2.9 CALCULATION OF THE ANNUAL RATE OF REDUCTION

The annual rate of reduction (in %) between two years,  $y_1$  and  $y_2$  ( $y_1 < y_2$ ), is computed as:

$$\text{ARR} = 100 * \frac{\log\left(\frac{{}_{10}q_{15}(y_2)}{{}_{10}q_{15}(y_1)}\right)}{y_2 - y_1}.$$

## 3 LIST OF DATA SERIES

Table S7 lists all countries included in the analysis, their region, the different data series included in the mortality database and indicates the type of data collection. Some data series were included in the database but excluded from the statistical model. The ‘Inclusion’ column identifies these series with a 0. Excluded series refer to country-years with vital registration data until 1989 (as these vital statistics were not used for modelling trends from 1990), incomplete vital registration data or surveys and censuses with implausible age patterns. This column is also set to ‘0’ for countries for which trends in  ${}_{10}q_{15}$  were modelled based on trends in U5MR (because of insufficient data series).

| Country             | Region                          | Series                                                 | Years     | Inclusion | Type                       |
|---------------------|---------------------------------|--------------------------------------------------------|-----------|-----------|----------------------------|
| Afghanistan         | South Asia                      | Census                                                 | 1979      | 1         | Household Deaths           |
|                     |                                 | Afghanistan Mortality Survey (excluding South Zone)    | 2010      | 1         | Household Deaths           |
|                     |                                 | Afghanistan Mortality Survey (excluding South Zone)    | 2010      | 1         | Sibling survival histories |
|                     |                                 | Demographic and Health Survey                          | 2015      | 1         | Sibling survival histories |
| Albania             | Eastern Europe and Central Asia | Census                                                 | 2011      | 1         | Household Deaths           |
|                     |                                 | WHO VR (recalculated - unadjusted)                     | 1980-2012 | 0         | Vital Registration         |
|                     |                                 | WHO VR (recalculated - unadjusted)                     | 1989-2020 | 1         | Vital Registration         |
| Algeria             | Middle East and North Africa    | Demographic Survey                                     | 1970      | 1         | Household Deaths           |
|                     |                                 | WHO VR (recalculated - unadjusted)                     | 1980-1986 | 0         | Vital Registration         |
|                     |                                 | WHO VR (recalculated - unadjusted)                     | 1986-2020 | 1         | Vital Registration         |
| Andorra             | Western Europe                  | WHO VR (recalculated - unadjusted)                     | 1994-2019 | 0         | Vital Registration         |
| Angola              | Eastern and Southern Africa     | Census                                                 | 2014      | 0         | Household Deaths           |
|                     |                                 | Inquerito de Indicadores Multiplos e de Saude          | 2016      | 0         | Sibling survival histories |
| Antigua and Barbuda | Latin America and Caribbean     | WHO VR (recalculated - unadjusted)                     | 1961-1996 | 0         | Vital Registration         |
|                     |                                 | WHO VR (recalculated - unadjusted)                     | 1996-2018 | 1         | Vital Registration         |
| Argentina           | Latin America and Caribbean     | WHO VR (recalculated - unadjusted)                     | 1966-1989 | 0         | Vital Registration         |
|                     |                                 | WHO VR (recalculated - unadjusted)                     | 1989-2019 | 1         | Vital Registration         |
| Armenia             | Eastern Europe and Central Asia | WHO VR (recalculated - unadjusted)                     | 1981-1989 | 0         | Vital Registration         |
|                     |                                 | WHO VR (recalculated - unadjusted)                     | 1989-2019 | 1         | Vital Registration         |
| Australia           | East Asia and Pacific           | WHO VR (recalculated - unadjusted)                     | 1950-1989 | 0         | Vital Registration         |
|                     |                                 | WHO VR (recalculated - unadjusted)                     | 1989-2019 | 1         | Vital Registration         |
| Austria             | Western Europe                  | WHO VR (recalculated - unadjusted)                     | 1950-1989 | 0         | Vital Registration         |
|                     |                                 | WHO VR (recalculated - unadjusted)                     | 1989-2018 | 1         | Vital Registration         |
| Azerbaijan          | Eastern Europe and Central Asia | WHO VR (recalculated - unadjusted)                     | 1981-2018 | 0         | Vital Registration         |
|                     |                                 | WHO VR (recalculated - adjusted for incompleteness)    | 1989-2018 | 1         | Vital Registration         |
| Bahamas             | Latin America and Caribbean     | WHO VR (recalculated - unadjusted)                     | 1969-2016 | 0         | Vital Registration         |
|                     |                                 | WHO VR (recalculated - adjusted for incompleteness)    | 1990-2016 | 1         | Vital Registration         |
| Bahrain             | Middle East and North Africa    | WHO VR (recalculated - unadjusted)                     | 1980-1989 | 0         | Vital Registration         |
|                     |                                 | WHO VR (recalculated - unadjusted)                     | 1989-2015 | 1         | Vital Registration         |
| Bangladesh          | South Asia                      | Maternal Health Services and Maternal Mortality Survey | 2001      | 0         | Sibling survival histories |
|                     |                                 | World Health Survey                                    | 2003      | 1         | Sibling survival histories |
|                     |                                 | Census                                                 | 2011      | 1         | Household Deaths           |
|                     |                                 | SVR (from published reports)                           | 1981-2016 | 1         | Sample Vital Registration  |
| Barbados            | Latin America and Caribbean     | WHO VR (recalculated - unadjusted)                     | 1955-1989 | 0         | Vital Registration         |
|                     |                                 | WHO VR (recalculated - unadjusted)                     | 1989-2014 | 1         | Vital Registration         |
| Belarus             | Eastern Europe and Central Asia | WHO VR (recalculated - unadjusted)                     | 1959-1989 | 0         | Vital Registration         |
|                     |                                 | WHO VR (recalculated - unadjusted)                     | 1989-2019 | 1         | Vital Registration         |
| Belgium             | Western Europe                  | WHO VR (recalculated - unadjusted)                     | 1950-1989 | 0         | Vital Registration         |
|                     |                                 | WHO VR (recalculated - unadjusted)                     | 1989-2019 | 1         | Vital Registration         |
| Belize              | Latin America and Caribbean     | WHO VR (recalculated - unadjusted)                     | 1964-2000 | 0         | Vital Registration         |
|                     |                                 | WHO VR (recalculated - unadjusted)                     | 2000-2019 | 1         | Vital Registration         |
|                     |                                 | WHO VR (recalculated - adjusted for incompleteness)    | 1991-2000 | 1         | Vital Registration         |
|                     |                                 | WHO VR (recalculated - adjusted for incompleteness)    | 2000-2019 | 0         | Vital Registration         |
| Benin               | West and Central Africa         | Demographic and Health Survey                          | 1996      | 1         | Sibling survival histories |
|                     |                                 | Demographic and Health Survey                          | 2006      | 1         | Sibling survival histories |
|                     |                                 | Multiple Indicator Cluster Survey                      | 2014      | 1         | Sibling survival histories |

| Country                          | Region                          | Series                                              | Years     | Inclusion | Type                       |
|----------------------------------|---------------------------------|-----------------------------------------------------|-----------|-----------|----------------------------|
|                                  |                                 | Demographic and Health Survey                       | 2018      | 1         | Sibling survival histories |
| Bhutan                           | South Asia                      | National Health Survey                              | 1994      | 1         | Household Deaths           |
|                                  |                                 | National Health Survey                              | 2000      | 1         | Household Deaths           |
|                                  |                                 | Census                                              | 2005      | 1         | Household Deaths           |
|                                  |                                 | Multiple Indicator Cluster Survey                   | 2010      | 0         | Sibling survival histories |
|                                  |                                 | National Health Survey                              | 2012      | 1         | Household Deaths           |
| Bolivia (Plurinational State of) | Latin America and Caribbean     | National Demographic Survey                         | 1980      | 1         | Household Deaths           |
|                                  |                                 | Census                                              | 1992      | 1         | Household Deaths           |
|                                  |                                 | Demographic and Health Survey                       | 1993-1994 | 1         | Sibling survival histories |
|                                  |                                 | Census                                              | 2001      | 1         | Household Deaths           |
|                                  |                                 | Demographic and Health Survey                       | 2003      | 1         | Sibling survival histories |
|                                  |                                 | Demographic and Health Survey                       | 2008      | 1         | Sibling survival histories |
|                                  |                                 | Census                                              | 2012      | 0         | Household Deaths           |
| Bosnia and Herzegovina           | Eastern Europe and Central Asia | World Health Survey                                 | 2003      | 0         | Sibling survival histories |
|                                  |                                 | WHO VR (recalculated - unadjusted)                  | 1985-1989 | 0         | Vital Registration         |
|                                  |                                 | WHO VR (recalculated - unadjusted)                  | 1989-2017 | 1         | Vital Registration         |
| Botswana                         | Eastern and Southern Africa     | Census                                              | 1981      | 1         | Household Deaths           |
|                                  |                                 | Census                                              | 1991      | 1         | Household Deaths           |
|                                  |                                 | Demographic Survey                                  | 1998      | 1         | Household Deaths           |
|                                  |                                 | Census                                              | 2001      | 1         | Household Deaths           |
|                                  |                                 | Demographic Survey                                  | 2006      | 1         | Household Deaths           |
|                                  |                                 | Census                                              | 2011      | 1         | Household Deaths           |
| Brazil                           | Latin America and Caribbean     | Demographic and Health Survey                       | 1996      | 1         | Sibling survival histories |
|                                  |                                 | Census                                              | 2010      | 1         | Household Deaths           |
|                                  |                                 | WHO VR (recalculated - unadjusted)                  | 1979-1989 | 0         | Vital Registration         |
|                                  |                                 | WHO VR (recalculated - unadjusted)                  | 1989-2018 | 1         | Vital Registration         |
| Brunei Darussalam                | East Asia and Pacific           | WHO VR (recalculated - unadjusted)                  | 1982-2020 | 0         | Vital Registration         |
|                                  |                                 | WHO VR (recalculated - adjusted for incompleteness) | 1991-2020 | 1         | Vital Registration         |
| Bulgaria                         | Eastern Europe and Central Asia | WHO VR (recalculated - unadjusted)                  | 1950-1989 | 0         | Vital Registration         |
|                                  |                                 | WHO VR (recalculated - unadjusted)                  | 1989-2020 | 1         | Vital Registration         |
| Burkina Faso                     | West and Central Africa         | Census                                              | 1985      | 1         | Household Deaths           |
|                                  |                                 | Census                                              | 1996      | 1         | Household Deaths           |
|                                  |                                 | Demographic and Health Survey                       | 1998-1999 | 1         | Sibling survival histories |
|                                  |                                 | Demographic and Health Survey                       | 2003      | 1         | Sibling survival histories |
|                                  |                                 | World Health Survey                                 | 2003      | 1         | Sibling survival histories |
|                                  |                                 | Census                                              | 2006      | 1         | Household Deaths           |
|                                  |                                 | Demographic and Health Survey                       | 2010      | 1         | Sibling survival histories |
| Burundi                          | Eastern and Southern Africa     | Population Survey                                   | 1965      | 1         | Household Deaths           |
|                                  |                                 | Demographic Survey                                  | 1970      | 1         | Household Deaths           |
|                                  |                                 | Demographic Survey                                  | 2002      | 1         | Sibling survival histories |
|                                  |                                 | Census                                              | 2008      | 1         | Household Deaths           |
|                                  |                                 | Demographic and Health Survey                       | 2010      | 1         | Sibling survival histories |
|                                  |                                 | Demographic and Health Survey                       | 2017      | 1         | Sibling survival histories |
| Cabo Verde                       | West and Central Africa         | Census                                              | 2000      | 1         | Household Deaths           |
|                                  |                                 | Census                                              | 2010      | 1         | Household Deaths           |
|                                  |                                 | WHO VR (recalculated - unadjusted)                  | 1980-1986 | 0         | Vital Registration         |

| Country                  | Region                      | Series                                                | Years       | Inclusion | Type                       |
|--------------------------|-----------------------------|-------------------------------------------------------|-------------|-----------|----------------------------|
|                          |                             | WHO VR (recalculated - unadjusted)                    | 1990-2014   | 1         | Vital Registration         |
| Cambodia                 | East Asia and Pacific       | Demographic and Health Survey                         | 2000        | 1         | Sibling survival histories |
|                          |                             | Demographic and Health Survey                         | 2005        | 1         | Sibling survival histories |
|                          |                             | Demographic and Health Survey                         | 2010        | 1         | Sibling survival histories |
|                          |                             | Demographic and Health Survey                         | 2014        | 1         | Sibling survival histories |
| Cameroon                 | West and Central Africa     | Census                                                | 1976        | 1         | Household Deaths           |
|                          |                             | Census                                                | 1987        | 1         | Household Deaths           |
|                          |                             | Demographic and Health Survey                         | 1998        | 1         | Sibling survival histories |
|                          |                             | Demographic and Health Survey                         | 2004        | 1         | Sibling survival histories |
|                          |                             | Census                                                | 2005        | 1         | Household Deaths           |
|                          |                             | Demographic and Health Survey                         | 2011        | 1         | Sibling survival histories |
|                          |                             | Demographic and Health Survey                         | 2018        | 1         | Sibling survival histories |
| Canada                   | North America               | WHO VR (recalculated - unadjusted)                    | 1950-1989   | 0         | Vital Registration         |
|                          |                             | WHO VR (recalculated - unadjusted)                    | 1989-2019   | 1         | Vital Registration         |
| Central African Republic | West and Central Africa     | Survey                                                | 1959-1960   | 1         | Household Deaths           |
|                          |                             | Census                                                | 1988        | 1         | Household Deaths           |
|                          |                             | Demographic and Health Survey                         | 1994-1995   | 1         | Sibling survival histories |
|                          |                             | Census                                                | 2003        | 1         | Household Deaths           |
| Chad                     | West and Central Africa     | Demographic and Health Survey                         | 1996-1997   | 1         | Sibling survival histories |
|                          |                             | World Health Survey                                   | 2003        | 0         | Sibling survival histories |
|                          |                             | Demographic and Health Survey                         | 2004        | 1         | Sibling survival histories |
|                          |                             | Census                                                | 2009        | 1         | Household Deaths           |
|                          |                             | Demographic and Health Survey                         | 2014-2015   | 1         | Sibling survival histories |
| Chile                    | Latin America and Caribbean | WHO VR (recalculated - unadjusted)                    | 1955-1989   | 0         | Vital Registration         |
|                          |                             | WHO VR (recalculated - unadjusted)                    | 1989-2016   | 1         | Vital Registration         |
| China                    | East Asia and Pacific       | Adjusted Census Deaths                                | (1964-1982) | 1         | Household Deaths           |
|                          |                             | Adjusted Census Deaths                                | (1982-1990) | 1         | Household Deaths           |
|                          |                             | Adjusted Census Deaths                                | (1990-2000) | 1         | Household Deaths           |
|                          |                             | Adjusted Census Deaths                                | (1999-2000) | 1         | Household Deaths           |
|                          |                             | Adjusted Census Deaths                                | (2000-2010) | 1         | Household Deaths           |
|                          |                             | Population 1% Sample Survey                           | 2005        | 1         | Household Deaths           |
|                          |                             | China 1987 One-per-Hundred National Population Survey | 1987        | 1         | Household Deaths           |
|                          |                             | China 1995 One-percent Sample Survey                  | 1995        | 1         | Household Deaths           |
|                          |                             | World Health Survey                                   | 2003        | 0         | Sibling survival histories |
|                          |                             | China 2007 Annual Population Change Survey            | 2007        | 1         | Household Deaths           |
|                          |                             | China 2008 Annual Population Change Survey            | 2008        | 1         | Household Deaths           |
|                          |                             | China 2009 Annual Population Change Survey            | 2009        | 0         | Household Deaths           |
|                          |                             | China CDC Surveillance surveys                        | 2013        | 0         | Sample Vital Registration  |
|                          |                             | China CDC Surveillance surveys                        | 2013        | 1         | Sample Vital Registration  |
|                          |                             | Population Sample Survey                              | 2015        | 0         | Household Deaths           |
| Colombia                 | Latin America and Caribbean | Census                                                | 2005        | 0         | Household Deaths           |
|                          |                             | Demographic and Health Survey                         | 2015        | 1         | Sibling survival histories |
|                          |                             | WHO VR (recalculated - unadjusted)                    | 1955-1993   | 0         | Vital Registration         |
|                          |                             | WHO VR (recalculated - unadjusted)                    | 1993-2020   | 1         | Vital Registration         |
| Comoros                  | Eastern and Southern Africa | Census                                                | 1958        | 1         | Household Deaths           |
|                          |                             | Census                                                | 1980        | 1         | Household Deaths           |
|                          |                             | Census                                                | 2003        | 1         | Household Deaths           |

| Country                               | Region                          | Series                                              | Years     | Inclusion | Type                       |
|---------------------------------------|---------------------------------|-----------------------------------------------------|-----------|-----------|----------------------------|
|                                       |                                 | World Health Survey                                 | 2003      | 0         | Sibling survival histories |
|                                       |                                 | Demographic and Health Survey                       | 2012      | 1         | Sibling survival histories |
| Congo                                 | West and Central Africa         | Census                                              | 1984      | 0         | Household Deaths           |
|                                       |                                 | World Health Survey                                 | 2003      | 0         | Sibling survival histories |
|                                       |                                 | Demographic and Health Survey                       | 2005      | 1         | Sibling survival histories |
|                                       |                                 | Demographic and Health Survey                       | 2011-2012 | 1         | Sibling survival histories |
|                                       |                                 | Multiple Indicator Cluster Survey                   | 2015      | 1         | Sibling survival histories |
| Cook Islands                          | East Asia and Pacific           | WHO VR (recalculated - unadjusted)                  | 1980-1987 | 0         | Vital Registration         |
|                                       |                                 | WHO VR (recalculated - unadjusted)                  | 1987-2010 | 1         | Vital Registration         |
| Costa Rica                            | Latin America and Caribbean     | WHO VR (recalculated - unadjusted)                  | 1956-1989 | 0         | Vital Registration         |
|                                       |                                 | WHO VR (recalculated - unadjusted)                  | 1989-2020 | 1         | Vital Registration         |
| Côte d'Ivoire                         | West and Central Africa         | Demographic and Health Survey                       | 1994      | 1         | Sibling survival histories |
|                                       |                                 | World Health Survey                                 | 2003      | 1         | Sibling survival histories |
|                                       |                                 | AIDS Indicator Survey                               | 2005      | 1         | Sibling survival histories |
|                                       |                                 | Demographic and Health Survey                       | 2011-2012 | 1         | Sibling survival histories |
| Croatia                               | Eastern Europe and Central Asia | Census                                              | 2011      | 1         | Household Deaths           |
|                                       |                                 | WHO VR (recalculated - unadjusted)                  | 1982-1989 | 0         | Vital Registration         |
|                                       |                                 | WHO VR (recalculated - unadjusted)                  | 1989-2019 | 1         | Vital Registration         |
| Cuba                                  | Latin America and Caribbean     | WHO VR (recalculated - unadjusted)                  | 1964-1989 | 0         | Vital Registration         |
|                                       |                                 | WHO VR (recalculated - unadjusted)                  | 1989-2020 | 1         | Vital Registration         |
| Cyprus                                | Western Europe                  | WHO VR (recalculated - unadjusted)                  | 1980-2018 | 0         | Vital Registration         |
|                                       |                                 | WHO VR (recalculated - unadjusted)                  | 1989-2001 | 1         | Vital Registration         |
|                                       |                                 | WHO VR (recalculated - adjusted for incompleteness) | 2001-2018 | 1         | Vital Registration         |
| Czechia                               | Western Europe                  | WHO VR (recalculated - unadjusted)                  | 1950-1989 | 0         | Vital Registration         |
|                                       |                                 | WHO VR (recalculated - unadjusted)                  | 1989-2020 | 1         | Vital Registration         |
| Democratic People's Republic of Korea | East Asia and Pacific           | Census                                              | 1993      | 0         | Household Deaths           |
|                                       |                                 | Census                                              | 2008      | 0         | Household Deaths           |
| Democratic Republic of the Congo      | West and Central Africa         | SPS                                                 | 1955-1957 | 1         | Household Deaths           |
|                                       |                                 | Demographic and Health Survey                       | 2007      | 1         | Sibling survival histories |
|                                       |                                 | Demographic and Health Survey                       | 2013-2014 | 1         | Sibling survival histories |
| Denmark                               | Western Europe                  | WHO VR (recalculated - unadjusted)                  | 1951-1989 | 0         | Vital Registration         |
|                                       |                                 | WHO VR (recalculated - unadjusted)                  | 1989-2020 | 1         | Vital Registration         |
| Dominica                              | Latin America and Caribbean     | WHO VR (recalculated - unadjusted)                  | 1961-1985 | 0         | Vital Registration         |
|                                       |                                 | WHO VR (recalculated - unadjusted)                  | 1985-2016 | 1         | Vital Registration         |
| Dominican Republic                    | Latin America and Caribbean     | Demographic and Health Survey                       | 2002      | 1         | Sibling survival histories |
|                                       |                                 | World Health Survey                                 | 2003      | 1         | Sibling survival histories |
|                                       |                                 | Demographic and Health Survey                       | 2007      | 1         | Sibling survival histories |
|                                       |                                 | Census                                              | 2010      | 1         | Household Deaths           |
|                                       |                                 | Demographic and Health Survey                       | 2013      | 1         | Household Deaths           |
|                                       |                                 | WHO VR (recalculated - unadjusted)                  | 1958-2020 | 0         | Vital Registration         |
| Ecuador                               | Latin America and Caribbean     | World Health Survey                                 | 2003      | 1         | Sibling survival histories |
|                                       |                                 | National Health and Nutrition Survey                | 2012      | 1         | Household Deaths           |
|                                       |                                 | WHO VR (recalculated - unadjusted)                  | 1968-2018 | 0         | Vital Registration         |
|                                       |                                 | WHO VR (recalculated - unadjusted)                  | 1990-2002 | 1         | Vital Registration         |
| Egypt                                 | Middle East and North Africa    | WHO VR (recalculated - unadjusted)                  | 1955-1989 | 0         | Vital Registration         |
|                                       |                                 | WHO VR (recalculated - unadjusted)                  | 1989-2020 | 1         | Vital Registration         |
| El Salvador                           | Latin America and Caribbean     | Census                                              | 1992      | 1         | Household Deaths           |



| Country           | Region                          | Series                                              | Years     | Inclusion | Type                       |
|-------------------|---------------------------------|-----------------------------------------------------|-----------|-----------|----------------------------|
|                   |                                 | Census                                              | 2007      | 0         | Household Deaths           |
|                   |                                 | WHO VR (recalculated - unadjusted)                  | 1958-1989 | 0         | Vital Registration         |
|                   |                                 | WHO VR (recalculated - unadjusted)                  | 1989-2017 | 1         | Vital Registration         |
| Equatorial Guinea | West and Central Africa         | Census                                              | 1994      | 0         | Household Deaths           |
| Estonia           | Western Europe                  | Census                                              | 2011-2012 | 1         | Household Deaths           |
|                   |                                 | WHO VR (recalculated - unadjusted)                  | 1959-1989 | 0         | Vital Registration         |
|                   |                                 | WHO VR (recalculated - unadjusted)                  | 1989-2020 | 1         | Vital Registration         |
| Eswatini          | Eastern and Southern Africa     | Census                                              | 1997      | 0         | Household Deaths           |
|                   |                                 | World Health Survey                                 | 2003      | 0         | Sibling survival histories |
|                   |                                 | Demographic and Health Survey                       | 2006-2007 | 0         | Sibling survival histories |
|                   |                                 | Census                                              | 2007      | 0         | Household Deaths           |
| Ethiopia          | Eastern and Southern Africa     | Demographic and Health Survey                       | 2000      | 1         | Sibling survival histories |
|                   |                                 | World Health Survey                                 | 2003      | 1         | Sibling survival histories |
|                   |                                 | Demographic and Health Survey                       | 2005      | 1         | Sibling survival histories |
|                   |                                 | Census                                              | 2007      | 1         | Household Deaths           |
|                   |                                 | Demographic and Health Survey                       | 2011      | 1         | Sibling survival histories |
|                   |                                 | Demographic and Health Survey                       | 2016      | 1         | Sibling survival histories |
| Fiji              | East Asia and Pacific           | WHO VR (recalculated - unadjusted)                  | 1978-2000 | 0         | Vital Registration         |
|                   |                                 | WHO VR (recalculated - unadjusted)                  | 2000-2018 | 1         | Vital Registration         |
| Finland           | Western Europe                  | WHO VR (recalculated - unadjusted)                  | 1950-1989 | 0         | Vital Registration         |
|                   |                                 | WHO VR (recalculated - unadjusted)                  | 1989-2020 | 1         | Vital Registration         |
| France            | Western Europe                  | WHO VR (recalculated - unadjusted)                  | 1950-1989 | 0         | Vital Registration         |
|                   |                                 | WHO VR (recalculated - unadjusted)                  | 1989-2019 | 1         | Vital Registration         |
| Gabon             | West and Central Africa         | Demographic and Health Survey                       | 2000      | 1         | Sibling survival histories |
|                   |                                 | Demographic and Health Survey                       | 2012      | 1         | Sibling survival histories |
| Gambia            | West and Central Africa         | Census                                              | 2013      | 0         | Household Deaths           |
|                   |                                 | Demographic and Health Survey                       | 2013      | 0         | Sibling survival histories |
| Georgia           | Eastern Europe and Central Asia | World Health Survey                                 | 2003      | 0         | Sibling survival histories |
|                   |                                 | WHO VR (recalculated - unadjusted)                  | 1981-2002 | 0         | Vital Registration         |
|                   |                                 | WHO VR (recalculated - unadjusted)                  | 2002-2019 | 1         | Vital Registration         |
|                   |                                 | WHO VR (recalculated - adjusted for incompleteness) | 1989-2002 | 1         | Vital Registration         |
|                   |                                 | WHO VR (recalculated - adjusted for incompleteness) | 2002-2019 | 0         | Vital Registration         |
| Germany           | Western Europe                  | WHO VR (recalculated - unadjusted)                  | 1969-1989 | 0         | Vital Registration         |
|                   |                                 | WHO VR (recalculated - unadjusted)                  | 1989-2019 | 1         | Vital Registration         |
| Ghana             | West and Central Africa         | World Health Survey                                 | 2003      | 1         | Sibling survival histories |
|                   |                                 | Maternal Health Survey                              | 2007      | 1         | Sibling survival histories |
|                   |                                 | Census                                              | 2010      | 1         | Household Deaths           |
|                   |                                 | Demographic and Health Survey                       | 2017      | 1         | Household deaths           |
| Greece            | Western Europe                  | WHO VR (recalculated - unadjusted)                  | 1956-1989 | 0         | Vital Registration         |
|                   |                                 | WHO VR (recalculated - unadjusted)                  | 1989-2019 | 1         | Vital Registration         |
| Grenada           | Latin America and Caribbean     | WHO VR (recalculated - unadjusted)                  | 1985-2001 | 0         | Vital Registration         |
|                   |                                 | WHO VR (recalculated - unadjusted)                  | 2001-2019 | 1         | Vital Registration         |
|                   |                                 | WHO VR (recalculated - adjusted for incompleteness) | 1989-2001 | 1         | Vital Registration         |
|                   |                                 | WHO VR (recalculated - adjusted for incompleteness) | 2001-2019 | 0         | Vital Registration         |
| Guatemala         | Latin America and Caribbean     | Demographic and Health Survey                       | 1995      | 1         | Sibling survival histories |
|                   |                                 | WHO VR (recalculated - unadjusted)                  | 1958-1989 | 0         | Vital Registration         |

| Country                            | Region                       | Series                                              | Years                        | Inclusion                                                | Type                       |
|------------------------------------|------------------------------|-----------------------------------------------------|------------------------------|----------------------------------------------------------|----------------------------|
|                                    |                              | WHO VR (recalculated - unadjusted)                  | 1989-2018                    | 1                                                        | Vital Registration         |
| Guinea                             | West and Central Africa      | Census                                              | 1983                         | 0                                                        | Household Deaths           |
|                                    |                              | Census                                              | 1996                         | 1                                                        | Household Deaths           |
|                                    |                              | Demographic and Health Survey                       | 1999                         | 1                                                        | Sibling survival histories |
|                                    |                              | Demographic and Health Survey                       | 2005                         | 1                                                        | Sibling survival histories |
|                                    |                              | Demographic and Health Survey                       | 2012                         | 1                                                        | Sibling survival histories |
|                                    |                              | Census                                              | 2014                         | 1                                                        | Household Deaths           |
| Guinea-Bissau                      | West and Central Africa      | Census                                              | 2009                         | 0                                                        | Household Deaths           |
|                                    |                              | Multiple Indicator Cluster Survey                   | 2014                         | 0                                                        | Sibling survival histories |
| Guyana                             | Latin America and Caribbean  | Census                                              | 2012                         | 0                                                        | Household Deaths           |
|                                    |                              | WHO VR (recalculated - unadjusted)                  | 1977-1989                    | 0                                                        | Vital Registration         |
|                                    |                              | WHO VR (recalculated - unadjusted)                  | 1989-2015                    | 1                                                        | Vital Registration         |
| Haiti                              | Latin America and Caribbean  | Census                                              | 1971                         | 0                                                        | Household Deaths           |
|                                    |                              | Demographic and Health Survey                       | 2000                         | 1                                                        | Sibling survival histories |
|                                    |                              | Demographic and Health Survey                       | 2005-2006                    | 1                                                        | Sibling survival histories |
|                                    |                              | Demographic and Health Survey                       | 2017                         | 1                                                        | Sibling survival histories |
|                                    |                              | WHO VR (recalculated - unadjusted)                  | 1980-2005                    | 0                                                        | Vital Registration         |
| Honduras                           | Latin America and Caribbean  | National Demographic Survey                         | 1983                         | 0                                                        | Household Deaths           |
|                                    |                              | Census                                              | 2001                         | 0                                                        | Household Deaths           |
|                                    |                              | Census                                              | 2013                         | 0                                                        | Household Deaths           |
|                                    |                              | WHO VR (recalculated - unadjusted)                  | 1966-2014                    | 0                                                        | Vital Registration         |
| Hungary                            | Western Europe               | WHO VR (recalculated - unadjusted)                  | 1950-1989                    | 0                                                        | Vital Registration         |
|                                    |                              | WHO VR (recalculated - unadjusted)                  | 1989-2019                    | 1                                                        | Vital Registration         |
| Iceland                            | Western Europe               | WHO VR (recalculated - unadjusted)                  | 1950-1989                    | 0                                                        | Vital Registration         |
|                                    |                              | WHO VR (recalculated - unadjusted)                  | 1989-2020                    | 1                                                        | Vital Registration         |
| India                              | South Asia                   | World Health Survey                                 | 2003                         | 1                                                        | Sibling survival histories |
|                                    |                              | Sample Registration System                          | 2019                         | 0                                                        | Sample Vital Registration  |
|                                    |                              | Sample Registration System                          | 1968-2016                    | 1                                                        | Sample Vital Registration  |
| Indonesia                          | East Asia and Pacific        | National Socio-economic Survey                      | 1964-1965                    | 1                                                        | Household Deaths           |
|                                    |                              | Demographic and Health Survey                       | 1994                         | 1                                                        | Sibling survival histories |
|                                    |                              | Demographic and Health Survey                       | 1997                         | 0                                                        | Sibling survival histories |
|                                    |                              | Demographic and Health Survey                       | 2002-2003                    | 1                                                        | Sibling survival histories |
|                                    |                              | Demographic and Health Survey                       | 2007                         | 1                                                        | Sibling survival histories |
|                                    |                              | Census                                              | 2010                         | 1                                                        | Household Deaths           |
| Iran (Islamic Republic of)         | Middle East and North Africa | Demographic and Health Survey                       | 2012                         | 1                                                        | Sibling survival histories |
|                                    |                              | Population Growth Survey                            | 1973-1976                    | 1                                                        | Sibling survival histories |
|                                    |                              | Census                                              | 1976                         | 1                                                        | Household Deaths           |
|                                    |                              | Census                                              | 1986                         | 1                                                        | Household Deaths           |
|                                    |                              | Census                                              | 1991                         | 1                                                        | Household Deaths           |
|                                    |                              | Demographic and Health Survey                       | 2000                         | 1                                                        | Household Deaths           |
|                                    |                              | Based on MOH data - adjusted for incompleteness     | 2017                         | 1                                                        | Vital Registration         |
|                                    |                              | Based on 2004 DH - adjusted for incompleteness      | 2017                         | 1                                                        | Vital Registration         |
|                                    |                              | WHO VR (recalculated - unadjusted)                  | 1983-2018                    | 0                                                        | Vital Registration         |
|                                    |                              | WHO VR (recalculated - adjusted for incompleteness) | 2006-2018                    | 1                                                        | Vital Registration         |
|                                    |                              | Iraq                                                | Middle East and North Africa | Demographic Sample Survey and Sample Registration System | 1973                       |
| WHO VR (recalculated - unadjusted) | 1987-2018                    |                                                     |                              | 0                                                        | Vital Registration         |
| Ireland                            | Western Europe               | Census                                              | 2011                         | 1                                                        | Household Deaths           |

| Country                          | Region                          | Series                                              | Years     | Inclusion | Type                       |
|----------------------------------|---------------------------------|-----------------------------------------------------|-----------|-----------|----------------------------|
|                                  |                                 | WHO VR (recalculated - unadjusted)                  | 1950-1989 | 0         | Vital Registration         |
|                                  |                                 | WHO VR (recalculated - unadjusted)                  | 1989-2018 | 1         | Vital Registration         |
| Israel                           | Middle East and North Africa    | WHO VR (recalculated - unadjusted)                  | 1975-1989 | 0         | Vital Registration         |
|                                  |                                 | WHO VR (recalculated - unadjusted)                  | 1989-2020 | 1         | Vital Registration         |
| Italy                            | Western Europe                  | WHO VR (recalculated - unadjusted)                  | 1950-1989 | 0         | Vital Registration         |
|                                  |                                 | WHO VR (recalculated - unadjusted)                  | 1989-2018 | 1         | Vital Registration         |
| Jamaica                          | Latin America and Caribbean     | WHO VR (recalculated - unadjusted)                  | 1960-2019 | 0         | Vital Registration         |
| Japan                            | East Asia and Pacific           | WHO VR (recalculated - unadjusted)                  | 1950-1989 | 0         | Vital Registration         |
|                                  |                                 | WHO VR (recalculated - unadjusted)                  | 1989-2019 | 1         | Vital Registration         |
| Jordan                           | Middle East and North Africa    | Population and Family Health Survey                 | 1997      | 1         | Sibling survival histories |
|                                  |                                 | Census                                              | 2015      | 1         | Household Deaths           |
|                                  |                                 | WHO VR (recalculated - unadjusted)                  | 1965-2019 | 0         | Vital Registration         |
|                                  |                                 | WHO VR (recalculated - adjusted for incompleteness) | 2004-2019 | 1         | Vital Registration         |
| Kazakhstan                       | Eastern Europe and Central Asia | World Health Survey                                 | 2003      | 1         | Sibling survival histories |
|                                  |                                 | WHO VR (recalculated - unadjusted)                  | 1981-1989 | 0         | Vital Registration         |
|                                  |                                 | WHO VR (recalculated - unadjusted)                  | 1989-2020 | 1         | Vital Registration         |
| Kenya                            | Eastern and Southern Africa     | Demographic and Health Survey                       | 1998      | 1         | Sibling survival histories |
|                                  |                                 | Demographic and Health Survey                       | 2003      | 1         | Sibling survival histories |
|                                  |                                 | World Health Survey                                 | 2003      | 1         | Sibling survival histories |
|                                  |                                 | Demographic and Health Survey                       | 2008-2009 | 1         | Sibling survival histories |
|                                  |                                 | Census                                              | 2009      | 1         | Household Deaths           |
|                                  |                                 | Demographic and Health Survey                       | 2014      | 1         | Sibling survival histories |
| Kiribati                         | East Asia and Pacific           | WHO VR (recalculated - unadjusted)                  | 1991-2017 | 0         | Vital Registration         |
| Kuwait                           | Middle East and North Africa    | WHO VR (recalculated - unadjusted)                  | 1975-1989 | 0         | Vital Registration         |
|                                  |                                 | WHO VR (recalculated - unadjusted)                  | 1989-2018 | 1         | Vital Registration         |
| Kyrgyzstan                       | Eastern Europe and Central Asia | WHO VR (recalculated - unadjusted)                  | 1981-1999 | 0         | Vital Registration         |
|                                  |                                 | WHO VR (recalculated - unadjusted)                  | 1999-2020 | 1         | Vital Registration         |
|                                  |                                 | WHO VR (recalculated - adjusted for incompleteness) | 1989-1999 | 1         | Vital Registration         |
|                                  |                                 | WHO VR (recalculated - adjusted for incompleteness) | 1999-2020 | 0         | Vital Registration         |
| Lao People's Democratic Republic | East Asia and Pacific           | Census                                              | 1995      | 1         | Household Deaths           |
|                                  |                                 | World Health Survey                                 | 2003      | 1         | Sibling survival histories |
|                                  |                                 | Census                                              | 2005      | 1         | Household Deaths           |
|                                  |                                 | Multiple Indicator Cluster Survey                   | 2012      | 0         | Sibling survival histories |
|                                  |                                 | Census                                              | 2015      | 1         | Household Deaths           |
| Latvia                           | Western Europe                  | WHO VR (recalculated - unadjusted)                  | 1959-1989 | 0         | Vital Registration         |
|                                  |                                 | WHO VR (recalculated - unadjusted)                  | 1989-2019 | 1         | Vital Registration         |
| Lebanon                          | Middle East and North Africa    | WHO VR (recalculated - unadjusted)                  | 2017-2018 | 0         | Vital Registration         |
| Lesotho                          | Eastern and Southern Africa     | Demographic Survey                                  | 1971-1973 | 0         | Household Deaths           |
|                                  |                                 | World Fertility Survey                              | 1977      | 0         | Household Deaths           |
|                                  |                                 | Census                                              | 1986      | 0         | Household Deaths           |
|                                  |                                 | Census                                              | 1996      | 1         | Household Deaths           |
|                                  |                                 | Demographic and Health Survey                       | 2004      | 1         | Sibling survival histories |
|                                  |                                 | Census                                              | 2006      | 0         | Household Deaths           |
|                                  |                                 | Demographic and Health Survey                       | 2009      | 1         | Sibling survival histories |
|                                  |                                 | Demographic and Health Survey                       | 2014      | 1         | Sibling survival histories |
|                                  |                                 | Census                                              | 2016      | 1         | Household Deaths           |
| Liberia                          | West and Central Africa         | Demographic and Health Survey                       | 2006-2007 | 1         | Sibling survival histories |

| Country          | Region                       | Series                             | Years     | Inclusion | Type                       |
|------------------|------------------------------|------------------------------------|-----------|-----------|----------------------------|
|                  |                              | Census                             | 2008      | 0         | Household Deaths           |
|                  |                              | Demographic and Health Survey      | 2013      | 1         | Sibling survival histories |
| Libya            | Middle East and North Africa | WHO VR (recalculated - unadjusted) | 1981-2011 | 0         | Vital Registration         |
| Lithuania        | Western Europe               | Census                             | 2011      | 1         | Household Deaths           |
|                  |                              | Statistical Survey                 | 2018      | 1         | Household Deaths           |
|                  |                              | WHO VR (recalculated - unadjusted) | 1959-1989 | 0         | Vital Registration         |
|                  |                              | WHO VR (recalculated - unadjusted) | 1989-2020 | 1         | Vital Registration         |
| Luxembourg       | Western Europe               | WHO VR (recalculated - unadjusted) | 1960-1989 | 0         | Vital Registration         |
|                  |                              | WHO VR (recalculated - unadjusted) | 1989-2018 | 1         | Vital Registration         |
| Madagascar       | Eastern and Southern Africa  | Census                             | 1993      | 0         | Household Deaths           |
|                  |                              | Demographic and Health Survey      | 1997      | 1         | Sibling survival histories |
|                  |                              | Demographic and Health Survey      | 2003-2004 | 1         | Sibling survival histories |
|                  |                              | Demographic and Health Survey      | 2008-2009 | 1         | Sibling survival histories |
| Malawi           | Eastern and Southern Africa  | Population Change Survey           | 1970-1972 | 1         | Household Deaths           |
|                  |                              | Census                             | 1977      | 0         | Household Deaths           |
|                  |                              | Family Formation Survey            | 1984      | 0         | Household Deaths           |
|                  |                              | Census                             | 1987      | 0         | Household Deaths           |
|                  |                              | Demographic and Health Survey      | 1992      | 1         | Sibling survival histories |
|                  |                              | Census                             | 1998      | 1         | Household Deaths           |
|                  |                              | Demographic and Health Survey      | 2000      | 1         | Sibling survival histories |
|                  |                              | World Health Survey                | 2003      | 1         | Sibling survival histories |
|                  |                              | Demographic and Health Survey      | 2004      | 1         | Sibling survival histories |
|                  |                              | Second Integrated Household Survey | 2004-2005 | 1         | Household Deaths           |
|                  |                              | Census                             | 2008      | 1         | Household Deaths           |
|                  |                              | Demographic and Health Survey      | 2010      | 0         | Household Deaths           |
|                  |                              | Demographic and Health Survey      | 2010      | 1         | Sibling survival histories |
|                  |                              | Multiple Indicator Cluster Survey  | 2014      | 1         | Sibling survival histories |
|                  |                              | Demographic and Health Survey      | 2015-2016 | 1         | Sibling survival histories |
| Malaysia         | East Asia and Pacific        | World Health Survey                | 2003      | 0         | Sibling survival histories |
|                  |                              | WHO VR (recalculated - unadjusted) | 1990-2000 | 0         | Vital Registration         |
|                  |                              | WHO VR (recalculated - unadjusted) | 1991-2019 | 1         | Vital Registration         |
| Maldives         | South Asia                   | WHO VR (recalculated - unadjusted) | 1984-1989 | 0         | Vital Registration         |
|                  |                              | WHO VR (recalculated - unadjusted) | 1989-2020 | 1         | Vital Registration         |
| Mali             | West and Central Africa      | Census                             | 1976      | 0         | Household Deaths           |
|                  |                              | Census                             | 1987      | 1         | Household Deaths           |
|                  |                              | Demographic and Health Survey      | 1995-1996 | 0         | Sibling survival histories |
|                  |                              | Census                             | 1998      | 0         | Household Deaths           |
|                  |                              | Demographic and Health Survey      | 2001      | 1         | Sibling survival histories |
|                  |                              | World Health Survey                | 2003      | 1         | Sibling survival histories |
|                  |                              | Demographic and Health Survey      | 2006      | 1         | Sibling survival histories |
|                  |                              | Census                             | 2009      | 0         | Household Deaths           |
|                  |                              | Demographic and Health Survey      | 2012-2013 | 1         | Sibling survival histories |
|                  |                              | Demographic and Health Survey      | 2018      | 1         | Sibling survival histories |
| Malta            | Western Europe               | WHO VR (recalculated - unadjusted) | 1955-1989 | 0         | Vital Registration         |
|                  |                              | WHO VR (recalculated - unadjusted) | 1989-2018 | 1         | Vital Registration         |
| Marshall Islands | East Asia and Pacific        | WHO VR (recalculated - unadjusted) | 1986-2018 | 0         | Vital Registration         |
| Mauritania       | West and Central Africa      | Census                             | 1976-1977 | 0         | Household Deaths           |

| Country     | Region                          | Series                                              | Years     | Inclusion | Type                       |
|-------------|---------------------------------|-----------------------------------------------------|-----------|-----------|----------------------------|
|             |                                 | Census                                              | 1988      | 0         | Household Deaths           |
|             |                                 | World Health Survey                                 | 2003      | 0         | Sibling survival histories |
|             |                                 | Multiple Indicator Cluster Survey                   | 2011      | 0         | Sibling survival histories |
|             |                                 | Census                                              | 2013      | 0         | Household Deaths           |
| Mauritius   | Eastern and Southern Africa     | WHO VR (recalculated - unadjusted)                  | 1957-1989 | 0         | Vital Registration         |
|             |                                 | WHO VR (recalculated - unadjusted)                  | 1989-2020 | 1         | Vital Registration         |
| Mexico      | Latin America and Caribbean     | World Health Survey                                 | 2003      | 0         | Sibling survival histories |
|             |                                 | WHO VR (recalculated - unadjusted)                  | 1955-1989 | 0         | Vital Registration         |
|             |                                 | WHO VR (recalculated - unadjusted)                  | 1989-2019 | 1         | Vital Registration         |
| Monaco      | Western Europe                  | WHO VR (recalculated - unadjusted)                  | 1981-1984 | 0         | Vital Registration         |
| Mongolia    | East Asia and Pacific           | WHO VR (recalculated - unadjusted)                  | 1991-2020 | 0         | Vital Registration         |
|             |                                 | WHO VR (recalculated - adjusted for incompleteness) | 1991-2020 | 1         | Vital Registration         |
| Montenegro  | Eastern Europe and Central Asia | WHO VR (recalculated - unadjusted)                  | 1985-1989 | 0         | Vital Registration         |
|             |                                 | WHO VR (recalculated - unadjusted)                  | 1989-2019 | 1         | Vital Registration         |
| Morocco     | Middle East and North Africa    | Demographic and Health Survey                       | 1992      | 0         | Sibling survival histories |
|             |                                 | World Health Survey                                 | 2003      | 0         | Sibling survival histories |
|             |                                 | Demographic and Health Survey                       | 2003-2004 | 0         | Sibling survival histories |
|             |                                 | National Demographic Survey with repeated passages  | 2009-2010 | 0         | Household Deaths           |
|             |                                 | WHO VR (recalculated - unadjusted)                  | 1991-2015 | 0         | Vital Registration         |
| Mozambique  | Eastern and Southern Africa     | Census                                              | 1997      | 1         | Household Deaths           |
|             |                                 | Demographic and Health Survey                       | 1997      | 1         | Sibling survival histories |
|             |                                 | Demographic and Health Survey                       | 2003      | 1         | Sibling survival histories |
|             |                                 | Census                                              | 2007      | 0         | Household Deaths           |
|             |                                 | Demographic and Health Survey                       | 2011      | 1         | Sibling survival histories |
|             |                                 | Census                                              | 2017      | 0         | Household Deaths           |
|             |                                 | WHO VR (recalculated - unadjusted)                  | 2019-2020 | 0         | Vital Registration         |
| Myanmar     | East Asia and Pacific           | Population Change and Fertility Survey              | 1991      | 1         | Household Deaths           |
|             |                                 | Census                                              | 2014      | 1         | Household Deaths           |
|             |                                 | Demographic and Health Survey                       | 2015-2016 | 1         | Sibling survival histories |
|             |                                 | WHO VR (recalculated - unadjusted)                  | 2014-2019 | 0         | Vital Registration         |
| Namibia     | Eastern and Southern Africa     | Demographic and Health Survey                       | 1992      | 1         | Sibling survival histories |
|             |                                 | Demographic and Health Survey                       | 2000      | 1         | Sibling survival histories |
|             |                                 | Census                                              | 2001      | 1         | Household Deaths           |
|             |                                 | World Health Survey                                 | 2003      | 1         | Sibling survival histories |
|             |                                 | Demographic and Health Survey                       | 2006-2007 | 1         | Sibling survival histories |
|             |                                 | Census                                              | 2011      | 1         | Household Deaths           |
|             |                                 | Demographic and Health Survey                       | 2013      | 1         | Sibling survival histories |
| Nauru       | East Asia and Pacific           | WHO VR (recalculated - unadjusted)                  | 1997-2003 | 0         | Vital Registration         |
| Nepal       | South Asia                      | Demographic and Health Survey                       | 1996      | 1         | Sibling survival histories |
|             |                                 | Census                                              | 2001      | 1         | Household Deaths           |
|             |                                 | World Health Survey                                 | 2003      | 1         | Sibling survival histories |
|             |                                 | Demographic and Health Survey                       | 2006      | 1         | Sibling survival histories |
|             |                                 | Census                                              | 2011      | 1         | Household Deaths           |
|             |                                 | Demographic and Health Survey                       | 2016      | 1         | Sibling survival histories |
| Netherlands | Western Europe                  | WHO VR (recalculated - unadjusted)                  | 1950-1989 | 0         | Vital Registration         |
|             |                                 | WHO VR (recalculated - unadjusted)                  | 1989-2020 | 1         | Vital Registration         |
| New Zealand | East Asia and Pacific           | Census                                              | 2006      | 1         | Household Deaths           |

| Country          | Region                          | Series                                              | Years     | Inclusion | Type                       |
|------------------|---------------------------------|-----------------------------------------------------|-----------|-----------|----------------------------|
|                  |                                 | WHO VR (recalculated - unadjusted)                  | 1950-1989 | 0         | Vital Registration         |
|                  |                                 | WHO VR (recalculated - unadjusted)                  | 1989-2017 | 1         | Vital Registration         |
| Nicaragua        | Latin America and Caribbean     | Census                                              | 1995      | 0         | Household Deaths           |
|                  |                                 | Demographic and Health Survey 2001                  | 2001      | 0         | Household Deaths           |
|                  |                                 | Living Standards Measurement Survey                 | 2001      | 0         | Household Deaths           |
|                  |                                 | Census                                              | 2005      | 0         | Household Deaths           |
|                  |                                 | WHO VR (recalculated - unadjusted)                  | 1959-2019 | 0         | Vital Registration         |
| Niger            | West and Central Africa         | Demographic and Health Survey                       | 1992      | 1         | Sibling survival histories |
|                  |                                 | Census                                              | 2001      | 1         | Household Deaths           |
|                  |                                 | Demographic and Health Survey                       | 2006      | 1         | Sibling survival histories |
|                  |                                 | Demographic and Health Survey                       | 2012      | 1         | Sibling survival histories |
| Nigeria          | West and Central Africa         | Rural Demographic Sample Survey                     | 1965-1966 | 1         | Household Deaths           |
|                  |                                 | Demographic and Health Survey                       | 1999      | 0         | Sibling survival histories |
|                  |                                 | Demographic and Health Survey                       | 2008      | 1         | Sibling survival histories |
|                  |                                 | GHS Panel Survey                                    | 2010      | 1         | Household Deaths           |
|                  |                                 | GHS Panel Survey                                    | 2012-2013 | 1         | Household Deaths           |
|                  |                                 | Demographic and Health Survey                       | 2013      | 1         | Sibling survival histories |
|                  |                                 | Demographic and Health Survey                       | 2018      | 1         | Sibling survival histories |
| North Macedonia  | Eastern Europe and Central Asia | WHO VR (recalculated - unadjusted)                  | 1982-1989 | 0         | Vital Registration         |
|                  |                                 | WHO VR (recalculated - unadjusted)                  | 1989-2020 | 1         | Vital Registration         |
| Norway           | Western Europe                  | WHO VR (recalculated - unadjusted)                  | 1950-1989 | 0         | Vital Registration         |
|                  |                                 | WHO VR (recalculated - unadjusted)                  | 1989-2020 | 1         | Vital Registration         |
| Oman             | Middle East and North Africa    | WHO VR (recalculated - unadjusted)                  | 2009-2020 | 0         | Vital Registration         |
| Pakistan         | South Asia                      | Population Growth Estimation Experiment             | 1962-1965 | 0         | Household Deaths           |
|                  |                                 | World Health Survey                                 | 2003      | 0         | Sibling survival histories |
|                  |                                 | Pakistan Demographic Survey                         | 1984-2008 | 1         | Sample Vital Registration  |
| Palau            | East Asia and Pacific           | WHO VR (recalculated - unadjusted)                  | 1985-2007 | 1         | Vital Registration         |
| Panama           | Latin America and Caribbean     | TABLAS DE VIDA NACIONALES                           | 0         | 0         | Unknown                    |
|                  |                                 | Census                                              | 2000      | 0         | Household Deaths           |
|                  |                                 | WHO VR (recalculated - unadjusted)                  | 1955-2020 | 0         | Vital Registration         |
|                  |                                 | WHO VR (recalculated - adjusted for incompleteness) | 1990-2020 | 1         | Vital Registration         |
| Papua New Guinea | East Asia and Pacific           | Demographic and Health Survey                       | 2018      | 0         | Sibling survival histories |
|                  |                                 | WHO VR (recalculated - unadjusted)                  | 1977-1999 | 0         | Vital Registration         |
| Paraguay         | Latin America and Caribbean     | Census                                              | 2002      | 0         | Household Deaths           |
|                  |                                 | World Health Survey                                 | 2003      | 0         | Sibling survival histories |
|                  |                                 | WHO VR (recalculated - unadjusted)                  | 1980-2018 | 0         | Vital Registration         |
| Peru             | Latin America and Caribbean     | Demographic and Health Survey                       | 1991-1992 | 1         | Sibling survival histories |
|                  |                                 | Demographic and Health Survey                       | 1996      | 1         | Sibling survival histories |
|                  |                                 | Demographic and Health Survey                       | 2000      | 1         | Sibling survival histories |
|                  |                                 | Demographic and Health Survey                       | 2006      | 1         | Sibling survival histories |
|                  |                                 | Demographic and Health Survey                       | 2008      | 1         | Sibling survival histories |
|                  |                                 | Demographic and Health Survey                       | 2009      | 0         | Sibling survival histories |
|                  |                                 | Demographic and Health Survey                       | 2010      | 0         | Sibling survival histories |
|                  |                                 | Demographic and Health Survey                       | 2011      | 1         | Sibling survival histories |
|                  |                                 | Demographic and Health Survey                       | 2012      | 0         | Sibling survival histories |
|                  |                                 | WHO VR (recalculated - unadjusted)                  | 1966-2018 | 0         | Vital Registration         |
| Philippines      | East Asia and Pacific           | National Demographic and Health Survey              | 1993      | 1         | Sibling survival histories |

| Country                          | Region                          | Series                                  | Years     | Inclusion | Type                       |
|----------------------------------|---------------------------------|-----------------------------------------|-----------|-----------|----------------------------|
|                                  |                                 | National Demographic and Health Survey  | 1998      | 1         | Sibling survival histories |
|                                  |                                 | World Health Survey                     | 2003      | 0         | Sibling survival histories |
|                                  |                                 | WHO VR (recalculated - unadjusted)      | 1963-1993 | 0         | Vital Registration         |
|                                  |                                 | WHO VR (recalculated - unadjusted)      | 1993-2017 | 1         | Vital Registration         |
| Poland                           | Western Europe                  | WHO VR (recalculated - unadjusted)      | 1958-1989 | 0         | Vital Registration         |
|                                  |                                 | WHO VR (recalculated - unadjusted)      | 1989-2020 | 1         | Vital Registration         |
| Portugal                         | Western Europe                  | Census                                  | 2011      | 1         | Household Deaths           |
|                                  |                                 | WHO VR (recalculated - unadjusted)      | 1950-1989 | 0         | Vital Registration         |
|                                  |                                 | WHO VR (recalculated - unadjusted)      | 1989-2020 | 1         | Vital Registration         |
| Qatar                            | Middle East and North Africa    | WHO VR (recalculated - unadjusted)      | 1981-1990 | 0         | Vital Registration         |
|                                  |                                 | WHO VR (recalculated - unadjusted)      | 1990-2018 | 1         | Vital Registration         |
| Republic of Korea                | East Asia and Pacific           | National Life Table 1970-2015           | 2017      | 0         | Others                     |
|                                  |                                 | WHO VR (recalculated - unadjusted)      | 1980-1989 | 0         | Vital Registration         |
|                                  |                                 | WHO VR (recalculated - unadjusted)      | 1989-2019 | 1         | Vital Registration         |
| Republic of Moldova              | Eastern Europe and Central Asia | WHO VR (recalculated - unadjusted)      | 1981-1989 | 0         | Vital Registration         |
|                                  |                                 | WHO VR (recalculated - unadjusted)      | 1989-2020 | 1         | Vital Registration         |
| Romania                          | Eastern Europe and Central Asia | WHO VR (recalculated - unadjusted)      | 1963-1989 | 0         | Vital Registration         |
|                                  |                                 | WHO VR (recalculated - unadjusted)      | 1989-2020 | 1         | Vital Registration         |
| Russian Federation               | Eastern Europe and Central Asia | WHO VR (recalculated - unadjusted)      | 1959-1989 | 0         | Vital Registration         |
|                                  |                                 | WHO VR (recalculated - unadjusted)      | 1989-2020 | 1         | Vital Registration         |
| Rwanda                           | Eastern and Southern Africa     | Demographic and Health Survey           | 2000      | 1         | Sibling survival histories |
|                                  |                                 | Demographic and Health Survey           | 2000      | 0         | Sibling survival histories |
|                                  |                                 | Census                                  | 2002      | 1         | Household Deaths           |
|                                  |                                 | Demographic and Health Survey           | 2005      | 1         | Sibling survival histories |
|                                  |                                 | Demographic and Health Survey           | 2010      | 1         | Sibling survival histories |
|                                  |                                 | Census                                  | 2012      | 1         | Household Deaths           |
|                                  |                                 | Demographic and Health Survey           | 2014-2015 | 1         | Sibling survival histories |
| Saint Kitts and Nevis            | Latin America and Caribbean     | WHO VR (recalculated - unadjusted)      | 1970-1989 | 0         | Vital Registration         |
|                                  |                                 | WHO VR (recalculated - unadjusted)      | 1989-2017 | 1         | Vital Registration         |
| Saint Lucia                      | Latin America and Caribbean     | WHO VR (recalculated - unadjusted)      | 1971-1989 | 0         | Vital Registration         |
|                                  |                                 | WHO VR (recalculated - unadjusted)      | 1989-2019 | 1         | Vital Registration         |
| Saint Vincent and the Grenadines | Latin America and Caribbean     | WHO VR (recalculated - unadjusted)      | 1970-1988 | 0         | Vital Registration         |
|                                  |                                 | WHO VR (recalculated - unadjusted)      | 1988-2018 | 1         | Vital Registration         |
| Samoa                            | East Asia and Pacific           | Demographic and Health Survey           | 1999      | 0         | Household Deaths           |
|                                  |                                 | Demographic and Vital Statistics Survey | 2000      | 0         | Household Deaths           |
|                                  |                                 | Population and Housing Census           | 2011      | 0         | Household Deaths           |
|                                  |                                 | Population and Housing Census           | 2016      | 0         | Household Deaths           |
| San Marino                       | Western Europe                  | WHO VR (recalculated - unadjusted)      | 1980-2012 | 0         | Vital Registration         |
|                                  |                                 | WHO VR (recalculated - unadjusted)      | 2014-2019 | 0         | Vital Registration         |
| Sao Tome and Principe            | West and Central Africa         | Demographic and Health Survey           | 2008-2009 | 1         | Sibling survival histories |
|                                  |                                 | Census                                  | 2012      | 1         | Household Deaths           |
|                                  |                                 | Multiple Indicator Cluster Survey       | 2014      | 1         | Sibling survival histories |
|                                  |                                 | WHO VR (recalculated - unadjusted)      | 1984-1988 | 0         | Vital Registration         |
| Saudi Arabia                     | Middle East and North Africa    | Demographic Survey                      | 1999      | 1         | Household Deaths           |
|                                  |                                 | Census                                  | 2004      | 1         | Household Deaths           |
|                                  |                                 | Demographic Survey                      | 2007      | 1         | Household Deaths           |
|                                  |                                 | Census                                  | 2010      | 1         | Household Deaths           |

| Country                            | Region                          | Series                                              | Years          | Inclusion                          | Type                       |
|------------------------------------|---------------------------------|-----------------------------------------------------|----------------|------------------------------------|----------------------------|
| Senegal                            | West and Central Africa         | Demographic Survey                                  | 2016           | 0                                  | Household Deaths           |
|                                    |                                 | WHO VR (recalculated - unadjusted)                  | 2009-2013      | 0                                  | Vital Registration         |
|                                    |                                 | Demographic and Health Survey                       | 1992-1993      | 1                                  | Sibling survival histories |
|                                    |                                 | Census                                              | 2002           | 1                                  | Household Deaths           |
|                                    |                                 | World Health Survey                                 | 2003           | 0                                  | Sibling survival histories |
|                                    |                                 | Demographic and Health Survey                       | 2005           | 1                                  | Sibling survival histories |
| Serbia                             | Eastern Europe and Central Asia | Demographic and Health Survey                       | 2010-2011      | 1                                  | Sibling survival histories |
|                                    |                                 | Census                                              | 2013           | 1                                  | Household Deaths           |
| Seychelles                         | Eastern and Southern Africa     | WHO VR (recalculated - unadjusted)                  | 1985-1989      | 0                                  | Vital Registration         |
|                                    |                                 | WHO VR (recalculated - unadjusted)                  | 1989-2018      | 1                                  | Vital Registration         |
| Sierra Leone                       | West and Central Africa         | Census                                              | 1960           | 1                                  | Household Deaths           |
|                                    |                                 | WHO VR (recalculated - unadjusted)                  | 1968-1989      | 0                                  | Vital Registration         |
|                                    |                                 | WHO VR (recalculated - unadjusted)                  | 1989-2017      | 1                                  | Vital Registration         |
| Singapore                          | East Asia and Pacific           | Census                                              | 2004           | 1                                  | Household Deaths           |
|                                    |                                 | Demographic and Health Survey                       | 2008           | 1                                  | Sibling survival histories |
|                                    |                                 | Demographic and Health Survey                       | 2013           | 1                                  | Sibling survival histories |
|                                    |                                 | Census                                              | 2015           | 1                                  | Household Deaths           |
| Slovakia                           | Western Europe                  | WHO VR (recalculated - unadjusted)                  | 1955-1989      | 0                                  | Vital Registration         |
|                                    |                                 | WHO VR (recalculated - unadjusted)                  | 1989-2020      | 1                                  | Vital Registration         |
| Slovenia                           | Western Europe                  | WHO VR (recalculated - unadjusted)                  | 1950-1989      | 0                                  | Vital Registration         |
|                                    |                                 | WHO VR (recalculated - unadjusted)                  | 1989-2020      | 1                                  | Vital Registration         |
| Solomon Islands                    | East Asia and Pacific           | WHO VR (recalculated - unadjusted)                  | 1982-1989      | 0                                  | Vital Registration         |
|                                    |                                 | WHO VR (recalculated - unadjusted)                  | 1989-2019      | 1                                  | Vital Registration         |
| South Africa                       | Eastern and Southern Africa     | WHO VR (recalculated - unadjusted)                  | 2017-2019      | 0                                  | Vital Registration         |
| South Africa                       | Eastern and Southern Africa     | Household Survey                                    | 1993           | 0                                  | Household Deaths           |
|                                    |                                 | Household Survey                                    | 1995           | 0                                  | Household Deaths           |
|                                    |                                 | Household Survey                                    | 1996           | 0                                  | Household Deaths           |
|                                    |                                 | Household Survey                                    | 1997           | 0                                  | Household Deaths           |
|                                    |                                 | Household Survey                                    | 1998           | 0                                  | Household Deaths           |
|                                    |                                 | Demographic and Health Survey                       | 1998           | 1                                  | Sibling survival histories |
|                                    |                                 | Census                                              | 2001           | 1                                  | Household Deaths           |
|                                    |                                 | World Health Survey                                 | 2003           | 1                                  | Sibling survival histories |
|                                    |                                 | Community Survey                                    | 2007           | 0                                  | Household Deaths           |
|                                    |                                 | Census                                              | 2011           | 1                                  | Household Deaths           |
|                                    |                                 | Demographic and Health Survey                       | 2016           | 1                                  | Sibling survival histories |
|                                    |                                 | WHO VR (recalculated - unadjusted)                  | 1980-2016      | 0                                  | Vital Registration         |
|                                    |                                 | WHO VR (recalculated - adjusted for incompleteness) | 1991-2016      | 0                                  | Vital Registration         |
|                                    |                                 | Rapid Mortality Surveillance                        | 2020           | 1                                  | Others                     |
|                                    |                                 | Spain                                               | Western Europe | WHO VR (recalculated - unadjusted) | 1950-1989                  |
| WHO VR (recalculated - unadjusted) | 1989-2019                       |                                                     |                | 1                                  | Vital Registration         |
| Sri Lanka                          | South Asia                      | World Health Survey                                 | 2003           | 1                                  | Sibling survival histories |
|                                    |                                 | WHO VR (recalculated - unadjusted)                  | 1950-1989      | 0                                  | Vital Registration         |
|                                    |                                 | WHO VR (recalculated - unadjusted)                  | 1989-2015      | 1                                  | Vital Registration         |
| State of Palestine                 | Middle East and North Africa    | Census                                              | 2017           | 0                                  | Household Deaths           |
|                                    |                                 | WHO VR (recalculated - unadjusted)                  | 2008-2018      | 0                                  | Vital Registration         |
| Sudan                              | Eastern and Southern Africa     | Demographic and Health Survey                       | 1989-1990      | 0                                  | Sibling survival histories |
|                                    |                                 | Census                                              | 1993           | 0                                  | Household Deaths           |



| Country              | Region                          | Series                                              | Years     | Inclusion | Type                       |
|----------------------|---------------------------------|-----------------------------------------------------|-----------|-----------|----------------------------|
|                      |                                 | Census                                              | 2008      | 0         | Household Deaths           |
| Suriname             | Latin America and Caribbean     | WHO VR (recalculated - unadjusted)                  | 1971-2015 | 0         | Vital Registration         |
|                      |                                 | WHO VR (recalculated - adjusted for incompleteness) | 1989-2015 | 1         | Vital Registration         |
| Sweden               | Western Europe                  | WHO VR (recalculated - unadjusted)                  | 1950-1989 | 0         | Vital Registration         |
|                      |                                 | WHO VR (recalculated - unadjusted)                  | 1989-2020 | 1         | Vital Registration         |
| Switzerland          | Western Europe                  | WHO VR (recalculated - unadjusted)                  | 1950-1989 | 0         | Vital Registration         |
|                      |                                 | WHO VR (recalculated - unadjusted)                  | 1989-2019 | 1         | Vital Registration         |
| Syrian Arab Republic | Middle East and North Africa    | PAPCHILD Maternal and Child Health Survey           | 1993      | 1         | Household Deaths           |
|                      |                                 | WHO VR (recalculated - unadjusted)                  | 1983-1985 | 0         | Vital Registration         |
|                      |                                 | WHO VR (recalculated - unadjusted)                  | 1998-2011 | 1         | Vital Registration         |
| Tajikistan           | Eastern Europe and Central Asia | WHO VR (recalculated - unadjusted)                  | 1981-2000 | 0         | Vital Registration         |
|                      |                                 | WHO VR (recalculated - unadjusted)                  | 2000-2006 | 1         | Vital Registration         |
|                      |                                 | WHO VR (recalculated - adjusted for incompleteness) | 1989-2000 | 1         | Vital Registration         |
|                      |                                 | WHO VR (recalculated - adjusted for incompleteness) | 2000-2006 | 0         | Vital Registration         |
| Thailand             | East Asia and Pacific           | National Life Tables                                | 0         | 0         | Unknown                    |
|                      |                                 | Survey of Population Change                         | 1995-1996 | 1         | Household Deaths           |
|                      |                                 | Survey of Population Change                         | 2005-2006 | 1         | Household Deaths           |
|                      |                                 | WHO VR (recalculated - unadjusted)                  | 1955-2019 | 0         | Vital Registration         |
|                      |                                 | WHO VR (recalculated - adjusted for incompleteness) | 1990-2019 | 1         | Vital Registration         |
| Timor-Leste          | East Asia and Pacific           | Demographic and Health Survey                       | 1997      | 1         | Sibling survival histories |
|                      |                                 | Demographic and Health Survey                       | 2009-2010 | 1         | Sibling survival histories |
|                      |                                 | Census                                              | 2015      | 1         | Household Deaths           |
|                      |                                 | Demographic and Health Survey                       | 2016      | 1         | Sibling survival histories |
| Togo                 | West and Central Africa         | Demographic survey                                  | 1961      | 1         | Household Deaths           |
|                      |                                 | Census                                              | 1981      | 1         | Household Deaths           |
|                      |                                 | Demographic and Health Survey                       | 1998      | 1         | Sibling survival histories |
|                      |                                 | Census                                              | 2010      | 1         | Household Deaths           |
|                      |                                 | Demographic and Health Survey                       | 2013-2014 | 1         | Sibling survival histories |
| Tonga                | East Asia and Pacific           | Census                                              | 2006      | 1         | Household Deaths           |
|                      |                                 | WHO VR (recalculated - unadjusted)                  | 1992-2019 | 1         | Vital Registration         |
| Trinidad and Tobago  | Latin America and Caribbean     | WHO VR (recalculated - unadjusted)                  | 1951-1989 | 0         | Vital Registration         |
|                      |                                 | WHO VR (recalculated - unadjusted)                  | 1989-2013 | 1         | Vital Registration         |
| Tunisia              | Middle East and North Africa    | National Demographic Survey                         | 1968-1969 | 0         | Household Deaths           |
|                      |                                 | World Health Survey                                 | 2003      | 1         | Sibling survival histories |
|                      |                                 | WHO VR (recalculated - unadjusted)                  | 1980-2014 | 0         | Vital Registration         |
|                      |                                 | WHO VR (recalculated - unadjusted)                  | 2015-2018 | 1         | Vital Registration         |
|                      |                                 | WHO VR (recalculated - adjusted for incompleteness) | 1994-2001 | 1         | Vital Registration         |
|                      |                                 | WHO VR (recalculated - adjusted for incompleteness) | 2009-2018 | 0         | Vital Registration         |
| Turkey               | Eastern Europe and Central Asia | National Verbal Autopsy Survey                      | 2003      | 1         | Household Deaths           |
|                      |                                 | WHO VR (recalculated - unadjusted)                  | 1999-2009 | 0         | Vital Registration         |
|                      |                                 | WHO VR (recalculated - unadjusted)                  | 2009-2020 | 1         | Vital Registration         |
| Turkmenistan         | Eastern Europe and Central Asia | WHO VR (recalculated - unadjusted)                  | 1981-2016 | 0         | Vital Registration         |
|                      |                                 | WHO VR (recalculated - adjusted for incompleteness) | 1989-2016 | 1         | Vital Registration         |
| Tuvalu               | East Asia and Pacific           | WHO VR (recalculated - unadjusted)                  | 1991-2006 | 0         | Vital Registration         |
| Uganda               | Eastern and Southern Africa     | Demographic and Health Survey                       | 1995      | 1         | Sibling survival histories |
|                      |                                 | Demographic and Health Survey                       | 2000-2001 | 1         | Sibling survival histories |
|                      |                                 | Census                                              | 2002      | 1         | Household Deaths           |

| Country                            | Region                          | Series                                              | Years     | Inclusion | Type                       |
|------------------------------------|---------------------------------|-----------------------------------------------------|-----------|-----------|----------------------------|
|                                    |                                 | Demographic and Health Survey                       | 2006      | 1         | Sibling survival histories |
|                                    |                                 | Demographic and Health Survey                       | 2011      | 1         | Sibling survival histories |
|                                    |                                 | Census                                              | 2014      | 1         | Household Deaths           |
|                                    |                                 | Demographic and Health Survey                       | 2016      | 1         | Sibling survival histories |
| Ukraine                            | Eastern Europe and Central Asia | World Health Survey                                 | 2003      | 0         | Sibling survival histories |
|                                    |                                 | WHO VR (recalculated - unadjusted)                  | 1959-1989 | 0         | Vital Registration         |
|                                    |                                 | WHO VR (recalculated - unadjusted)                  | 1989-2020 | 1         | Vital Registration         |
| United Arab Emirates               | Middle East and North Africa    | World Health Survey                                 | 2003      | 0         | Sibling survival histories |
|                                    |                                 | WHO VR (recalculated - unadjusted)                  | 2003-2018 | 0         | Vital Registration         |
| United Kingdom                     | Western Europe                  | WHO VR (recalculated - unadjusted)                  | 1950-1989 | 0         | Vital Registration         |
|                                    |                                 | WHO VR (recalculated - unadjusted)                  | 1989-2019 | 1         | Vital Registration         |
| United Republic of Tanzania        | Eastern and Southern Africa     | Census                                              | 1967      | 1         | Household Deaths           |
|                                    |                                 | National Demographic Survey                         | 1973      | 0         | Household Deaths           |
|                                    |                                 | Census                                              | 1988      | 1         | Household Deaths           |
|                                    |                                 | Demographic and Health Survey                       | 1996      | 1         | Sibling survival histories |
|                                    |                                 | Census                                              | 2002      | 1         | Household Deaths           |
|                                    |                                 | Demographic and Health Survey                       | 2004-2005 | 1         | Sibling survival histories |
|                                    |                                 | Demographic and Health Survey                       | 2010      | 1         | Sibling survival histories |
|                                    |                                 | National Panel Survey                               | 2012-2013 | 1         | Household Deaths           |
|                                    |                                 | Demographic and Health Survey                       | 2015-2016 | 1         | Sibling survival histories |
| United States of America           | North America                   | WHO VR (recalculated - unadjusted)                  | 1950-1989 | 0         | Vital Registration         |
|                                    |                                 | WHO VR (recalculated - unadjusted)                  | 1989-2018 | 1         | Vital Registration         |
| Uruguay                            | Latin America and Caribbean     | World Health Survey                                 | 2003      | 0         | Sibling survival histories |
|                                    |                                 | WHO VR (recalculated - unadjusted)                  | 1955-1989 | 0         | Vital Registration         |
|                                    |                                 | WHO VR (recalculated - unadjusted)                  | 1989-2020 | 1         | Vital Registration         |
| Uzbekistan                         | Eastern Europe and Central Asia | WHO VR (recalculated - unadjusted)                  | 1981-2017 | 0         | Vital Registration         |
|                                    |                                 | WHO VR (recalculated - adjusted for incompleteness) | 1989-2017 | 1         | Vital Registration         |
| Venezuela (Bolivarian Republic of) | Latin America and Caribbean     | WHO VR (recalculated - unadjusted)                  | 1955-2017 | 0         | Vital Registration         |
|                                    |                                 | WHO VR (recalculated - unadjusted)                  | 1990-2001 | 1         | Vital Registration         |
|                                    |                                 | WHO VR (recalculated - adjusted for incompleteness) | 2001-2017 | 1         | Vital Registration         |
| Viet Nam                           | East Asia and Pacific           | Census                                              | 1989      | 1         | Household Deaths           |
|                                    |                                 | Census                                              | 1999      | 1         | Household Deaths           |
|                                    |                                 | World Health Survey                                 | 2003      | 1         | Sibling survival histories |
|                                    |                                 | Population Change and Family Planning Survey        | 2007      | 1         | Household Deaths           |
|                                    |                                 | Population Change and Family Planning Survey        | 2008      | 1         | Household Deaths           |
|                                    |                                 | Population Change and Family Planning Survey        | 2013      | 1         | Household Deaths           |
| Zambia                             | Eastern and Southern Africa     | Demographic and Health Survey                       | 1996      | 1         | Sibling survival histories |
|                                    |                                 | Demographic and Health Survey                       | 2001-2002 | 1         | Sibling survival histories |
|                                    |                                 | World Health Survey                                 | 2003      | 1         | Sibling survival histories |
|                                    |                                 | Demographic and Health Survey                       | 2007      | 1         | Sibling survival histories |
|                                    |                                 | Census                                              | 2010      | 1         | Household Deaths           |
|                                    |                                 | Demographic and Health Survey                       | 2013-2014 | 1         | Sibling survival histories |
|                                    |                                 | Demographic and Health Survey                       | 2018      | 1         | Sibling survival histories |
| Zimbabwe                           | Eastern and Southern Africa     | Census                                              | 1992      | 1         | Household Deaths           |
|                                    |                                 | Demographic and Health Survey                       | 1994      | 1         | Sibling survival histories |
|                                    |                                 | Inter-Censal Demographic Survey                     | 1997      | 1         | Household Deaths           |
|                                    |                                 | Demographic and Health Survey                       | 1999      | 1         | Sibling survival histories |

| Country | Region | Series                             | Years     | Inclusion | Type                       |
|---------|--------|------------------------------------|-----------|-----------|----------------------------|
|         |        | Census                             | 2002      | 1         | Household Deaths           |
|         |        | World Health Survey                | 2003      | 1         | Sibling survival histories |
|         |        | Demographic and Health Survey      | 2005-2006 | 1         | Sibling survival histories |
|         |        | Demographic and Health Survey      | 2010-2011 | 1         | Sibling survival histories |
|         |        | Census                             | 2012      | 1         | Household Deaths           |
|         |        | Multiple Indicator Cluster Survey  | 2014      | 1         | Sibling survival histories |
|         |        | Demographic and Health Survey      | 2015      | 1         | Sibling survival histories |
|         |        | Inter-Censal Demographic Survey    | 2017      | 1         | Household Deaths           |
|         |        | WHO VR (recalculated - unadjusted) | 1982-2003 | 0         | Vital Registration         |

Table S7 – *Data series included in the analysis*

## 4 MORTALITY LEVELS AND NUMBERS OF DEATHS IN 1990 AND 2019

Table S8 presents the estimates of the probability of dying among youth aged 15-24 (deaths per 1,000 youths aged 15), and Table S9 presents the estimates of the probability of dying among adolescents aged 15-19 (deaths per 1,000 adolescents aged 15). Tables S10 and S11 present the numbers of deaths among youth aged 15-24 and adolescents aged 15-19 in 1990 and 2019.

| Country                    | 1990       |             |             | 2019       |             |             |
|----------------------------|------------|-------------|-------------|------------|-------------|-------------|
|                            | $_{10q15}$ | Lower bound | Upper bound | $_{10q15}$ | Lower bound | Upper bound |
| Afghanistan                | 49.7       | 23.8        | 136.0       | 30.9       | 17.6        | 54.8        |
| Albania                    | 8.0        | 7.7         | 8.3         | 3.5        | 3.2         | 3.9         |
| Algeria                    | 10.6       | 9.0         | 12.5        | 5.9        | 5.7         | 6.1         |
| Andorra                    | 8.8        | 6.9         | 11.2        | 3.4        | 2.6         | 4.3         |
| Angola                     | 70.7       | 55.1        | 90.0        | 32.0       | 24.9        | 40.7        |
| Antigua and Barbuda        | 13.7       | 6.4         | 30.0        | 5.6        | 3.7         | 8.6         |
| Argentina                  | 8.6        | 8.4         | 8.8         | 8.3        | 7.8         | 8.8         |
| Armenia                    | 6.9        | 6.5         | 7.2         | 4.4        | 3.4         | 5.3         |
| Australia                  | 7.7        | 7.5         | 7.9         | 3.4        | 3.2         | 3.7         |
| Austria                    | 7.9        | 7.6         | 8.2         | 2.8        | 2.4         | 3.3         |
| Azerbaijan                 | 9.1        | 8.8         | 9.3         | 5.7        | 5.1         | 6.5         |
| Bahamas                    | 12.3       | 10.7        | 14.2        | 17.3       | 12.9        | 23.2        |
| Bahrain                    | 6.1        | 5.4         | 6.8         | 4.8        | 3.5         | 6.5         |
| Bangladesh                 | 23.7       | 21.5        | 26.4        | 11.7       | 8.6         | 16.1        |
| Barbados                   | 10.0       | 8.9         | 11.3        | 6.0        | 3.8         | 9.5         |
| Belarus                    | 11.4       | 11.1        | 11.6        | 3.8        | 3.4         | 4.2         |
| Belgium                    | 7.6        | 7.4         | 7.8         | 2.8        | 2.6         | 3.1         |
| Belize                     | 9.4        | 7.6         | 11.6        | 11.4       | 9.6         | 13.5        |
| Benin                      | 28.7       | 23.1        | 35.5        | 22.2       | 15.5        | 33.1        |
| Bhutan                     | 30.0       | 17.3        | 51.4        | 12.2       | 6.3         | 23.0        |
| Bolivia (Plurin. State of) | 23.4       | 19.1        | 28.0        | 9.8        | 4.8         | 20.0        |
| Bosnia and Herz.           | 6.5        | 6.2         | 6.8         | 4.2        | 3.4         | 5.3         |
| Botswana                   | 38.3       | 28.9        | 50.9        | 15.2       | 7.7         | 29.0        |
| Brazil                     | 13.4       | 13.1        | 13.7        | 13.6       | 12.2        | 15.1        |
| Brunei Darussalam          | 14.0       | 11.7        | 16.8        | 3.9        | 3.2         | 4.7         |
| Bulgaria                   | 8.1        | 7.9         | 8.3         | 5.3        | 5.0         | 5.7         |
| Burkina Faso               | 37.0       | 30.8        | 44.1        | 16.0       | 8.4         | 29.8        |
| Burundi                    | 59.8       | 34.2        | 99.9        | 17.5       | 10.6        | 30.1        |
| Cabo Verde                 | 9.2        | 8.0         | 10.7        | 6.1        | 4.1         | 9.1         |
| Cambodia                   | 37.3       | 29.1        | 47.1        | 8.2        | 4.5         | 14.8        |
| Cameroon                   | 30.5       | 25.6        | 35.9        | 29.8       | 21.4        | 41.1        |
| Canada                     | 7.5        | 7.3         | 7.7         | 4.6        | 4.4         | 4.9         |
| Central Afr. Rep.          | 45.1       | 36.8        | 55.3        | 34.7       | 14.6        | 82.4        |
| Chad                       | 46.8       | 38.5        | 57.0        | 34.8       | 21.9        | 54.3        |
| Chile                      | 8.4        | 8.2         | 8.6         | 5.0        | 3.9         | 6.4         |

| Country                     | 1990       |             |             | 2019       |             |             |
|-----------------------------|------------|-------------|-------------|------------|-------------|-------------|
|                             | $10q_{15}$ | Lower bound | Upper bound | $10q_{15}$ | Lower bound | Upper bound |
| China                       | 8.7        | 7.1         | 11.1        | 3.8        | 2.3         | 6.3         |
| Colombia                    | 26.3       | 22.3        | 31.1        | 11.3       | 10.9        | 11.6        |
| Comoros                     | 24.1       | 16.4        | 38.3        | 9.0        | 4.6         | 17.9        |
| Congo                       | 53.7       | 30.6        | 89.4        | 16.3       | 9.0         | 29.2        |
| Cook Islands                | 17.3       | 13.7        | 21.8        | 9.4        | 4.7         | 19.4        |
| Costa Rica                  | 6.4        | 6.1         | 6.7         | 7.8        | 7.3         | 8.3         |
| Côte d'Ivoire               | 31.0       | 25.3        | 37.6        | 26.4       | 14.5        | 47.9        |
| Croatia                     | 7.8        | 7.4         | 8.2         | 3.4        | 2.9         | 3.9         |
| Cuba                        | 10.5       | 10.3        | 10.8        | 4.8        | 4.5         | 5.0         |
| Cyprus                      | 6.4        | 5.8         | 7.1         | 3.0        | 2.4         | 3.8         |
| Czechia                     | 6.9        | 6.7         | 7.1         | 3.9        | 3.7         | 4.2         |
| Dem. People's Rep. of Korea | 14.7       | 11.5        | 18.8        | 9.2        | 7.2         | 11.7        |
| Dem. Rep. of the Congo      | 45.8       | 27.6        | 77.9        | 37.3       | 22.6        | 63.7        |
| Denmark                     | 5.2        | 5.0         | 5.5         | 2.4        | 2.1         | 2.6         |
| Djibouti                    | 42.8       | 33.3        | 54.7        | 27.1       | 21.1        | 34.6        |
| Dominica                    | 6.4        | 5.5         | 7.6         | 6.0        | 3.6         | 10.0        |
| Dominican Republic          | 13.1       | 8.8         | 18.5        | 12.6       | 6.8         | 22.3        |
| Ecuador                     | 14.3       | 13.8        | 14.8        | 10.2       | 5.3         | 19.7        |
| Egypt                       | 12.4       | 12.1        | 12.7        | 7.4        | 7.1         | 7.6         |
| El Salvador                 | 27.3       | 26.5        | 28.0        | 24.4       | 20.3        | 29.2        |
| Equatorial Guinea           | 40.0       | 31.3        | 51.4        | 24.9       | 19.5        | 32.0        |
| Eritrea                     | 50.6       | 39.5        | 64.6        | 21.7       | 16.9        | 27.7        |
| Estonia                     | 13.9       | 13.2        | 14.6        | 4.2        | 3.6         | 4.8         |
| Eswatini                    | 29.9       | 23.3        | 38.3        | 25.3       | 19.8        | 32.4        |
| Ethiopia                    | 91.8       | 74.0        | 113.2       | 16.5       | 10.6        | 25.4        |
| Fiji                        | 16.4       | 9.3         | 29.8        | 9.9        | 8.4         | 11.8        |
| Finland                     | 8.3        | 8.0         | 8.7         | 4.9        | 4.5         | 5.3         |
| France                      | 7.7        | 7.6         | 7.9         | 3.2        | 3.0         | 3.4         |
| Gabon                       | 23.1       | 16.3        | 32.2        | 15.1       | 7.2         | 29.9        |
| Gambia                      | 38.6       | 30.2        | 49.5        | 18.8       | 14.7        | 24.2        |
| Georgia                     | 9.4        | 9.1         | 9.8         | 7.0        | 6.3         | 7.8         |
| Germany                     | 6.5        | 6.4         | 6.6         | 2.6        | 2.5         | 2.8         |
| Ghana                       | 30.1       | 18.6        | 50.6        | 15.1       | 8.5         | 27.0        |
| Greece                      | 6.9        | 6.7         | 7.1         | 3.0        | 2.7         | 3.4         |
| Grenada                     | 10.8       | 8.9         | 13.0        | 5.8        | 4.2         | 8.2         |
| Guatemala                   | 20.1       | 19.6        | 20.6        | 14.9       | 13.3        | 16.6        |
| Guinea                      | 33.7       | 27.2        | 42.1        | 31.5       | 19.4        | 50.7        |
| Guinea-Bissau               | 45.6       | 35.5        | 58.6        | 24.2       | 18.8        | 31.1        |
| Guyana                      | 14.3       | 13.6        | 15.1        | 17.2       | 12.5        | 23.6        |
| Haiti                       | 40.7       | 31.7        | 52.7        | 18.5       | 12.0        | 28.0        |
| Honduras                    | 18.4       | 14.5        | 23.6        | 10.0       | 7.9         | 12.8        |
| Hungary                     | 8.5        | 8.3         | 8.7         | 3.4        | 3.1         | 3.8         |
| Iceland                     | 6.9        | 5.9         | 8.0         | 2.9        | 2.2         | 3.8         |

| Country                     | 1990  |             |             | 2019  |             |             |
|-----------------------------|-------|-------------|-------------|-------|-------------|-------------|
|                             | 10q15 | Lower bound | Upper bound | 10q15 | Lower bound | Upper bound |
| India                       | 24.3  | 22.0        | 26.9        | 9.9   | 7.5         | 13.1        |
| Indonesia                   | 12.5  | 10.3        | 15.0        | 10.1  | 5.6         | 18.0        |
| Iran (Islamic Rep. of)      | 23.2  | 15.6        | 34.5        | 10.0  | 9.0         | 11.2        |
| Iraq                        | 10.9  | 8.5         | 13.9        | 9.5   | 7.4         | 12.2        |
| Ireland                     | 6.2   | 6.0         | 6.5         | 2.4   | 2.0         | 2.8         |
| Israel                      | 5.2   | 5.0         | 5.4         | 2.8   | 2.6         | 3.0         |
| Italy                       | 6.4   | 6.2         | 6.5         | 2.6   | 2.3         | 3.1         |
| Jamaica                     | 13.4  | 10.5        | 17.1        | 9.1   | 7.1         | 11.6        |
| Japan                       | 4.8   | 4.7         | 4.9         | 2.6   | 2.4         | 2.7         |
| Jordan                      | 8.1   | 6.1         | 10.8        | 5.6   | 5.2         | 6.0         |
| Kazakhstan                  | 13.8  | 13.5        | 14.1        | 7.4   | 7.1         | 7.6         |
| Kenya                       | 23.1  | 18.7        | 28.4        | 16.0  | 9.3         | 26.8        |
| Kiribati                    | 22.0  | 17.2        | 28.2        | 16.0  | 12.5        | 20.4        |
| Kuwait                      | 11.9  | 10.9        | 13.0        | 6.1   | 5.2         | 7.4         |
| Kyrgyzstan                  | 12.0  | 11.7        | 12.4        | 6.4   | 6.1         | 6.7         |
| Lao People's Dem. Rep.      | 27.6  | 14.8        | 46.8        | 12.1  | 6.6         | 22.5        |
| Latvia                      | 14.6  | 14.0        | 15.2        | 6.1   | 5.3         | 7.0         |
| Lebanon                     | 21.9  | 17.1        | 27.9        | 5.1   | 4.0         | 6.5         |
| Lesotho                     | 30.1  | 16.6        | 48.6        | 27.7  | 17.3        | 44.4        |
| Liberia                     | 61.2  | 23.3        | 178.1       | 28.7  | 15.4        | 52.0        |
| Libya                       | 9.9   | 7.7         | 12.7        | 10.1  | 7.9         | 13.0        |
| Lithuania                   | 12.4  | 11.9        | 12.8        | 5.5   | 5.0         | 6.1         |
| Luxembourg                  | 9.6   | 8.4         | 10.9        | 1.7   | 1.2         | 2.3         |
| Madagascar                  | 31.1  | 25.4        | 37.9        | 22.6  | 11.4        | 45.7        |
| Malawi                      | 40.5  | 34.0        | 47.6        | 18.6  | 11.2        | 29.9        |
| Malaysia                    | 10.7  | 10.0        | 11.4        | 6.5   | 6.1         | 6.9         |
| Maldives                    | 12.8  | 11.6        | 14.2        | 4.7   | 3.8         | 5.8         |
| Mali                        | 36.3  | 30.1        | 44.2        | 21.8  | 15.6        | 31.4        |
| Malta                       | 4.5   | 3.9         | 5.3         | 2.5   | 1.8         | 3.6         |
| Marshall Islands            | 15.7  | 12.3        | 20.1        | 12.5  | 9.8         | 16.1        |
| Mauritania                  | 31.2  | 24.3        | 40.0        | 23.3  | 18.2        | 29.8        |
| Mauritius                   | 8.5   | 8.0         | 9.0         | 8.0   | 7.3         | 8.7         |
| Mexico                      | 11.5  | 11.2        | 11.8        | 11.5  | 10.7        | 12.4        |
| Micronesia (Fed. States of) | 16.6  | 12.9        | 21.1        | 12.1  | 9.4         | 15.4        |
| Monaco                      | 6.3   | 4.9         | 8.0         | 3.5   | 2.7         | 4.4         |
| Mongolia                    | 15.3  | 13.2        | 17.5        | 8.8   | 8.2         | 9.5         |
| Montenegro                  | 6.4   | 5.7         | 7.1         | 3.4   | 2.7         | 4.3         |
| Morocco                     | 12.7  | 9.9         | 16.2        | 7.7   | 6.0         | 9.8         |
| Mozambique                  | 37.9  | 30.1        | 47.5        | 30.7  | 16.5        | 57.2        |
| Myanmar                     | 26.7  | 17.9        | 44.6        | 9.1   | 5.4         | 15.1        |
| Namibia                     | 27.4  | 22.4        | 32.6        | 21.3  | 12.2        | 36.7        |
| Nauru                       | 17.4  | 13.6        | 22.3        | 12.3  | 9.6         | 15.8        |
| Nepal                       | 20.4  | 16.8        | 24.9        | 10.4  | 6.7         | 16.2        |

| Country                   | 1990       |             |             | 2019       |             |             |
|---------------------------|------------|-------------|-------------|------------|-------------|-------------|
|                           | $10q_{15}$ | Lower bound | Upper bound | $10q_{15}$ | Lower bound | Upper bound |
| Netherlands               | 4.6        | 4.5         | 4.8         | 2.5        | 2.3         | 2.6         |
| New Zealand               | 11.4       | 11.0        | 11.8        | 4.2        | 3.4         | 5.2         |
| Nicaragua                 | 19.7       | 15.4        | 25.2        | 9.9        | 7.8         | 12.7        |
| Niger                     | 39.6       | 31.5        | 48.2        | 27.1       | 15.1        | 48.4        |
| Nigeria                   | 37.6       | 27.3        | 54.1        | 18.9       | 14.4        | 25.0        |
| Niue                      | 8.0        | 6.3         | 10.3        | 10.6       | 8.4         | 13.7        |
| North Macedonia           | 5.3        | 5.0         | 5.6         | 2.9        | 2.5         | 3.2         |
| Norway                    | 6.0        | 5.7         | 6.4         | 3.3        | 3.0         | 3.6         |
| Oman                      | 9.7        | 7.6         | 12.3        | 6.1        | 4.7         | 7.7         |
| Pakistan                  | 21.8       | 18.5        | 25.8        | 11.5       | 6.1         | 22.0        |
| Palau                     | 16.1       | 12.9        | 20.1        | 16.6       | 7.8         | 35.5        |
| Panama                    | 11.3       | 10.7        | 11.9        | 9.2        | 8.7         | 9.7         |
| Papua New Guinea          | 20.7       | 16.2        | 26.4        | 14.9       | 11.7        | 19.1        |
| Paraguay                  | 16.3       | 12.7        | 20.9        | 10.7       | 8.4         | 13.8        |
| Peru                      | 19.9       | 17.4        | 23.4        | 6.5        | 3.5         | 12.2        |
| Philippines               | 14.3       | 13.0        | 15.7        | 9.0        | 7.6         | 10.7        |
| Poland                    | 8.6        | 8.4         | 8.8         | 4.6        | 4.4         | 4.7         |
| Portugal                  | 11.0       | 10.8        | 11.3        | 2.7        | 2.5         | 2.9         |
| Qatar                     | 7.1        | 6.0         | 8.4         | 3.1        | 2.5         | 3.9         |
| Republic of Korea         | 8.8        | 8.6         | 9.0         | 2.7        | 2.5         | 2.9         |
| Republic of Moldova       | 12.7       | 12.3        | 13.1        | 7.3        | 6.8         | 7.8         |
| Romania                   | 8.7        | 8.5         | 8.9         | 4.6        | 4.4         | 4.9         |
| Russian Federation        | 13.8       | 13.4        | 14.2        | 7.5        | 7.2         | 7.8         |
| Rwanda                    | 70.5       | 54.1        | 92.0        | 15.2       | 8.1         | 29.6        |
| Saint Kitts and Nevis     | 9.1        | 6.8         | 12.0        | 16.1       | 10.9        | 24.1        |
| Saint Lucia               | 11.4       | 9.9         | 13.1        | 9.2        | 7.1         | 11.9        |
| Saint Vincent and the Gr. | 8.8        | 7.6         | 10.1        | 13.8       | 10.3        | 18.3        |
| Samoa                     | 12.1       | 9.5         | 15.5        | 8.5        | 6.7         | 10.9        |
| San Marino                | 9.2        | 7.2         | 11.7        | 2.3        | 1.8         | 3.0         |
| Sao Tome and Principe     | 25.0       | 7.1         | 83.3        | 17.8       | 8.6         | 34.4        |
| Saudi Arabia              | 15.3       | 5.1         | 92.3        | 12.1       | 5.8         | 25.1        |
| Senegal                   | 25.0       | 20.5        | 30.3        | 19.1       | 11.6        | 31.6        |
| Serbia                    | 6.2        | 6.0         | 6.5         | 3.3        | 2.7         | 4.1         |
| Seychelles                | 8.5        | 7.0         | 10.5        | 11.6       | 7.9         | 16.9        |
| Sierra Leone              | 61.1       | 29.7        | 271.8       | 52.1       | 31.8        | 83.2        |
| Singapore                 | 5.9        | 5.6         | 6.2         | 2.1        | 1.9         | 2.4         |
| Slovakia                  | 7.0        | 6.8         | 7.2         | 4.2        | 3.9         | 4.5         |
| Slovenia                  | 8.6        | 8.2         | 9.1         | 3.2        | 2.7         | 3.8         |
| Solomon Islands           | 13.8       | 10.8        | 17.7        | 9.8        | 7.7         | 12.5        |
| Somalia                   | 66.7       | 52.1        | 85.6        | 42.6       | 33.3        | 54.7        |
| South Africa              | 21.3       | 16.2        | 27.8        | 20.0       | 17.2        | 23.5        |
| South Sudan               | 69.3       | 53.8        | 88.8        | 37.7       | 29.3        | 48.3        |
| Spain                     | 8.4        | 8.2         | 8.6         | 2.3        | 2.1         | 2.5         |

| Country                        | 1990          |             |             | 2019          |             |             |
|--------------------------------|---------------|-------------|-------------|---------------|-------------|-------------|
|                                | $_{10}q_{15}$ | Lower bound | Upper bound | $_{10}q_{15}$ | Lower bound | Upper bound |
| Sri Lanka                      | 27.6          | 26.5        | 28.6        | 4.0           | 3.0         | 5.4         |
| State of Palestine             | 10.2          | 7.9         | 13.0        | 7.4           | 5.8         | 9.5         |
| Sudan                          | 52.3          | 40.9        | 67.2        | 27.4          | 21.4        | 35.1        |
| Suriname                       | 14.8          | 13.7        | 16.1        | 7.8           | 5.5         | 11.0        |
| Sweden                         | 5.1           | 4.9         | 5.3         | 3.5           | 3.3         | 3.7         |
| Switzerland                    | 8.6           | 8.3         | 8.8         | 2.5           | 2.2         | 2.9         |
| Syrian Arab Republic           | 14.6          | 10.0        | 22.5        | 16.8          | 8.4         | 32.9        |
| Tajikistan                     | 10.7          | 10.4        | 11.0        | 4.5           | 2.3         | 8.8         |
| Thailand                       | 15.6          | 15.1        | 16.1        | 12.7          | 11.9        | 13.5        |
| Timor-Leste                    | 21.9          | 10.3        | 44.0        | 26.9          | 13.4        | 54.4        |
| Togo                           | 24.6          | 19.4        | 31.5        | 17.7          | 10.0        | 30.2        |
| Tonga                          | 6.8           | 4.7         | 9.9         | 8.1           | 6.2         | 10.6        |
| Trinidad and Tobago            | 10.8          | 10.2        | 11.4        | 10.5          | 6.6         | 16.8        |
| Tunisia                        | 8.6           | 6.9         | 10.8        | 7.5           | 6.7         | 8.5         |
| Turkey                         | 27.9          | 6.6         | 114.8       | 4.3           | 4.1         | 4.4         |
| Turkmenistan                   | 12.7          | 12.4        | 13.1        | 10.2          | 8.0         | 13.0        |
| Tuvalu                         | 16.3          | 12.8        | 21.0        | 10.8          | 8.5         | 13.9        |
| Uganda                         | 47.7          | 40.3        | 56.4        | 27.2          | 17.7        | 43.2        |
| Ukraine                        | 11.5          | 11.2        | 11.8        | 6.1           | 5.9         | 6.4         |
| United Arab Emirates           | 7.0           | 5.4         | 9.0         | 5.2           | 4.0         | 6.6         |
| United Kingdom                 | 5.7           | 5.5         | 5.8         | 3.2           | 3.0         | 3.4         |
| United Rep. of Tanzania        | 28.4          | 22.8        | 34.7        | 17.7          | 10.5        | 31.4        |
| United States                  | 9.8           | 9.6         | 10.1        | 7.8           | 7.0         | 8.7         |
| Uruguay                        | 8.2           | 7.8         | 8.5         | 9.0           | 8.4         | 9.5         |
| Uzbekistan                     | 11.2          | 10.9        | 11.4        | 8.0           | 6.7         | 9.6         |
| Vanuatu                        | 13.2          | 10.3        | 16.9        | 11.3          | 8.8         | 14.4        |
| Venezuela (Bolivarian Rep. of) | 12.3          | 11.9        | 12.7        | 26.2          | 22.1        | 31.0        |
| Viet Nam                       | 14.2          | 9.4         | 20.4        | 6.6           | 3.6         | 12.4        |
| Yemen                          | 15.2          | 11.9        | 19.4        | 25.1          | 19.6        | 32.0        |
| Zambia                         | 48.7          | 41.5        | 57.2        | 21.7          | 15.0        | 30.7        |
| Zimbabwe                       | 21.6          | 18.2        | 25.4        | 24.0          | 15.8        | 35.9        |

Table S8 – *Probability of dying among youth aged 15-24 (deaths per 1,000 youths aged 15)*



| Country                    | 1990      |             |             | 2019      |             |             |
|----------------------------|-----------|-------------|-------------|-----------|-------------|-------------|
|                            | $5q_{15}$ | Lower bound | Upper bound | $5q_{15}$ | Lower bound | Upper bound |
| Afghanistan                | 16.9      | 11.5        | 24.5        | 13.6      | 9.1         | 19.3        |
| Albania                    | 3.3       | 3.1         | 3.5         | 1.7       | 1.5         | 1.9         |
| Algeria                    | 5.0       | 4.6         | 5.5         | 2.7       | 2.6         | 2.8         |
| Andorra                    | 3.6       | 2.8         | 4.6         | 1.3       | 1.1         | 1.7         |
| Angola                     | 28.7      | 22.4        | 36.6        | 12.8      | 10.0        | 16.3        |
| Antigua and Barbuda        | 6.9       | 3.7         | 10.5        | 2.4       | 1.6         | 3.6         |
| Argentina                  | 3.7       | 3.6         | 3.7         | 3.4       | 3.3         | 3.6         |
| Armenia                    | 2.8       | 2.6         | 3.0         | 2.0       | 1.8         | 2.3         |
| Australia                  | 3.3       | 3.2         | 3.3         | 1.5       | 1.4         | 1.5         |
| Austria                    | 3.5       | 3.4         | 3.7         | 1.2       | 1.1         | 1.4         |
| Azerbaijan                 | 3.7       | 3.5         | 3.8         | 2.6       | 2.3         | 2.8         |
| Bahamas                    | 4.1       | 3.3         | 4.9         | 4.8       | 3.5         | 6.2         |
| Bahrain                    | 3.0       | 2.6         | 3.4         | 2.0       | 1.6         | 2.5         |
| Bangladesh                 | 9.9       | 8.2         | 11.2        | 6.5       | 4.8         | 8.8         |
| Barbados                   | 4.4       | 3.7         | 5.2         | 2.3       | 1.5         | 3.2         |
| Belarus                    | 4.2       | 4.1         | 4.4         | 1.5       | 1.3         | 1.6         |
| Belgium                    | 3.1       | 3.0         | 3.2         | 1.0       | 1.0         | 1.1         |
| Belize                     | 3.1       | 2.3         | 3.9         | 4.0       | 3.2         | 4.9         |
| Benin                      | 14.2      | 10.8        | 18.8        | 11.2      | 7.5         | 16.3        |
| Bhutan                     | 16.4      | 10.1        | 23.9        | 5.5       | 3.1         | 8.9         |
| Bolivia (Plurin. State of) | 11.4      | 9.3         | 14.0        | 4.6       | 2.6         | 6.9         |
| Bosnia and Herz.           | 2.6       | 2.4         | 2.8         | 1.7       | 1.4         | 2.0         |
| Botswana                   | 13.2      | 9.6         | 17.8        | 3.9       | 2.2         | 6.5         |
| Brazil                     | 5.4       | 5.3         | 5.5         | 5.8       | 5.4         | 6.2         |
| Brunei Darussalam          | 6.8       | 5.6         | 8.1         | 1.3       | 1.0         | 1.7         |
| Bulgaria                   | 3.4       | 3.3         | 3.6         | 2.4       | 2.2         | 2.6         |
| Burkina Faso               | 18.0      | 14.8        | 22.0        | 6.1       | 3.5         | 9.3         |
| Burundi                    | 24.0      | 17.7        | 34.2        | 8.7       | 5.8         | 12.2        |
| Cabo Verde                 | 3.4       | 2.8         | 4.2         | 2.3       | 1.7         | 3.0         |
| Cambodia                   | 17.9      | 13.3        | 24.0        | 3.5       | 2.1         | 5.7         |
| Cameroon                   | 13.4      | 11.1        | 16.0        | 12.3      | 8.5         | 17.9        |
| Canada                     | 3.4       | 3.3         | 3.5         | 1.7       | 1.6         | 1.8         |
| Central Afr. Rep.          | 17.9      | 14.2        | 22.8        | 11.3      | 5.6         | 19.8        |
| Chad                       | 25.8      | 20.0        | 33.1        | 15.5      | 9.9         | 23.0        |
| Chile                      | 3.3       | 3.3         | 3.4         | 2.1       | 1.8         | 2.4         |
| China                      | 5.0       | 4.3         | 5.9         | 1.3       | 1.0         | 1.8         |
| Colombia                   | 9.7       | 8.6         | 10.8        | 4.5       | 4.3         | 4.6         |
| Comoros                    | 12.7      | 8.9         | 18.1        | 3.3       | 1.6         | 5.6         |
| Congo                      | 24.6      | 13.0        | 39.5        | 5.4       | 2.7         | 9.5         |
| Cook Islands               | 7.7       | 5.5         | 10.8        | 5.8       | 3.4         | 8.2         |
| Costa Rica                 | 2.7       | 2.6         | 2.9         | 2.9       | 2.7         | 3.1         |
| Côte d'Ivoire              | 12.4      | 9.5         | 16.0        | 11.1      | 6.2         | 17.9        |
| Croatia                    | 3.0       | 2.8         | 3.2         | 1.4       | 1.2         | 1.6         |

| Country                     | 1990 |             |             | 2019 |             |             |
|-----------------------------|------|-------------|-------------|------|-------------|-------------|
|                             | 5q15 | Lower bound | Upper bound | 5q15 | Lower bound | Upper bound |
| Cuba                        | 4.6  | 4.5         | 4.7         | 2.0  | 1.9         | 2.1         |
| Cyprus                      | 2.9  | 2.5         | 3.3         | 1.2  | 0.9         | 1.5         |
| Czechia                     | 2.8  | 2.7         | 3.0         | 1.5  | 1.4         | 1.6         |
| Dem. People's Rep. of Korea | 6.5  | 5.1         | 8.3         | 4.0  | 3.1         | 5.1         |
| Dem. Rep. of the Congo      | 19.5 | 10.4        | 28.4        | 18.0 | 11.3        | 26.7        |
| Denmark                     | 2.2  | 2.0         | 2.3         | 1.0  | 0.9         | 1.1         |
| Djibouti                    | 17.3 | 13.5        | 22.1        | 10.8 | 8.4         | 13.7        |
| Dominica                    | 2.6  | 2.0         | 3.3         | 1.9  | 1.0         | 3.1         |
| Dominican Republic          | 6.2  | 4.0         | 8.9         | 4.2  | 2.5         | 6.6         |
| Ecuador                     | 5.9  | 5.7         | 6.1         | 3.8  | 2.3         | 5.7         |
| Egypt                       | 5.8  | 5.7         | 6.0         | 3.5  | 3.4         | 3.6         |
| El Salvador                 | 9.8  | 9.5         | 10.1        | 11.7 | 10.6        | 12.8        |
| Equatorial Guinea           | 17.8 | 13.9        | 22.9        | 10.9 | 8.5         | 14.0        |
| Eritrea                     | 20.6 | 16.0        | 26.2        | 8.5  | 6.7         | 10.9        |
| Estonia                     | 5.8  | 5.4         | 6.2         | 1.9  | 1.6         | 2.2         |
| Eswatini                    | 11.9 | 9.3         | 15.3        | 10.0 | 7.8         | 12.9        |
| Ethiopia                    | 38.6 | 29.1        | 50.8        | 8.0  | 4.9         | 11.6        |
| Fiji                        | 6.7  | 3.0         | 10.1        | 3.7  | 2.9         | 4.5         |
| Finland                     | 3.5  | 3.3         | 3.7         | 1.8  | 1.7         | 2.0         |
| France                      | 2.8  | 2.7         | 2.9         | 1.2  | 1.1         | 1.2         |
| Gabon                       | 9.1  | 5.6         | 14.6        | 7.0  | 3.1         | 12.5        |
| Gambia                      | 17.2 | 13.4        | 22.0        | 8.1  | 6.4         | 10.4        |
| Georgia                     | 3.4  | 3.2         | 3.6         | 2.8  | 2.5         | 3.2         |
| Germany                     | 2.8  | 2.8         | 2.9         | 1.1  | 1.1         | 1.2         |
| Ghana                       | 11.9 | 6.3         | 20.6        | 7.4  | 4.6         | 11.1        |
| Greece                      | 2.7  | 2.5         | 2.8         | 1.2  | 1.0         | 1.3         |
| Grenada                     | 3.9  | 3.0         | 5.1         | 2.5  | 1.6         | 3.6         |
| Guatemala                   | 7.7  | 7.5         | 7.9         | 6.3  | 5.9         | 6.8         |
| Guinea                      | 18.3 | 13.9        | 23.7        | 13.3 | 8.4         | 19.5        |
| Guinea-Bissau               | 20.5 | 15.9        | 26.3        | 10.6 | 8.2         | 13.6        |
| Guyana                      | 5.4  | 4.9         | 5.8         | 5.8  | 4.6         | 7.2         |
| Haiti                       | 17.9 | 12.6        | 24.7        | 6.8  | 4.1         | 11.1        |
| Honduras                    | 7.5  | 5.9         | 9.6         | 4.0  | 3.1         | 5.1         |
| Hungary                     | 3.4  | 3.3         | 3.5         | 1.4  | 1.3         | 1.5         |
| Iceland                     | 3.5  | 2.9         | 4.2         | 1.5  | 1.1         | 1.9         |
| India                       | 10.5 | 9.7         | 11.5        | 4.0  | 3.3         | 4.6         |
| Indonesia                   | 6.6  | 5.4         | 8.1         | 4.7  | 3.1         | 6.8         |
| Iran (Islamic Rep. of)      | 11.4 | 8.6         | 14.5        | 4.7  | 4.4         | 5.0         |
| Iraq                        | 5.1  | 4.0         | 6.6         | 4.3  | 3.4         | 5.5         |
| Ireland                     | 2.4  | 2.3         | 2.6         | 0.8  | 0.7         | 1.0         |
| Israel                      | 2.2  | 2.1         | 2.3         | 1.2  | 1.1         | 1.3         |
| Italy                       | 2.8  | 2.7         | 2.8         | 1.1  | 1.0         | 1.1         |
| Jamaica                     | 5.4  | 4.2         | 6.8         | 3.6  | 2.8         | 4.6         |

| Country                     | 1990 |             |             | 2019 |             |             |
|-----------------------------|------|-------------|-------------|------|-------------|-------------|
|                             | 5q15 | Lower bound | Upper bound | 5q15 | Lower bound | Upper bound |
| Japan                       | 2.2  | 2.1         | 2.2         | 0.9  | 0.9         | 1.0         |
| Jordan                      | 3.7  | 2.6         | 5.2         | 2.3  | 2.1         | 2.5         |
| Kazakhstan                  | 5.4  | 5.3         | 5.5         | 3.0  | 2.9         | 3.1         |
| Kenya                       | 8.9  | 6.8         | 11.6        | 6.3  | 4.0         | 9.4         |
| Kiribati                    | 9.9  | 7.8         | 12.7        | 7.1  | 5.5         | 9.1         |
| Kuwait                      | 5.0  | 4.4         | 5.6         | 2.0  | 1.5         | 2.6         |
| Kyrgyzstan                  | 4.4  | 4.2         | 4.6         | 2.7  | 2.5         | 2.9         |
| Lao People's Dem. Rep.      | 16.6 | 5.5         | 26.4        | 4.6  | 2.4         | 9.5         |
| Latvia                      | 6.2  | 5.9         | 6.6         | 2.5  | 2.1         | 2.9         |
| Lebanon                     | 8.8  | 6.8         | 11.2        | 2.3  | 1.8         | 2.9         |
| Lesotho                     | 13.2 | 8.6         | 20.2        | 10.2 | 6.0         | 15.9        |
| Liberia                     | 18.3 | 3.6         | 60.6        | 18.5 | 9.9         | 26.8        |
| Libya                       | 4.6  | 3.6         | 5.9         | 4.3  | 3.4         | 5.5         |
| Lithuania                   | 5.1  | 4.9         | 5.4         | 2.3  | 2.0         | 2.5         |
| Luxembourg                  | 4.2  | 3.5         | 5.1         | 0.8  | 0.6         | 1.1         |
| Madagascar                  | 14.2 | 10.8        | 18.4        | 10.7 | 6.0         | 16.7        |
| Malawi                      | 18.8 | 15.3        | 22.5        | 7.0  | 4.6         | 10.2        |
| Malaysia                    | 4.3  | 4.1         | 4.6         | 3.0  | 2.9         | 3.1         |
| Maldives                    | 5.5  | 4.8         | 6.4         | 2.4  | 1.9         | 2.9         |
| Mali                        | 17.9 | 14.4        | 22.6        | 10.0 | 6.8         | 14.5        |
| Malta                       | 2.0  | 1.6         | 2.4         | 1.1  | 0.7         | 1.5         |
| Marshall Islands            | 7.0  | 5.5         | 9.0         | 5.5  | 4.3         | 7.1         |
| Mauritania                  | 13.7 | 10.7        | 17.6        | 10.1 | 7.9         | 12.9        |
| Mauritius                   | 3.6  | 3.3         | 3.9         | 3.0  | 2.7         | 3.4         |
| Mexico                      | 4.6  | 4.5         | 4.7         | 4.4  | 4.2         | 4.5         |
| Micronesia (Fed. States of) | 7.4  | 5.7         | 9.4         | 5.3  | 4.1         | 6.8         |
| Monaco                      | 2.6  | 2.0         | 3.3         | 1.4  | 1.1         | 1.8         |
| Mongolia                    | 5.6  | 5.2         | 6.1         | 3.8  | 3.5         | 4.0         |
| Montenegro                  | 2.4  | 2.0         | 2.7         | 1.2  | 0.9         | 1.6         |
| Morocco                     | 6.0  | 4.7         | 7.7         | 3.5  | 2.8         | 4.5         |
| Mozambique                  | 19.0 | 13.8        | 25.7        | 9.6  | 4.8         | 16.8        |
| Myanmar                     | 14.2 | 9.1         | 23.1        | 3.3  | 2.0         | 5.2         |
| Namibia                     | 11.2 | 9.1         | 14.0        | 7.4  | 4.6         | 11.0        |
| Nauru                       | 7.8  | 6.1         | 10.0        | 5.4  | 4.3         | 7.0         |
| Nepal                       | 10.1 | 7.8         | 13.2        | 4.5  | 2.8         | 6.9         |
| Netherlands                 | 2.0  | 2.0         | 2.1         | 1.0  | 1.0         | 1.1         |
| New Zealand                 | 5.0  | 4.8         | 5.3         | 1.8  | 1.5         | 2.1         |
| Nicaragua                   | 8.0  | 6.2         | 10.2        | 4.0  | 3.1         | 5.1         |
| Niger                       | 19.5 | 15.2        | 24.7        | 10.3 | 6.0         | 16.3        |
| Nigeria                     | 17.1 | 11.9        | 23.6        | 8.5  | 6.1         | 12.0        |
| Niue                        | 3.5  | 2.7         | 4.5         | 4.7  | 3.7         | 6.0         |
| North Macedonia             | 2.3  | 2.1         | 2.5         | 1.3  | 1.1         | 1.5         |
| Norway                      | 2.8  | 2.7         | 3.0         | 1.2  | 1.1         | 1.4         |

| Country                   | 1990 |             |             | 2019 |             |             |
|---------------------------|------|-------------|-------------|------|-------------|-------------|
|                           | 5q15 | Lower bound | Upper bound | 5q15 | Lower bound | Upper bound |
| Oman                      | 4.5  | 3.5         | 5.7         | 2.8  | 2.2         | 3.5         |
| Pakistan                  | 10.6 | 8.8         | 12.7        | 6.0  | 3.6         | 9.2         |
| Palau                     | 6.0  | 4.2         | 8.6         | 6.5  | 3.2         | 11.0        |
| Panama                    | 4.7  | 4.4         | 5.0         | 3.3  | 3.1         | 3.6         |
| Papua New Guinea          | 9.3  | 7.3         | 11.9        | 6.6  | 5.2         | 8.5         |
| Paraguay                  | 6.6  | 5.2         | 8.5         | 4.3  | 3.4         | 5.5         |
| Peru                      | 9.4  | 7.9         | 11.0        | 2.3  | 1.3         | 3.6         |
| Philippines               | 5.4  | 5.0         | 5.8         | 3.4  | 3.0         | 3.7         |
| Poland                    | 3.5  | 3.4         | 3.6         | 1.8  | 1.7         | 1.8         |
| Portugal                  | 4.7  | 4.6         | 4.9         | 1.1  | 1.0         | 1.2         |
| Qatar                     | 3.7  | 3.1         | 4.6         | 1.7  | 1.3         | 2.0         |
| Republic of Korea         | 3.8  | 3.7         | 3.9         | 1.1  | 1.0         | 1.2         |
| Republic of Moldova       | 4.7  | 4.5         | 4.9         | 3.0  | 2.8         | 3.3         |
| Romania                   | 3.6  | 3.5         | 3.7         | 2.1  | 2.0         | 2.2         |
| Russian Federation        | 5.5  | 5.4         | 5.6         | 2.9  | 2.8         | 2.9         |
| Rwanda                    | 34.3 | 25.8        | 45.8        | 5.9  | 3.5         | 8.9         |
| Saint Kitts and Nevis     | 4.1  | 2.8         | 5.7         | 6.0  | 4.0         | 8.7         |
| Saint Lucia               | 4.4  | 3.6         | 5.3         | 4.2  | 3.1         | 5.4         |
| Saint Vincent and the Gr. | 3.7  | 3.0         | 4.4         | 6.0  | 4.4         | 7.9         |
| Samoa                     | 5.3  | 4.2         | 6.8         | 3.7  | 2.9         | 4.7         |
| San Marino                | 3.7  | 2.9         | 4.8         | 0.9  | 0.7         | 1.2         |
| Sao Tome and Principe     | 10.0 | 2.6         | 21.1        | 6.1  | 3.1         | 10.3        |
| Saudi Arabia              | 7.8  | 2.3         | 13.6        | 5.3  | 2.9         | 8.4         |
| Senegal                   | 11.8 | 9.2         | 15.1        | 10.1 | 6.7         | 14.1        |
| Serbia                    | 2.7  | 2.6         | 2.8         | 1.4  | 1.3         | 1.6         |
| Seychelles                | 2.6  | 1.9         | 3.5         | 10.3 | 9.0         | 11.1        |
| Sierra Leone              | 32.0 | 16.2        | 52.4        | 24.9 | 15.9        | 35.7        |
| Singapore                 | 2.4  | 2.2         | 2.6         | 0.9  | 0.8         | 1.1         |
| Slovakia                  | 2.9  | 2.8         | 3.0         | 1.7  | 1.6         | 1.9         |
| Slovenia                  | 3.3  | 3.0         | 3.6         | 1.3  | 1.1         | 1.6         |
| Solomon Islands           | 6.1  | 4.8         | 7.8         | 4.3  | 3.3         | 5.5         |
| Somalia                   | 26.7 | 20.8        | 34.3        | 17.2 | 13.4        | 22.1        |
| South Africa              | 8.0  | 5.9         | 11.2        | 7.6  | 6.8         | 8.6         |
| South Sudan               | 28.5 | 22.2        | 36.6        | 15.1 | 11.8        | 19.4        |
| Spain                     | 3.3  | 3.2         | 3.3         | 0.9  | 0.8         | 1.0         |
| Sri Lanka                 | 9.4  | 9.1         | 9.7         | 1.6  | 1.3         | 1.8         |
| State of Palestine        | 4.8  | 3.7         | 6.1         | 3.4  | 2.7         | 4.4         |
| Sudan                     | 20.9 | 16.4        | 26.8        | 10.9 | 8.5         | 14.0        |
| Suriname                  | 5.9  | 5.2         | 6.7         | 3.2  | 2.5         | 4.1         |
| Sweden                    | 2.3  | 2.2         | 2.4         | 1.2  | 1.1         | 1.3         |
| Switzerland               | 3.2  | 3.0         | 3.3         | 1.1  | 1.0         | 1.2         |
| Syrian Arab Republic      | 8.5  | 6.5         | 10.4        | 7.1  | 5.5         | 8.7         |
| Tajikistan                | 4.3  | 4.2         | 4.5         | 1.6  | 1.1         | 2.3         |

| Country                        | 1990      |             |             | 2019      |             |             |
|--------------------------------|-----------|-------------|-------------|-----------|-------------|-------------|
|                                | $5q_{15}$ | Lower bound | Upper bound | $5q_{15}$ | Lower bound | Upper bound |
| Thailand                       | 6.8       | 6.6         | 7.1         | 6.1       | 5.8         | 6.4         |
| Timor-Leste                    | 9.3       | 4.8         | 16.6        | 15.0      | 9.3         | 21.8        |
| Togo                           | 11.8      | 9.2         | 15.4        | 7.6       | 4.7         | 11.2        |
| Tonga                          | 2.4       | 1.5         | 3.6         | 3.1       | 2.2         | 4.2         |
| Trinidad and Tobago            | 4.0       | 3.8         | 4.4         | 3.6       | 2.7         | 4.5         |
| Tunisia                        | 3.7       | 3.1         | 4.3         | 3.1       | 2.8         | 3.4         |
| Turkey                         | 14.8      | 5.4         | 23.1        | 2.0       | 1.9         | 2.0         |
| Turkmenistan                   | 5.1       | 4.9         | 5.3         | 4.5       | 3.9         | 5.1         |
| Tuvalu                         | 7.3       | 5.7         | 9.3         | 4.7       | 3.7         | 6.1         |
| Uganda                         | 18.5      | 15.0        | 22.8        | 13.4      | 9.1         | 18.8        |
| Ukraine                        | 4.4       | 4.3         | 4.5         | 2.4       | 2.3         | 2.5         |
| United Arab Emirates           | 3.2       | 2.5         | 4.1         | 2.3       | 1.8         | 3.0         |
| United Kingdom                 | 2.6       | 2.5         | 2.6         | 1.3       | 1.2         | 1.4         |
| United Rep. of Tanzania        | 13.3      | 10.9        | 16.1        | 7.0       | 4.8         | 10.2        |
| United States                  | 4.4       | 4.3         | 4.5         | 2.6       | 2.5         | 2.8         |
| Uruguay                        | 3.9       | 3.7         | 4.1         | 3.5       | 3.2         | 3.8         |
| Uzbekistan                     | 4.4       | 4.3         | 4.5         | 3.7       | 3.3         | 4.0         |
| Vanuatu                        | 5.8       | 4.6         | 7.5         | 5.0       | 3.9         | 6.3         |
| Venezuela (Bolivarian Rep. of) | 5.2       | 5.0         | 5.4         | 10.7      | 9.6         | 11.8        |
| Viet Nam                       | 6.4       | 4.2         | 9.4         | 3.0       | 1.8         | 4.8         |
| Yemen                          | 7.2       | 5.6         | 9.2         | 10.7      | 8.4         | 13.7        |
| Zambia                         | 18.5      | 15.0        | 23.0        | 9.3       | 6.5         | 13.3        |
| Zimbabwe                       | 7.5       | 6.1         | 9.2         | 9.7       | 7.0         | 13.3        |

Table S9 – *Probability of dying among adolescents aged 15-19 (deaths per 1,000 adolescents aged 15)*

| Country                    | 1990              |                |                | 2019              |                |                |
|----------------------------|-------------------|----------------|----------------|-------------------|----------------|----------------|
|                            | Deaths<br>(15-24) | Lower<br>bound | Upper<br>bound | Deaths<br>(15-24) | Lower<br>bound | Upper<br>bound |
| Afghanistan                | 11.6              | 5.9            | 31.7           | 25.8              | 15.3           | 44.9           |
| Albania                    | 0.5               | 0.5            | 0.5            | 0.2               | 0.1            | 0.2            |
| Algeria                    | 5.6               | 4.8            | 6.5            | 3.6               | 3.4            | 3.7            |
| Andorra                    | 0.0               | 0.0            | 0.0            | 0.0               | 0.0            | 0.0            |
| Angola                     | 15.8              | 12.2           | 20.3           | 19.7              | 15.3           | 25.2           |
| Antigua and Barbuda        | 0.0               | 0.0            | 0.0            | 0.0               | 0.0            | 0.0            |
| Argentina                  | 4.6               | 4.5            | 4.7            | 5.8               | 5.5            | 6.2            |
| Armenia                    | 0.4               | 0.4            | 0.4            | 0.2               | 0.1            | 0.2            |
| Australia                  | 2.1               | 2.1            | 2.2            | 1.1               | 1.0            | 1.2            |
| Austria                    | 0.9               | 0.9            | 1.0            | 0.3               | 0.2            | 0.3            |
| Azerbaijan                 | 1.2               | 1.2            | 1.2            | 0.8               | 0.7            | 0.9            |
| Bahamas                    | 0.1               | 0.1            | 0.1            | 0.1               | 0.1            | 0.2            |
| Bahrain                    | 0.0               | 0.0            | 0.1            | 0.1               | 0.1            | 0.1            |
| Bangladesh                 | 50.6              | 46.0           | 56.1           | 36.3              | 26.9           | 50.0           |
| Barbados                   | 0.0               | 0.0            | 0.1            | 0.0               | 0.0            | 0.0            |
| Belarus                    | 1.6               | 1.5            | 1.6            | 0.3               | 0.3            | 0.4            |
| Belgium                    | 1.1               | 1.0            | 1.1            | 0.4               | 0.3            | 0.4            |
| Belize                     | 0.0               | 0.0            | 0.0            | 0.1               | 0.1            | 0.1            |
| Benin                      | 2.7               | 2.2            | 3.3            | 5.3               | 3.8            | 7.7            |
| Bhutan                     | 0.3               | 0.2            | 0.5            | 0.2               | 0.1            | 0.3            |
| Bolivia (Plurin. State of) | 3.1               | 2.6            | 3.7            | 2.2               | 1.1            | 4.4            |
| Bosnia and Herz.           | 0.5               | 0.5            | 0.5            | 0.2               | 0.1            | 0.2            |
| Botswana                   | 1.0               | 0.8            | 1.3            | 0.6               | 0.3            | 1.2            |
| Brazil                     | 39.0              | 38.1           | 39.9           | 46.2              | 41.3           | 51.5           |
| Brunei Darussalam          | 0.1               | 0.1            | 0.1            | 0.0               | 0.0            | 0.0            |
| Bulgaria                   | 1.0               | 1.0            | 1.0            | 0.3               | 0.3            | 0.4            |
| Burkina Faso               | 6.4               | 5.4            | 7.6            | 6.4               | 3.5            | 11.8           |
| Burundi                    | 5.9               | 3.4            | 9.9            | 3.9               | 2.4            | 6.5            |
| Cabo Verde                 | 0.1               | 0.1            | 0.1            | 0.1               | 0.0            | 0.1            |
| Cambodia                   | 6.4               | 5.1            | 8.1            | 2.5               | 1.3            | 4.6            |
| Cameroon                   | 6.7               | 5.7            | 7.8            | 15.3              | 11.2           | 20.9           |
| Canada                     | 3.0               | 3.0            | 3.1            | 2.1               | 2.0            | 2.2            |
| Central Afr. Rep.          | 2.4               | 2.0            | 2.9            | 3.5               | 1.6            | 8.4            |
| Chad                       | 5.3               | 4.4            | 6.3            | 11.5              | 7.5            | 17.7           |
| Chile                      | 2.1               | 2.0            | 2.1            | 1.4               | 1.1            | 1.8            |
| China                      | 222.2             | 179.3          | 285.1          | 66.4              | 39.3           | 110.2          |
| Colombia                   | 17.7              | 15.0           | 21.0           | 9.9               | 9.6            | 10.2           |
| Comoros                    | 0.2               | 0.1            | 0.3            | 0.1               | 0.1            | 0.3            |
| Congo                      | 2.6               | 1.6            | 4.3            | 1.6               | 0.9            | 2.8            |
| Cook Islands               | 0.0               | 0.0            | 0.0            | 0.0               | 0.0            | 0.0            |
| Costa Rica                 | 0.4               | 0.3            | 0.4            | 0.6               | 0.6            | 0.7            |
| Côte d'Ivoire              | 6.7               | 5.5            | 8.0            | 14.0              | 7.9            | 25.3           |
| Croatia                    | 0.5               | 0.5            | 0.5            | 0.2               | 0.1            | 0.2            |

| Country                     | 1990              |                |                | 2019              |                |                |
|-----------------------------|-------------------|----------------|----------------|-------------------|----------------|----------------|
|                             | Deaths<br>(15-24) | Lower<br>bound | Upper<br>bound | Deaths<br>(15-24) | Lower<br>bound | Upper<br>bound |
| Cuba                        | 2.4               | 2.3            | 2.4            | 0.7               | 0.6            | 0.7            |
| Cyprus                      | 0.1               | 0.1            | 0.1            | 0.1               | 0.0            | 0.1            |
| Czechia                     | 1.0               | 1.0            | 1.1            | 0.4               | 0.4            | 0.4            |
| Dem. People's Rep. of Korea | 6.9               | 5.4            | 8.8            | 3.6               | 2.8            | 4.6            |
| Dem. Rep. of the Congo      | 30.2              | 18.9           | 50.6           | 62.7              | 39.2           | 105.0          |
| Denmark                     | 0.4               | 0.4            | 0.4            | 0.2               | 0.2            | 0.2            |
| Djibouti                    | 0.5               | 0.4            | 0.6            | 0.5               | 0.4            | 0.6            |
| Dominica                    | 0.0               | 0.0            | 0.0            | 0.0               | 0.0            | 0.0            |
| Dominican Republic          | 1.9               | 1.3            | 2.7            | 2.4               | 1.3            | 4.3            |
| Ecuador                     | 3.0               | 2.9            | 3.1            | 3.2               | 1.7            | 6.2            |
| Egypt                       | 12.7              | 12.4           | 13.0           | 12.6              | 12.1           | 13.0           |
| El Salvador                 | 2.8               | 2.7            | 2.9            | 3.1               | 2.5            | 3.7            |
| Equatorial Guinea           | 0.3               | 0.2            | 0.4            | 0.6               | 0.5            | 0.8            |
| Eritrea                     | 2.2               | 1.7            | 2.8            | 1.4               | 1.1            | 1.7            |
| Estonia                     | 0.3               | 0.3            | 0.3            | 0.1               | 0.0            | 0.1            |
| Eswatini                    | 0.5               | 0.4            | 0.6            | 0.6               | 0.5            | 0.8            |
| Ethiopia                    | 83.3              | 68.1           | 102.3          | 40.2              | 26.4           | 61.4           |
| Fiji                        | 0.2               | 0.1            | 0.4            | 0.1               | 0.1            | 0.2            |
| Finland                     | 0.6               | 0.5            | 0.6            | 0.3               | 0.3            | 0.3            |
| France                      | 6.6               | 6.5            | 6.8            | 2.4               | 2.2            | 2.6            |
| Gabon                       | 0.4               | 0.3            | 0.5            | 0.6               | 0.3            | 1.1            |
| Gambia                      | 0.7               | 0.6            | 0.9            | 0.9               | 0.7            | 1.1            |
| Georgia                     | 0.8               | 0.8            | 0.8            | 0.3               | 0.3            | 0.4            |
| Germany                     | 7.3               | 7.1            | 7.5            | 2.3               | 2.2            | 2.5            |
| Ghana                       | 9.3               | 6.0            | 15.4           | 8.9               | 5.2            | 15.8           |
| Greece                      | 1.1               | 1.1            | 1.1            | 0.3               | 0.3            | 0.4            |
| Grenada                     | 0.0               | 0.0            | 0.0            | 0.0               | 0.0            | 0.0            |
| Guatemala                   | 3.6               | 3.5            | 3.7            | 5.5               | 5.0            | 6.1            |
| Guinea                      | 4.1               | 3.4            | 5.0            | 8.6               | 5.5            | 13.8           |
| Guinea-Bissau               | 0.8               | 0.6            | 1.0            | 0.9               | 0.7            | 1.2            |
| Guyana                      | 0.2               | 0.2            | 0.2            | 0.3               | 0.2            | 0.4            |
| Haiti                       | 5.3               | 4.2            | 6.8            | 4.0               | 2.7            | 6.1            |
| Honduras                    | 1.8               | 1.4            | 2.3            | 2.0               | 1.6            | 2.6            |
| Hungary                     | 1.2               | 1.2            | 1.3            | 0.4               | 0.3            | 0.4            |
| Iceland                     | 0.0               | 0.0            | 0.0            | 0.0               | 0.0            | 0.0            |
| India                       | 406.8             | 369.7          | 448.1          | 246.5             | 185.1          | 323.4          |
| Indonesia                   | 48.0              | 39.9           | 57.1           | 46.3              | 25.9           | 82.4           |
| Iran (Islamic Rep. of)      | 24.6              | 17.1           | 35.7           | 11.3              | 10.1           | 12.6           |
| Iraq                        | 4.0               | 3.1            | 5.1            | 7.4               | 5.8            | 9.5            |
| Ireland                     | 0.4               | 0.4            | 0.4            | 0.1               | 0.1            | 0.2            |
| Israel                      | 0.4               | 0.4            | 0.4            | 0.3               | 0.3            | 0.4            |
| Italy                       | 5.7               | 5.6            | 5.9            | 1.5               | 1.4            | 1.8            |
| Jamaica                     | 0.7               | 0.5            | 0.9            | 0.5               | 0.4            | 0.6            |

| Country                     | 1990              |                |                | 2019              |                |                |
|-----------------------------|-------------------|----------------|----------------|-------------------|----------------|----------------|
|                             | Deaths<br>(15-24) | Lower<br>bound | Upper<br>bound | Deaths<br>(15-24) | Lower<br>bound | Upper<br>bound |
| Japan                       | 9.1               | 8.9            | 9.3            | 3.0               | 2.9            | 3.2            |
| Jordan                      | 0.6               | 0.5            | 0.8            | 1.1               | 1.0            | 1.2            |
| Kazakhstan                  | 3.8               | 3.7            | 3.9            | 1.7               | 1.6            | 1.7            |
| Kenya                       | 10.8              | 8.9            | 13.1           | 17.4              | 10.3           | 28.7           |
| Kiribati                    | 0.0               | 0.0            | 0.0            | 0.0               | 0.0            | 0.0            |
| Kuwait                      | 0.4               | 0.4            | 0.5            | 0.3               | 0.2            | 0.3            |
| Kyrgyzstan                  | 0.9               | 0.9            | 1.0            | 0.7               | 0.6            | 0.7            |
| Lao People's Dem. Rep.      | 2.4               | 1.4            | 4.0            | 1.7               | 0.9            | 3.2            |
| Latvia                      | 0.5               | 0.5            | 0.6            | 0.1               | 0.1            | 0.1            |
| Lebanon                     | 1.3               | 1.0            | 1.7            | 0.6               | 0.5            | 0.8            |
| Lesotho                     | 1.0               | 0.6            | 1.6            | 1.2               | 0.7            | 1.9            |
| Liberia                     | 2.4               | 1.0            | 7.2            | 2.9               | 1.7            | 5.1            |
| Libya                       | 0.9               | 0.7            | 1.2            | 1.1               | 0.9            | 1.4            |
| Lithuania                   | 0.7               | 0.7            | 0.7            | 0.2               | 0.1            | 0.2            |
| Luxembourg                  | 0.0               | 0.0            | 0.1            | 0.0               | 0.0            | 0.0            |
| Madagascar                  | 7.1               | 5.9            | 8.6            | 12.6              | 6.6            | 25.2           |
| Malawi                      | 7.3               | 6.2            | 8.5            | 7.1               | 4.5            | 11.3           |
| Malaysia                    | 3.7               | 3.5            | 3.9            | 3.7               | 3.4            | 3.9            |
| Maldives                    | 0.1               | 0.0            | 0.1            | 0.0               | 0.0            | 0.1            |
| Mali                        | 6.0               | 5.1            | 7.2            | 8.4               | 6.3            | 11.8           |
| Malta                       | 0.0               | 0.0            | 0.0            | 0.0               | 0.0            | 0.0            |
| Marshall Islands            | 0.0               | 0.0            | 0.0            | 0.0               | 0.0            | 0.0            |
| Mauritania                  | 1.3               | 1.0            | 1.6            | 2.0               | 1.6            | 2.6            |
| Mauritius                   | 0.2               | 0.2            | 0.2            | 0.2               | 0.1            | 0.2            |
| Mexico                      | 20.3              | 19.8           | 20.7           | 25.6              | 23.7           | 27.6           |
| Micronesia (Fed. States of) | 0.0               | 0.0            | 0.0            | 0.0               | 0.0            | 0.0            |
| Monaco                      | 0.0               | 0.0            | 0.0            | 0.0               | 0.0            | 0.0            |
| Mongolia                    | 0.7               | 0.6            | 0.8            | 0.4               | 0.4            | 0.4            |
| Montenegro                  | 0.1               | 0.1            | 0.1            | 0.0               | 0.0            | 0.0            |
| Morocco                     | 6.5               | 5.1            | 8.3            | 4.5               | 3.5            | 5.8            |
| Mozambique                  | 9.7               | 7.9            | 11.9           | 18.7              | 10.3           | 34.5           |
| Myanmar                     | 23.2              | 16.0           | 38.2           | 8.9               | 5.3            | 14.6           |
| Namibia                     | 0.8               | 0.7            | 1.0            | 1.1               | 0.6            | 1.8            |
| Nauru                       | 0.0               | 0.0            | 0.0            | 0.0               | 0.0            | 0.0            |
| Nepal                       | 7.3               | 6.1            | 8.8            | 6.7               | 4.3            | 10.4           |
| Netherlands                 | 1.1               | 1.1            | 1.1            | 0.5               | 0.5            | 0.5            |
| New Zealand                 | 0.6               | 0.6            | 0.7            | 0.3               | 0.2            | 0.3            |
| Nicaragua                   | 1.6               | 1.2            | 2.1            | 1.2               | 0.9            | 1.5            |
| Niger                       | 5.7               | 4.6            | 6.9            | 12.0              | 7.0            | 21.1           |
| Nigeria                     | 67.7              | 50.9           | 95.4           | 73.3              | 57.0           | 94.9           |
| Niue                        | 0.0               | 0.0            | 0.0            | 0.0               | 0.0            | 0.0            |
| North Macedonia             | 0.2               | 0.2            | 0.2            | 0.1               | 0.1            | 0.1            |
| Norway                      | 0.4               | 0.4            | 0.4            | 0.2               | 0.2            | 0.3            |



| Country                   | 1990              |                |                | 2019              |                |                |
|---------------------------|-------------------|----------------|----------------|-------------------|----------------|----------------|
|                           | Deaths<br>(15-24) | Lower<br>bound | Upper<br>bound | Deaths<br>(15-24) | Lower<br>bound | Upper<br>bound |
| Oman                      | 0.3               | 0.2            | 0.4            | 0.4               | 0.3            | 0.5            |
| Pakistan                  | 44.2              | 37.8           | 51.9           | 49.2              | 26.3           | 93.3           |
| Palau                     | 0.0               | 0.0            | 0.0            | 0.0               | 0.0            | 0.0            |
| Panama                    | 0.6               | 0.5            | 0.6            | 0.6               | 0.6            | 0.7            |
| Papua New Guinea          | 1.9               | 1.5            | 2.4            | 2.6               | 2.0            | 3.3            |
| Paraguay                  | 1.3               | 1.0            | 1.7            | 1.4               | 1.1            | 1.9            |
| Peru                      | 9.0               | 7.9            | 10.5           | 3.4               | 1.8            | 6.4            |
| Philippines               | 17.7              | 16.2           | 19.3           | 18.4              | 15.5           | 21.9           |
| Poland                    | 4.6               | 4.5            | 4.7            | 1.8               | 1.7            | 1.8            |
| Portugal                  | 1.8               | 1.7            | 1.8            | 0.3               | 0.3            | 0.3            |
| Qatar                     | 0.0               | 0.0            | 0.1            | 0.1               | 0.1            | 0.1            |
| Republic of Korea         | 7.8               | 7.6            | 8.0            | 1.7               | 1.5            | 1.8            |
| Republic of Moldova       | 0.8               | 0.8            | 0.8            | 0.3               | 0.3            | 0.4            |
| Romania                   | 3.4               | 3.3            | 3.5            | 0.9               | 0.9            | 1.0            |
| Russian Federation        | 27.1              | 26.3           | 27.8           | 10.3              | 9.9            | 10.7           |
| Rwanda                    | 9.9               | 7.8            | 12.8           | 3.7               | 2.0            | 7.2            |
| Saint Kitts and Nevis     | 0.0               | 0.0            | 0.0            | 0.0               | 0.0            | 0.0            |
| Saint Lucia               | 0.0               | 0.0            | 0.0            | 0.0               | 0.0            | 0.0            |
| Saint Vincent and the Gr. | 0.0               | 0.0            | 0.0            | 0.0               | 0.0            | 0.0            |
| Samoa                     | 0.0               | 0.0            | 0.1            | 0.0               | 0.0            | 0.0            |
| San Marino                | 0.0               | 0.0            | 0.0            | 0.0               | 0.0            | 0.0            |
| Sao Tome and Principe     | 0.1               | 0.0            | 0.2            | 0.1               | 0.0            | 0.1            |
| Saudi Arabia              | 4.6               | 1.4            | 29.7           | 5.7               | 2.6            | 12.1           |
| Senegal                   | 3.6               | 3.1            | 4.3            | 6.2               | 3.9            | 10.0           |
| Serbia                    | 0.9               | 0.8            | 0.9            | 0.4               | 0.3            | 0.4            |
| Seychelles                | 0.0               | 0.0            | 0.0            | 0.0               | 0.0            | 0.0            |
| Sierra Leone              | 5.1               | 2.7            | 23.8           | 8.5               | 5.3            | 13.4           |
| Singapore                 | 0.3               | 0.3            | 0.4            | 0.2               | 0.1            | 0.2            |
| Slovakia                  | 0.6               | 0.5            | 0.6            | 0.2               | 0.2            | 0.3            |
| Slovenia                  | 0.3               | 0.2            | 0.3            | 0.1               | 0.1            | 0.1            |
| Solomon Islands           | 0.1               | 0.1            | 0.1            | 0.1               | 0.1            | 0.2            |
| Somalia                   | 9.5               | 7.4            | 12.3           | 13.9              | 10.8           | 17.9           |
| South Africa              | 15.0              | 11.6           | 19.3           | 19.9              | 17.0           | 23.4           |
| South Sudan               | 7.5               | 5.7            | 9.7            | 8.5               | 6.6            | 10.9           |
| Spain                     | 5.5               | 5.4            | 5.7            | 1.0               | 1.0            | 1.1            |
| Sri Lanka                 | 9.4               | 9.0            | 9.7            | 1.2               | 0.9            | 1.7            |
| State of Palestine        | 0.4               | 0.3            | 0.6            | 0.8               | 0.6            | 1.0            |
| Sudan                     | 21.2              | 16.5           | 27.4           | 23.8              | 18.6           | 30.7           |
| Suriname                  | 0.1               | 0.1            | 0.1            | 0.1               | 0.1            | 0.1            |
| Sweden                    | 0.6               | 0.6            | 0.6            | 0.4               | 0.4            | 0.4            |
| Switzerland               | 0.8               | 0.8            | 0.9            | 0.2               | 0.2            | 0.3            |
| Syrian Arab Republic      | 3.8               | 2.8            | 5.7            | 5.4               | 2.7            | 10.6           |
| Tajikistan                | 1.1               | 1.0            | 1.1            | 0.8               | 0.4            | 1.5            |

| Country                        | 1990              |                |                | 2019              |                |                |
|--------------------------------|-------------------|----------------|----------------|-------------------|----------------|----------------|
|                                | Deaths<br>(15-24) | Lower<br>bound | Upper<br>bound | Deaths<br>(15-24) | Lower<br>bound | Upper<br>bound |
| Thailand                       | 18.8              | 18.2           | 19.5           | 11.9              | 11.2           | 12.7           |
| Timor-Leste                    | 0.3               | 0.2            | 0.7            | 0.8               | 0.4            | 1.5            |
| Togo                           | 1.8               | 1.5            | 2.3            | 2.8               | 1.6            | 4.7            |
| Tonga                          | 0.0               | 0.0            | 0.0            | 0.0               | 0.0            | 0.0            |
| Trinidad and Tobago            | 0.2               | 0.2            | 0.2            | 0.2               | 0.1            | 0.3            |
| Tunisia                        | 1.4               | 1.1            | 1.7            | 1.2               | 1.1            | 1.4            |
| Turkey                         | 29.9              | 8.5            | 122.4          | 5.8               | 5.6            | 6.0            |
| Turkmenistan                   | 0.9               | 0.9            | 0.9            | 1.0               | 0.8            | 1.2            |
| Tuvalu                         | 0.0               | 0.0            | 0.0            | 0.0               | 0.0            | 0.0            |
| Uganda                         | 16.1              | 13.7           | 18.9           | 25.4              | 17.2           | 39.3           |
| Ukraine                        | 8.0               | 7.8            | 8.2            | 2.6               | 2.5            | 2.7            |
| United Arab Emirates           | 0.2               | 0.2            | 0.3            | 0.6               | 0.5            | 0.8            |
| United Kingdom                 | 4.8               | 4.7            | 5.0            | 2.5               | 2.4            | 2.7            |
| United Rep. of Tanzania        | 14.2              | 11.6           | 17.2           | 19.8              | 12.2           | 34.3           |
| United States                  | 37.2              | 36.3           | 38.1           | 34.4              | 30.7           | 38.4           |
| Uruguay                        | 0.4               | 0.4            | 0.4            | 0.5               | 0.4            | 0.5            |
| Uzbekistan                     | 4.3               | 4.2            | 4.4            | 4.4               | 3.6            | 5.3            |
| Vanuatu                        | 0.0               | 0.0            | 0.0            | 0.1               | 0.0            | 0.1            |
| Venezuela (Bolivarian Rep. of) | 4.8               | 4.7            | 5.0            | 12.1              | 10.3           | 14.3           |
| Viet Nam                       | 19.6              | 13.3           | 27.9           | 9.1               | 4.8            | 17.4           |
| Yemen                          | 3.4               | 2.6            | 4.3            | 15.3              | 11.9           | 19.6           |
| Zambia                         | 7.8               | 6.7            | 9.1            | 8.1               | 5.8            | 11.2           |
| Zimbabwe                       | 4.6               | 3.9            | 5.4            | 7.0               | 4.8            | 10.4           |

Table S10 – Number of deaths among youth aged 15-24 (thousands) in 1990 and 2019

| Country                    | 1990              |                |                | 2019              |                |                |
|----------------------------|-------------------|----------------|----------------|-------------------|----------------|----------------|
|                            | Deaths<br>(15-19) | Lower<br>bound | Upper<br>bound | Deaths<br>(15-19) | Lower<br>bound | Upper<br>bound |
| Afghanistan                | 4.5               | 3.0            | 6.5            | 12.4              | 8.2            | 17.6           |
| Albania                    | 0.2               | 0.2            | 0.2            | 0.1               | 0.1            | 0.1            |
| Algeria                    | 2.9               | 2.7            | 3.2            | 1.5               | 1.5            | 1.6            |
| Andorra                    | 0.0               | 0.0            | 0.0            | 0.0               | 0.0            | 0.0            |
| Angola                     | 7.4               | 5.7            | 9.4            | 8.7               | 6.8            | 11.1           |
| Antigua and Barbuda        | 0.0               | 0.0            | 0.0            | 0.0               | 0.0            | 0.0            |
| Argentina                  | 2.1               | 2.0            | 2.1            | 2.4               | 2.3            | 2.5            |
| Armenia                    | 0.2               | 0.1            | 0.2            | 0.1               | 0.1            | 0.1            |
| Australia                  | 0.9               | 0.9            | 0.9            | 0.4               | 0.4            | 0.5            |
| Austria                    | 0.4               | 0.4            | 0.4            | 0.1               | 0.1            | 0.1            |
| Azerbaijan                 | 0.5               | 0.5            | 0.5            | 0.3               | 0.3            | 0.4            |
| Bahamas                    | 0.0               | 0.0            | 0.0            | 0.0               | 0.0            | 0.0            |
| Bahrain                    | 0.0               | 0.0            | 0.0            | 0.0               | 0.0            | 0.0            |
| Bangladesh                 | 22.4              | 18.6           | 25.4           | 20.3              | 15.0           | 27.8           |
| Barbados                   | 0.0               | 0.0            | 0.0            | 0.0               | 0.0            | 0.0            |
| Belarus                    | 0.6               | 0.6            | 0.6            | 0.1               | 0.1            | 0.1            |
| Belgium                    | 0.4               | 0.4            | 0.4            | 0.1               | 0.1            | 0.1            |
| Belize                     | 0.0               | 0.0            | 0.0            | 0.0               | 0.0            | 0.0            |
| Benin                      | 1.5               | 1.1            | 1.9            | 2.8               | 1.9            | 4.1            |
| Bhutan                     | 0.2               | 0.1            | 0.3            | 0.1               | 0.0            | 0.1            |
| Bolivia (Plurin. State of) | 1.6               | 1.3            | 2.0            | 1.0               | 0.6            | 1.6            |
| Bosnia and Herz.           | 0.2               | 0.2            | 0.2            | 0.1               | 0.0            | 0.1            |
| Botswana                   | 0.4               | 0.3            | 0.5            | 0.2               | 0.1            | 0.3            |
| Brazil                     | 16.1              | 15.8           | 16.5           | 19.1              | 17.8           | 20.4           |
| Brunei Darussalam          | 0.0               | 0.0            | 0.0            | 0.0               | 0.0            | 0.0            |
| Bulgaria                   | 0.4               | 0.4            | 0.5            | 0.1               | 0.1            | 0.2            |
| Burkina Faso               | 3.4               | 2.8            | 4.2            | 2.7               | 1.6            | 4.2            |
| Burundi                    | 2.5               | 1.8            | 3.6            | 2.1               | 1.4            | 2.9            |
| Cabo Verde                 | 0.0               | 0.0            | 0.0            | 0.0               | 0.0            | 0.0            |
| Cambodia                   | 3.2               | 2.4            | 4.4            | 1.0               | 0.6            | 1.7            |
| Cameroon                   | 3.3               | 2.7            | 3.9            | 6.8               | 4.7            | 10.0           |
| Canada                     | 1.3               | 1.3            | 1.3            | 0.7               | 0.7            | 0.7            |
| Central Afr. Rep.          | 1.0               | 0.8            | 1.3            | 1.3               | 0.7            | 2.3            |
| Chad                       | 3.2               | 2.4            | 4.1            | 5.6               | 3.6            | 8.4            |
| Chile                      | 0.8               | 0.8            | 0.9            | 0.5               | 0.5            | 0.6            |
| China                      | 126.2             | 107.2          | 148.9          | 22.3              | 16.0           | 29.7           |
| Colombia                   | 6.6               | 5.9            | 7.3            | 3.8               | 3.7            | 4.0            |
| Comoros                    | 0.1               | 0.1            | 0.2            | 0.1               | 0.0            | 0.1            |
| Congo                      | 1.3               | 0.7            | 2.1            | 0.6               | 0.3            | 1.1            |
| Cook Islands               | 0.0               | 0.0            | 0.0            | 0.0               | 0.0            | 0.0            |
| Costa Rica                 | 0.2               | 0.1            | 0.2            | 0.2               | 0.2            | 0.2            |
| Côte d'Ivoire              | 2.9               | 2.2            | 3.8            | 6.3               | 3.5            | 10.3           |
| Croatia                    | 0.2               | 0.2            | 0.2            | 0.1               | 0.0            | 0.1            |

| Country                     | 1990              |                |                | 2019              |                |                |
|-----------------------------|-------------------|----------------|----------------|-------------------|----------------|----------------|
|                             | Deaths<br>(15-19) | Lower<br>bound | Upper<br>bound | Deaths<br>(15-19) | Lower<br>bound | Upper<br>bound |
| Cuba                        | 1.0               | 1.0            | 1.1            | 0.3               | 0.2            | 0.3            |
| Cyprus                      | 0.0               | 0.0            | 0.0            | 0.0               | 0.0            | 0.0            |
| Czechia                     | 0.5               | 0.5            | 0.5            | 0.1               | 0.1            | 0.2            |
| Dem. People's Rep. of Korea | 3.0               | 2.4            | 3.9            | 1.5               | 1.2            | 2.0            |
| Dem. Rep. of the Congo      | 14.0              | 7.4            | 20.4           | 33.1              | 20.7           | 49.4           |
| Denmark                     | 0.2               | 0.1            | 0.2            | 0.1               | 0.1            | 0.1            |
| Djibouti                    | 0.2               | 0.2            | 0.3            | 0.2               | 0.2            | 0.3            |
| Dominica                    | 0.0               | 0.0            | 0.0            | 0.0               | 0.0            | 0.0            |
| Dominican Republic          | 1.0               | 0.6            | 1.4            | 0.8               | 0.5            | 1.3            |
| Ecuador                     | 1.3               | 1.3            | 1.4            | 1.2               | 0.7            | 1.8            |
| Egypt                       | 6.4               | 6.3            | 6.6            | 6.1               | 5.9            | 6.2            |
| El Salvador                 | 1.1               | 1.1            | 1.1            | 1.4               | 1.3            | 1.6            |
| Equatorial Guinea           | 0.1               | 0.1            | 0.2            | 0.3               | 0.2            | 0.3            |
| Eritrea                     | 1.0               | 0.7            | 1.2            | 0.6               | 0.5            | 0.8            |
| Estonia                     | 0.1               | 0.1            | 0.1            | 0.0               | 0.0            | 0.0            |
| Eswatini                    | 0.2               | 0.2            | 0.3            | 0.3               | 0.2            | 0.3            |
| Ethiopia                    | 38.5              | 28.9           | 51.0           | 20.6              | 12.6           | 29.8           |
| Fiji                        | 0.1               | 0.0            | 0.1            | 0.1               | 0.0            | 0.1            |
| Finland                     | 0.2               | 0.2            | 0.2            | 0.1               | 0.1            | 0.1            |
| France                      | 2.4               | 2.3            | 2.4            | 0.9               | 0.8            | 0.9            |
| Gabon                       | 0.2               | 0.1            | 0.3            | 0.3               | 0.1            | 0.5            |
| Gambia                      | 0.3               | 0.3            | 0.4            | 0.4               | 0.3            | 0.5            |
| Georgia                     | 0.3               | 0.3            | 0.3            | 0.1               | 0.1            | 0.1            |
| Germany                     | 2.5               | 2.5            | 2.6            | 0.9               | 0.9            | 1.0            |
| Ghana                       | 4.0               | 2.1            | 6.9            | 4.6               | 2.8            | 6.9            |
| Greece                      | 0.4               | 0.4            | 0.4            | 0.1               | 0.1            | 0.1            |
| Grenada                     | 0.0               | 0.0            | 0.0            | 0.0               | 0.0            | 0.0            |
| Guatemala                   | 1.6               | 1.5            | 1.6            | 2.5               | 2.3            | 2.6            |
| Guinea                      | 2.4               | 1.8            | 3.1            | 3.9               | 2.5            | 5.8            |
| Guinea-Bissau               | 0.4               | 0.3            | 0.5            | 0.4               | 0.3            | 0.6            |
| Guyana                      | 0.1               | 0.1            | 0.1            | 0.1               | 0.1            | 0.1            |
| Haiti                       | 2.5               | 1.7            | 3.4            | 1.6               | 0.9            | 2.5            |
| Honduras                    | 0.8               | 0.6            | 1.0            | 0.8               | 0.7            | 1.1            |
| Hungary                     | 0.5               | 0.5            | 0.5            | 0.1               | 0.1            | 0.1            |
| Iceland                     | 0.0               | 0.0            | 0.0            | 0.0               | 0.0            | 0.0            |
| India                       | 186.5             | 171.3          | 203.2          | 99.8              | 82.9           | 116.6          |
| Indonesia                   | 26.2              | 21.4           | 32.4           | 22.1              | 14.3           | 31.6           |
| Iran (Islamic Rep. of)      | 13.0              | 9.8            | 16.6           | 5.1               | 4.8            | 5.5            |
| Iraq                        | 2.1               | 1.6            | 2.7            | 3.5               | 2.8            | 4.5            |
| Ireland                     | 0.2               | 0.2            | 0.2            | 0.1               | 0.0            | 0.1            |
| Israel                      | 0.2               | 0.2            | 0.2            | 0.2               | 0.1            | 0.2            |
| Italy                       | 2.4               | 2.3            | 2.4            | 0.6               | 0.6            | 0.7            |
| Jamaica                     | 0.3               | 0.2            | 0.4            | 0.2               | 0.1            | 0.2            |

| Country                     | 1990              |                |                | 2019              |                |                |
|-----------------------------|-------------------|----------------|----------------|-------------------|----------------|----------------|
|                             | Deaths<br>(15-19) | Lower<br>bound | Upper<br>bound | Deaths<br>(15-19) | Lower<br>bound | Upper<br>bound |
| Japan                       | 4.4               | 4.3            | 4.5            | 1.1               | 1.0            | 1.1            |
| Jordan                      | 0.3               | 0.2            | 0.4            | 0.5               | 0.4            | 0.5            |
| Kazakhstan                  | 1.5               | 1.5            | 1.6            | 0.6               | 0.6            | 0.7            |
| Kenya                       | 4.7               | 3.6            | 6.2            | 7.5               | 4.7            | 11.1           |
| Kiribati                    | 0.0               | 0.0            | 0.0            | 0.0               | 0.0            | 0.0            |
| Kuwait                      | 0.2               | 0.2            | 0.2            | 0.1               | 0.1            | 0.1            |
| Kyrgyzstan                  | 0.4               | 0.4            | 0.4            | 0.3               | 0.2            | 0.3            |
| Lao People's Dem. Rep.      | 1.6               | 0.5            | 2.5            | 0.7               | 0.3            | 1.3            |
| Latvia                      | 0.2               | 0.2            | 0.2            | 0.0               | 0.0            | 0.0            |
| Lebanon                     | 0.6               | 0.4            | 0.7            | 0.3               | 0.2            | 0.3            |
| Lesotho                     | 0.5               | 0.3            | 0.8            | 0.4               | 0.3            | 0.7            |
| Liberia                     | 0.8               | 0.2            | 2.7            | 2.0               | 1.1            | 2.9            |
| Libya                       | 0.5               | 0.4            | 0.6            | 0.5               | 0.4            | 0.6            |
| Lithuania                   | 0.3               | 0.3            | 0.3            | 0.1               | 0.1            | 0.1            |
| Luxembourg                  | 0.0               | 0.0            | 0.0            | 0.0               | 0.0            | 0.0            |
| Madagascar                  | 3.5               | 2.7            | 4.6            | 6.4               | 3.6            | 10.0           |
| Malawi                      | 3.7               | 3.0            | 4.4            | 3.0               | 1.9            | 4.3            |
| Malaysia                    | 1.6               | 1.5            | 1.7            | 1.6               | 1.6            | 1.7            |
| Maldives                    | 0.0               | 0.0            | 0.0            | 0.0               | 0.0            | 0.0            |
| Mali                        | 3.3               | 2.6            | 4.2            | 4.3               | 2.9            | 6.3            |
| Malta                       | 0.0               | 0.0            | 0.0            | 0.0               | 0.0            | 0.0            |
| Marshall Islands            | 0.0               | 0.0            | 0.0            | 0.0               | 0.0            | 0.0            |
| Mauritania                  | 0.6               | 0.5            | 0.8            | 0.9               | 0.7            | 1.2            |
| Mauritius                   | 0.1               | 0.1            | 0.1            | 0.1               | 0.1            | 0.1            |
| Mexico                      | 9.0               | 8.8            | 9.2            | 9.8               | 9.5            | 10.2           |
| Micronesia (Fed. States of) | 0.0               | 0.0            | 0.0            | 0.0               | 0.0            | 0.0            |
| Monaco                      | 0.0               | 0.0            | 0.0            | 0.0               | 0.0            | 0.0            |
| Mongolia                    | 0.3               | 0.3            | 0.3            | 0.2               | 0.2            | 0.2            |
| Montenegro                  | 0.0               | 0.0            | 0.0            | 0.0               | 0.0            | 0.0            |
| Morocco                     | 3.2               | 2.5            | 4.1            | 2.1               | 1.6            | 2.7            |
| Mozambique                  | 5.5               | 4.0            | 7.4            | 6.6               | 3.3            | 11.6           |
| Myanmar                     | 13.0              | 8.3            | 21.2           | 3.4               | 2.1            | 5.3            |
| Namibia                     | 0.4               | 0.3            | 0.5            | 0.4               | 0.2            | 0.5            |
| Nauru                       | 0.0               | 0.0            | 0.0            | 0.0               | 0.0            | 0.0            |
| Nepal                       | 3.9               | 3.0            | 5.1            | 2.9               | 1.8            | 4.5            |
| Netherlands                 | 0.4               | 0.4            | 0.5            | 0.2               | 0.2            | 0.2            |
| New Zealand                 | 0.3               | 0.3            | 0.3            | 0.1               | 0.1            | 0.1            |
| Nicaragua                   | 0.7               | 0.6            | 0.9            | 0.5               | 0.4            | 0.6            |
| Niger                       | 3.1               | 2.4            | 3.9            | 5.2               | 3.0            | 8.3            |
| Nigeria                     | 34.0              | 23.7           | 47.1           | 36.4              | 26.0           | 51.3           |
| Niue                        | 0.0               | 0.0            | 0.0            | 0.0               | 0.0            | 0.0            |
| North Macedonia             | 0.1               | 0.1            | 0.1            | 0.0               | 0.0            | 0.0            |
| Norway                      | 0.2               | 0.2            | 0.2            | 0.1               | 0.1            | 0.1            |

| Country                   | 1990              |                |                | 2019              |                |                |
|---------------------------|-------------------|----------------|----------------|-------------------|----------------|----------------|
|                           | Deaths<br>(15-19) | Lower<br>bound | Upper<br>bound | Deaths<br>(15-19) | Lower<br>bound | Upper<br>bound |
| Oman                      | 0.1               | 0.1            | 0.2            | 0.1               | 0.1            | 0.2            |
| Pakistan                  | 22.8              | 19.0           | 27.5           | 26.2              | 15.8           | 40.3           |
| Palau                     | 0.0               | 0.0            | 0.0            | 0.0               | 0.0            | 0.0            |
| Panama                    | 0.3               | 0.2            | 0.3            | 0.2               | 0.2            | 0.3            |
| Papua New Guinea          | 0.9               | 0.7            | 1.2            | 1.2               | 0.9            | 1.5            |
| Paraguay                  | 0.6               | 0.4            | 0.7            | 0.6               | 0.4            | 0.7            |
| Peru                      | 4.5               | 3.8            | 5.3            | 1.1               | 0.6            | 1.8            |
| Philippines               | 7.1               | 6.6            | 7.7            | 7.0               | 6.3            | 7.7            |
| Poland                    | 2.0               | 1.9            | 2.0            | 0.6               | 0.6            | 0.6            |
| Portugal                  | 0.8               | 0.8            | 0.8            | 0.1               | 0.1            | 0.1            |
| Qatar                     | 0.0               | 0.0            | 0.0            | 0.0               | 0.0            | 0.0            |
| Republic of Korea         | 3.4               | 3.3            | 3.5            | 0.6               | 0.5            | 0.6            |
| Republic of Moldova       | 0.3               | 0.3            | 0.3            | 0.1               | 0.1            | 0.1            |
| Romania                   | 1.4               | 1.4            | 1.5            | 0.4               | 0.4            | 0.4            |
| Russian Federation        | 11.2              | 11.0           | 11.5           | 3.9               | 3.8            | 4.0            |
| Rwanda                    | 5.3               | 4.0            | 7.1            | 1.6               | 0.9            | 2.3            |
| Saint Kitts and Nevis     | 0.0               | 0.0            | 0.0            | 0.0               | 0.0            | 0.0            |
| Saint Lucia               | 0.0               | 0.0            | 0.0            | 0.0               | 0.0            | 0.0            |
| Saint Vincent and the Gr. | 0.0               | 0.0            | 0.0            | 0.0               | 0.0            | 0.0            |
| Samoa                     | 0.0               | 0.0            | 0.0            | 0.0               | 0.0            | 0.0            |
| San Marino                | 0.0               | 0.0            | 0.0            | 0.0               | 0.0            | 0.0            |
| Sao Tome and Principe     | 0.0               | 0.0            | 0.1            | 0.0               | 0.0            | 0.0            |
| Saudi Arabia              | 2.3               | 0.7            | 4.0            | 2.4               | 1.3            | 3.8            |
| Senegal                   | 1.9               | 1.5            | 2.5            | 3.5               | 2.3            | 4.9            |
| Serbia                    | 0.4               | 0.4            | 0.4            | 0.1               | 0.1            | 0.2            |
| Seychelles                | 0.0               | 0.0            | 0.0            | 0.0               | 0.0            | 0.0            |
| Sierra Leone              | 2.9               | 1.4            | 4.7            | 4.3               | 2.7            | 6.2            |
| Singapore                 | 0.1               | 0.1            | 0.1            | 0.1               | 0.0            | 0.1            |
| Slovakia                  | 0.3               | 0.2            | 0.3            | 0.1               | 0.1            | 0.1            |
| Slovenia                  | 0.1               | 0.1            | 0.1            | 0.0               | 0.0            | 0.0            |
| Solomon Islands           | 0.0               | 0.0            | 0.1            | 0.1               | 0.0            | 0.1            |
| Somalia                   | 4.1               | 3.2            | 5.3            | 6.1               | 4.8            | 7.9            |
| South Africa              | 6.1               | 4.5            | 8.6            | 7.5               | 6.6            | 8.4            |
| South Sudan               | 3.3               | 2.6            | 4.2            | 3.6               | 2.8            | 4.7            |
| Spain                     | 2.2               | 2.1            | 2.2            | 0.4               | 0.4            | 0.4            |
| Sri Lanka                 | 3.2               | 3.1            | 3.3            | 0.5               | 0.4            | 0.6            |
| State of Palestine        | 0.2               | 0.2            | 0.3            | 0.4               | 0.3            | 0.4            |
| Sudan                     | 9.3               | 7.3            | 12.0           | 10.3              | 8.0            | 13.2           |
| Suriname                  | 0.0               | 0.0            | 0.1            | 0.0               | 0.0            | 0.0            |
| Sweden                    | 0.3               | 0.2            | 0.3            | 0.1               | 0.1            | 0.1            |
| Switzerland               | 0.3               | 0.3            | 0.3            | 0.1               | 0.1            | 0.1            |
| Syrian Arab Republic      | 2.4               | 1.9            | 3.0            | 2.2               | 1.7            | 2.7            |
| Tajikistan                | 0.5               | 0.4            | 0.5            | 0.3               | 0.2            | 0.4            |

| Country                        | 1990              |                |                | 2019              |                |                |
|--------------------------------|-------------------|----------------|----------------|-------------------|----------------|----------------|
|                                | Deaths<br>(15-19) | Lower<br>bound | Upper<br>bound | Deaths<br>(15-19) | Lower<br>bound | Upper<br>bound |
| Thailand                       | 8.5               | 8.2            | 8.7            | 5.4               | 5.2            | 5.7            |
| Timor-Leste                    | 0.1               | 0.1            | 0.3            | 0.5               | 0.3            | 0.7            |
| Togo                           | 1.0               | 0.7            | 1.3            | 1.3               | 0.8            | 1.9            |
| Tonga                          | 0.0               | 0.0            | 0.0            | 0.0               | 0.0            | 0.0            |
| Trinidad and Tobago            | 0.1               | 0.1            | 0.1            | 0.1               | 0.0            | 0.1            |
| Tunisia                        | 0.6               | 0.5            | 0.7            | 0.5               | 0.4            | 0.5            |
| Turkey                         | 16.8              | 6.1            | 26.3           | 2.7               | 2.6            | 2.8            |
| Turkmenistan                   | 0.4               | 0.4            | 0.4            | 0.4               | 0.4            | 0.5            |
| Tuvalu                         | 0.0               | 0.0            | 0.0            | 0.0               | 0.0            | 0.0            |
| Uganda                         | 6.8               | 5.5            | 8.4            | 13.7              | 9.3            | 19.3           |
| Ukraine                        | 3.2               | 3.1            | 3.3            | 0.9               | 0.9            | 1.0            |
| United Arab Emirates           | 0.1               | 0.1            | 0.1            | 0.2               | 0.1            | 0.2            |
| United Kingdom                 | 2.0               | 1.9            | 2.0            | 1.0               | 0.9            | 1.0            |
| United Rep. of Tanzania        | 7.3               | 5.9            | 8.8            | 8.8               | 6.0            | 12.7           |
| United States                  | 15.8              | 15.5           | 16.1           | 11.3              | 10.6           | 12.1           |
| Uruguay                        | 0.2               | 0.2            | 0.2            | 0.2               | 0.2            | 0.2            |
| Uzbekistan                     | 1.8               | 1.8            | 1.9            | 1.9               | 1.7            | 2.1            |
| Vanuatu                        | 0.0               | 0.0            | 0.0            | 0.0               | 0.0            | 0.0            |
| Venezuela (Bolivarian Rep. of) | 2.1               | 2.1            | 2.2            | 5.3               | 4.8            | 5.9            |
| Viet Nam                       | 9.4               | 6.1            | 13.7           | 3.8               | 2.3            | 6.2            |
| Yemen                          | 1.8               | 1.4            | 2.3            | 6.8               | 5.3            | 8.7            |
| Zambia                         | 3.3               | 2.7            | 4.2            | 3.8               | 2.7            | 5.5            |
| Zimbabwe                       | 1.8               | 1.5            | 2.2            | 3.1               | 2.3            | 4.3            |

Table S11 – *Number of deaths among adolescents aged 15-19 (thousands) in 1990 and 2019*

5 COUNTRY-SPECIFIC TRENDS IN THE PROBABILITY  $10q_{15}$ 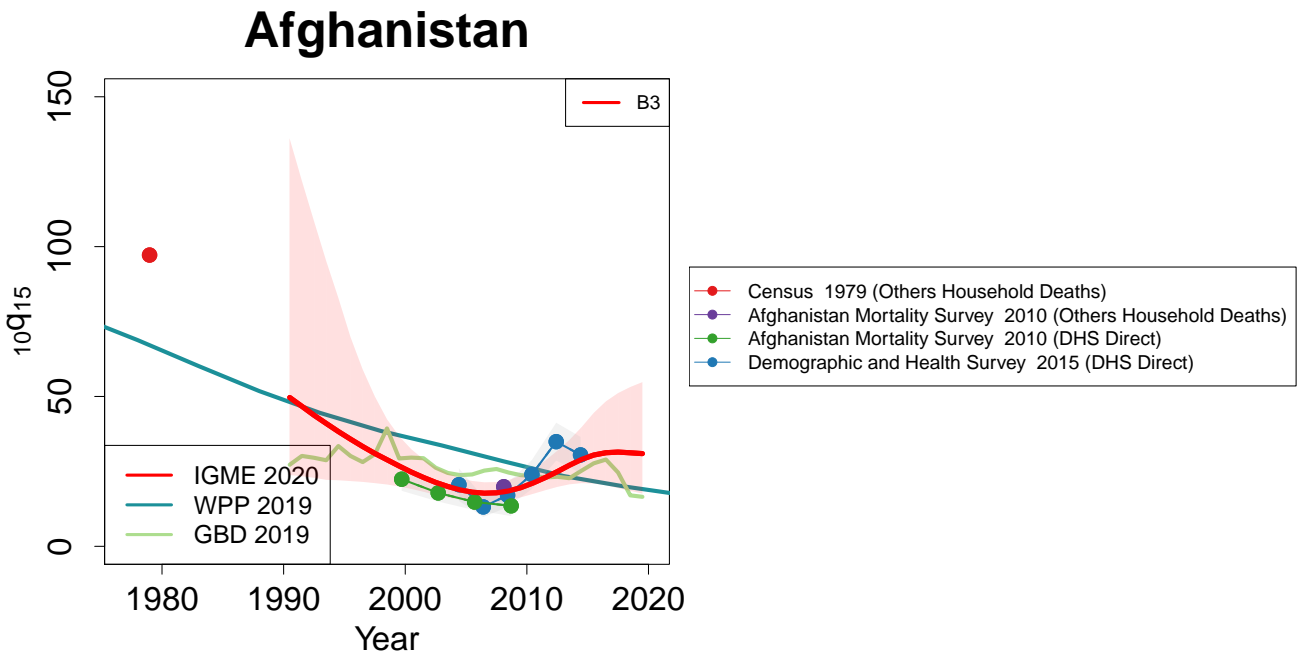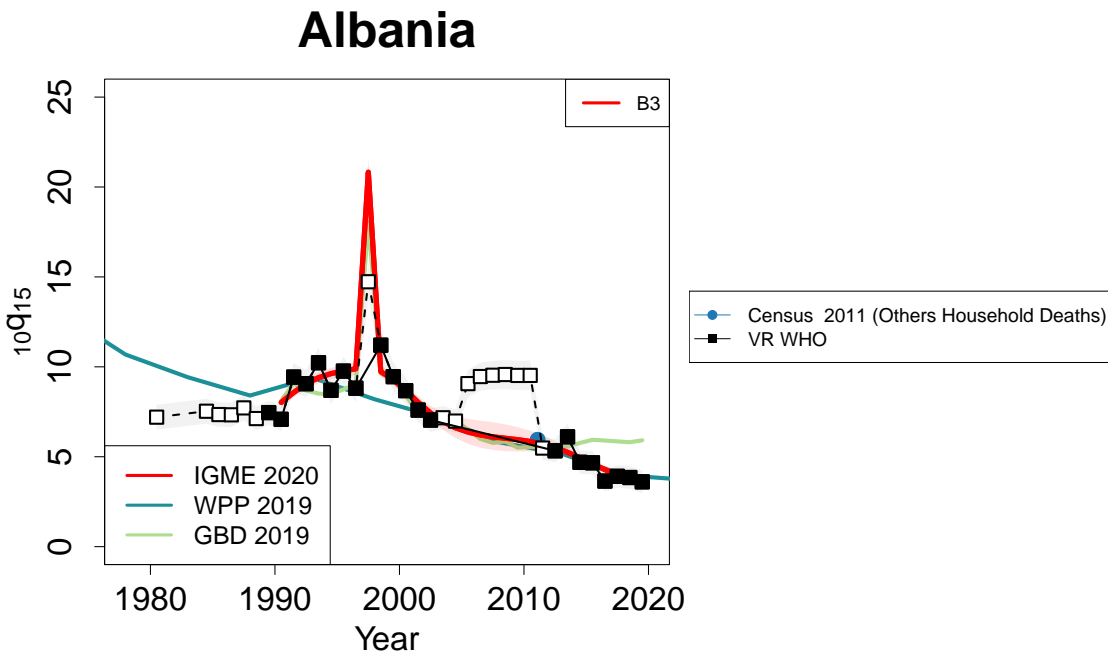



## Algeria

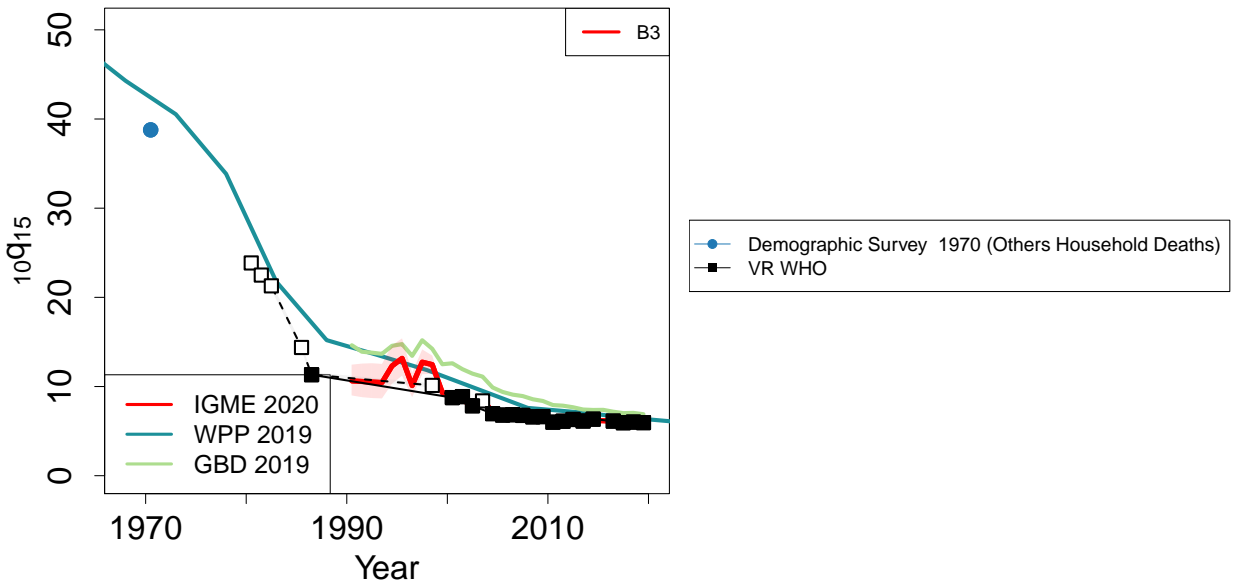

## Andorra

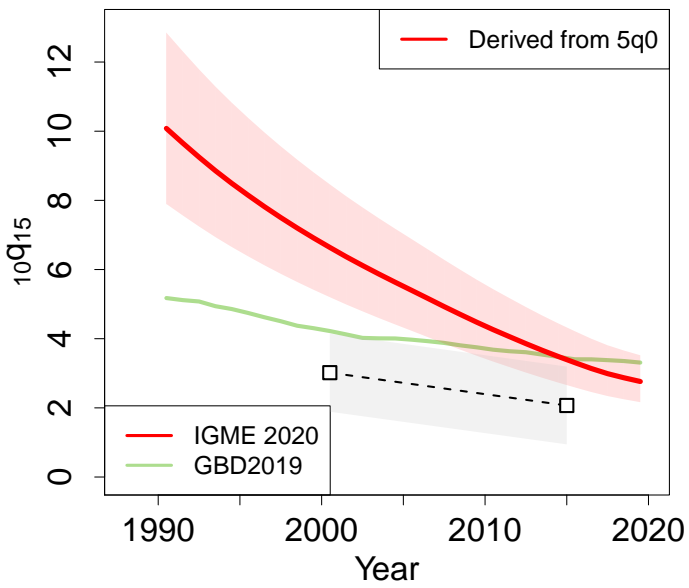

## Angola

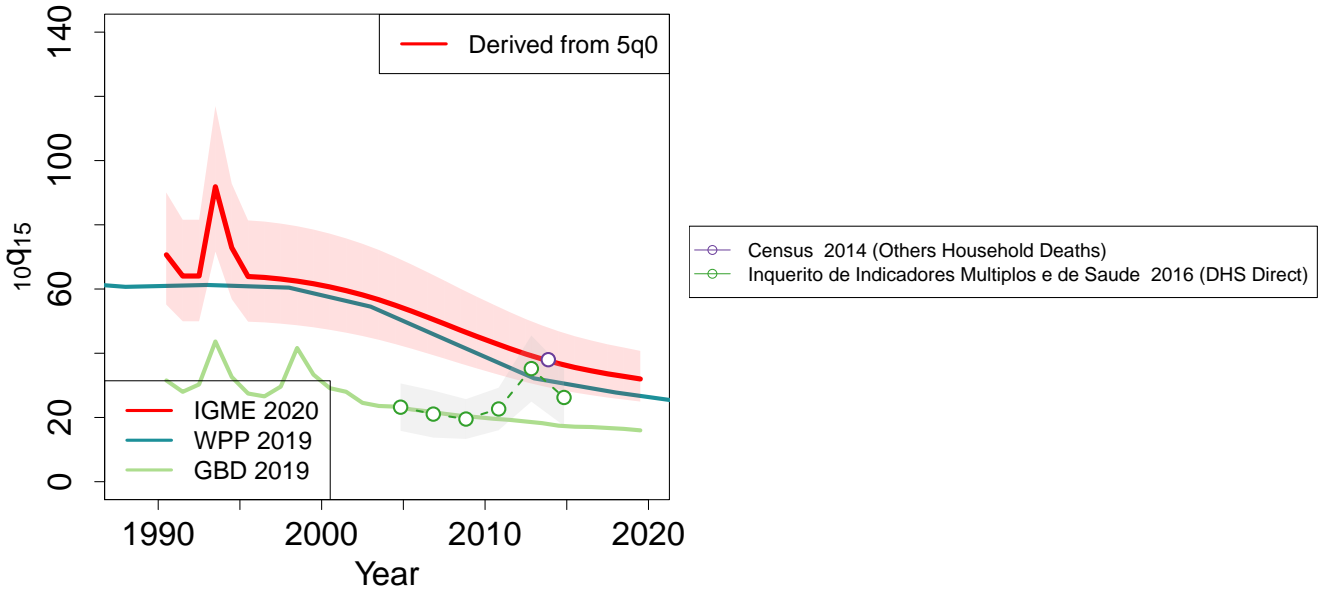

## Antigua & Barbuda

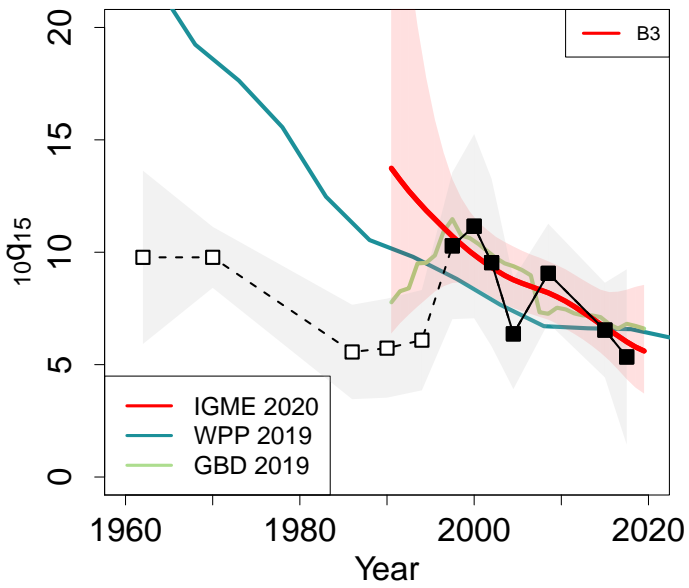

## Argentina

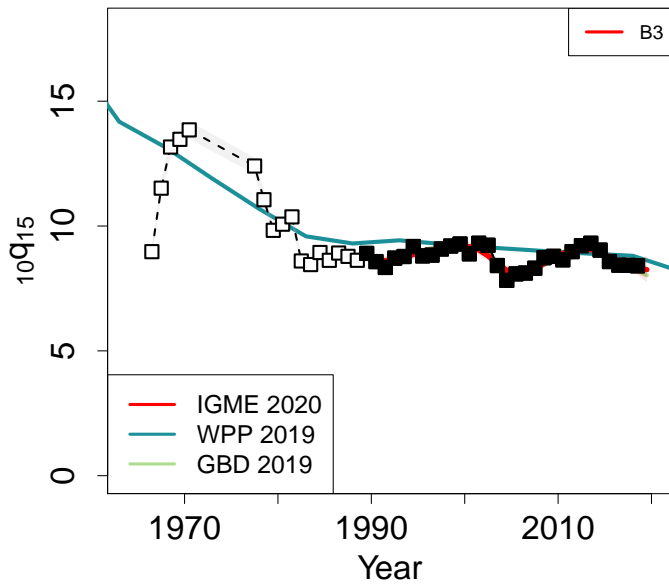

## Armenia

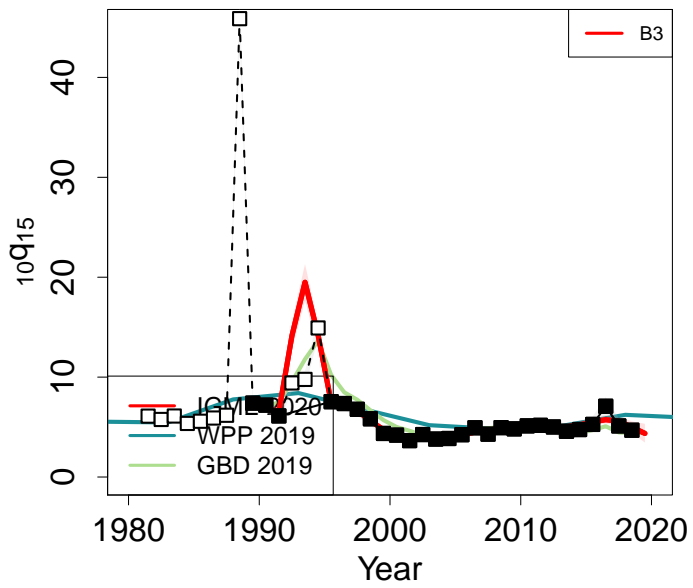

## Australia

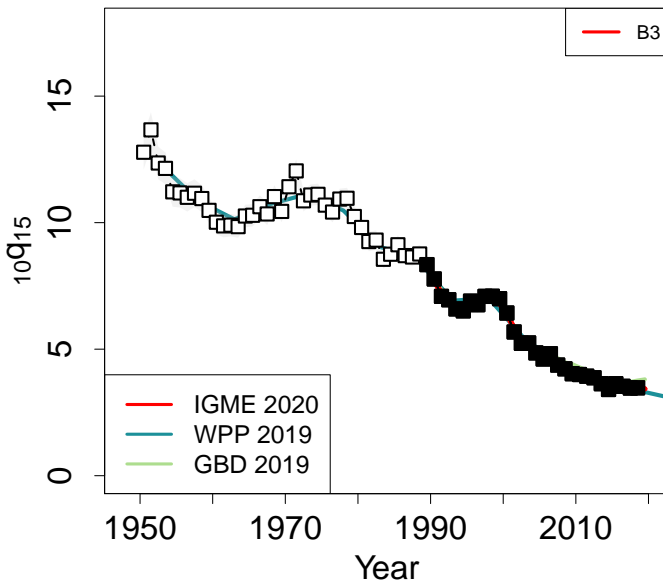

## Austria

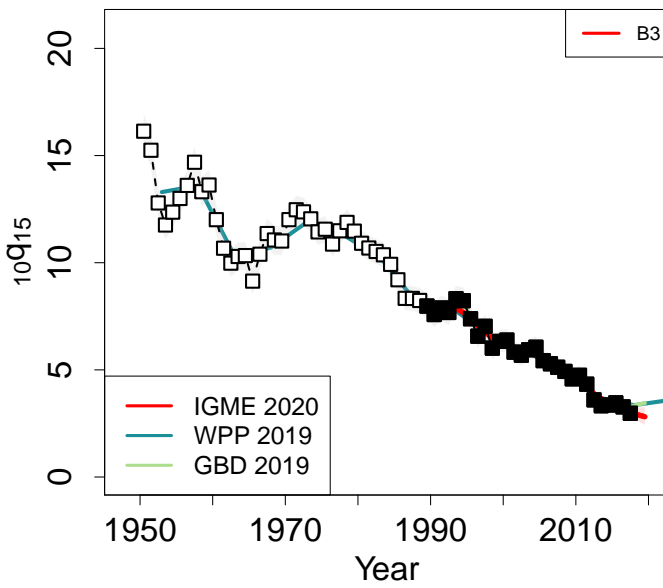

## Azerbaijan

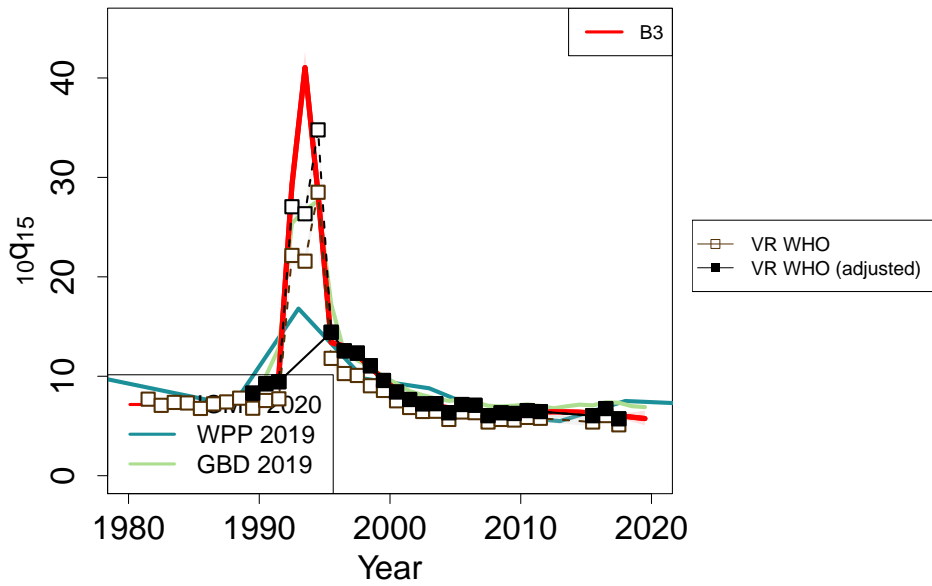

## Bahamas

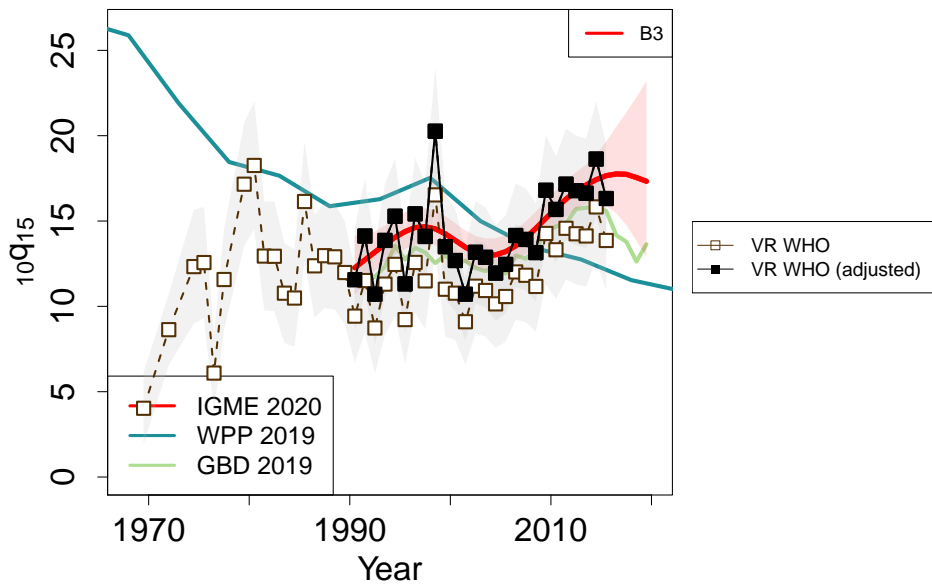

## Bahrain

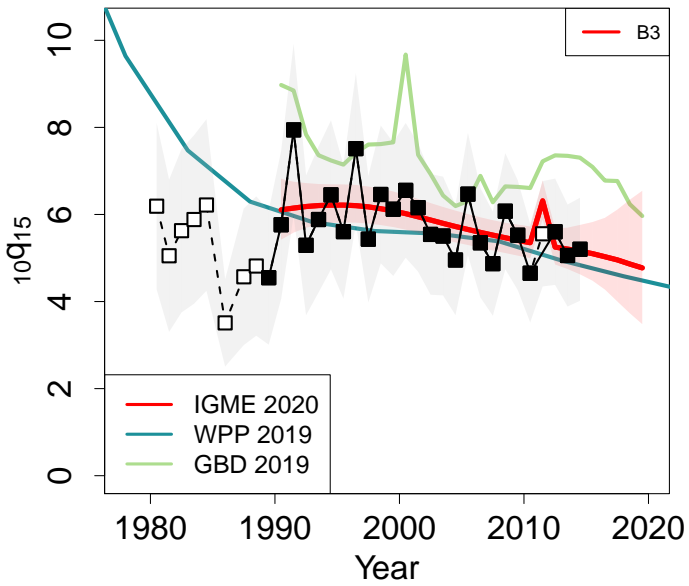

## Bangladesh

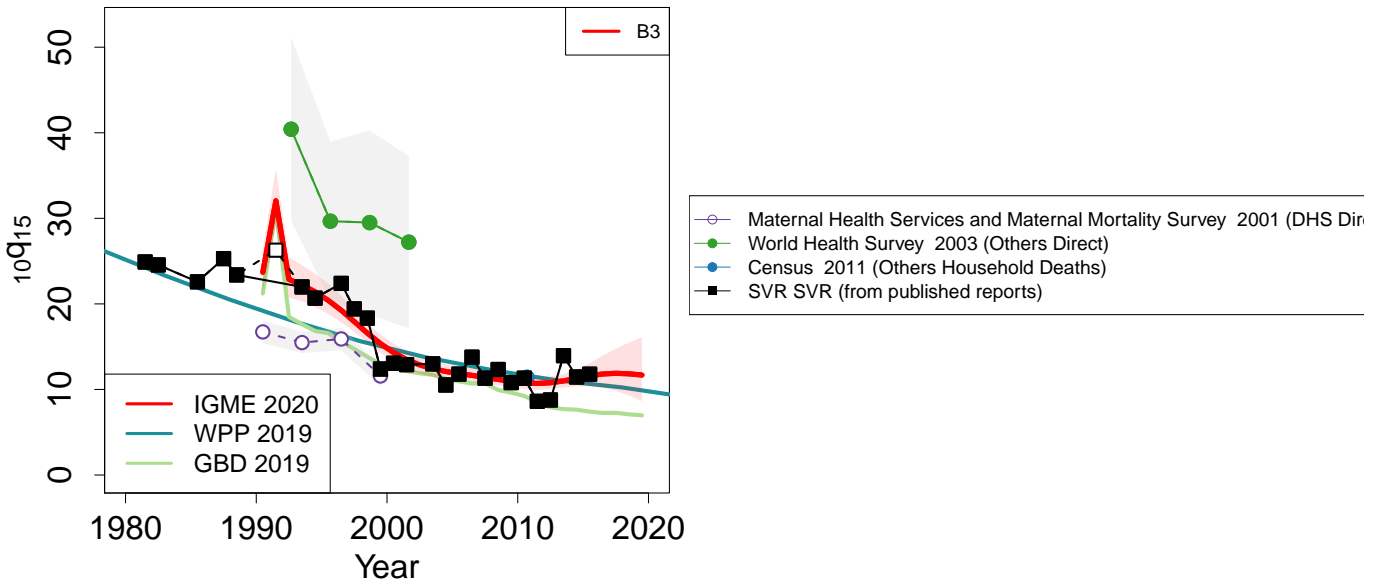

## Barbados

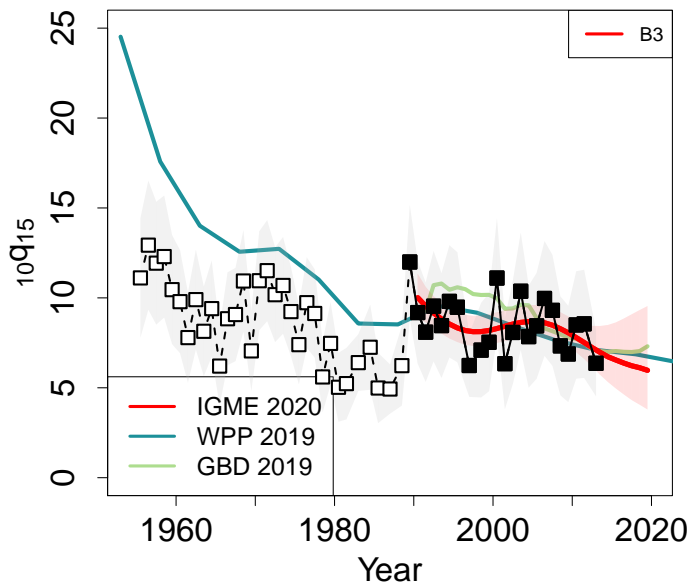

## Belarus

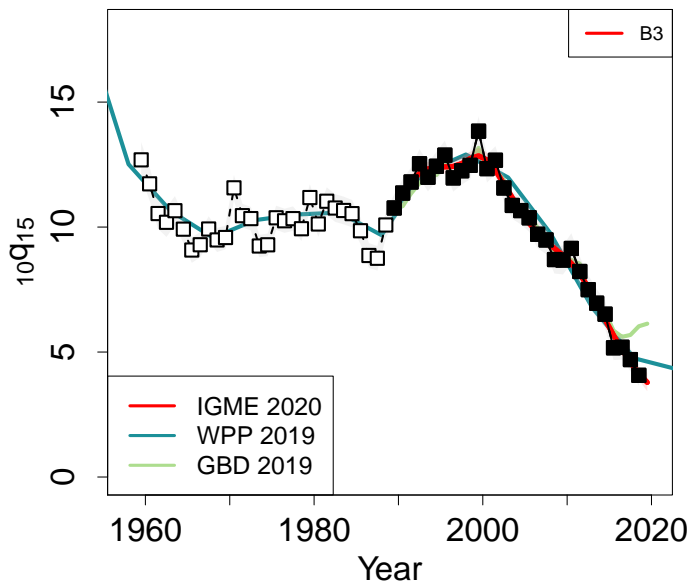

## Belgium

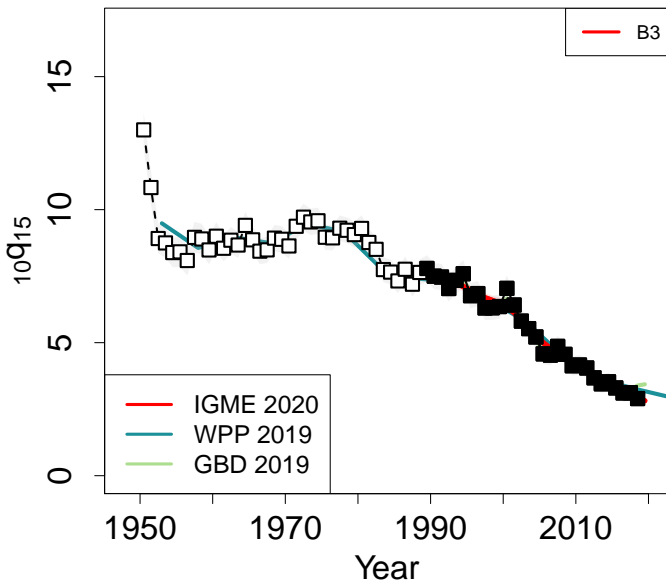

## Belize

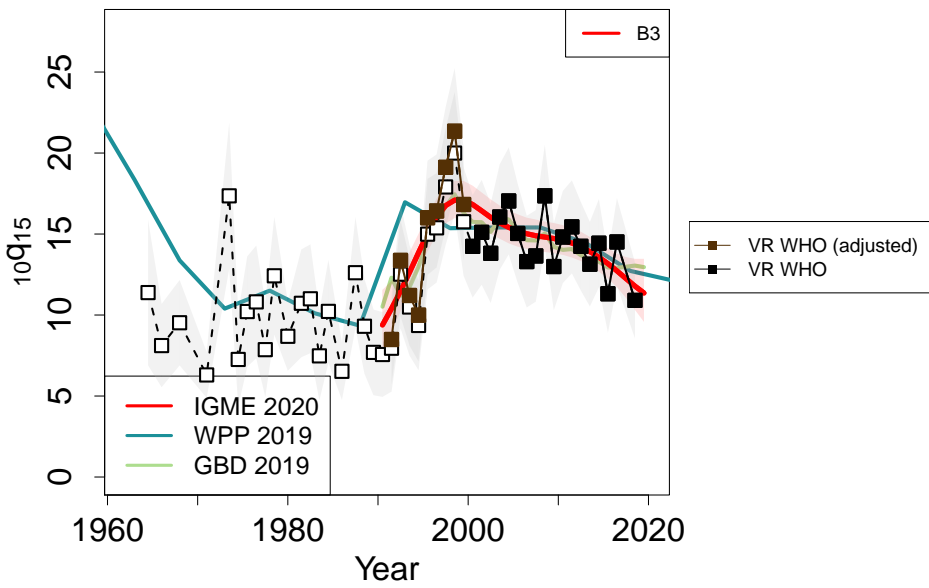



### Benin

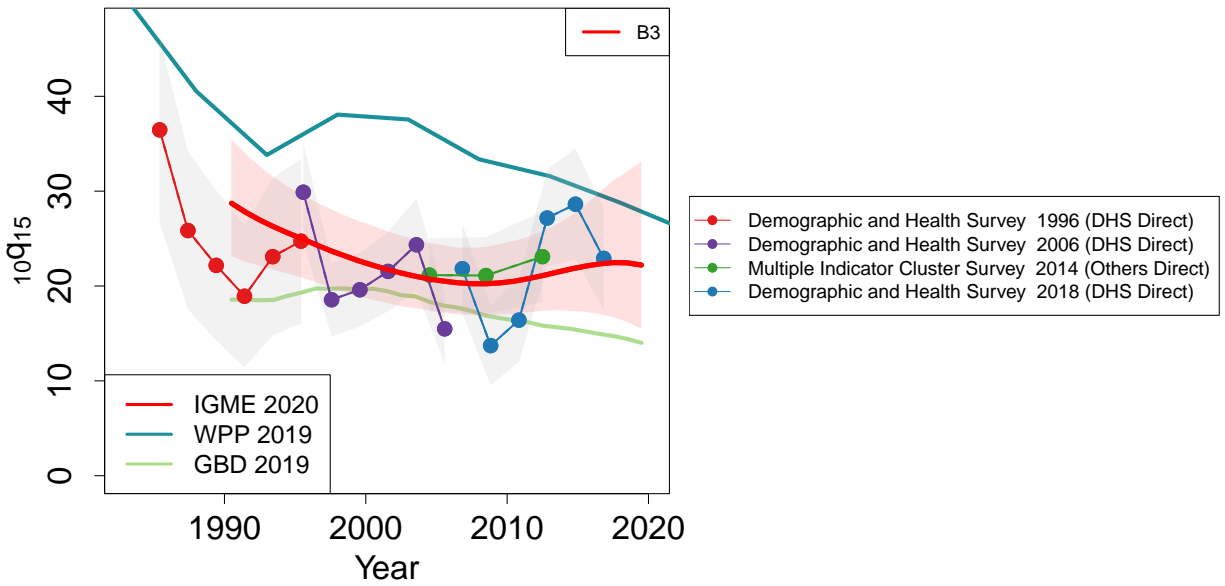

### Bhutan

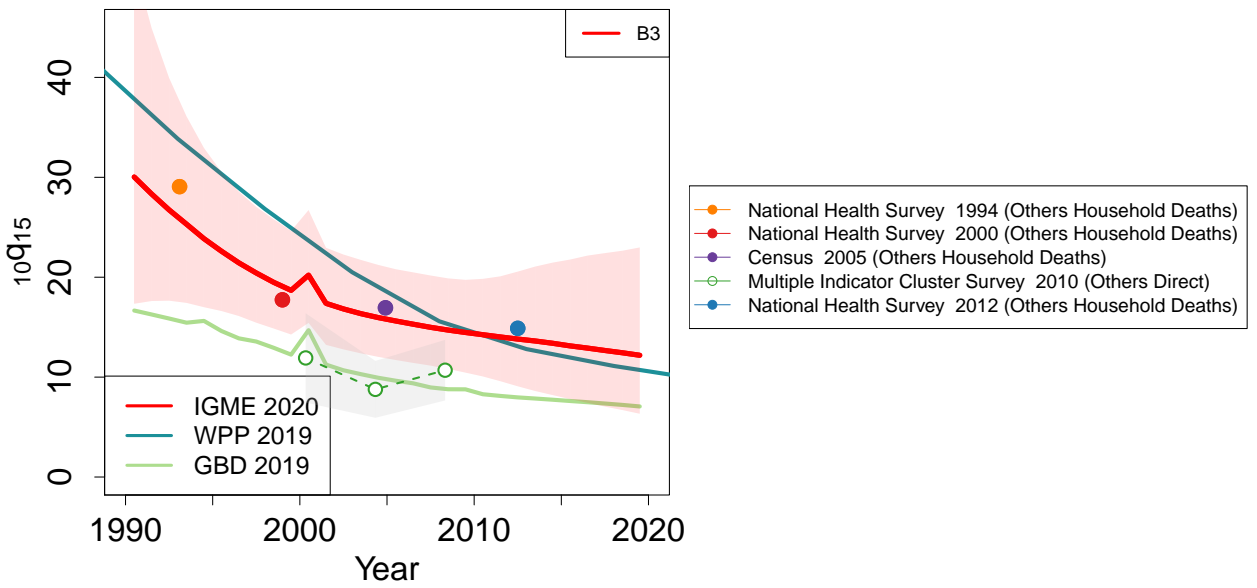

## Bolivia

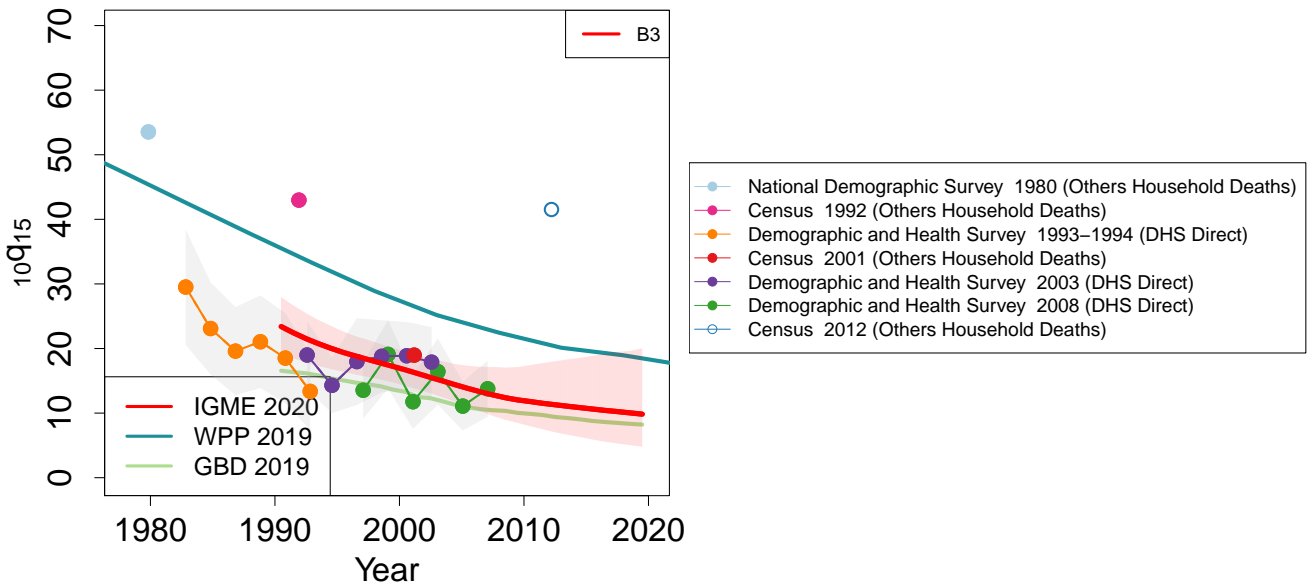

## Bosnia & Herzegovina

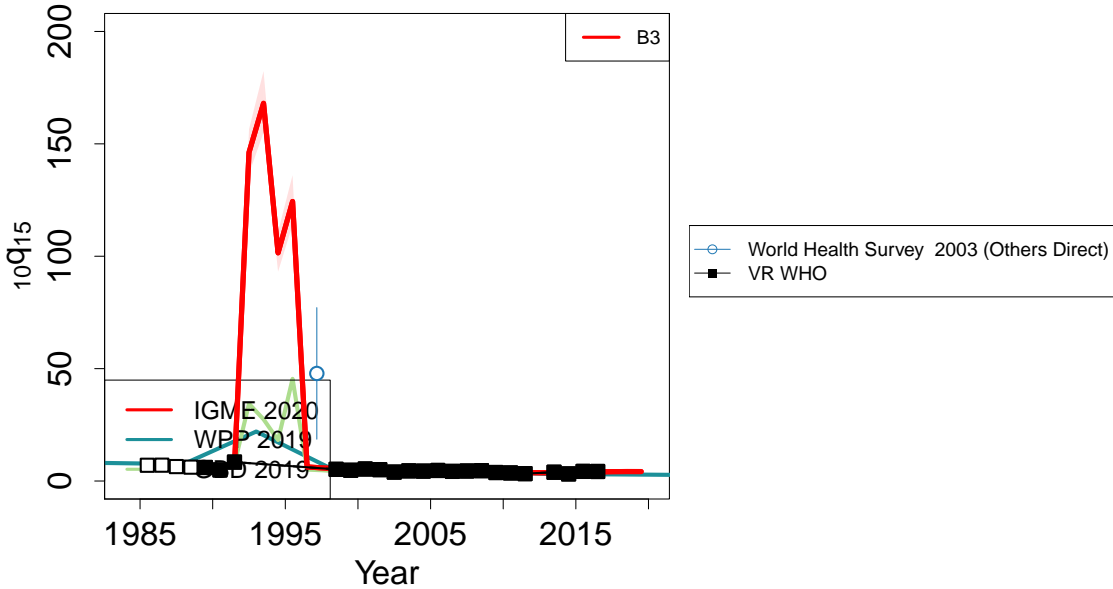

## Botswana

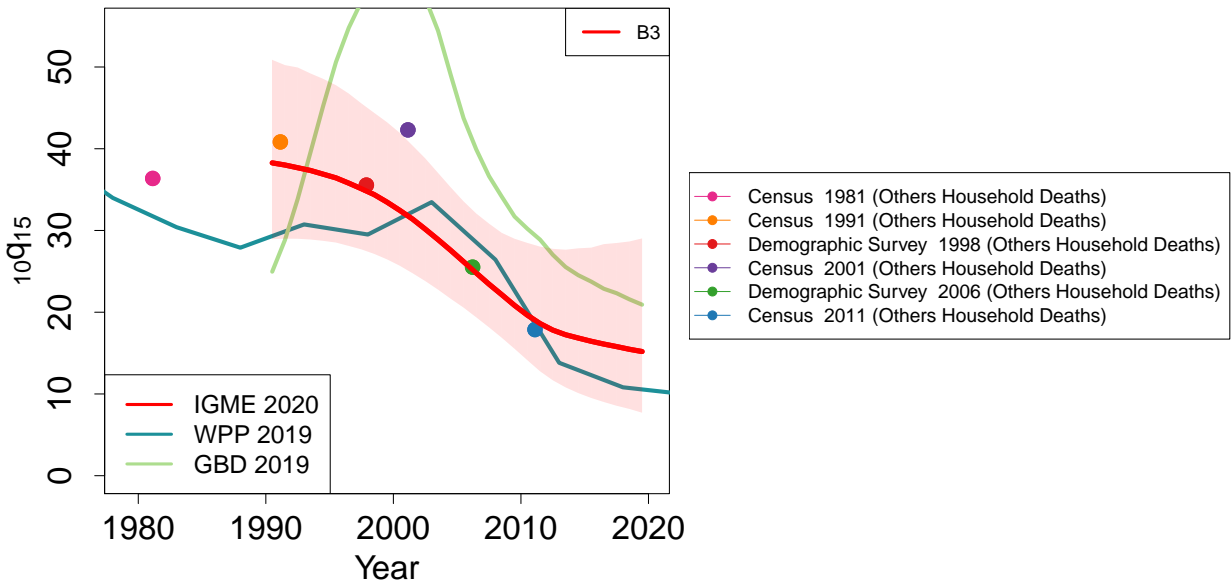

## Brazil

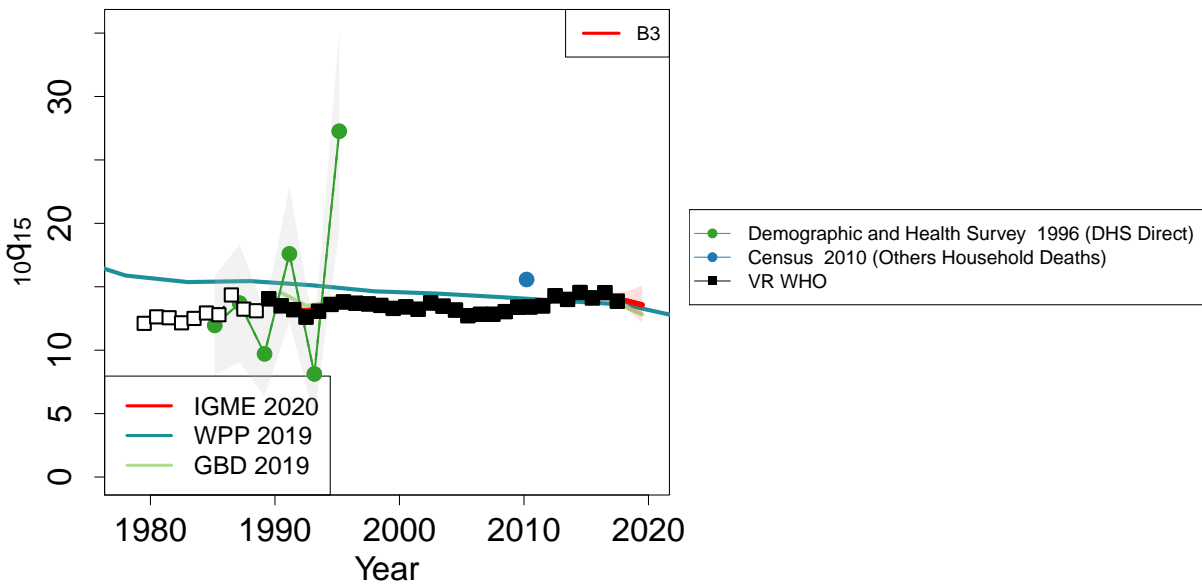

## Brunei

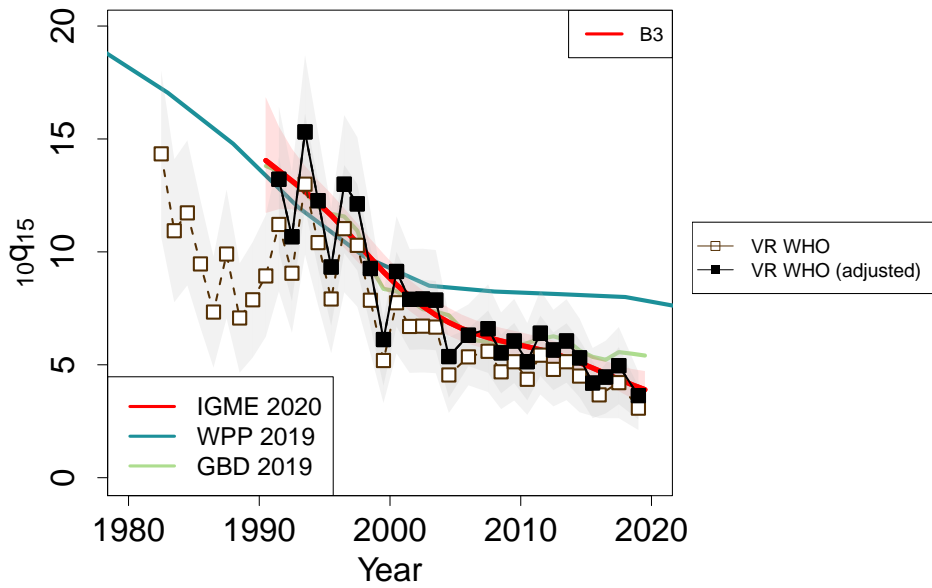

## Bulgaria

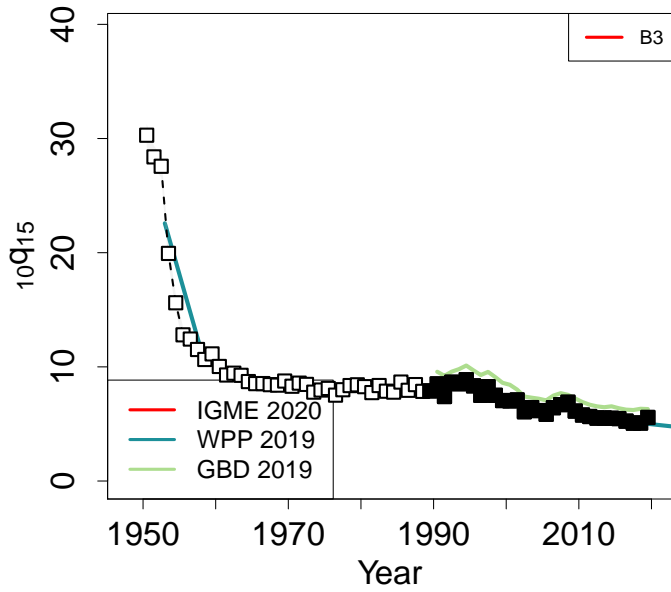

## Burkina Faso

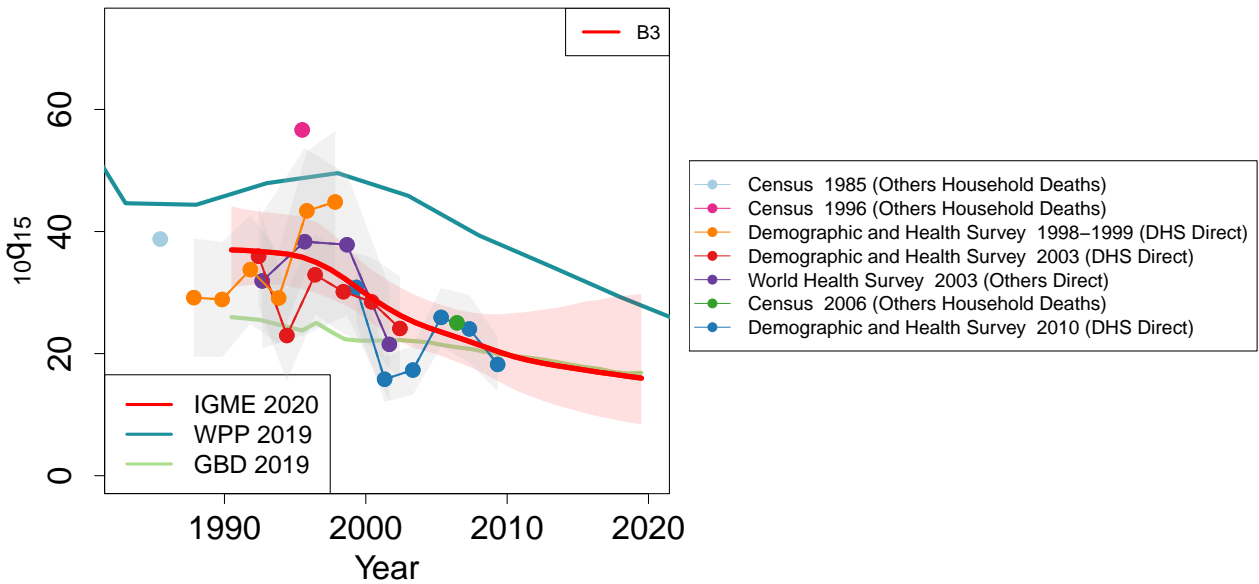

## Burundi

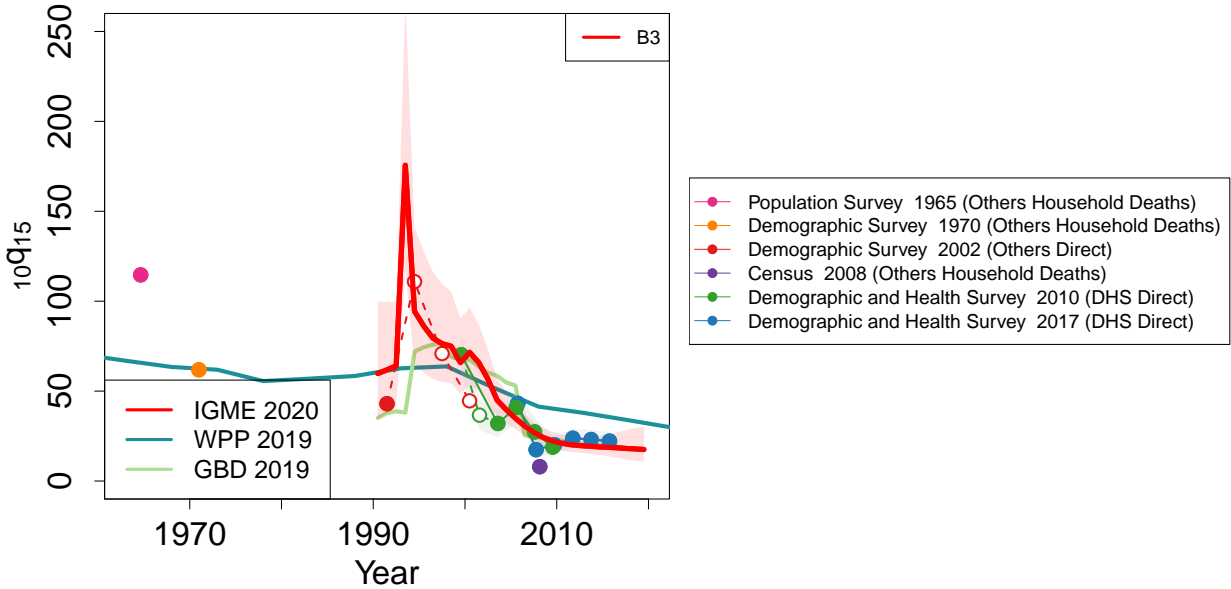

## Cambodia

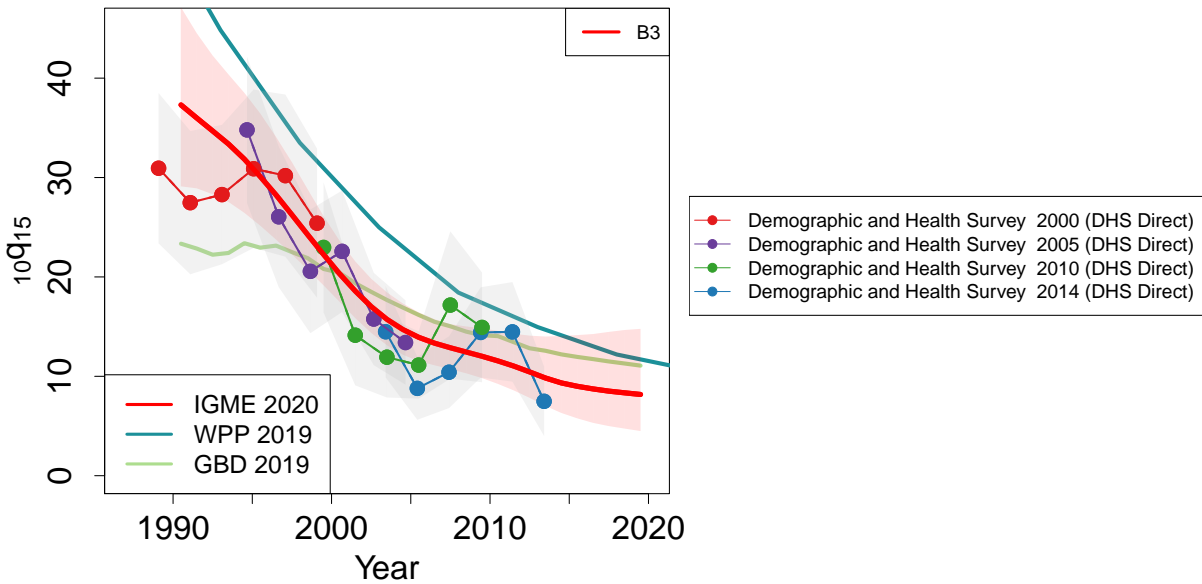

## Cameroon

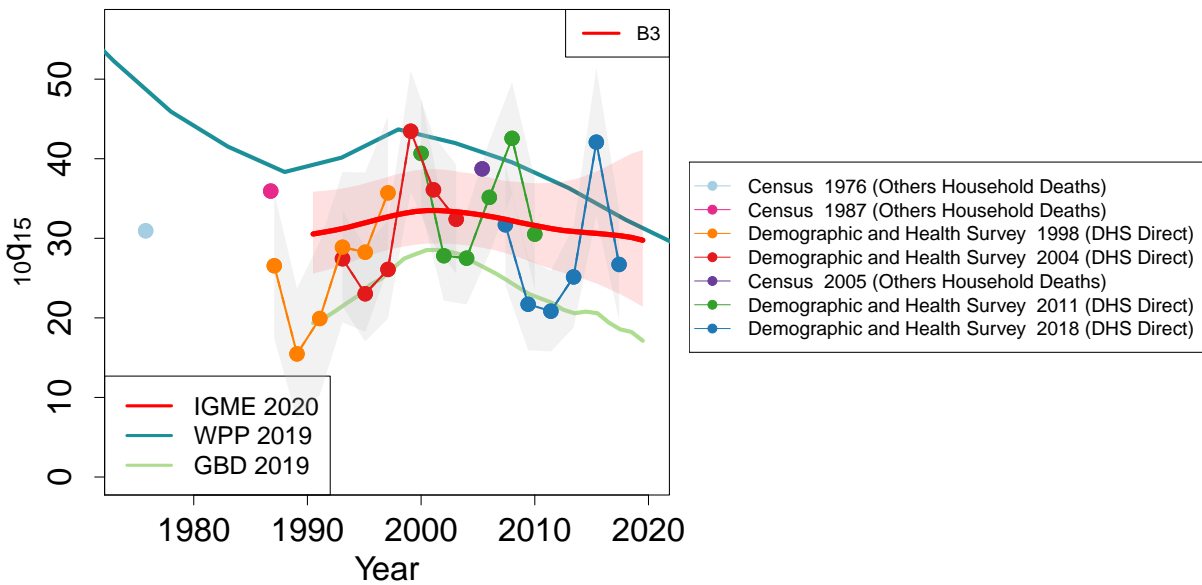

### Canada

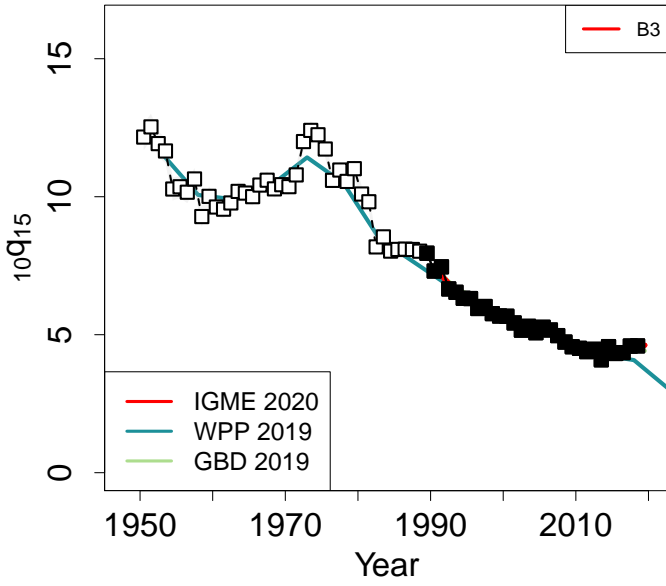

### Cape Verde

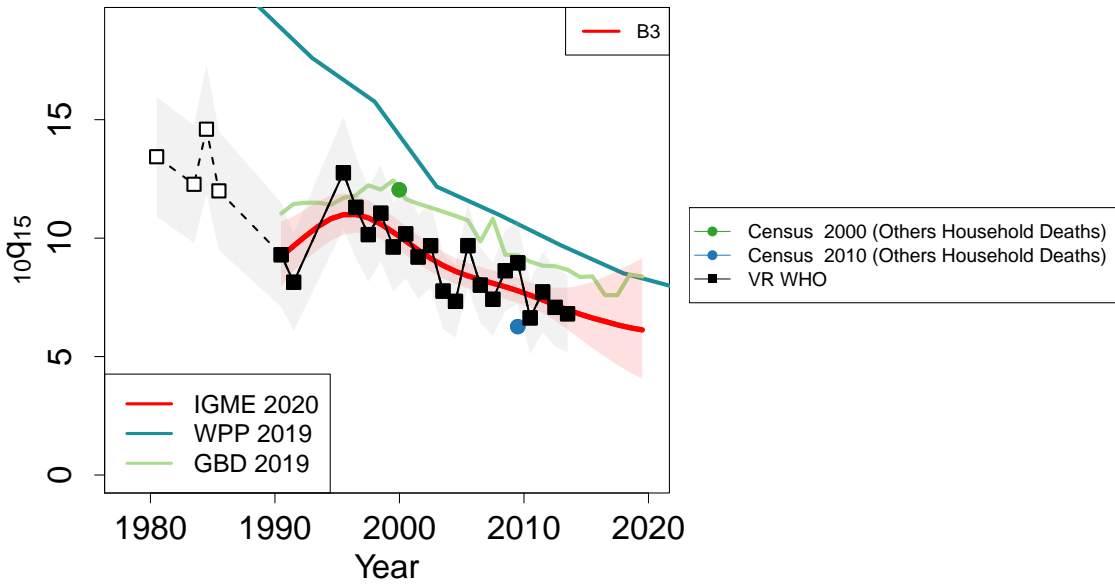

## Central African Republic

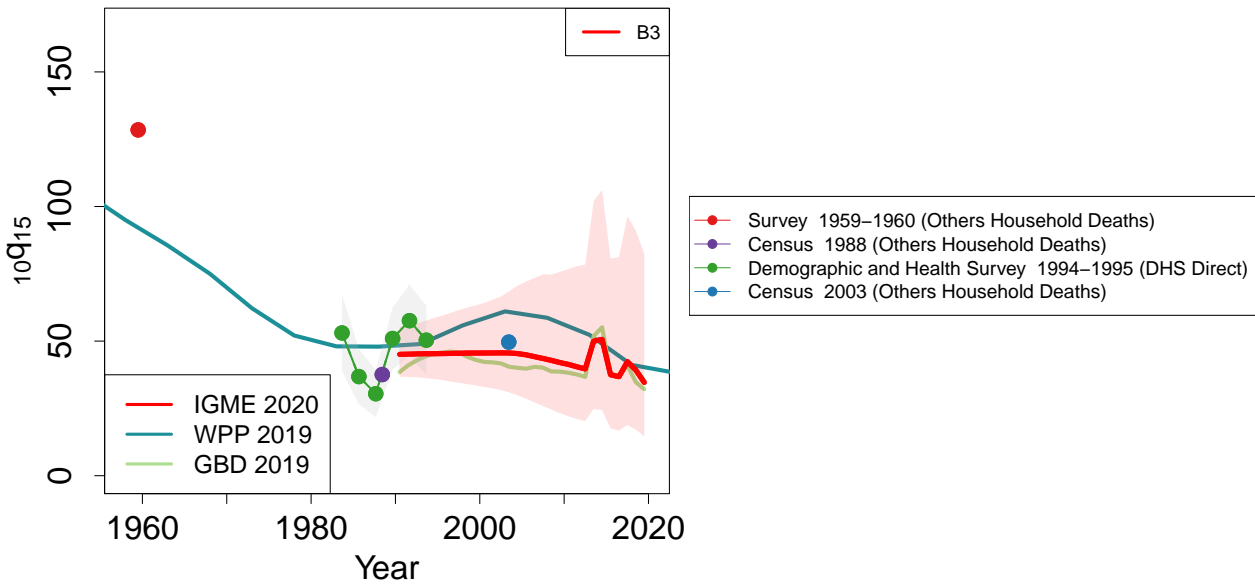

## Chad

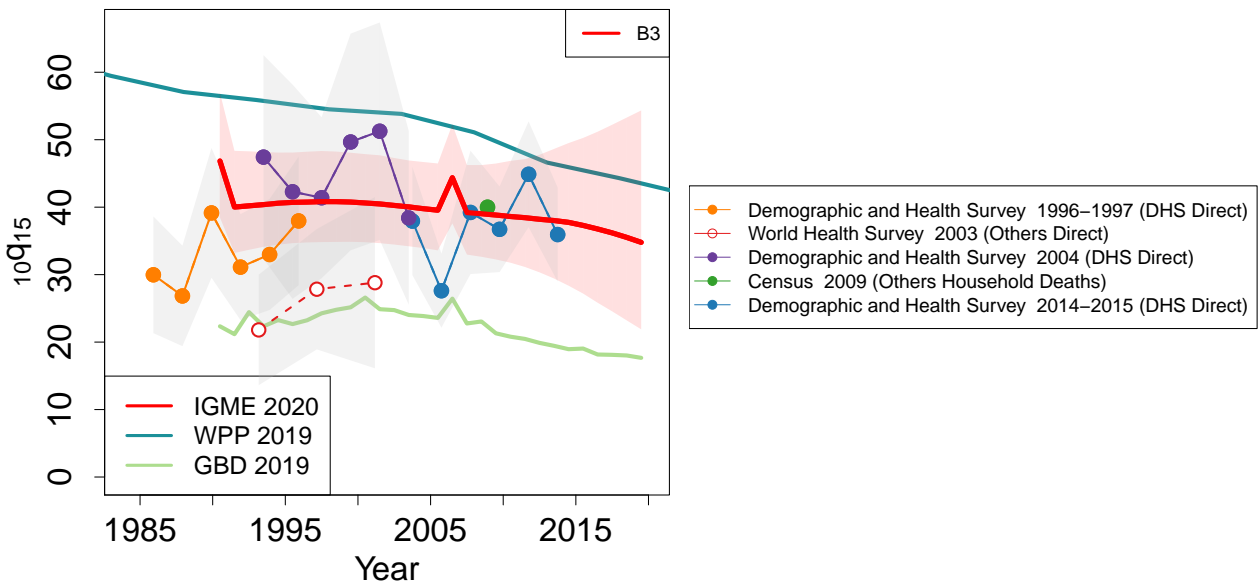



## Chile

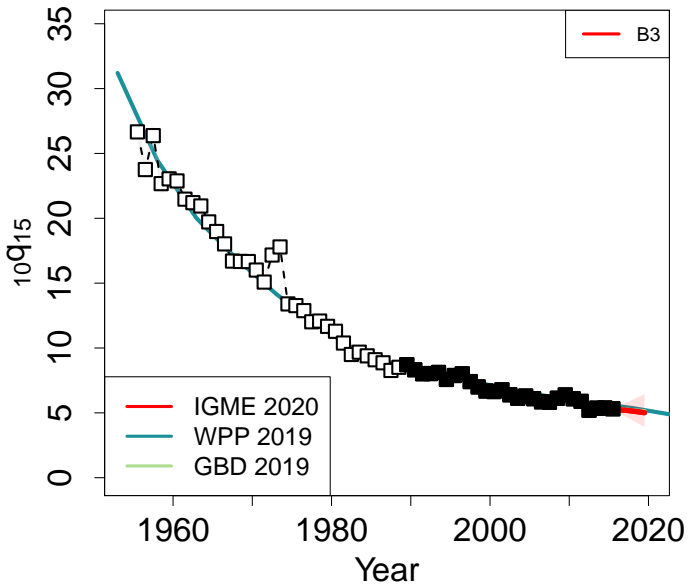

## China

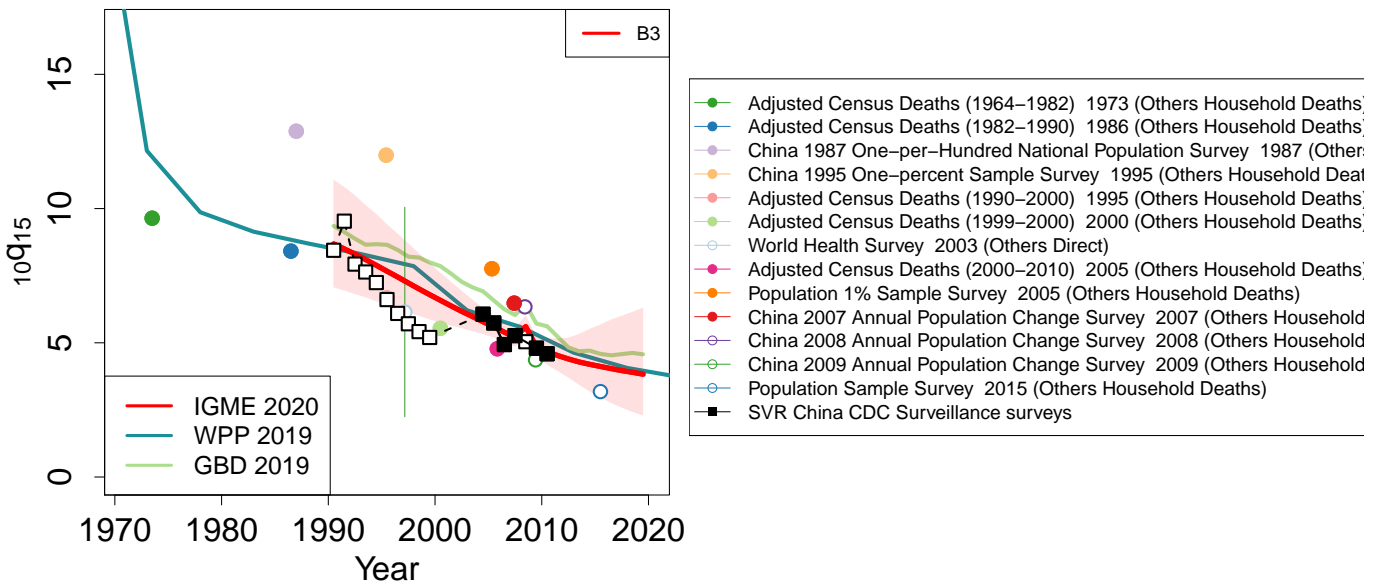

## Colombia

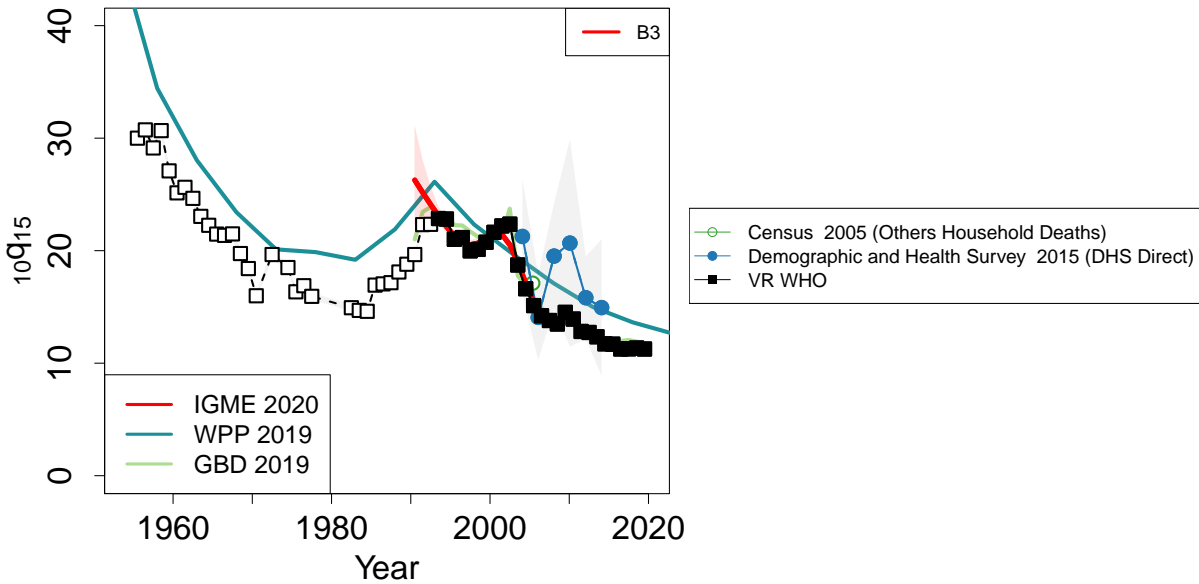

## Comoros

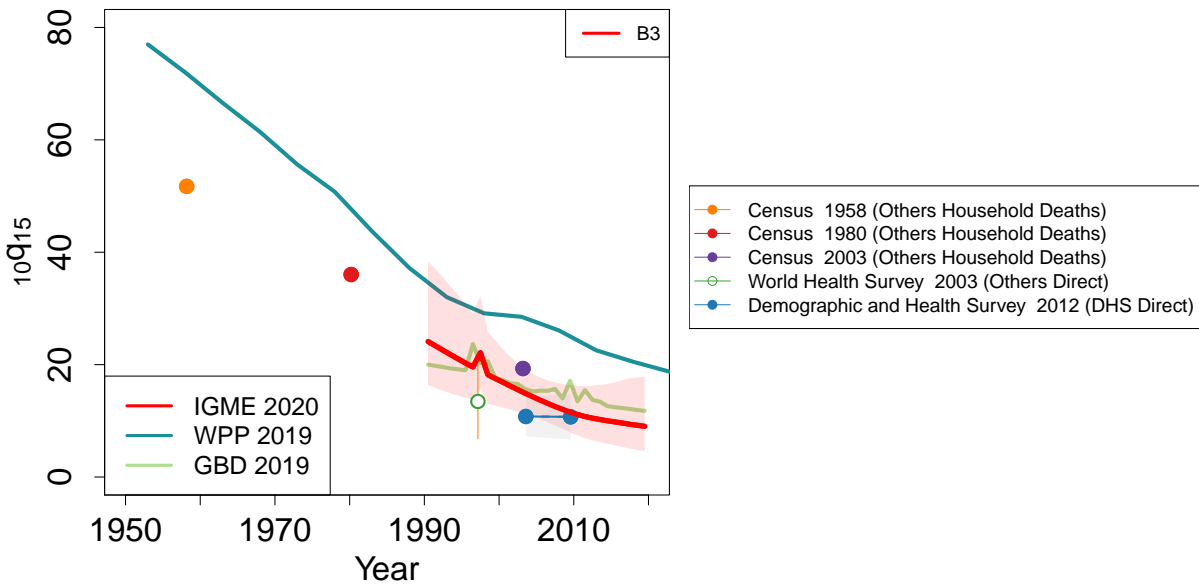

## Congo

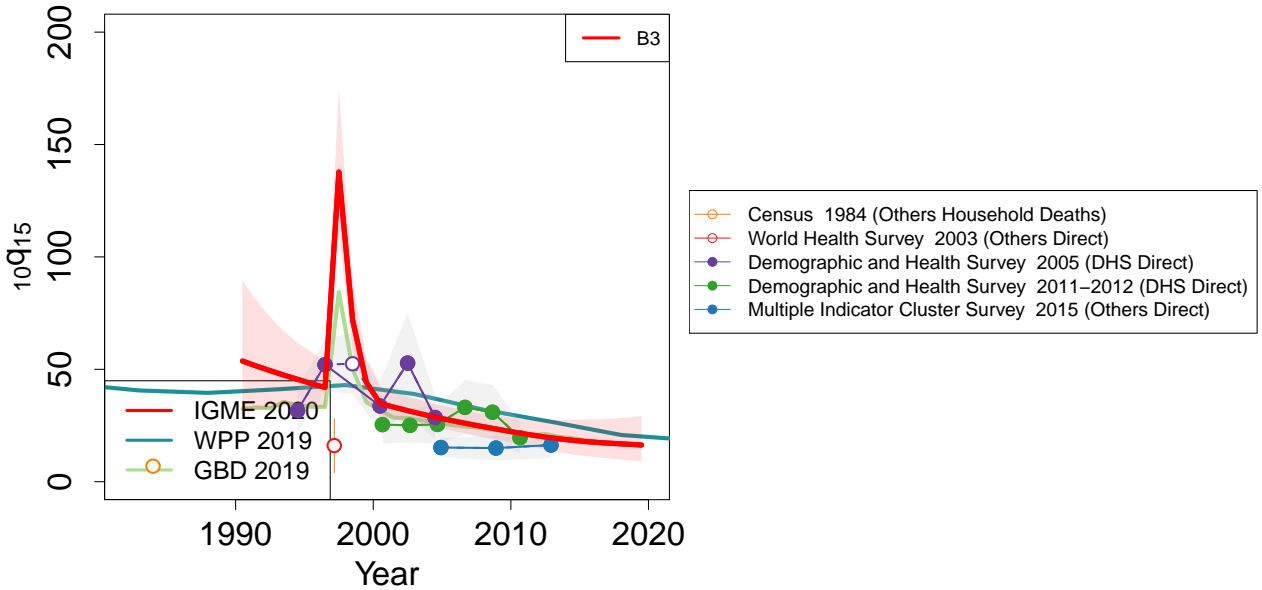

## Congo DR

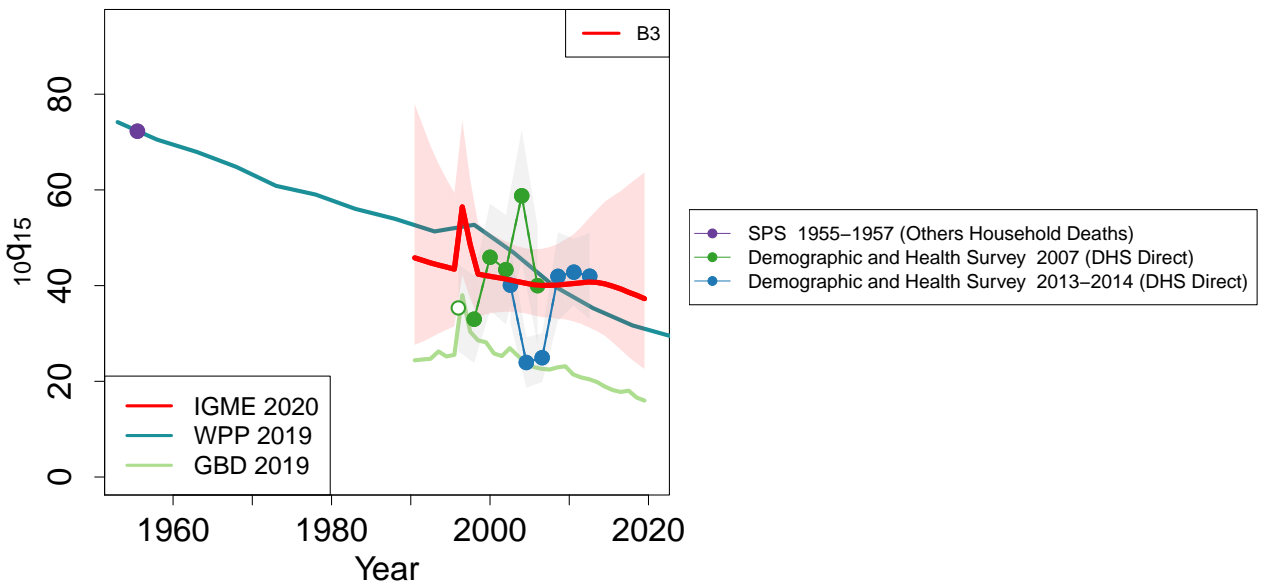

## Cook Islands

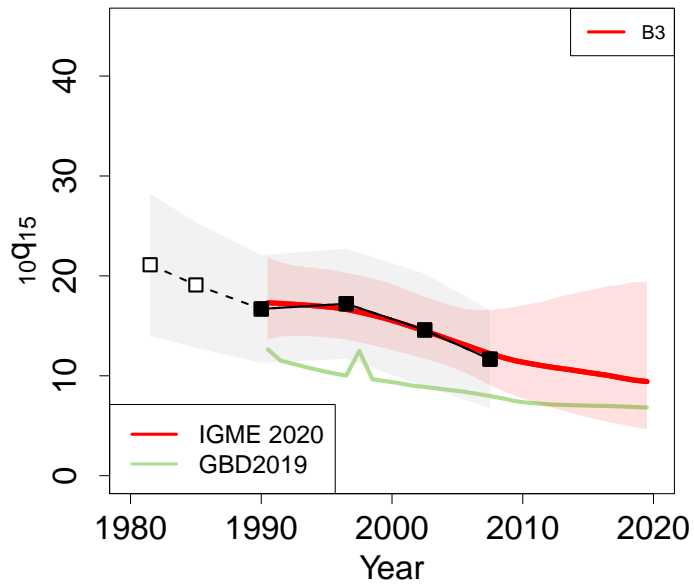

## Costa Rica

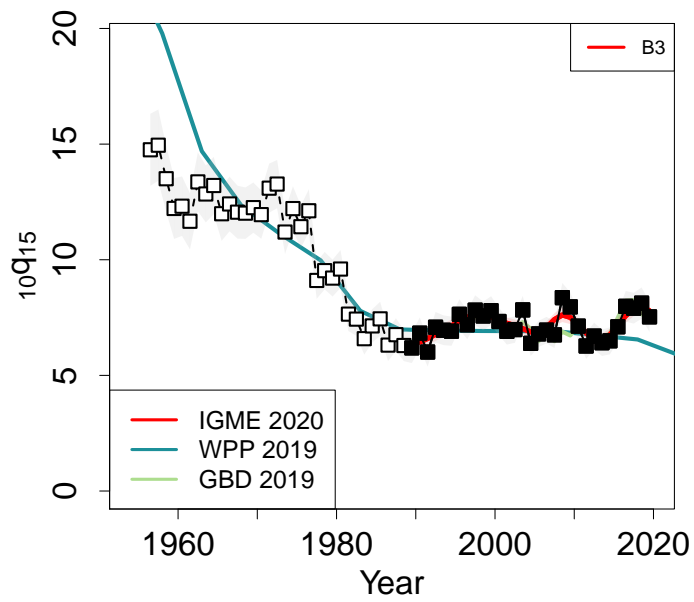

### Cote d Ivoire

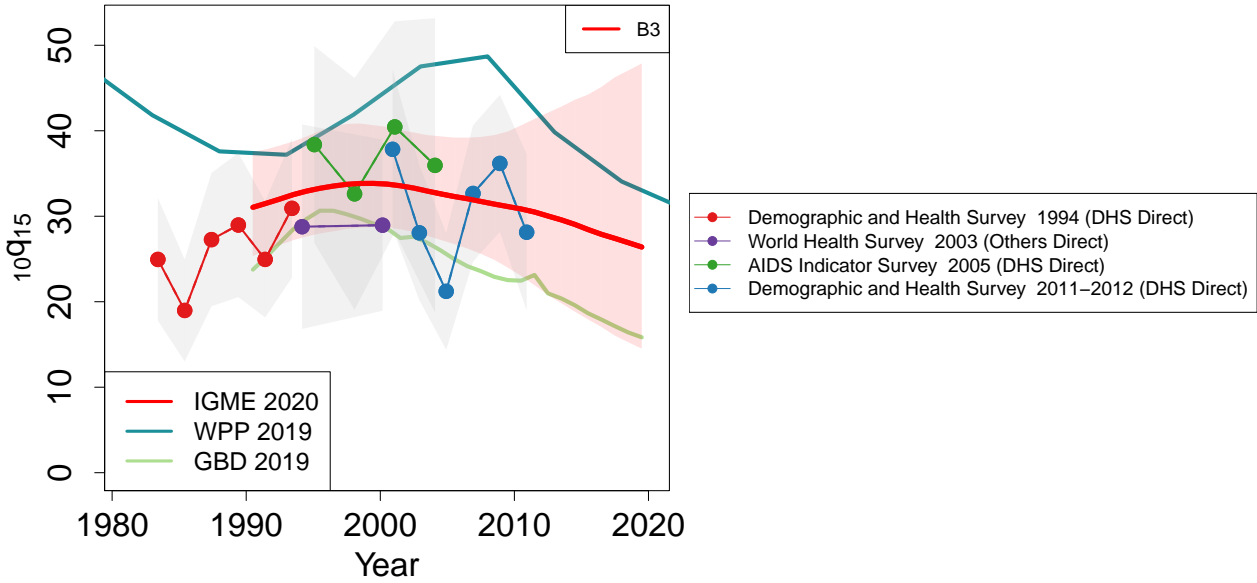

### Croatia

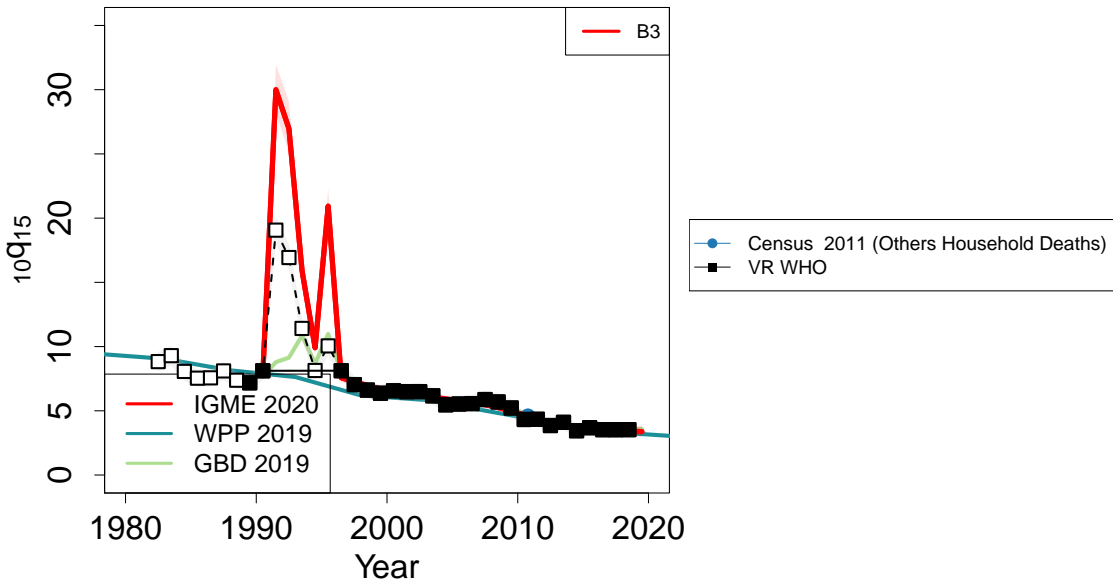

## Cuba

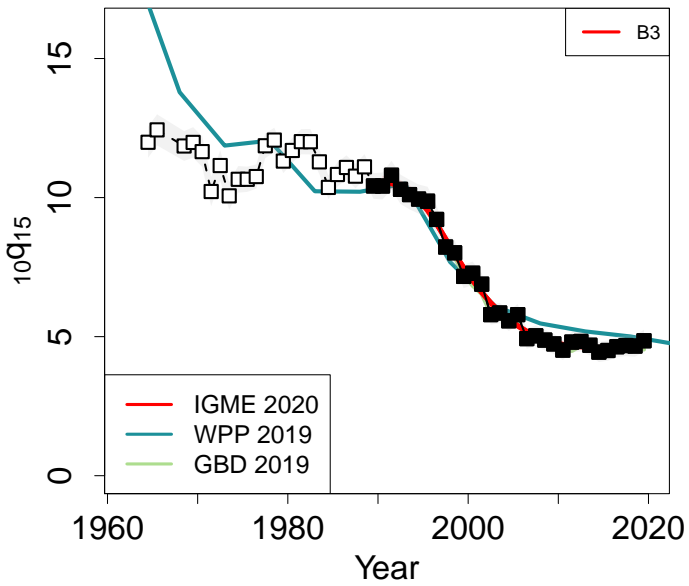

## Cyprus

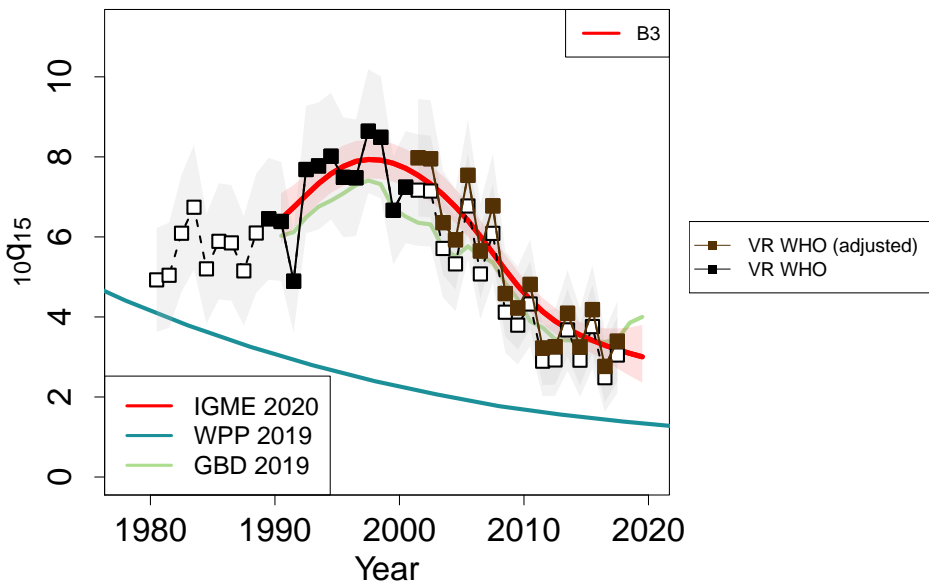

## Czech Republic

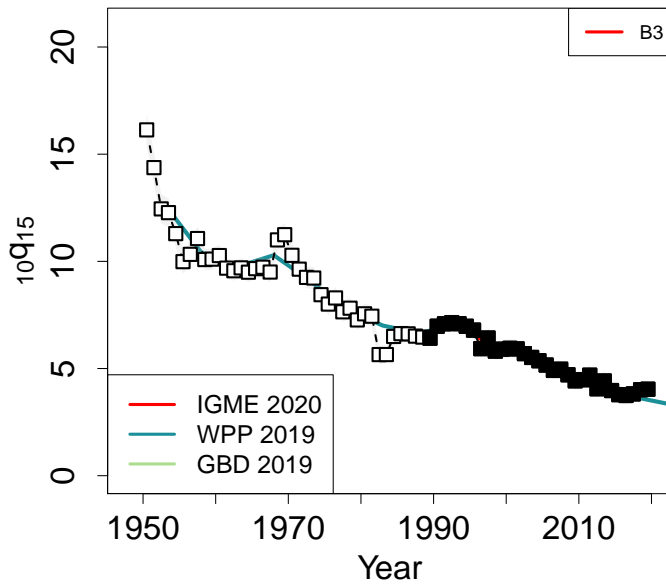

## Denmark

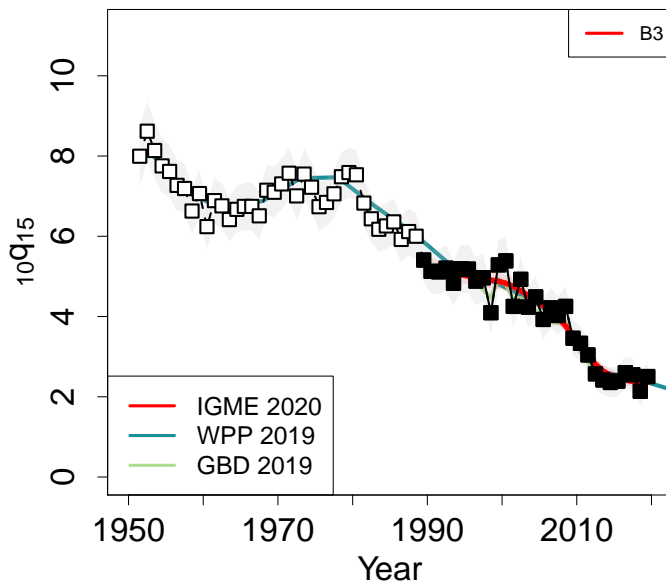

## Djibouti

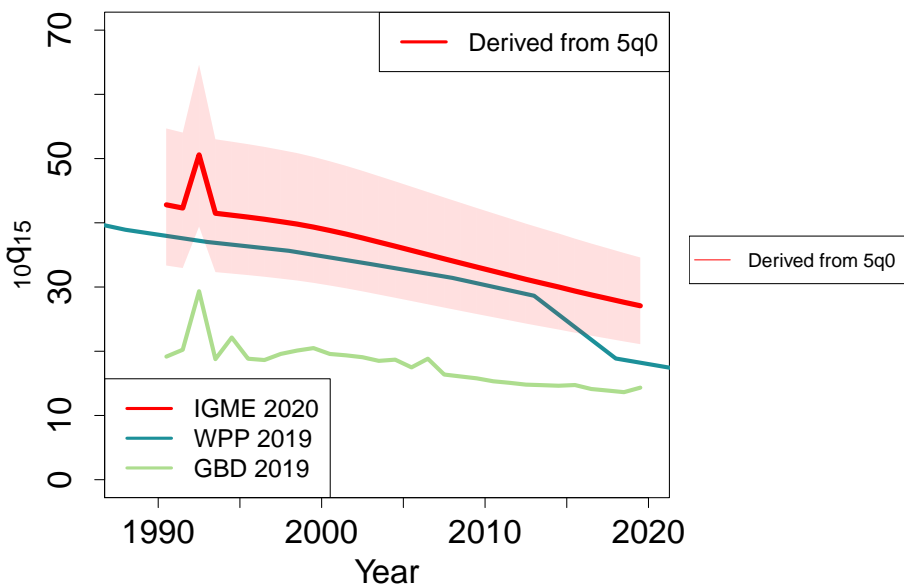

## Dominica

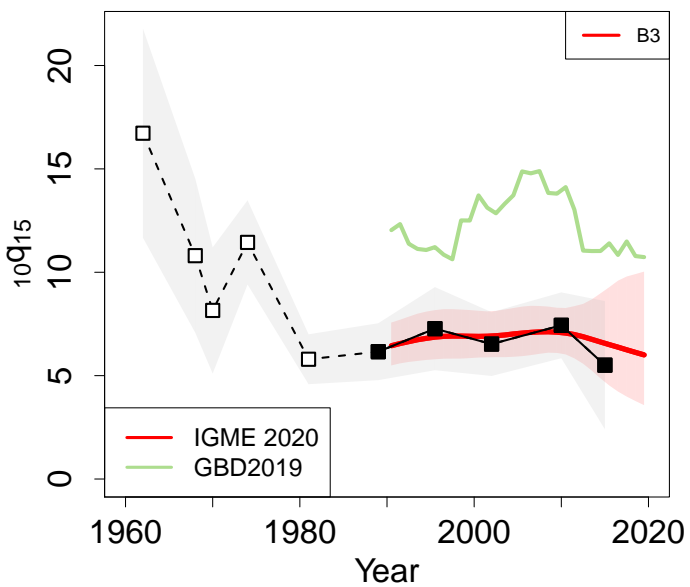



## Dominican Republic

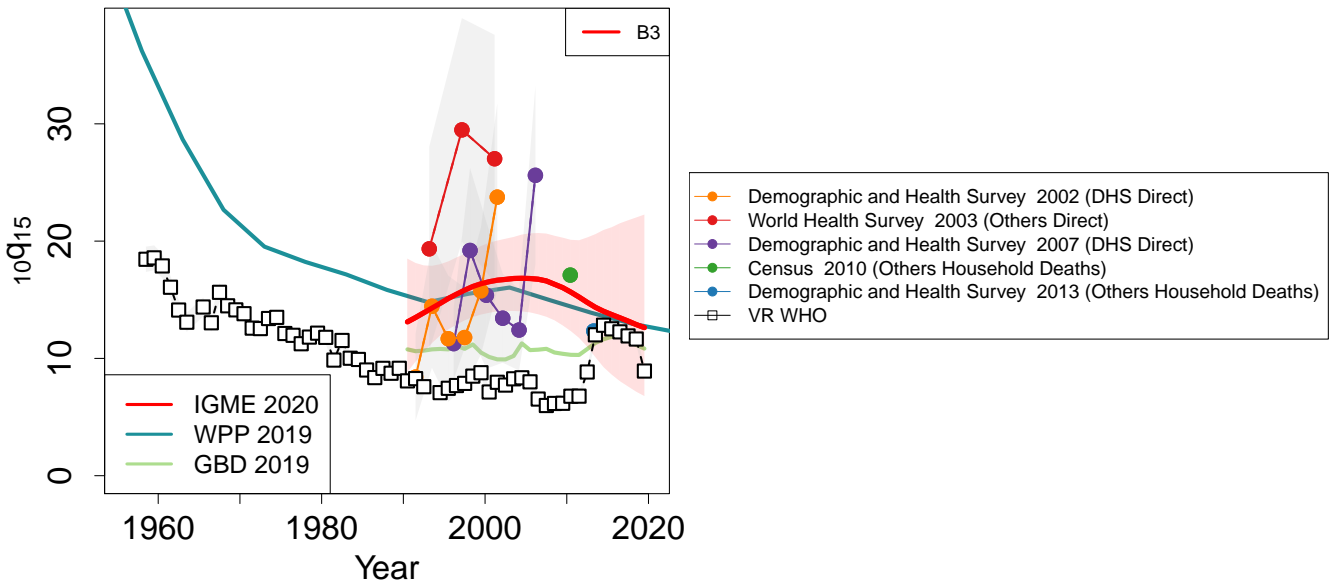

## Ecuador

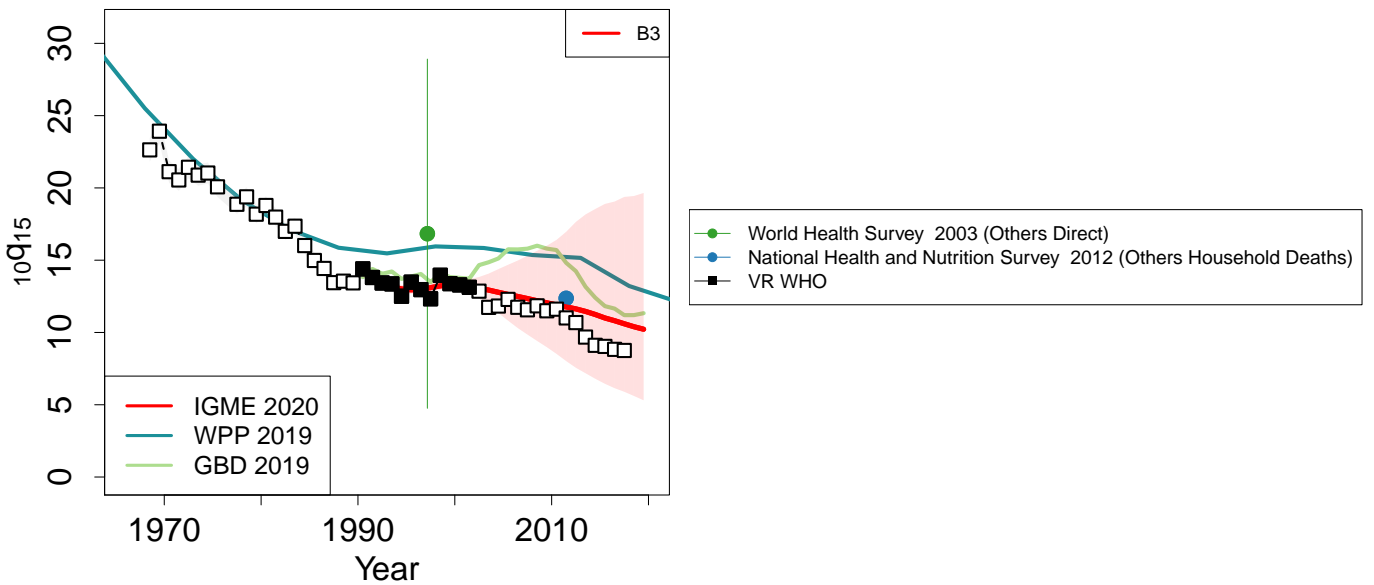

## Egypt

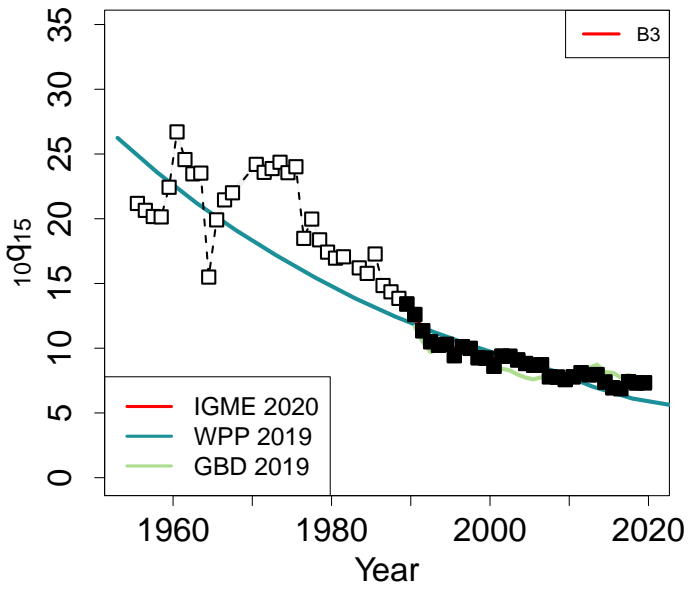

## El Salvador

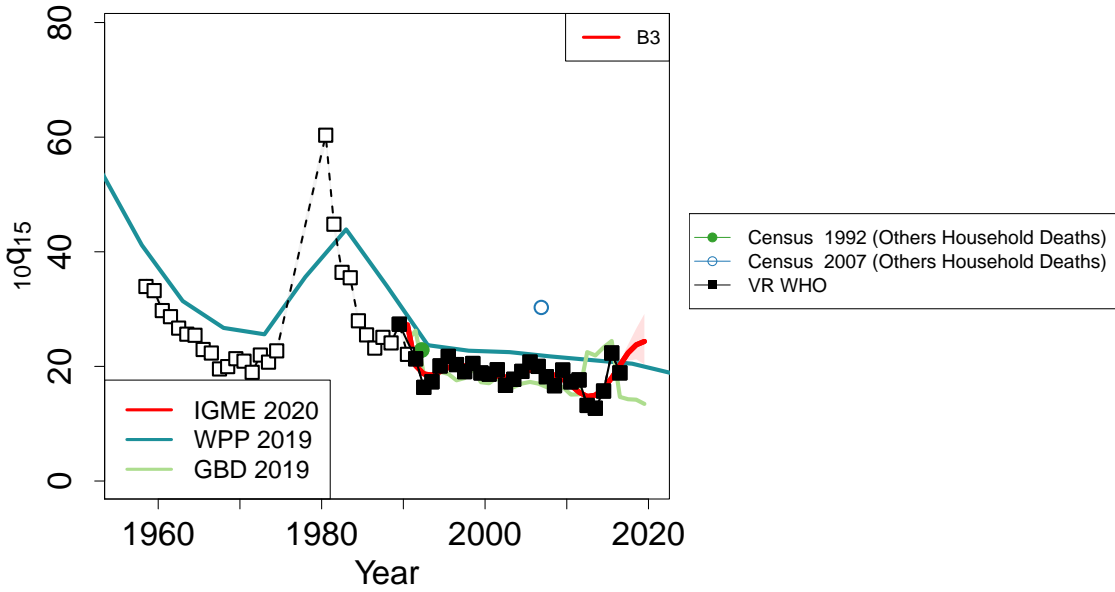

## Equatorial Guinea

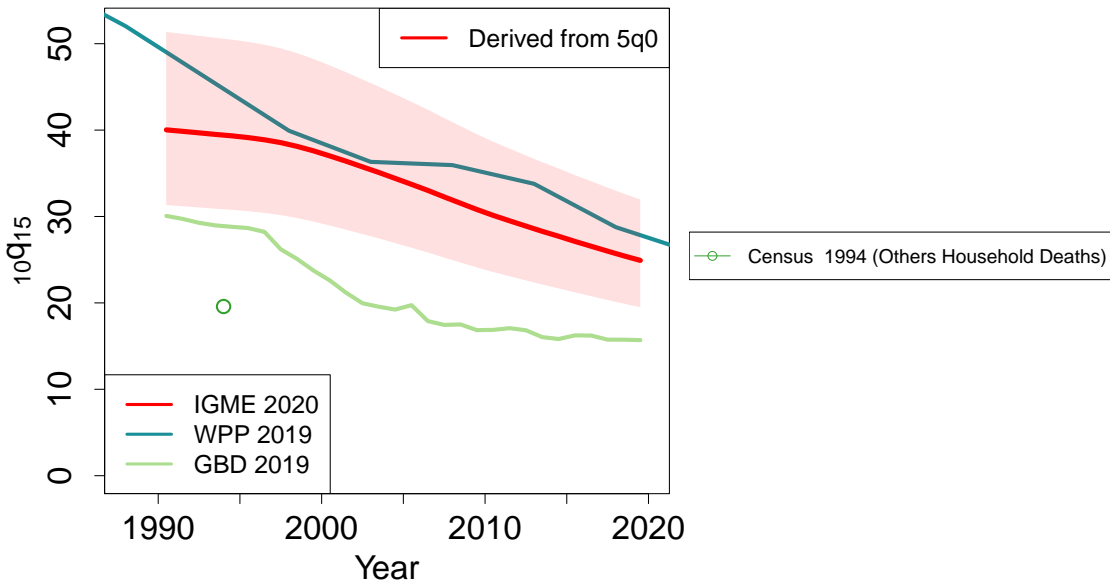

## Eritrea

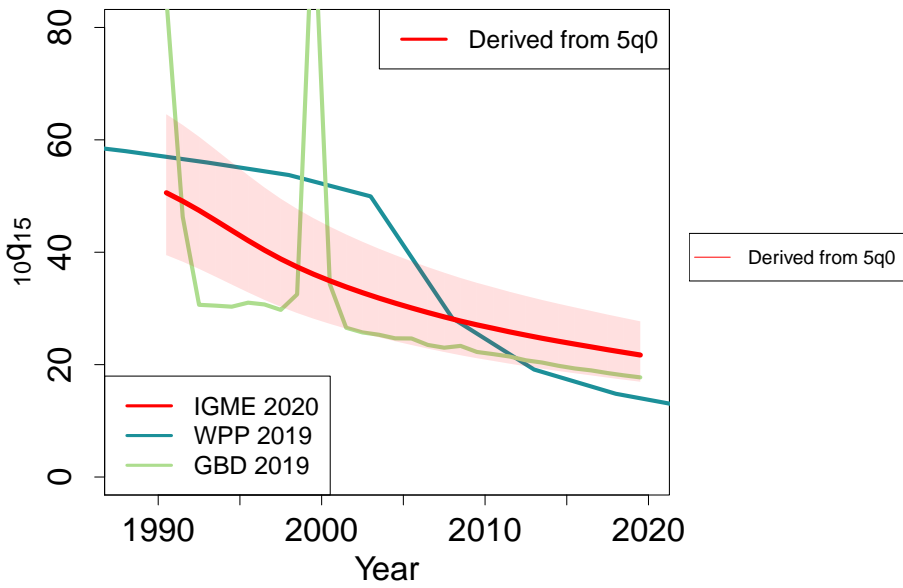

### Estonia

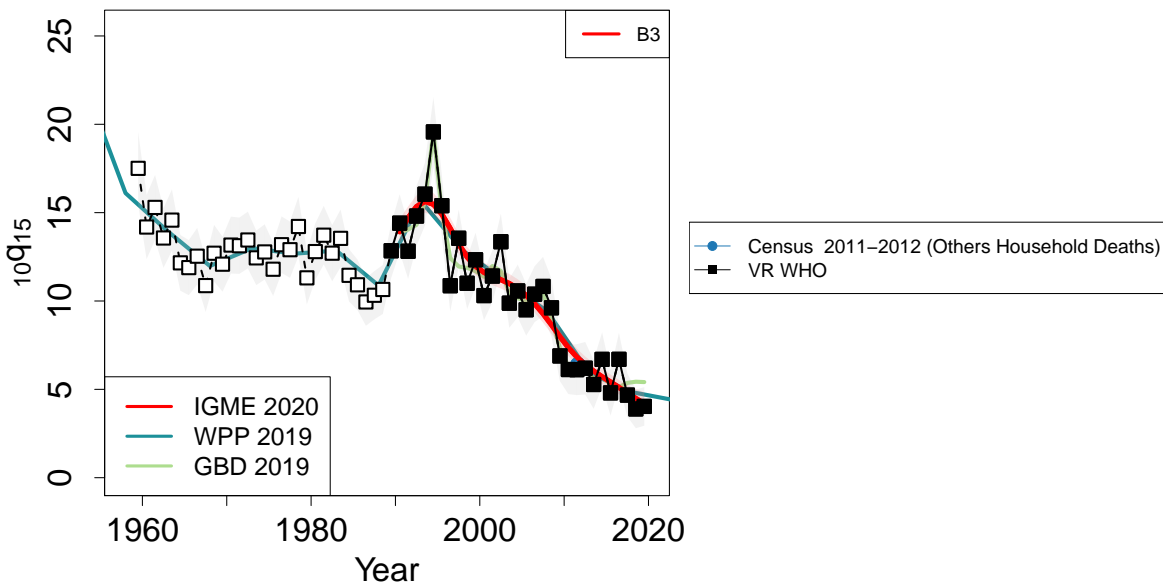

### Eswatini

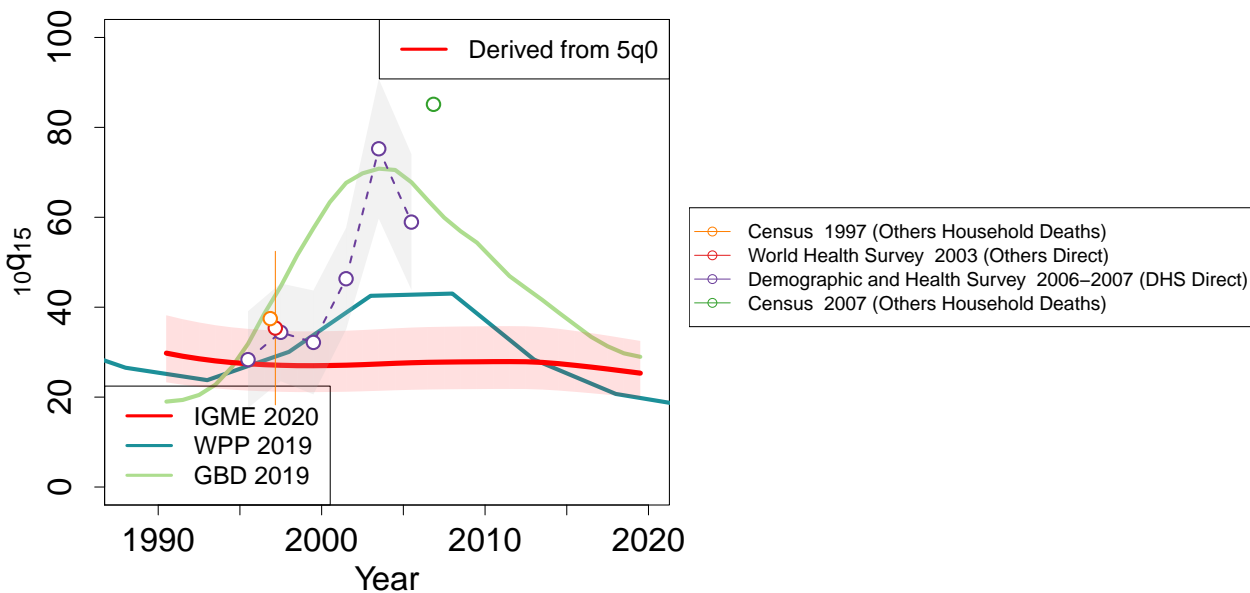

## Ethiopia

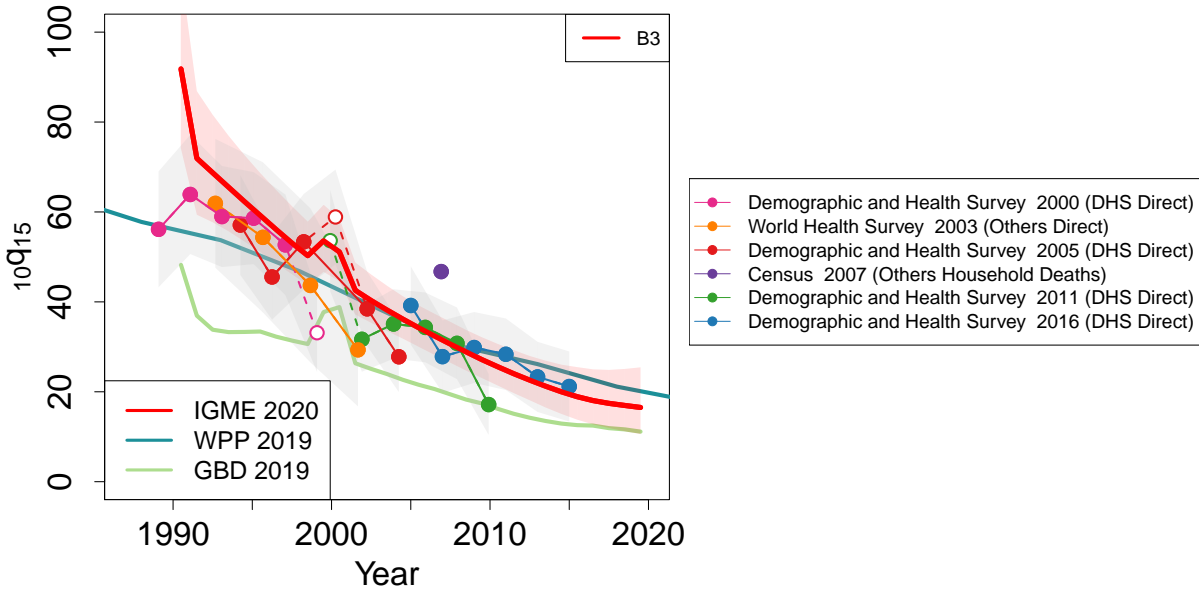

## Federated States of Micronesia

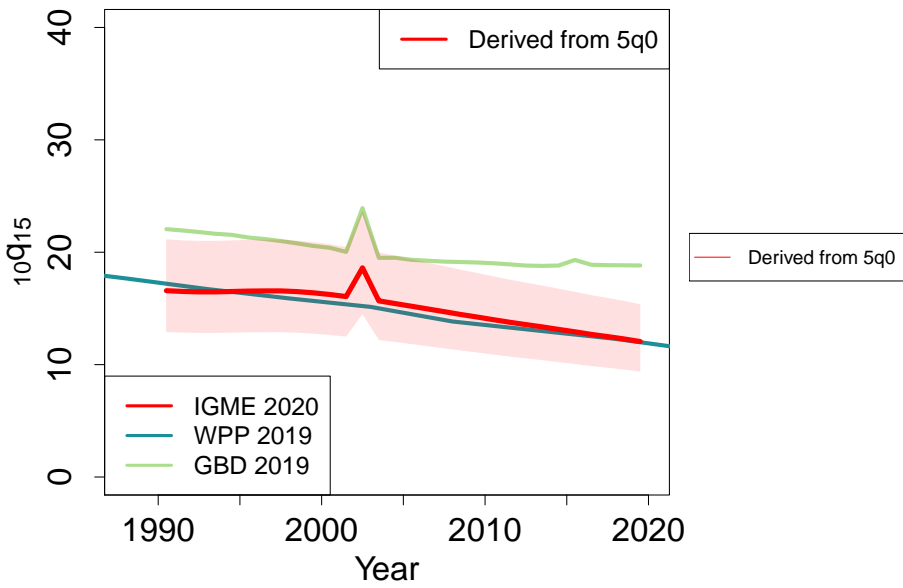

## Fiji

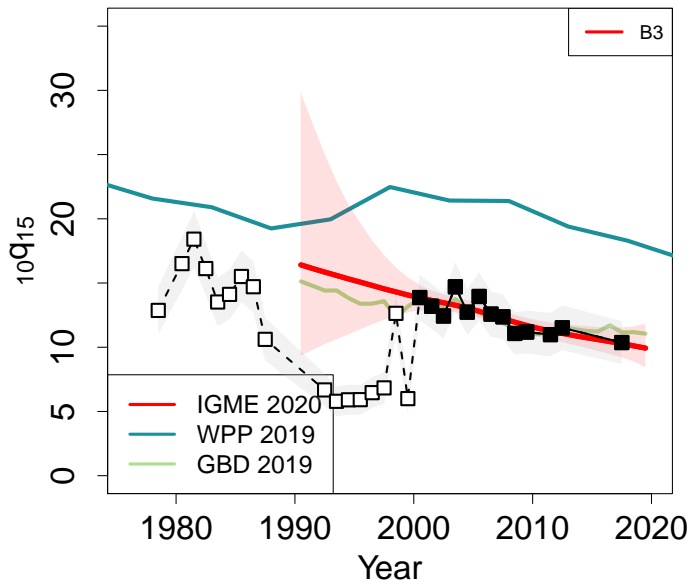

## Finland

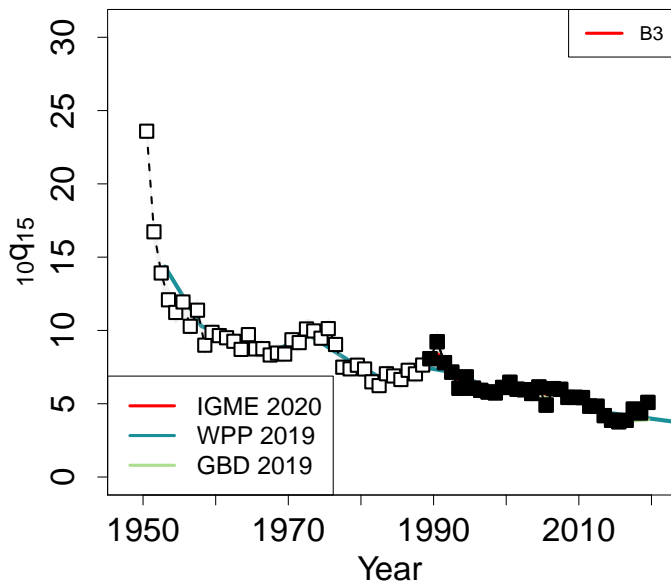

### France

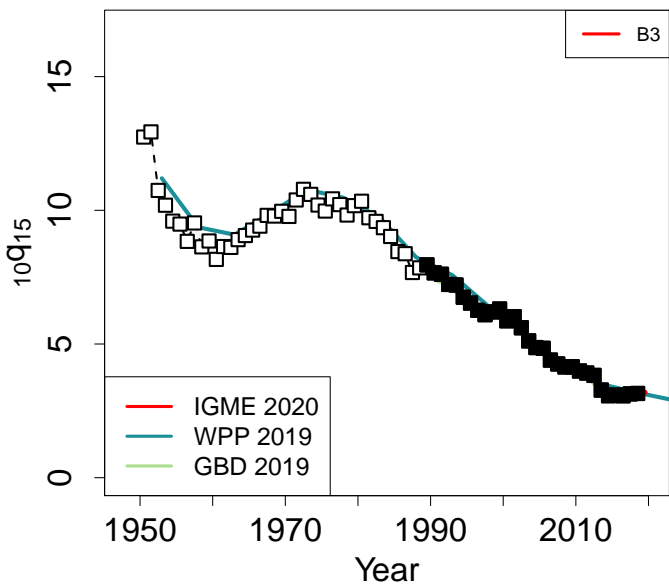

### Gabon

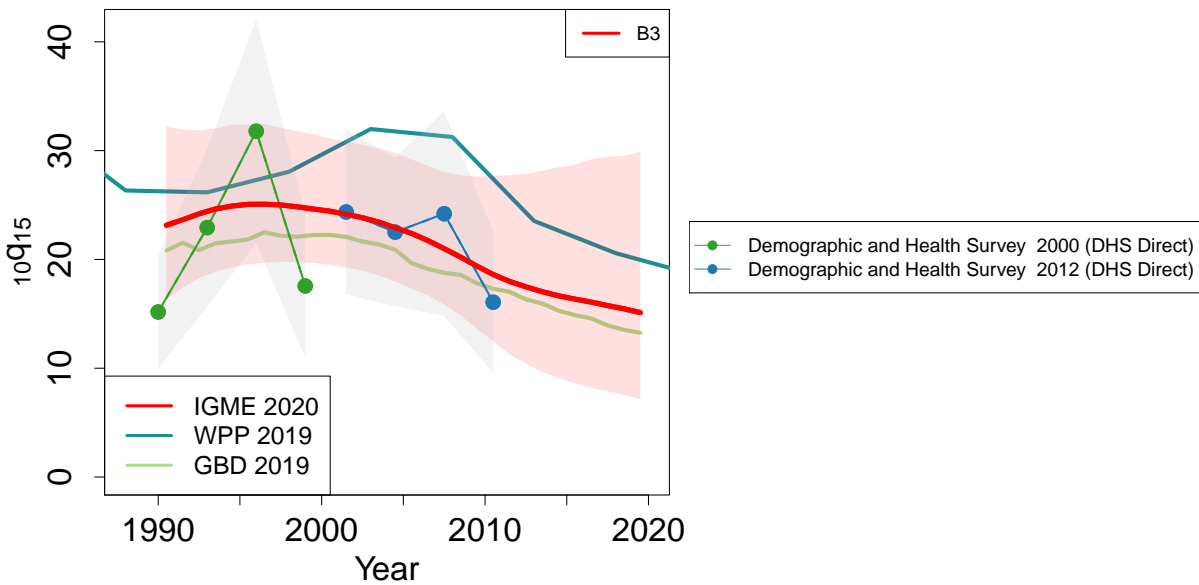

### Gambia The

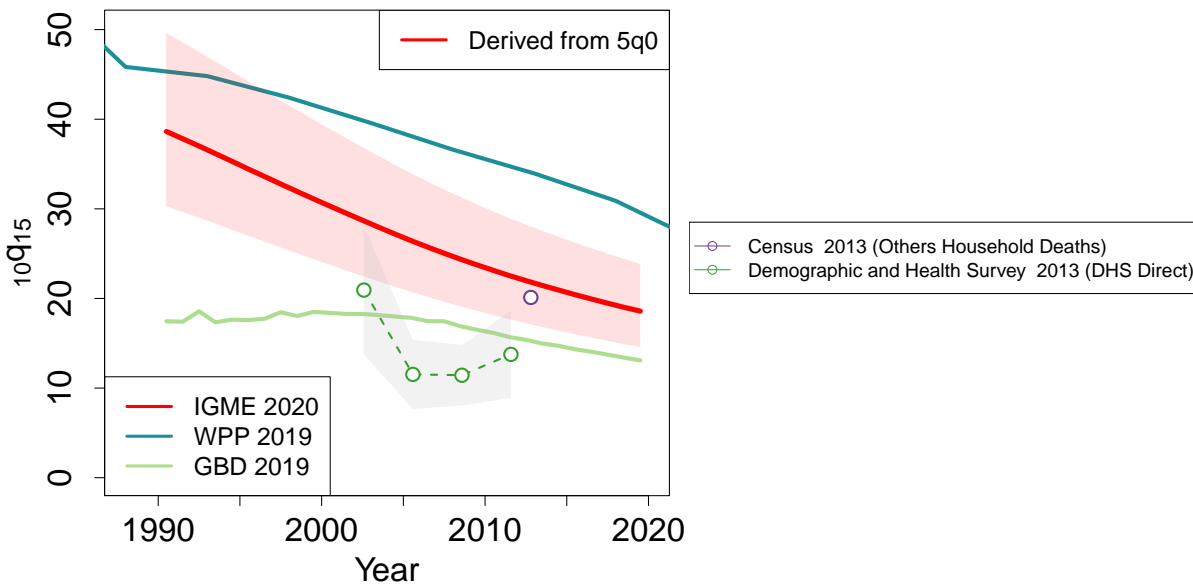

### Georgia

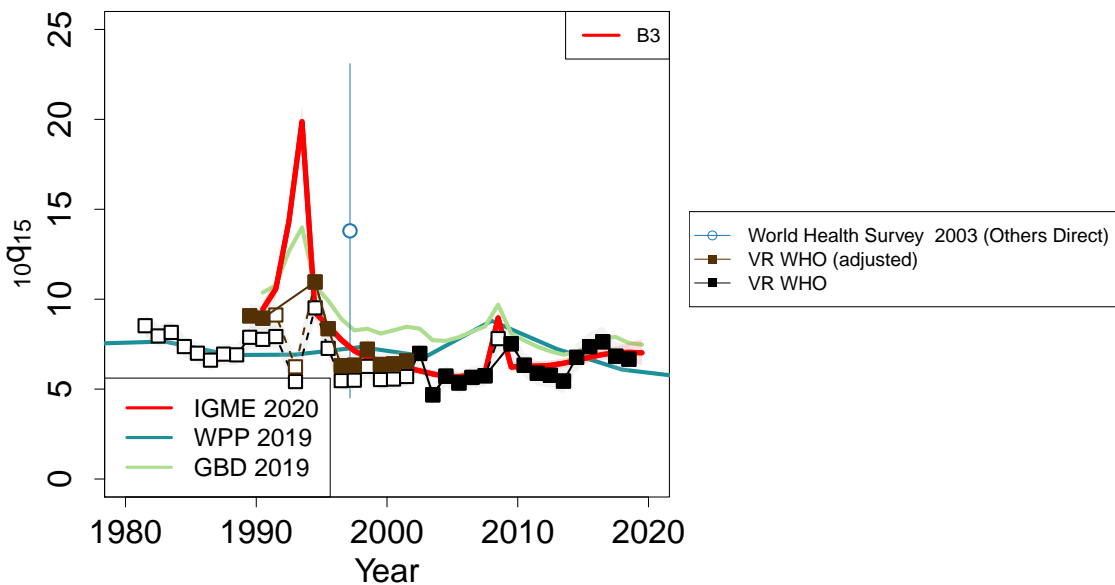



## Germany

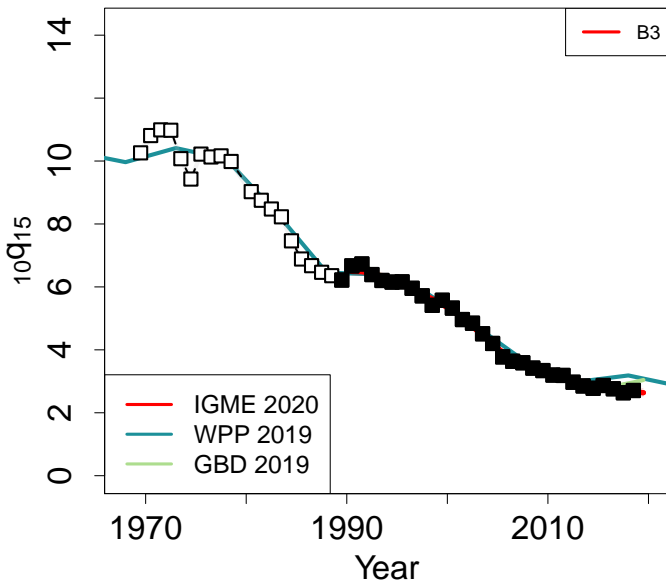

## Ghana

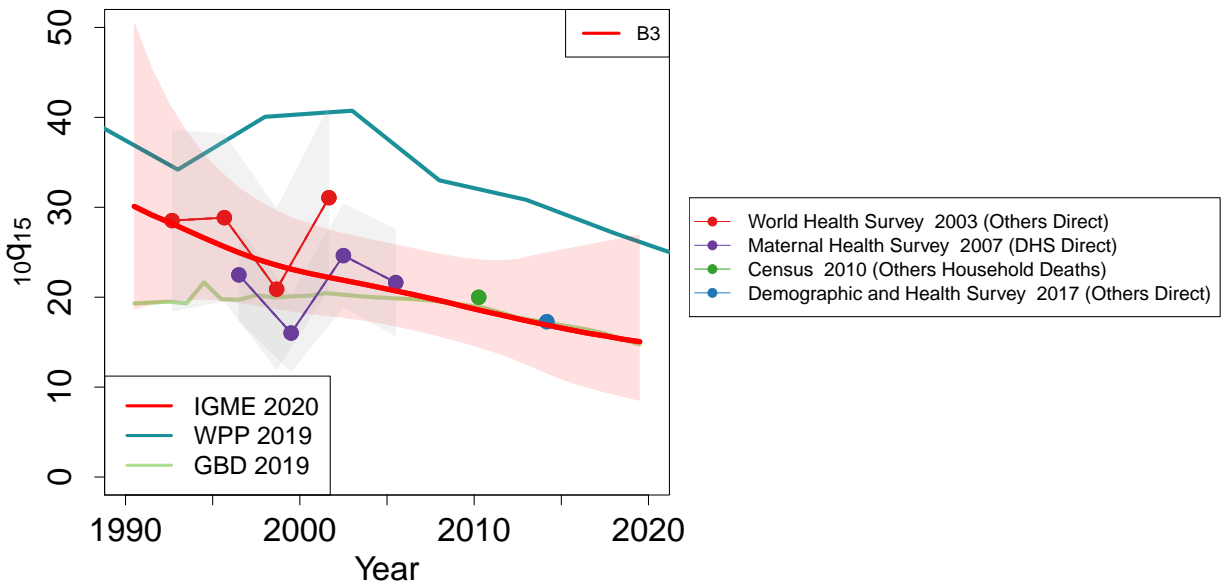

### Greece

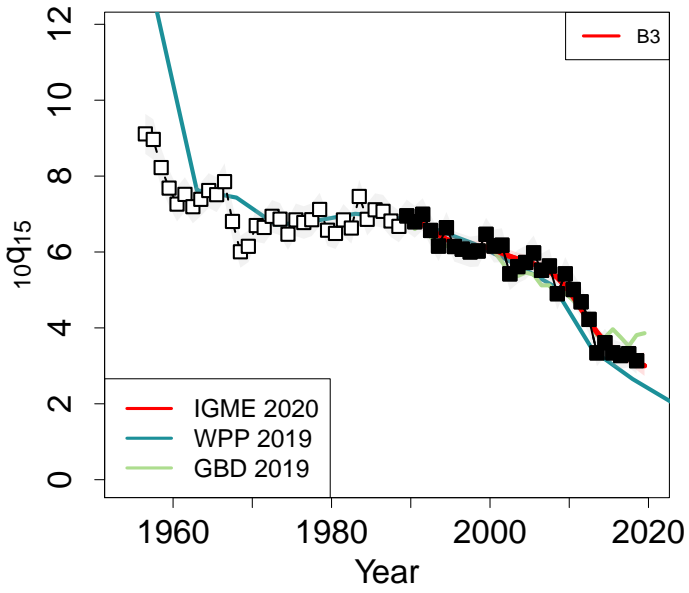

### Grenada

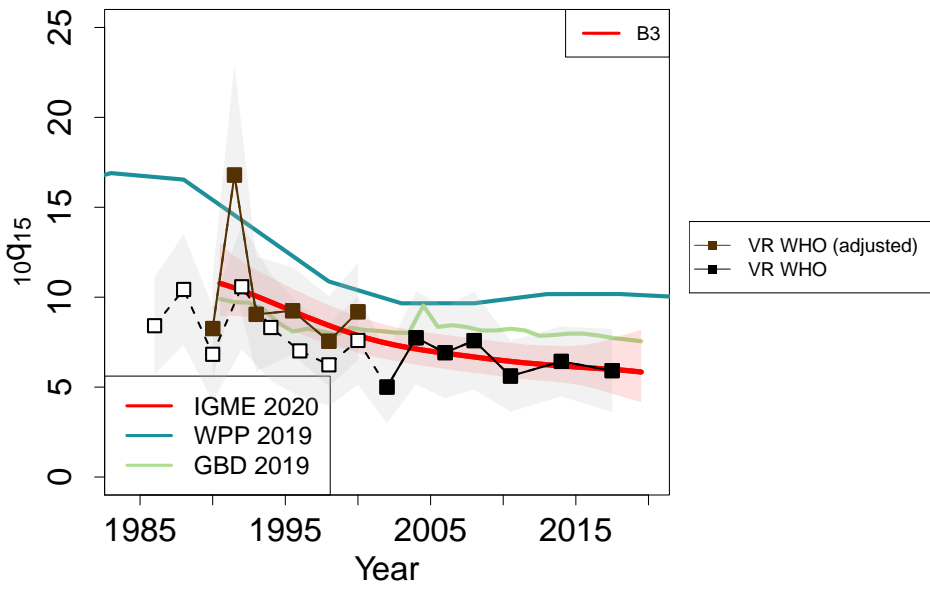

## Guatemala

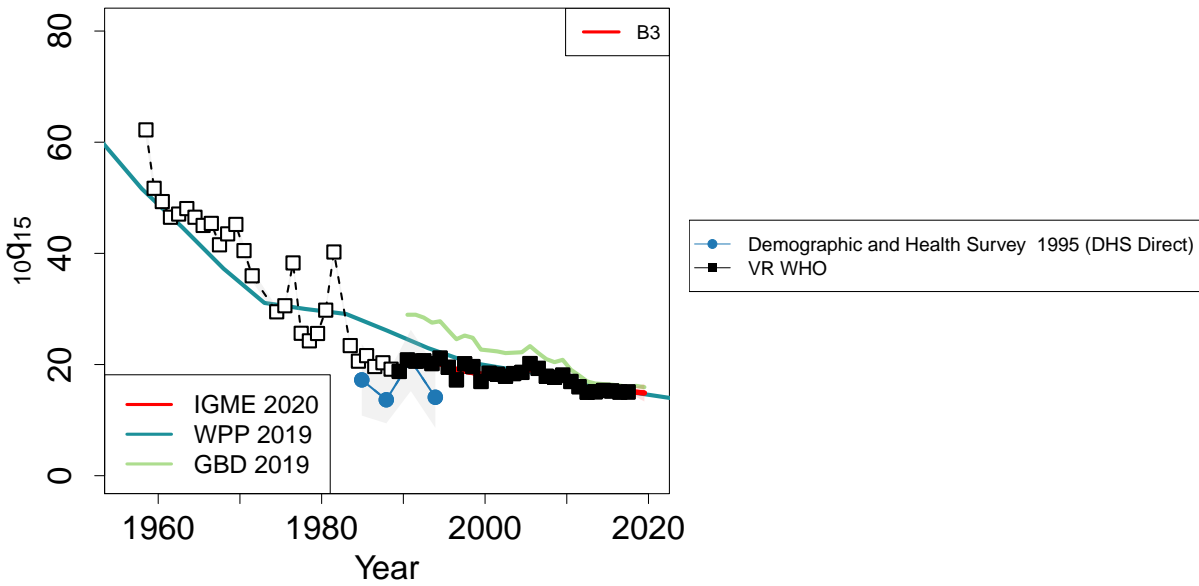

## Guinea

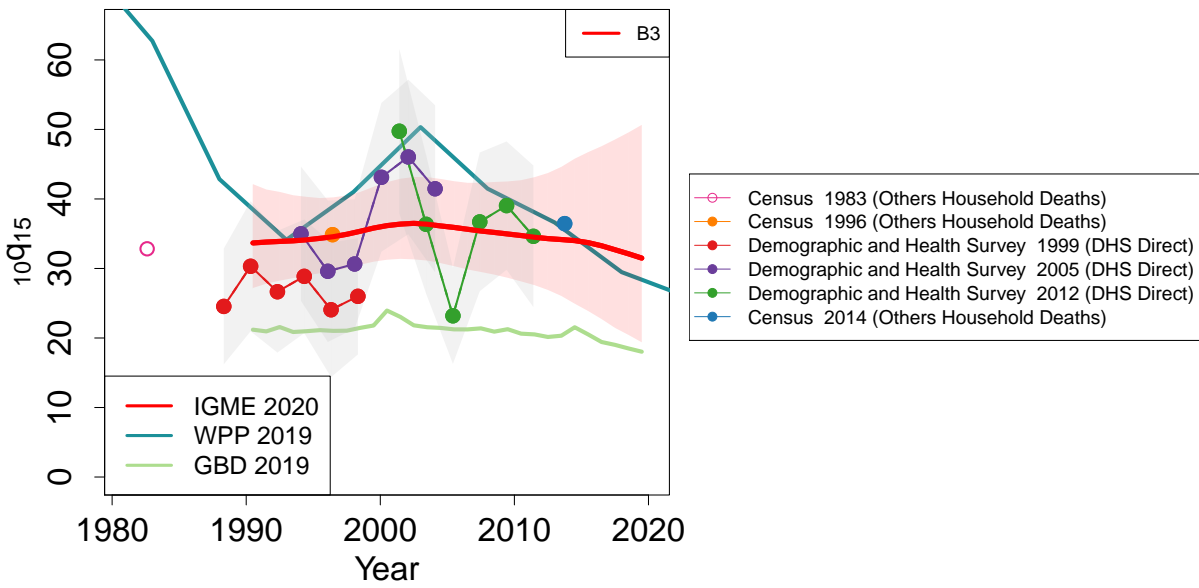

## Guinea-Bissau

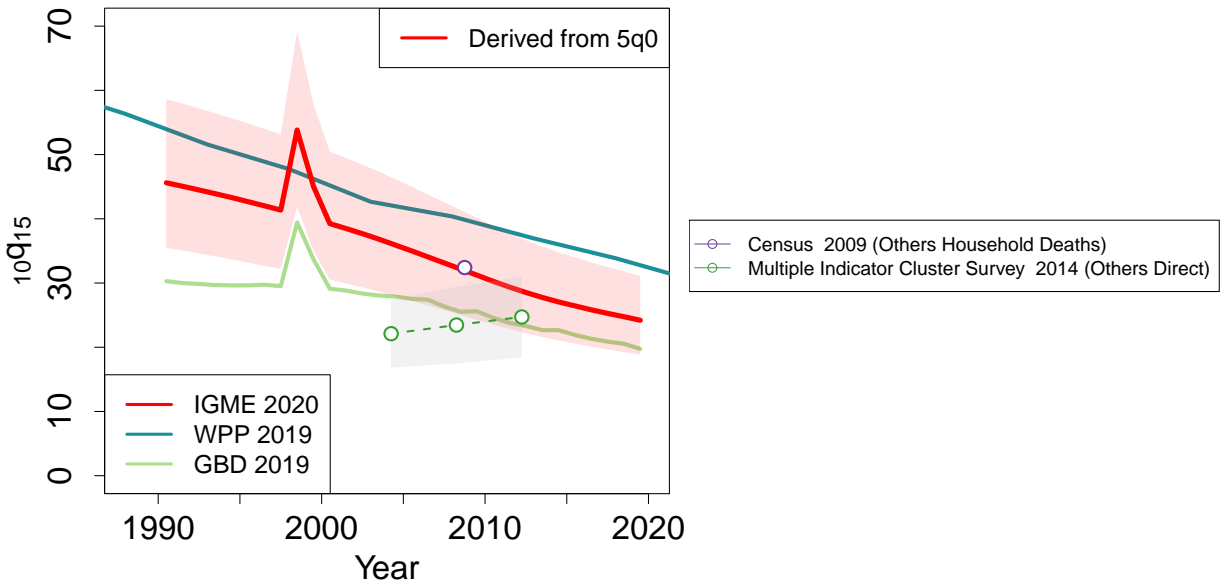

## Guyana

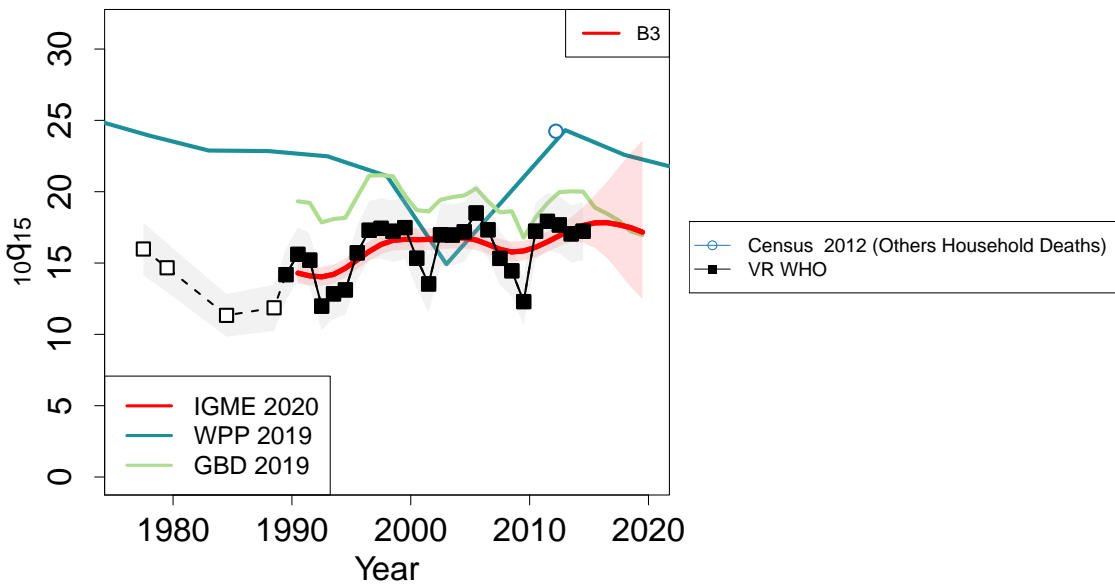

## Haiti

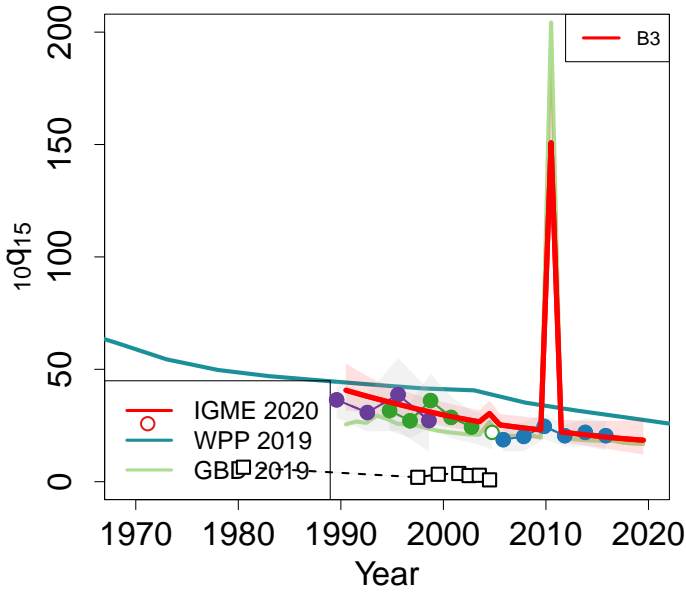

## Honduras

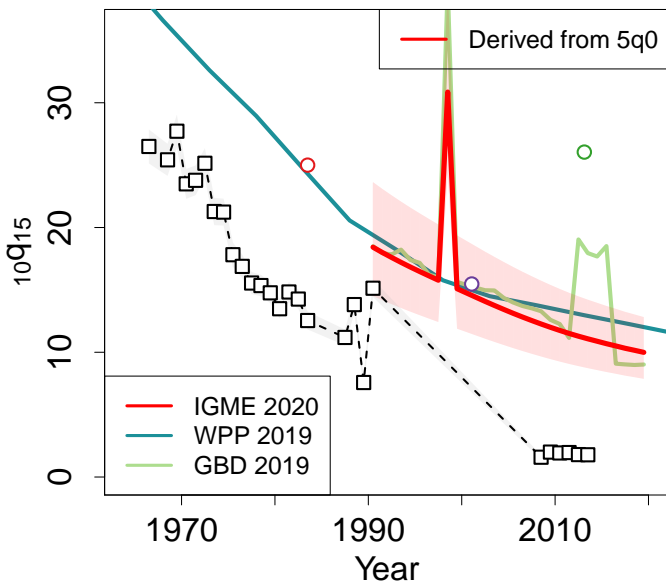

## Hungary

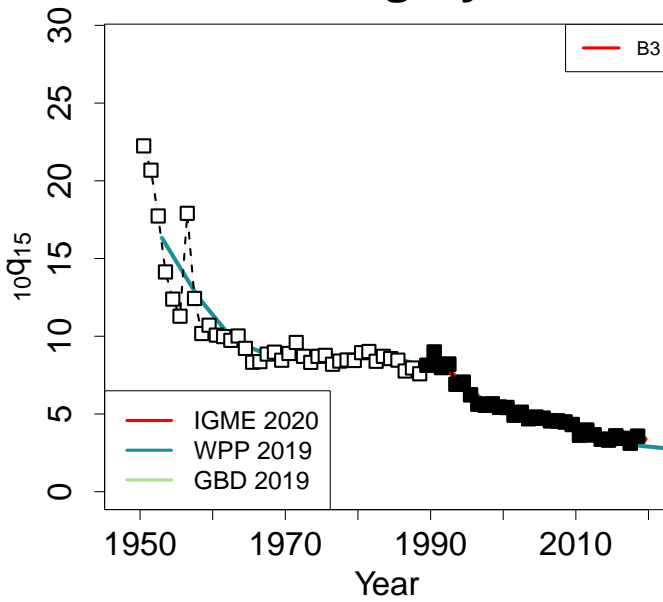

## Iceland

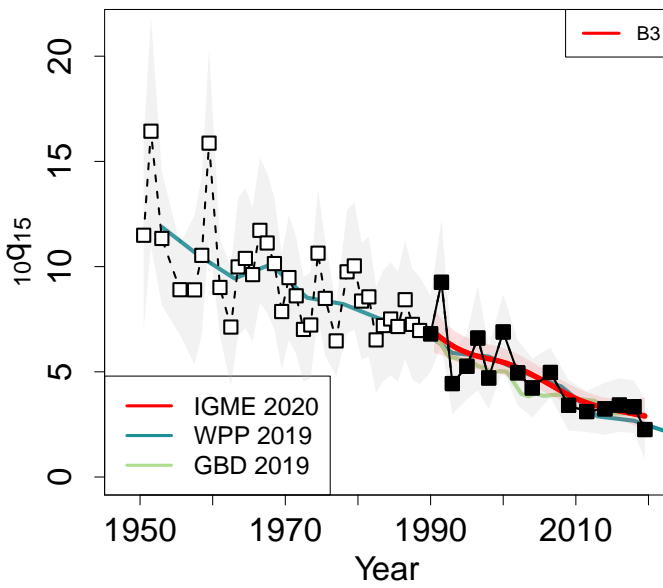

### India

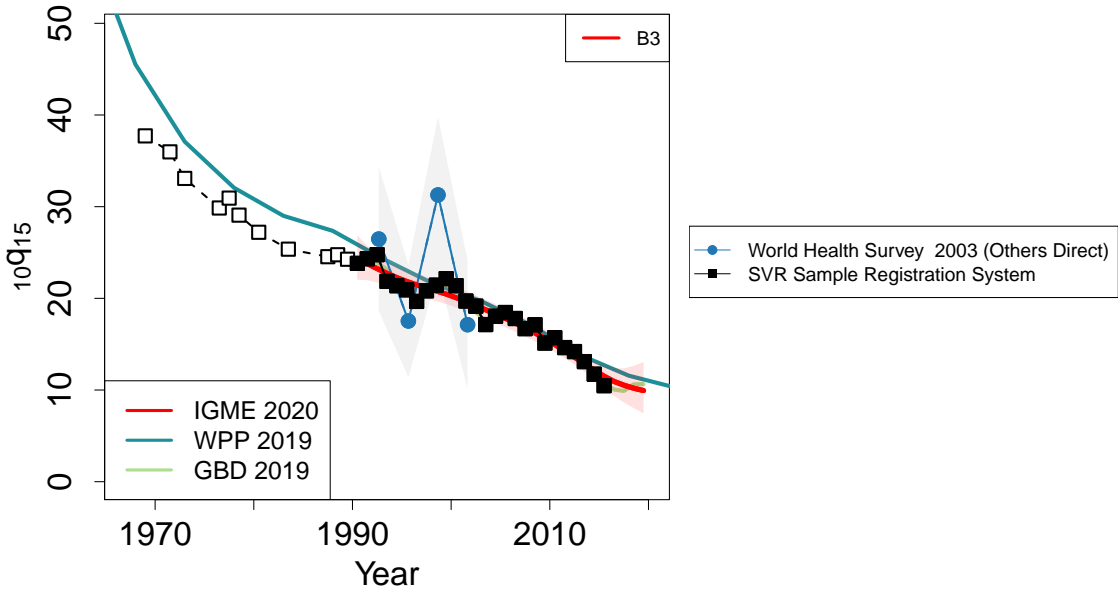

### Indonesia

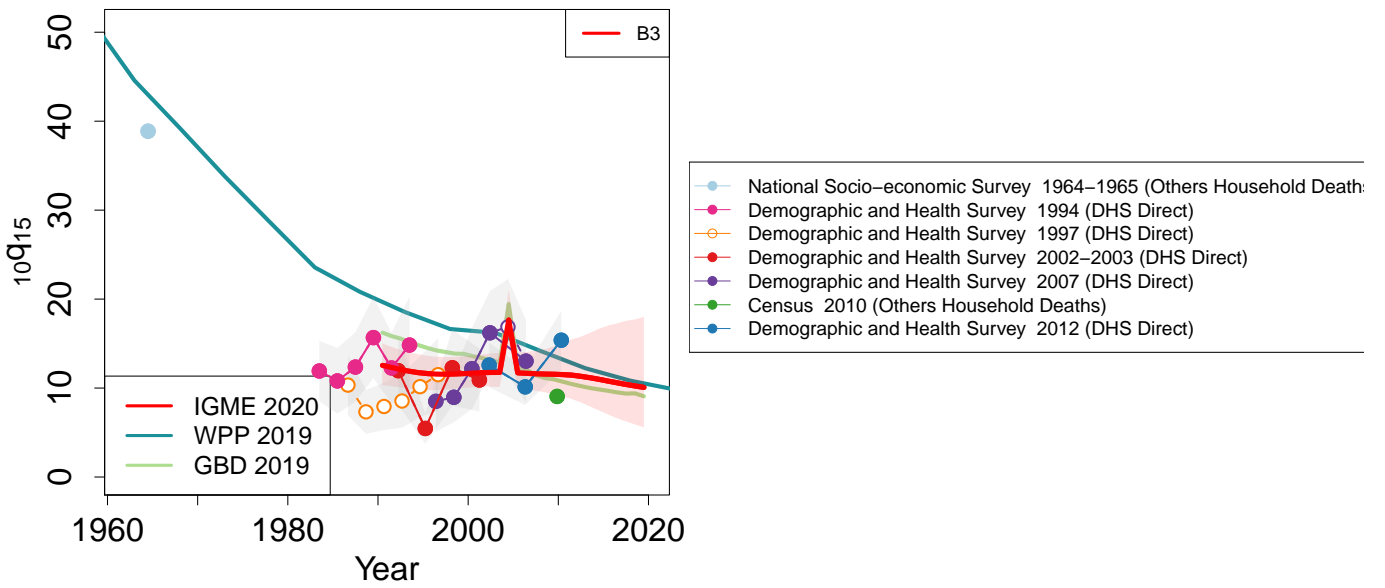

### Iran

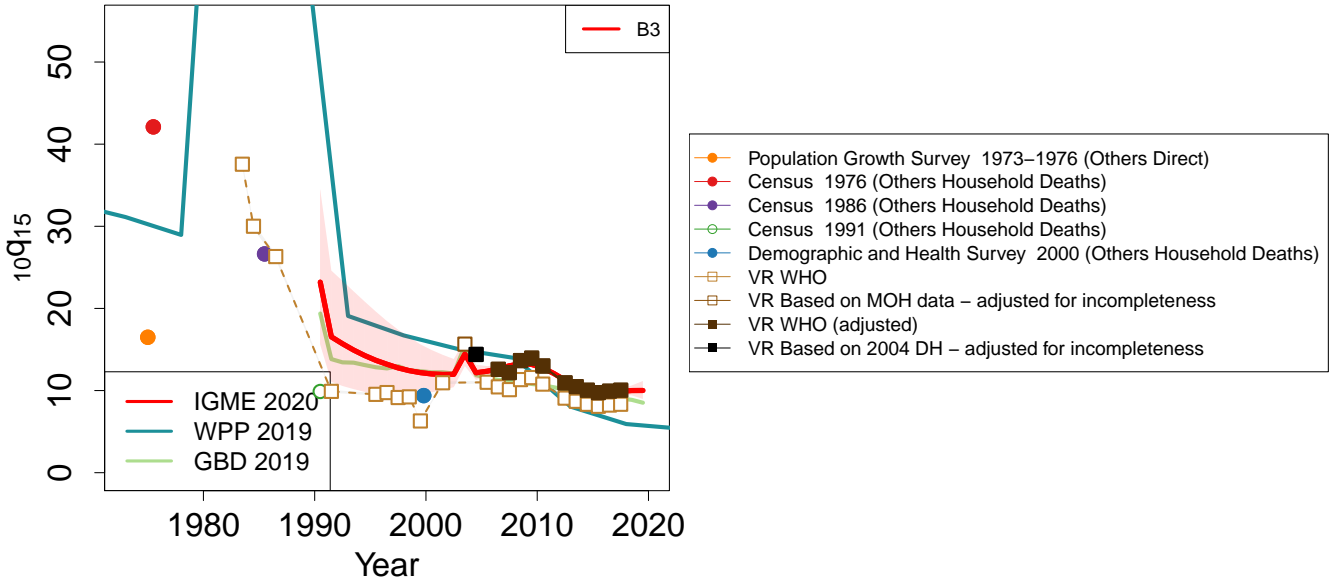

### Iraq

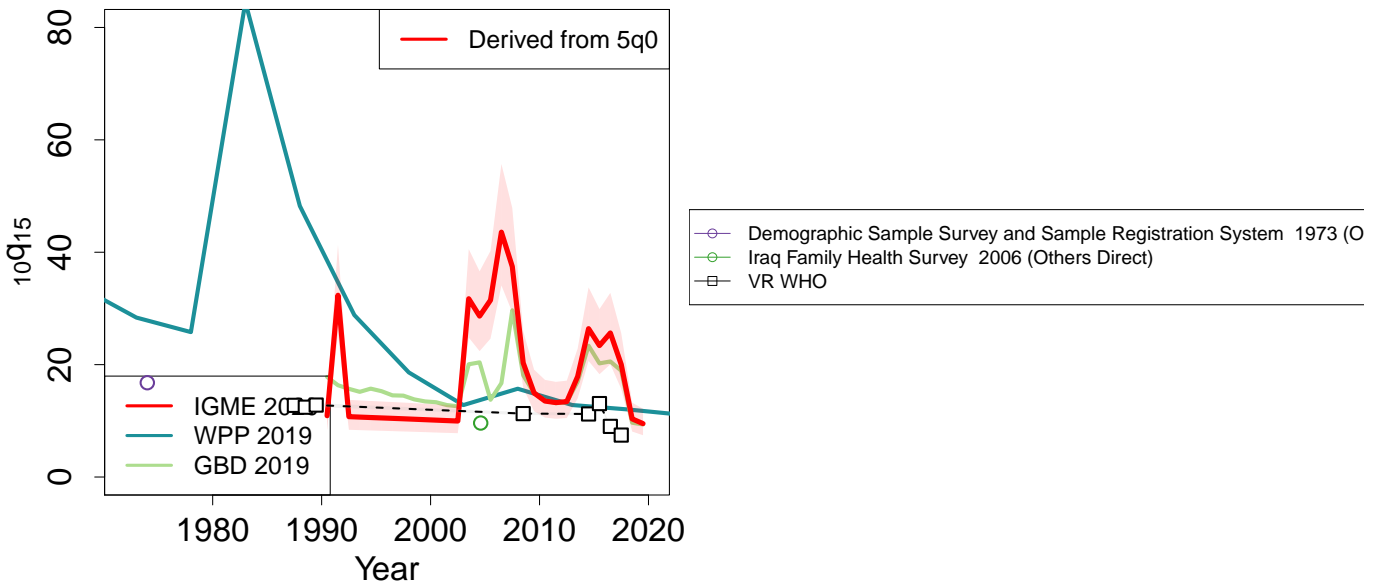



### Ireland

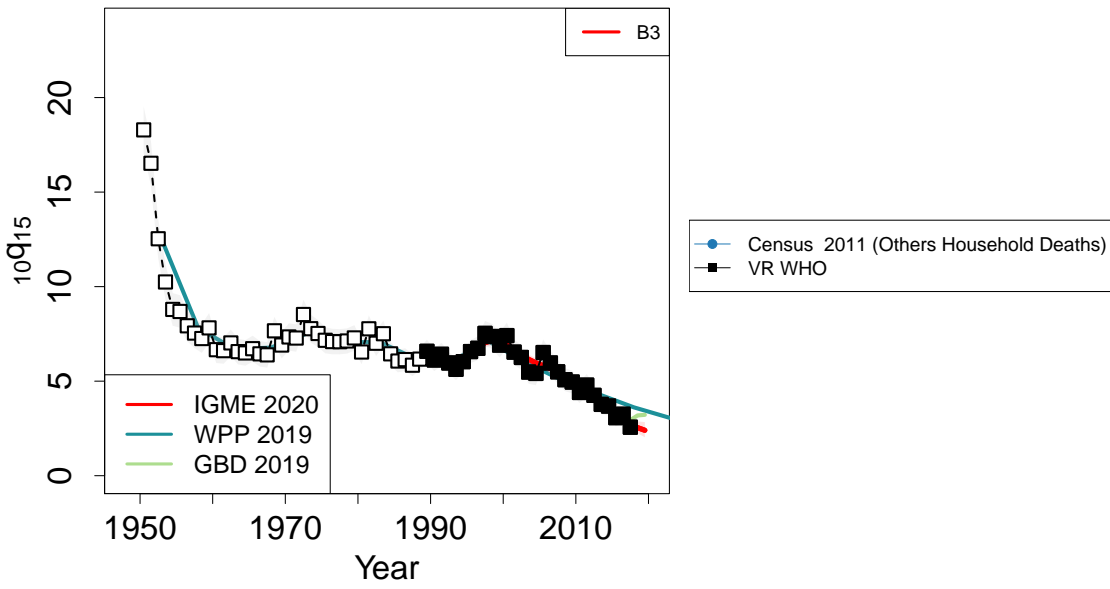

### Israel

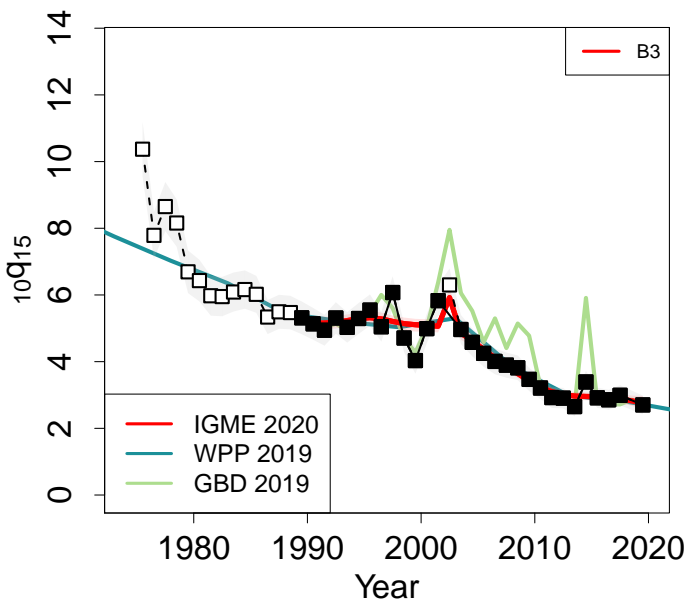

## Italy

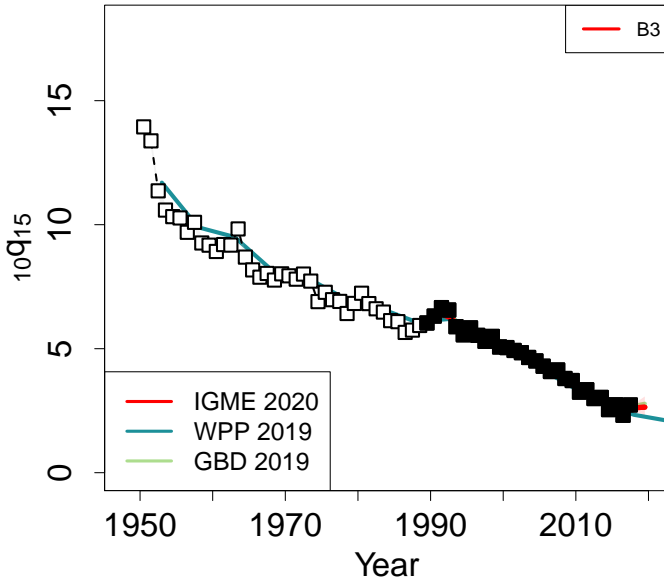

## Jamaica

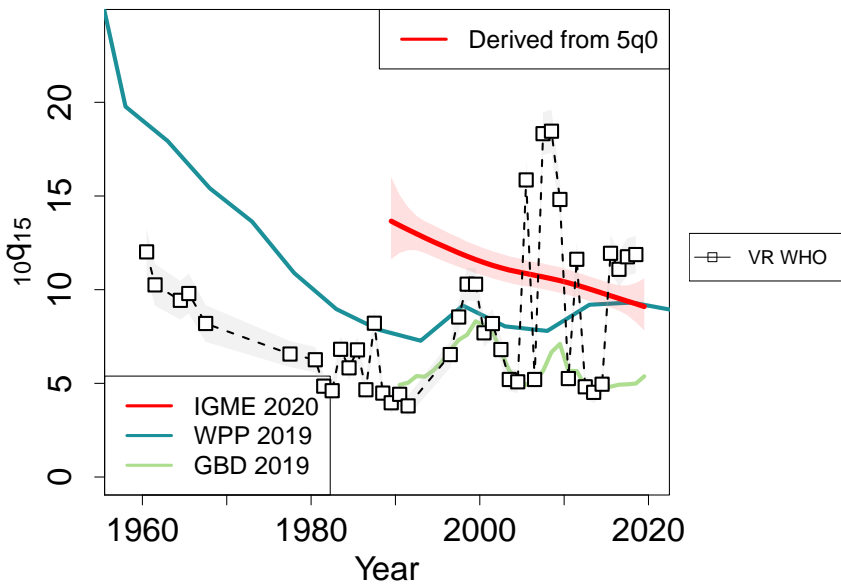

### Japan

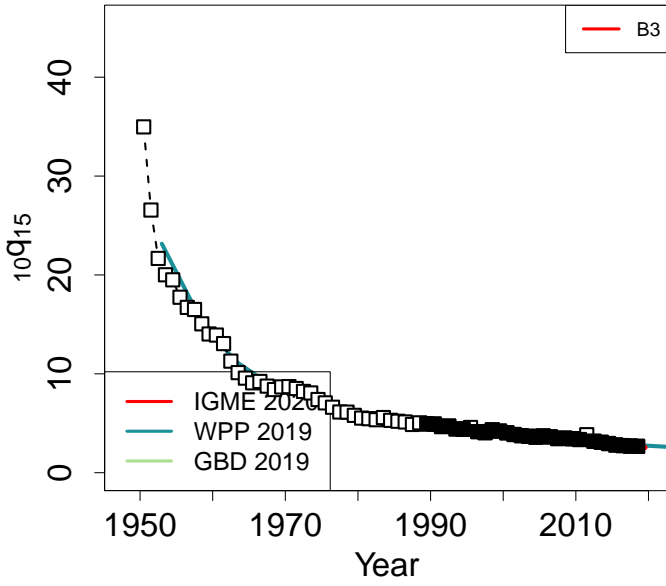

### Jordan

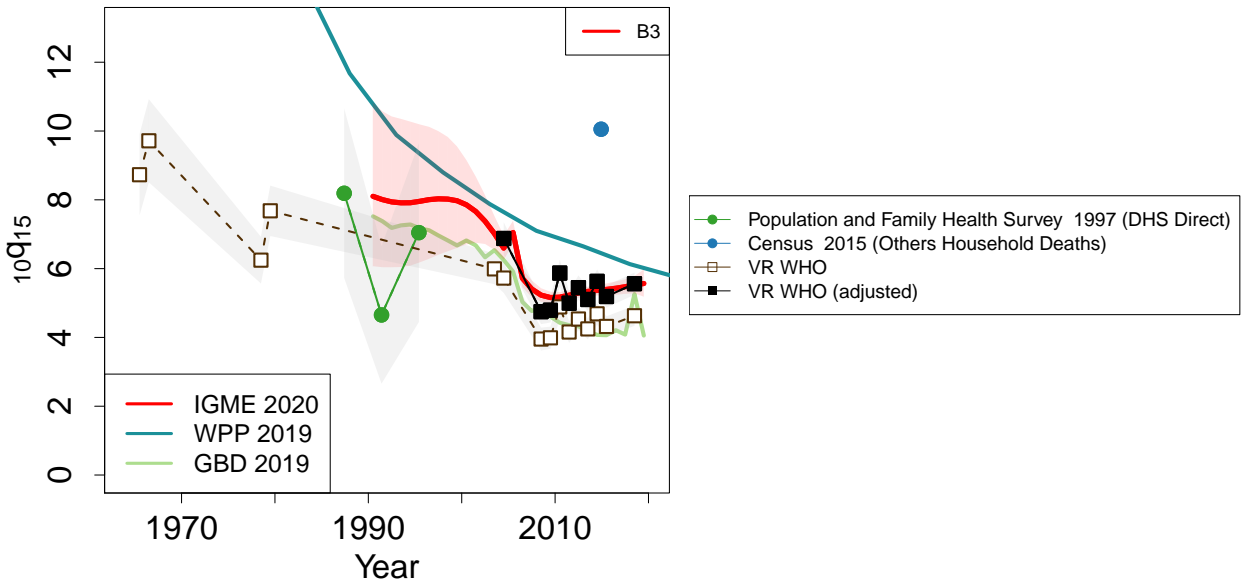

## Kazakhstan

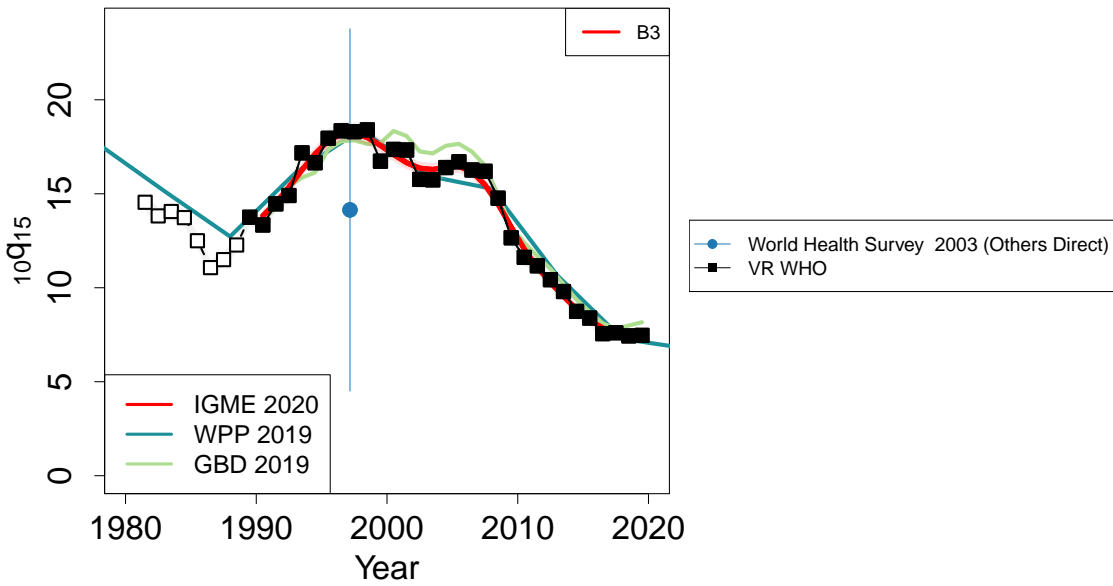

## Kenya

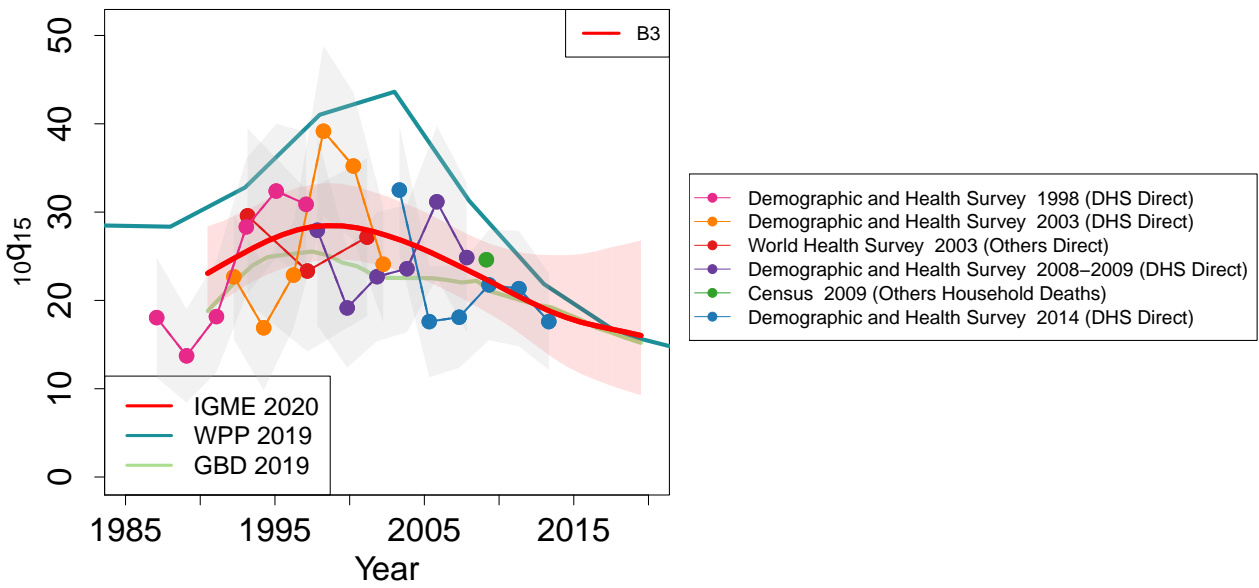

### Kiribati

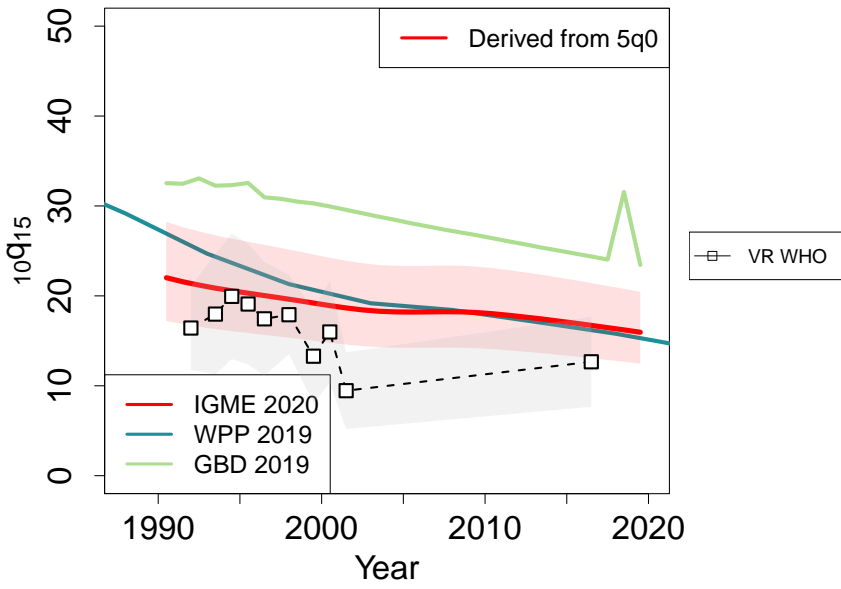

### Korea DPR

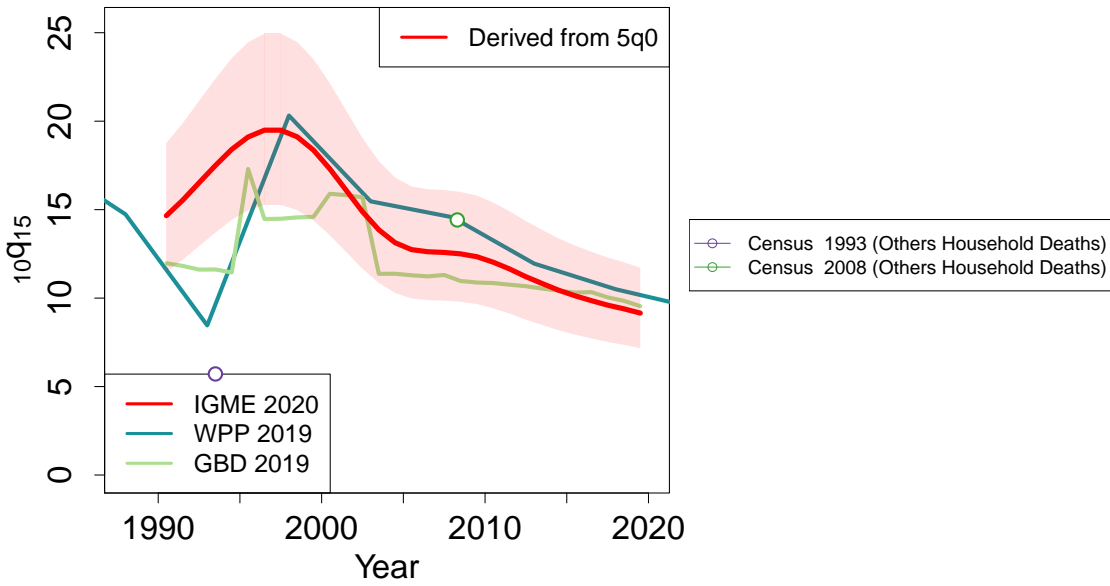

## Korea Rep

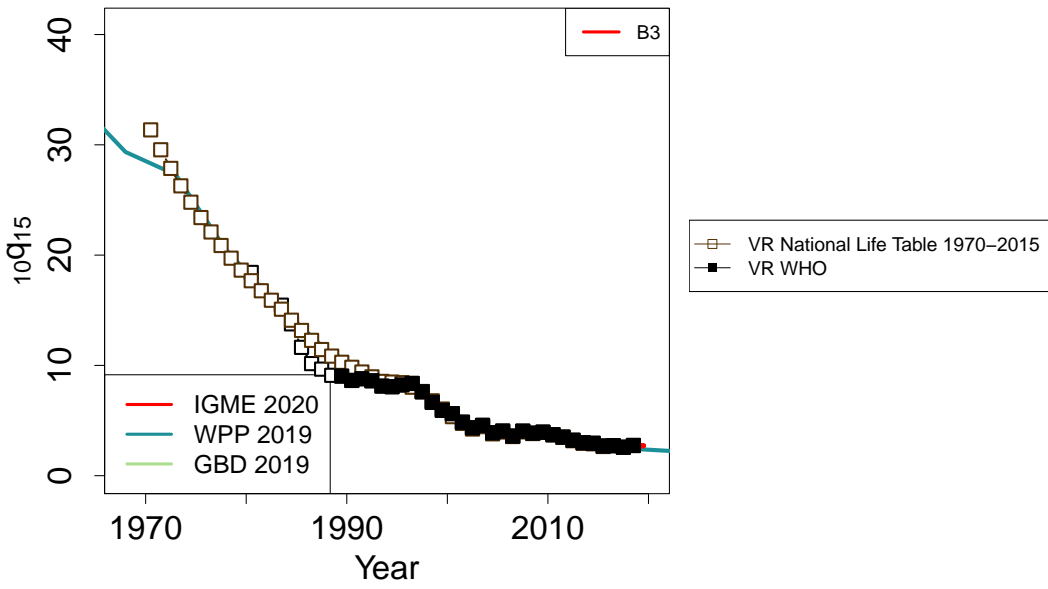

## Kuwait

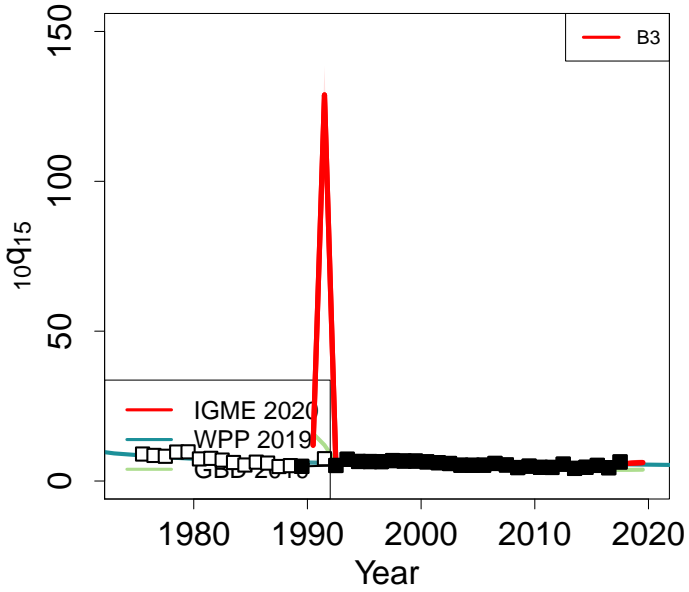

## Kyrgyzstan

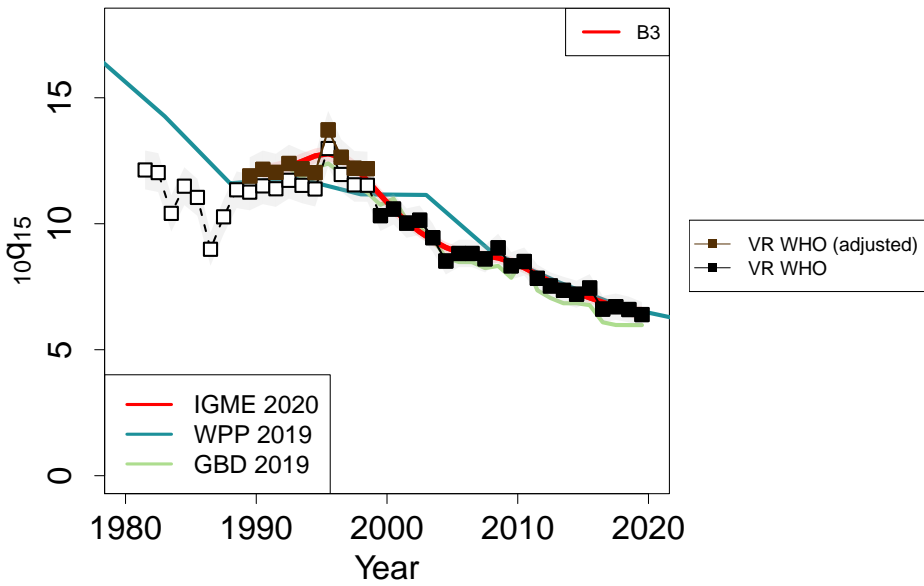

## Lao PDR

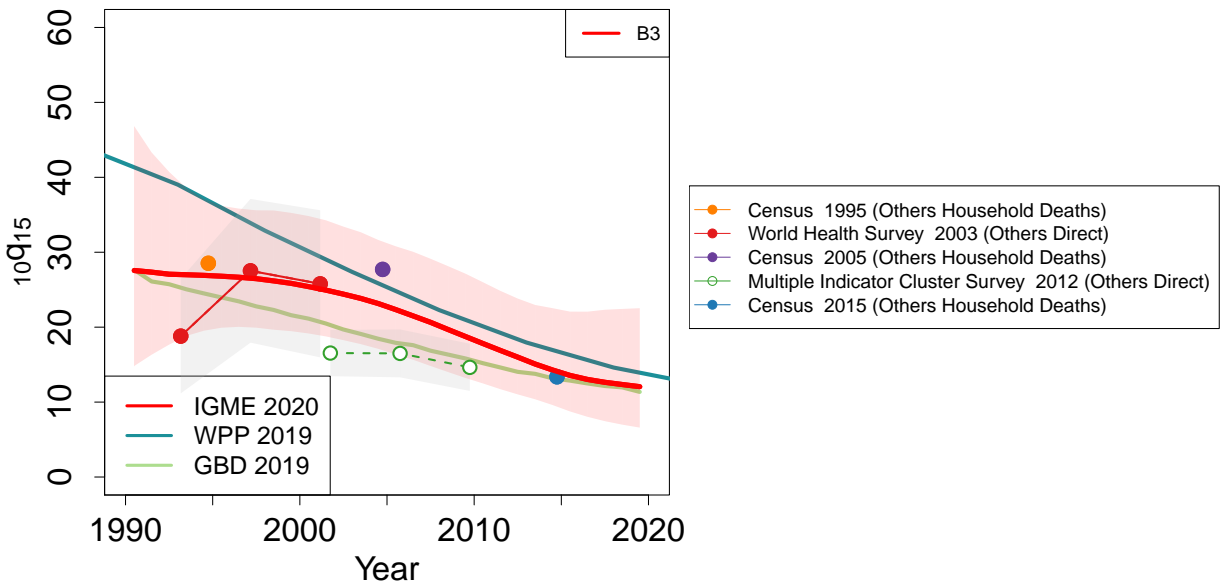

### Latvia

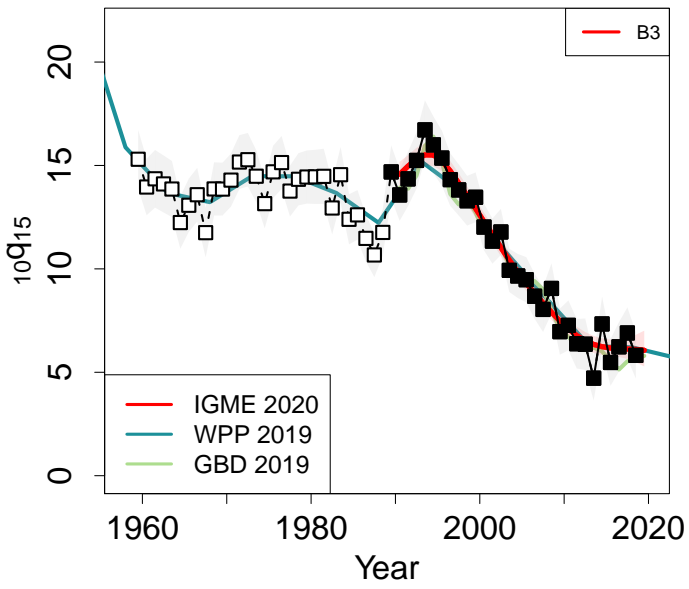

### Lebanon

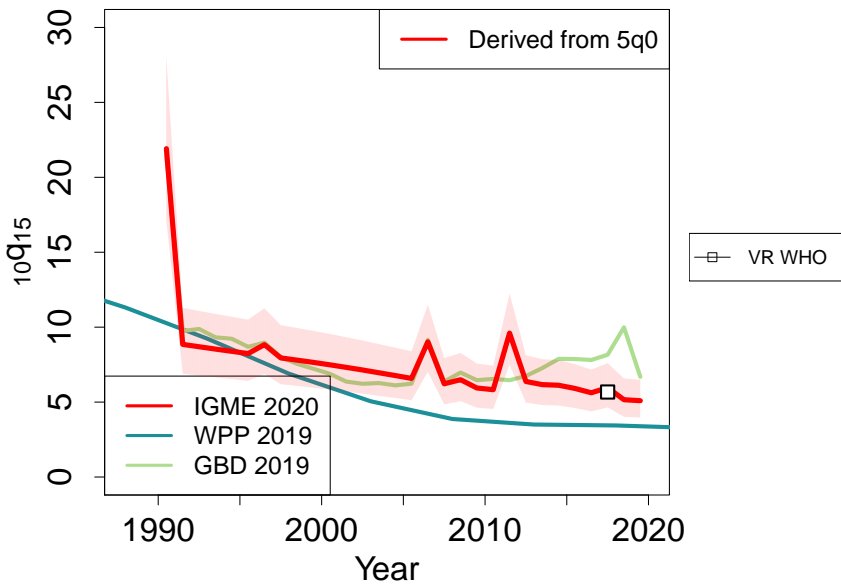



## Lesotho

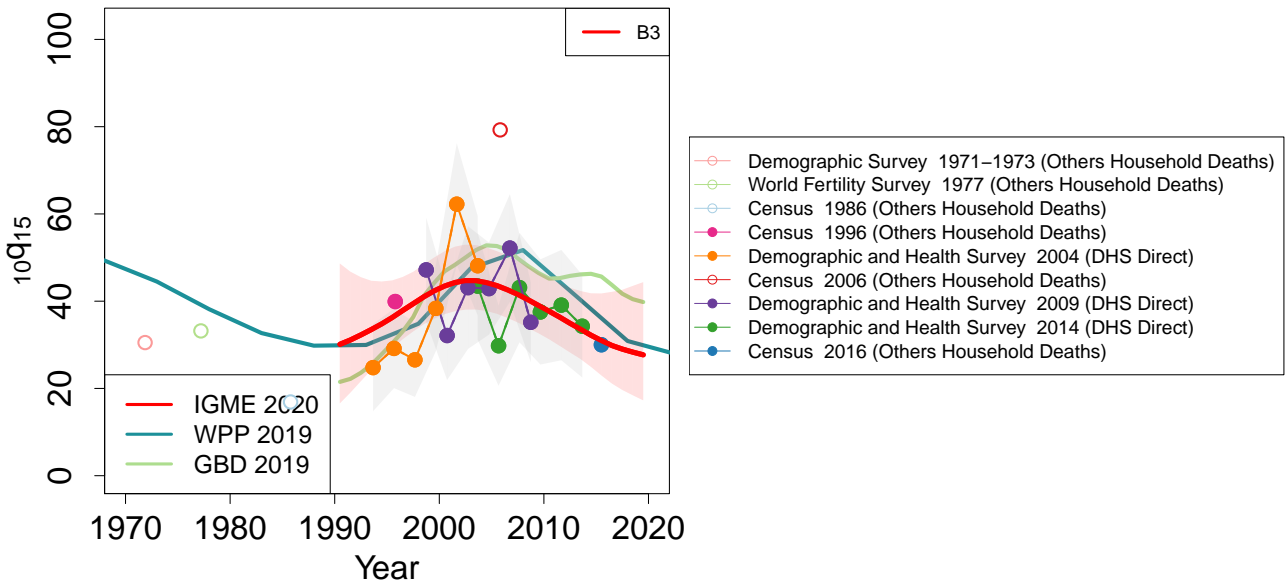

## Liberia

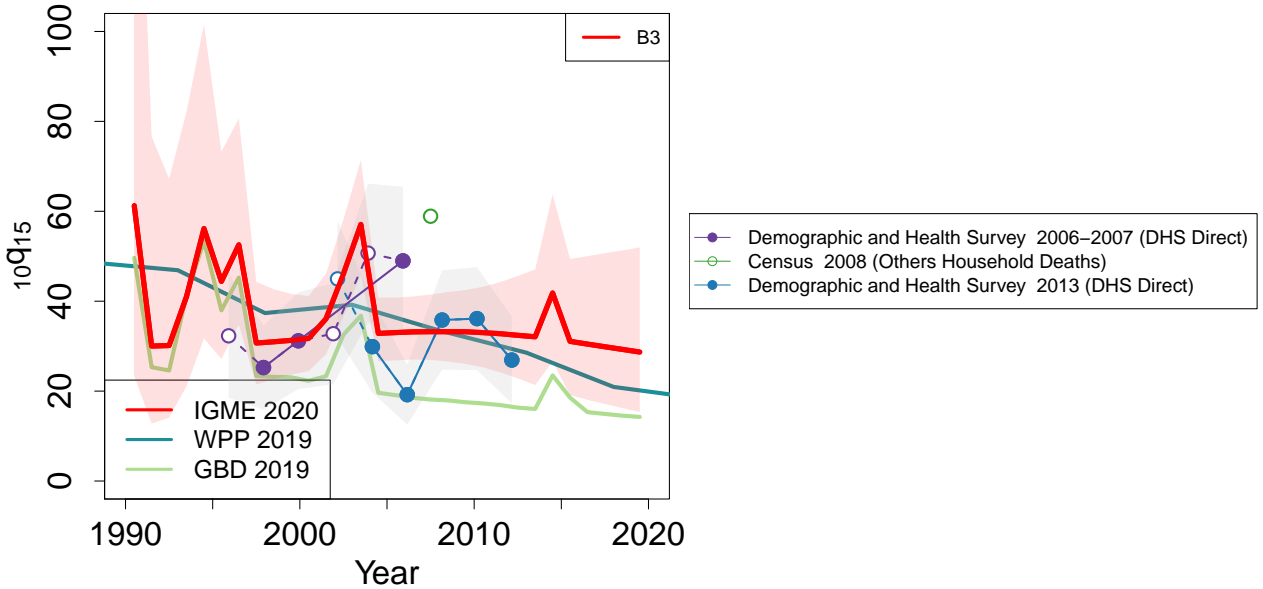

## Libya

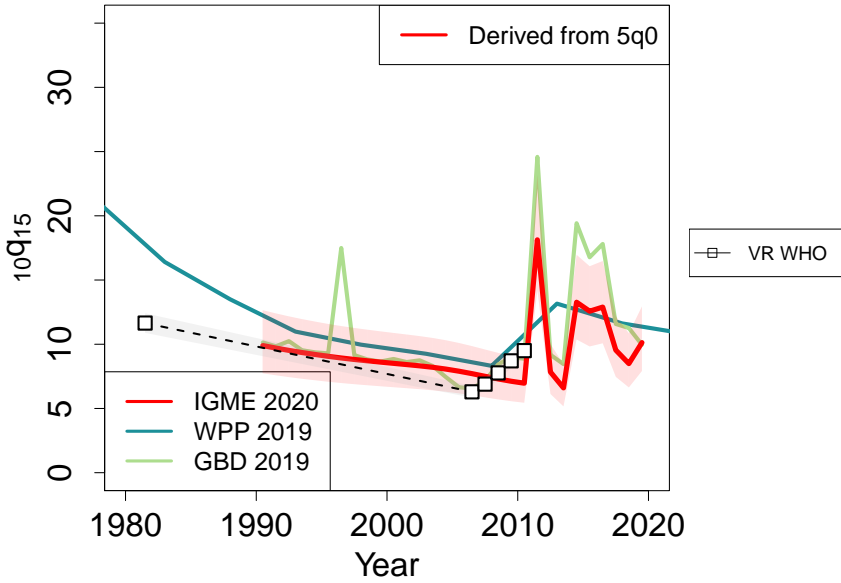

## Lithuania

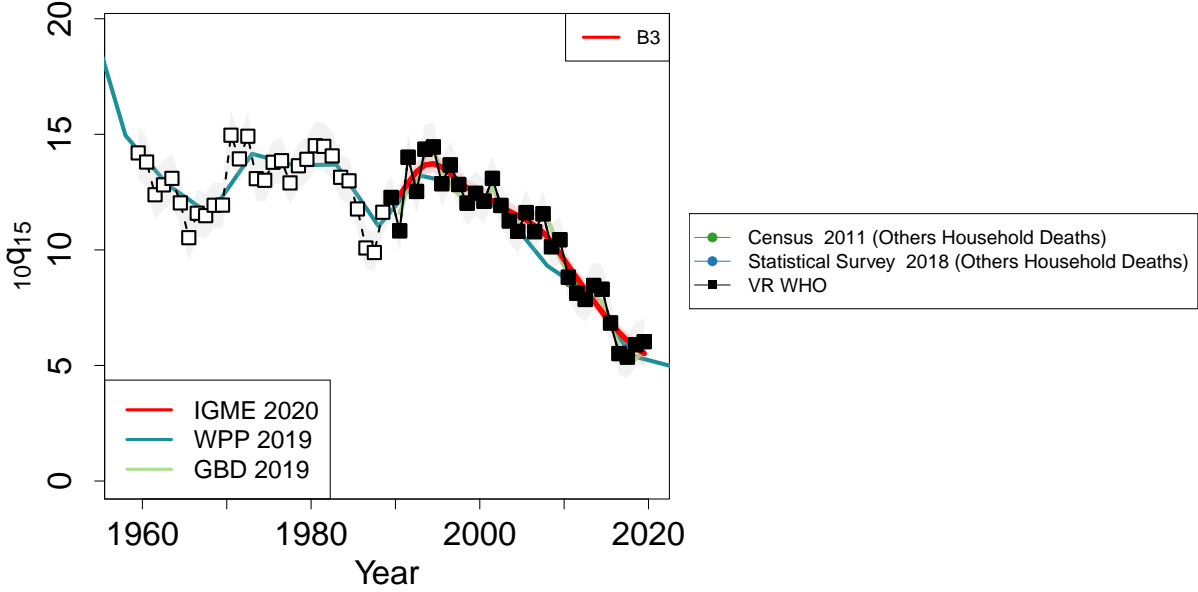

## Luxembourg

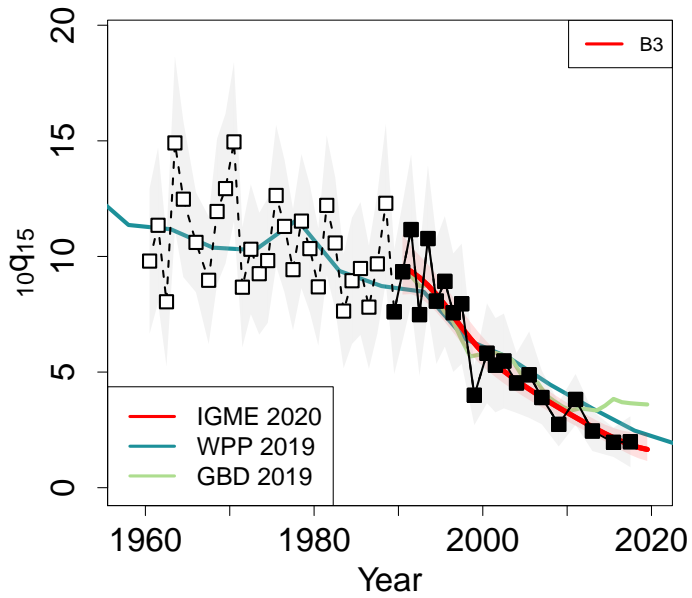

## Macedonia

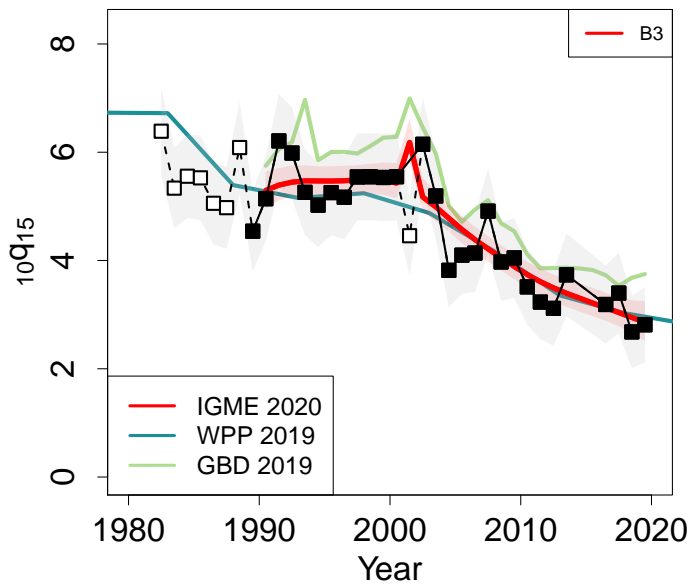

## Madagascar

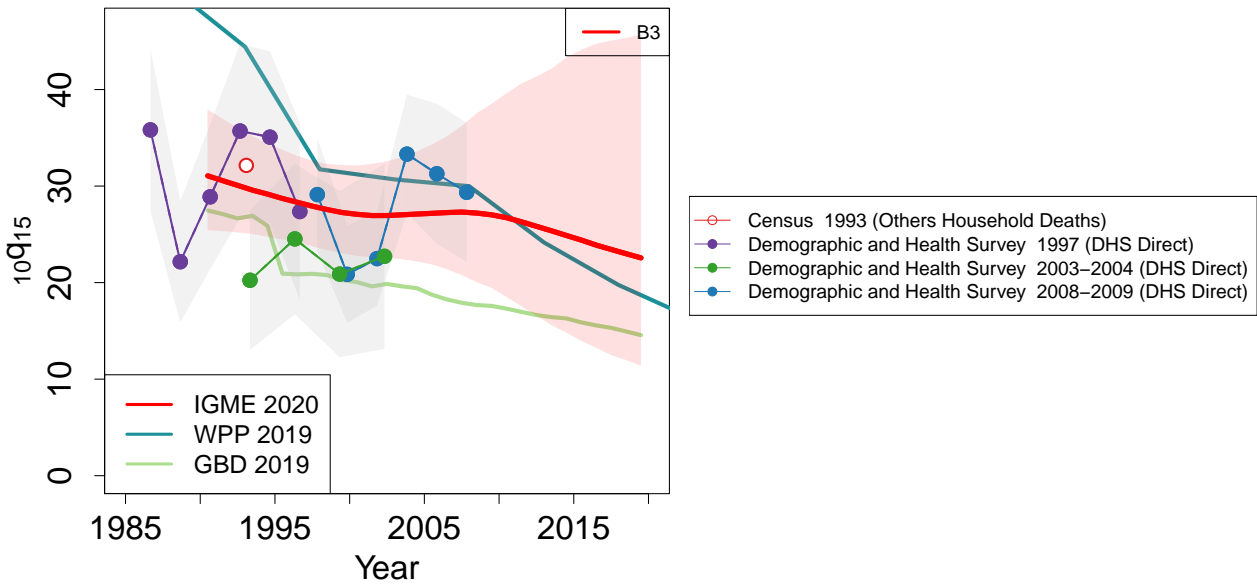

## Malawi

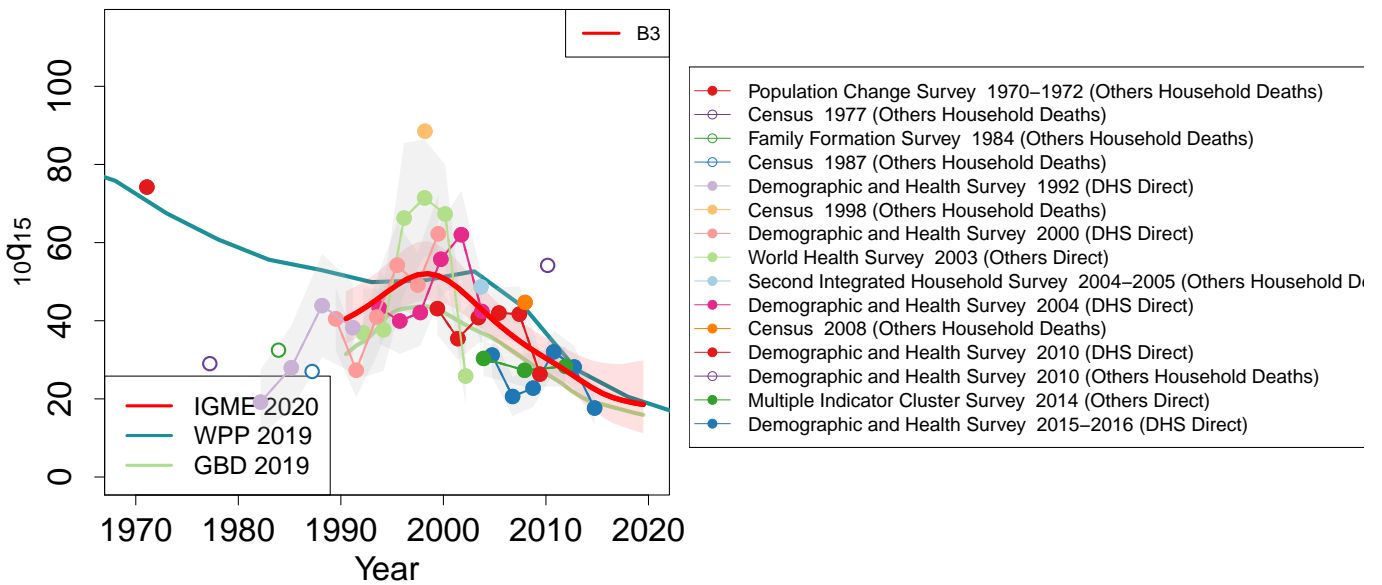

### Malaysia

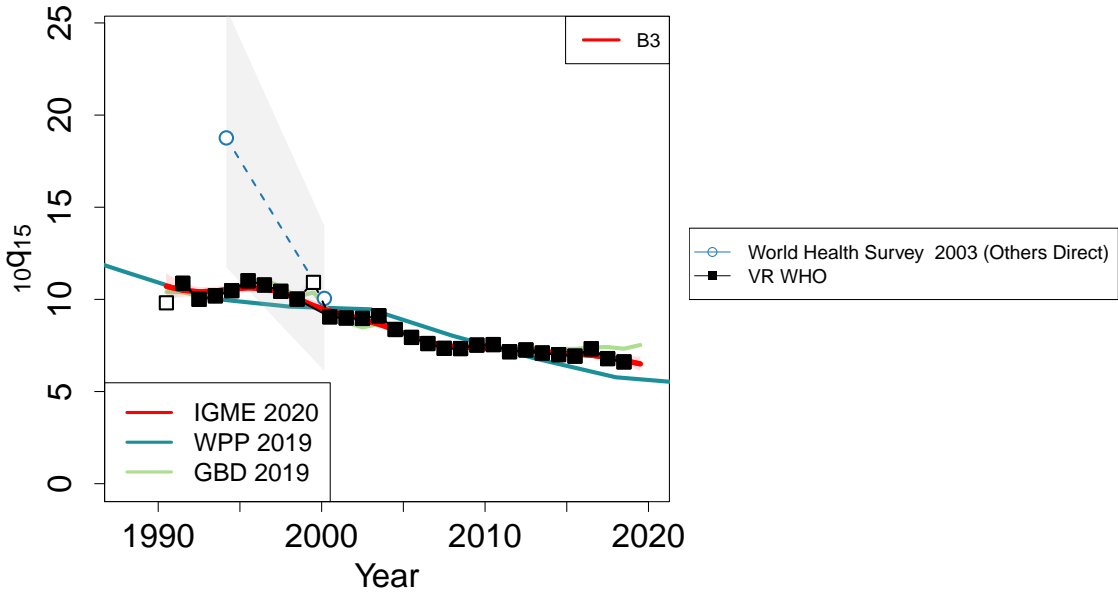

### Maldives

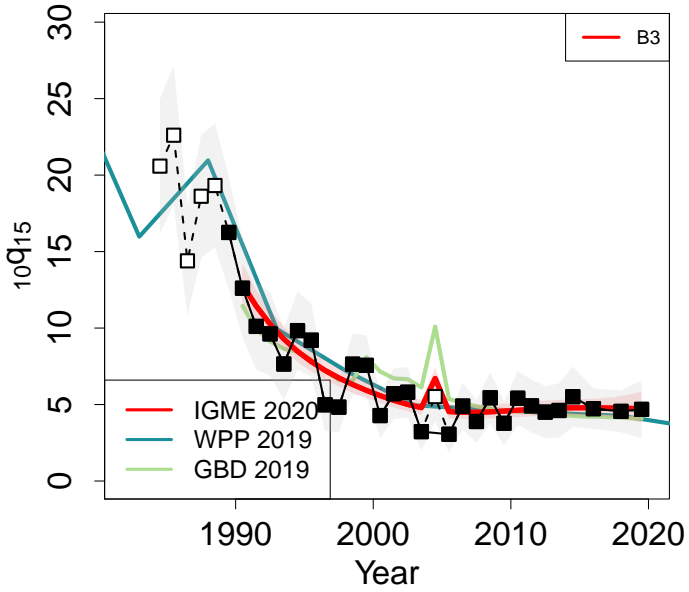

### Mali

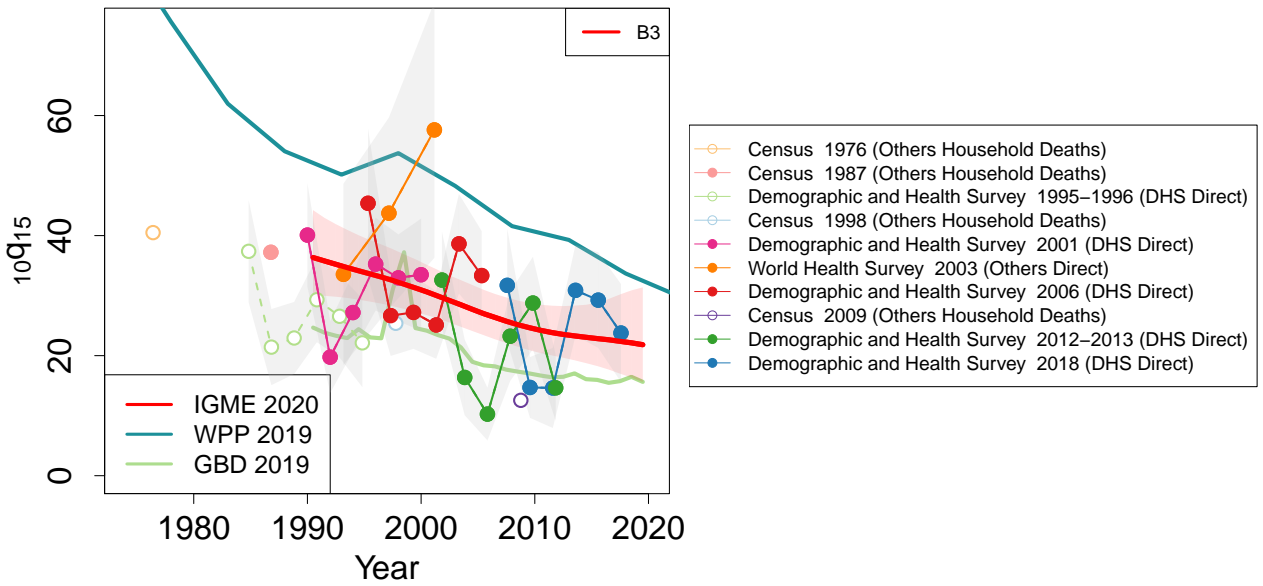

### Malta

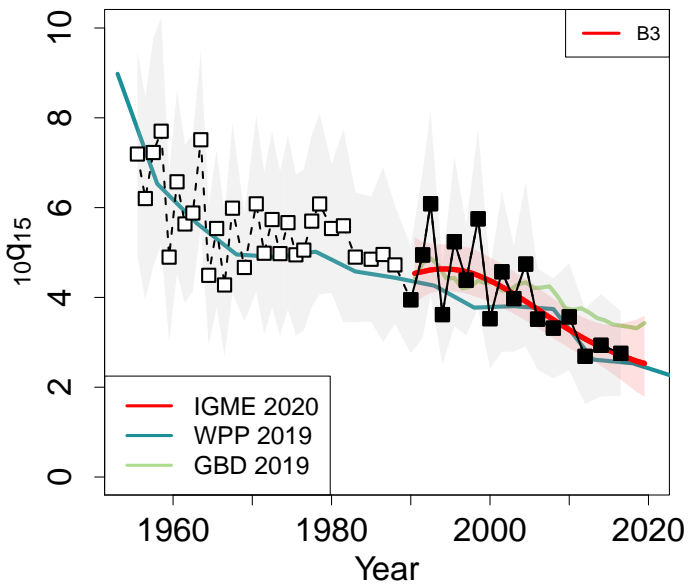

## Marshall Islands

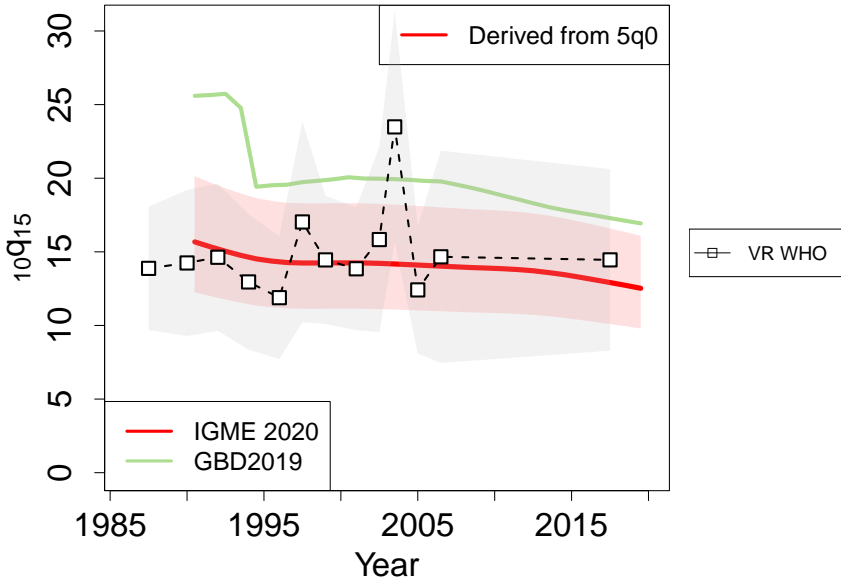

## Mauritania

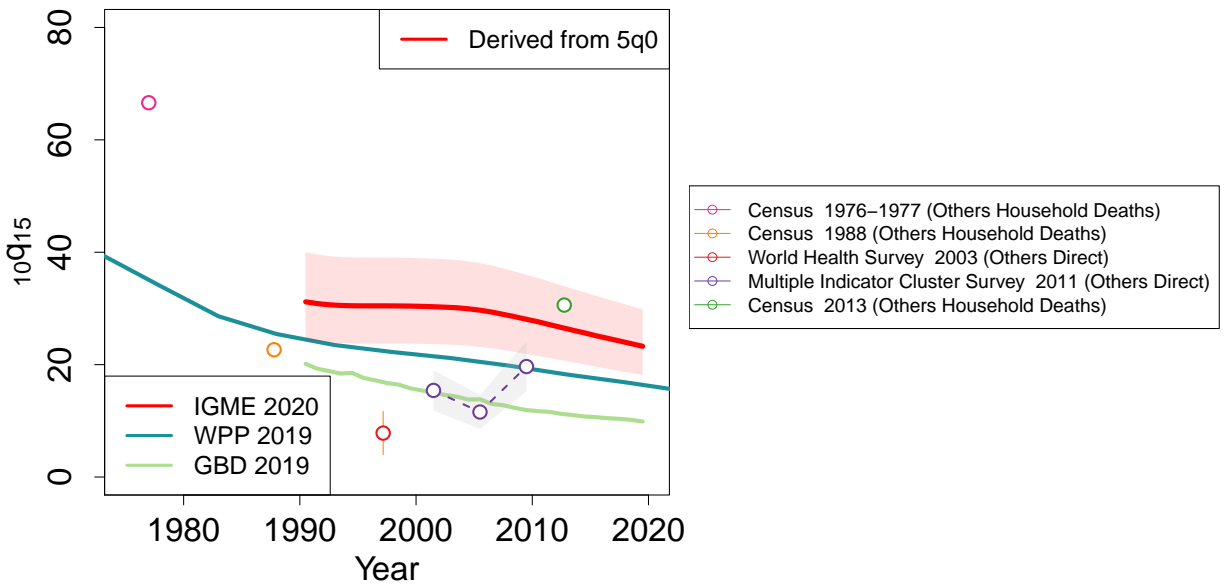

## Mauritius

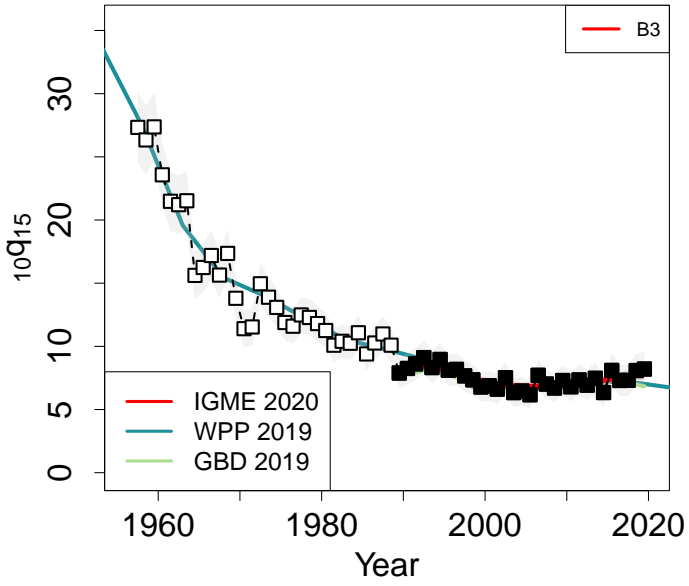

## Mexico

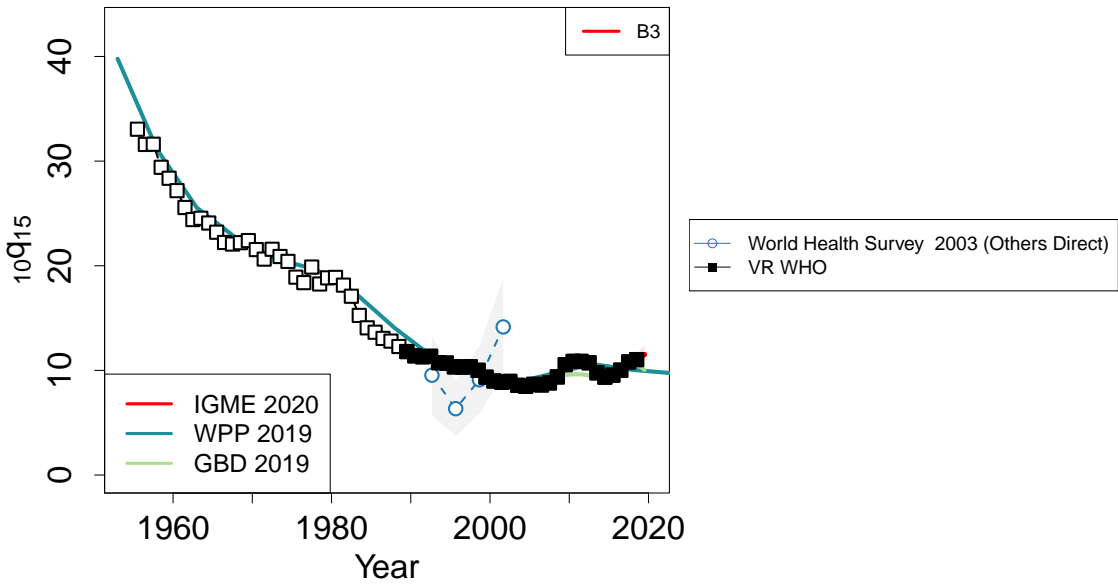



### Moldova

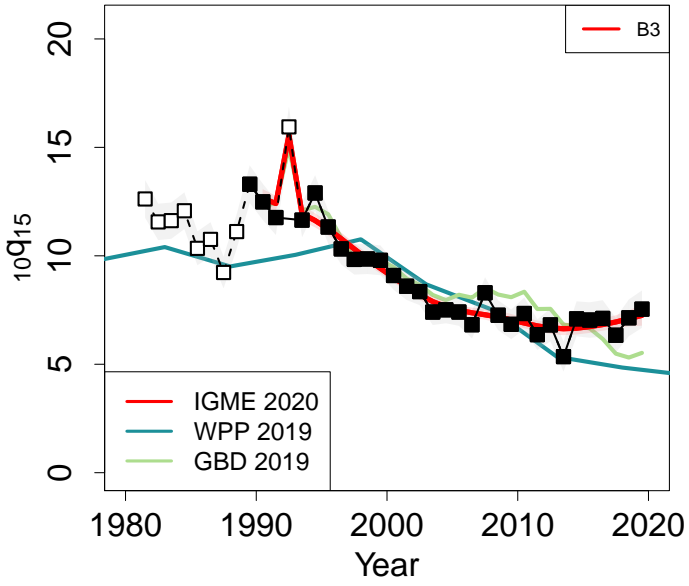

### Monaco

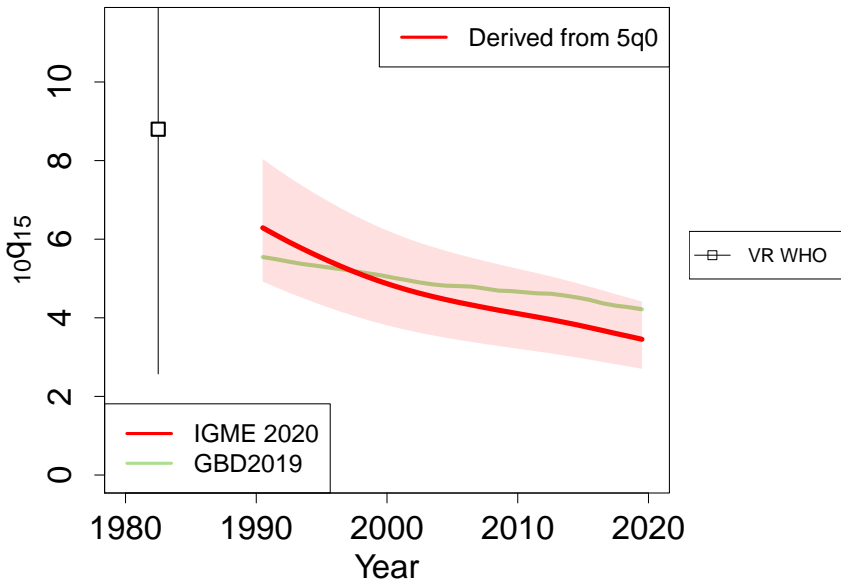

## Mongolia

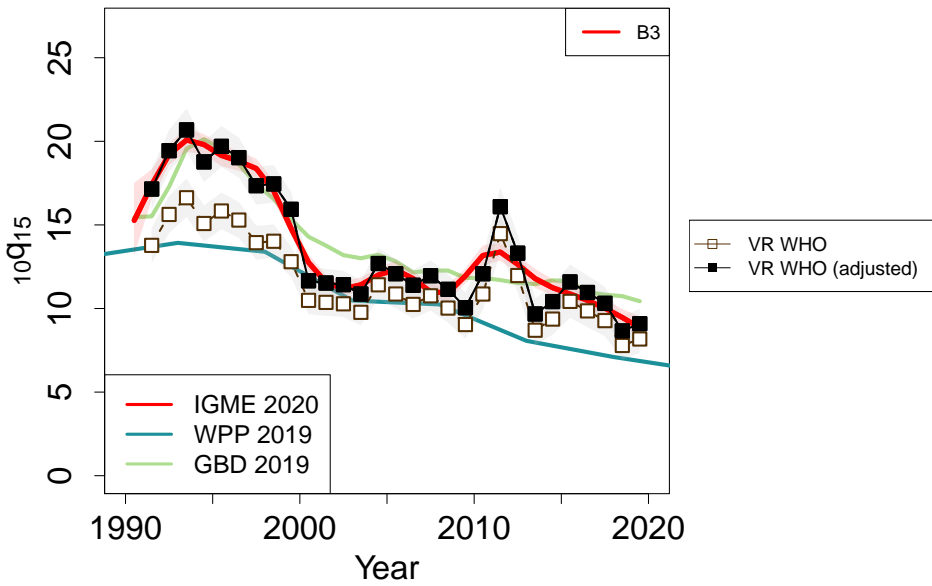

## Montenegro

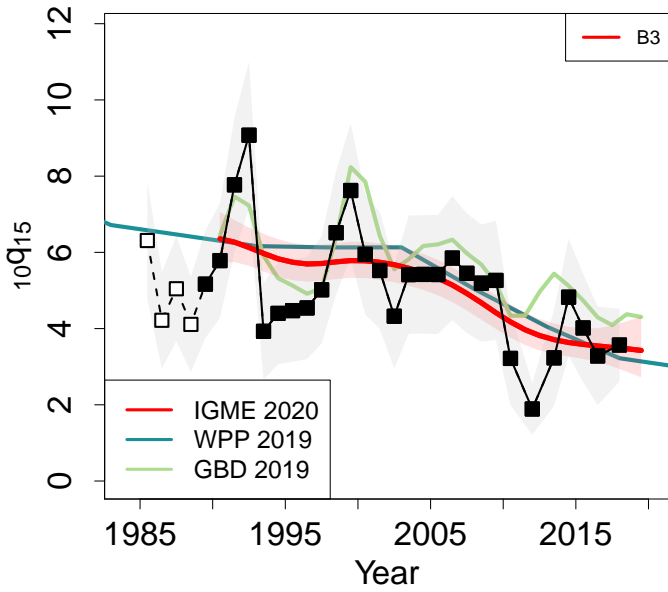

### Morocco

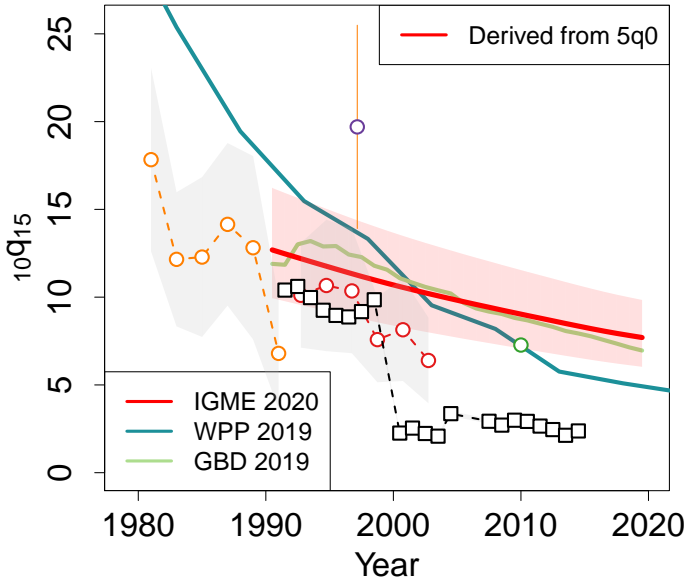

- Demographic and Health Survey 1992 (DHS Direct)
- Demographic and Health Survey 2003–2004 (DHS Direct)
- World Health Survey 2003 (Others Direct)
- National Demographic Survey with repeated passages 2009–2010 (Oth
- VR WHO

### Mozambique

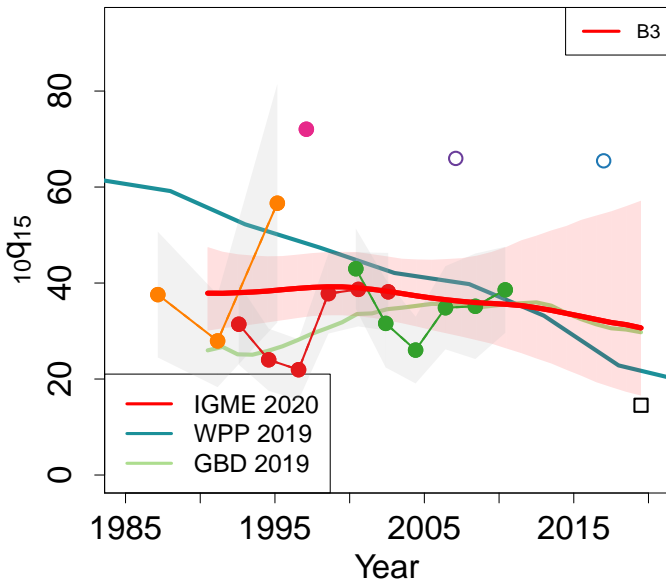

- Census 1997 (Others Household Deaths)
- Demographic and Health Survey 1997 (DHS Direct)
- Demographic and Health Survey 2003 (DHS Direct)
- Census 2007 (Others Household Deaths)
- Demographic and Health Survey 2011 (DHS Direct)
- Census 2017 (Others Household Deaths)
- VR WHO

## Myanmar

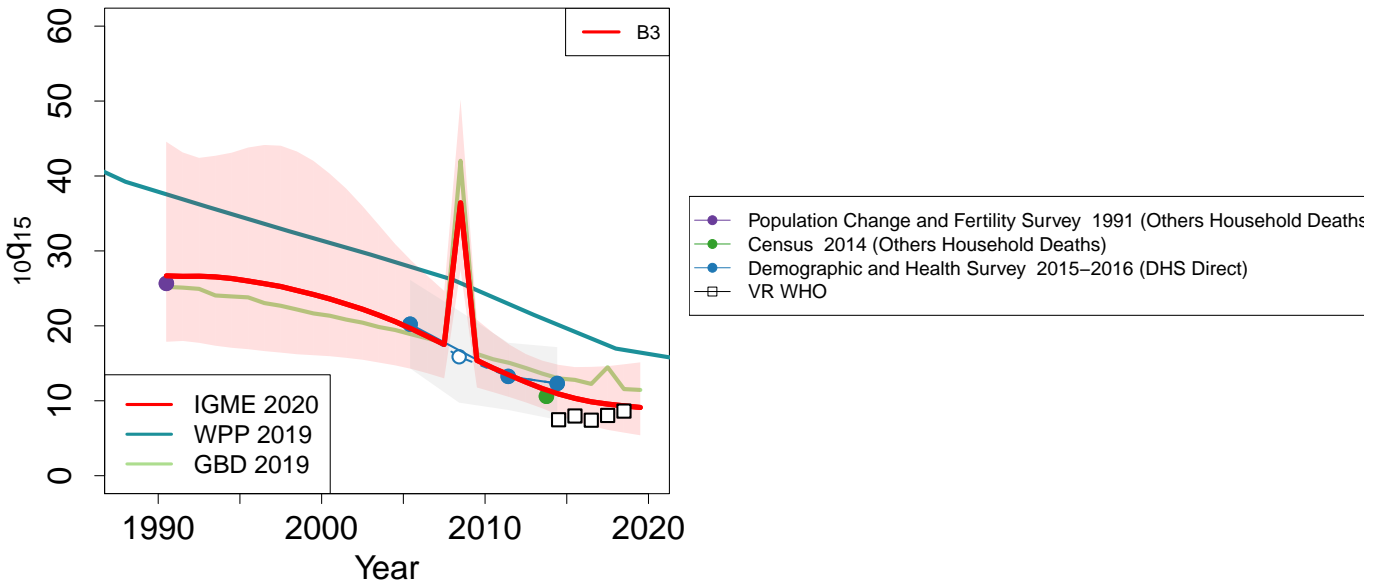

## Namibia

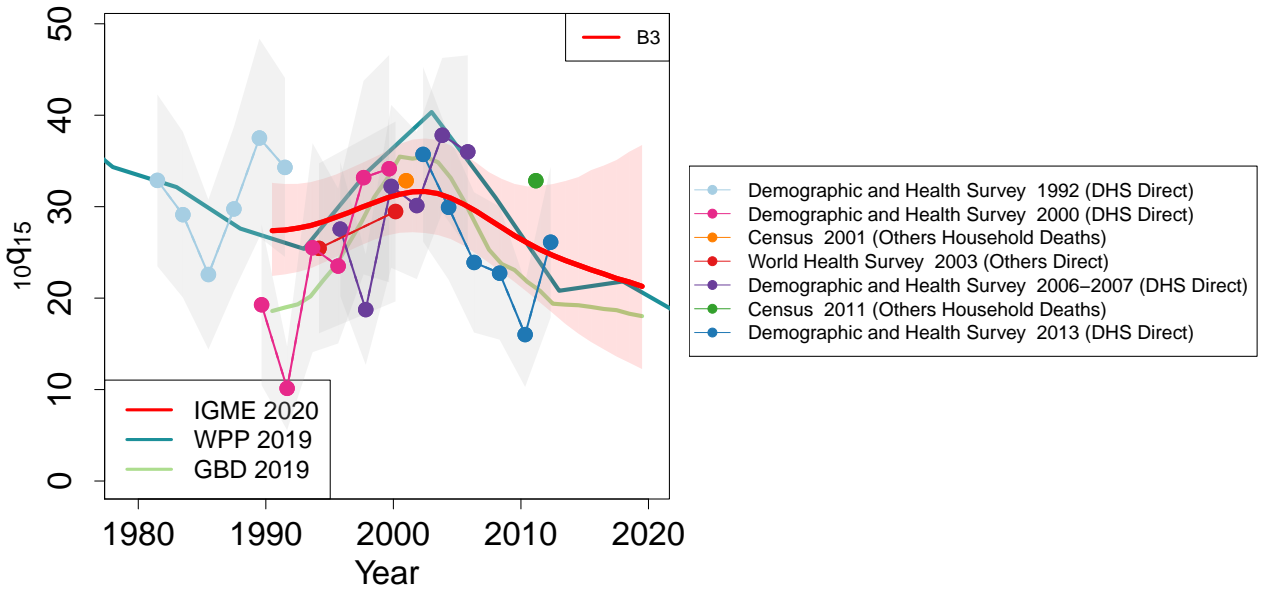

### Nauru

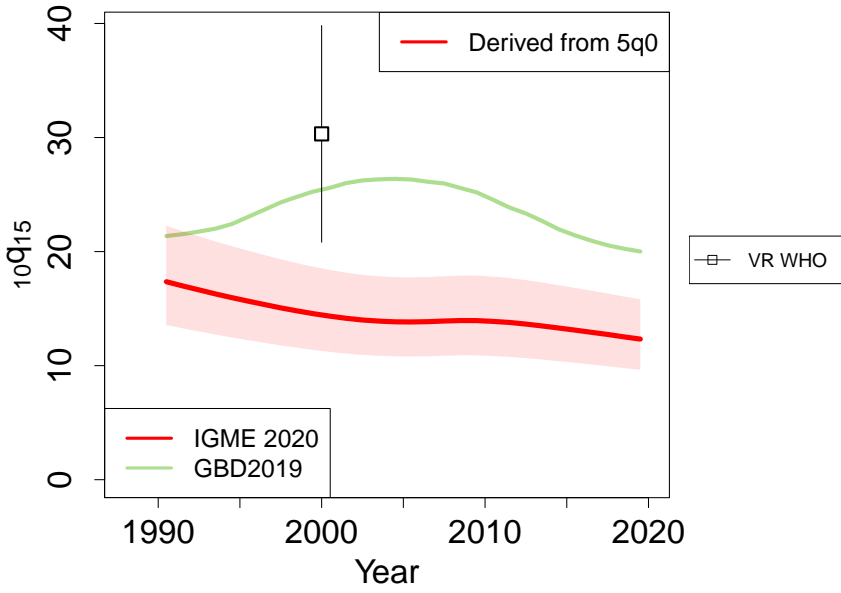

### Nepal

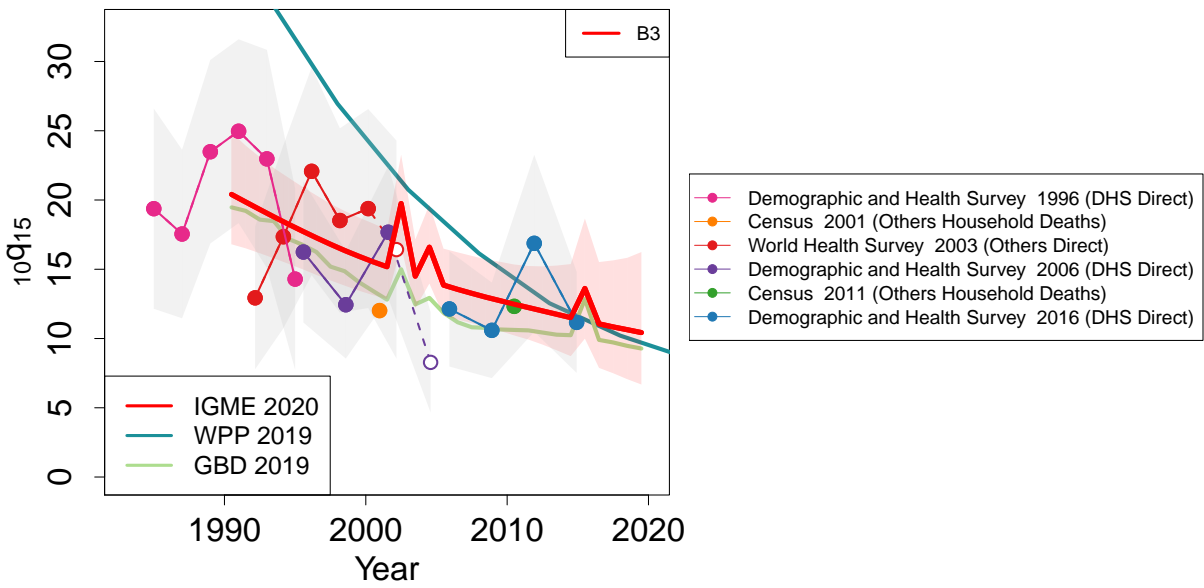

## Netherlands

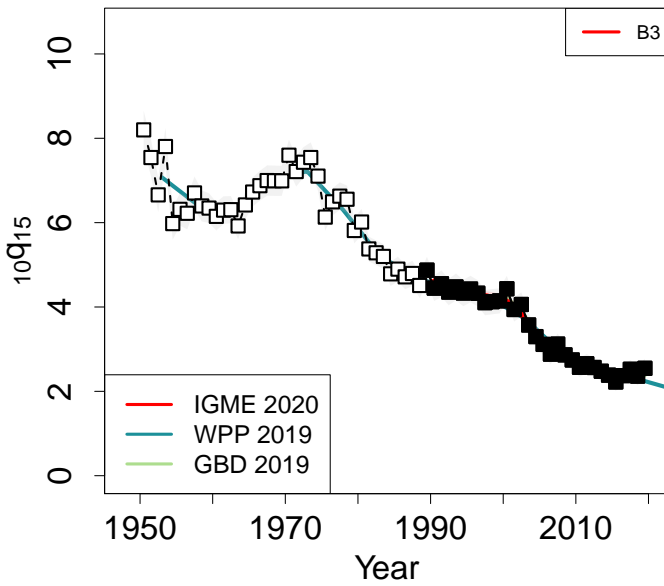

## New Zealand

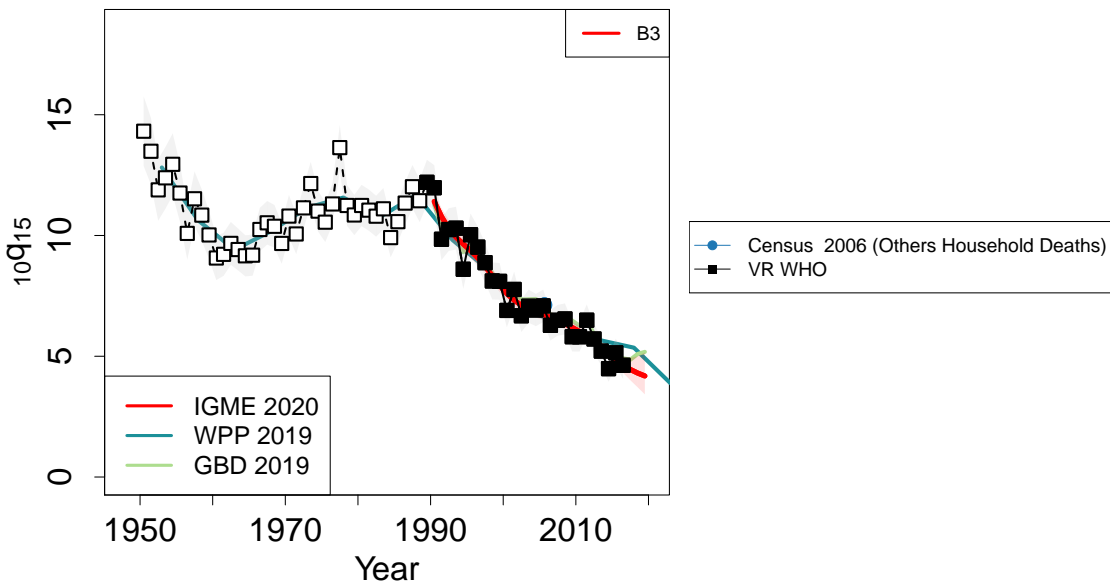

## Nicaragua

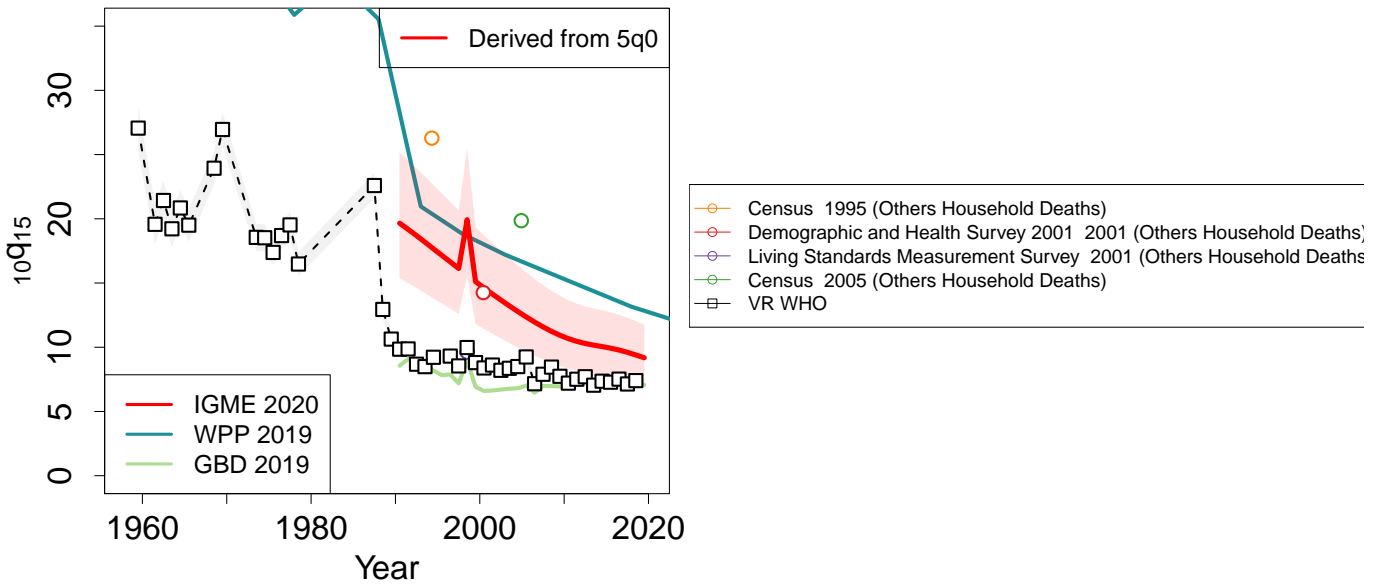

## Niger

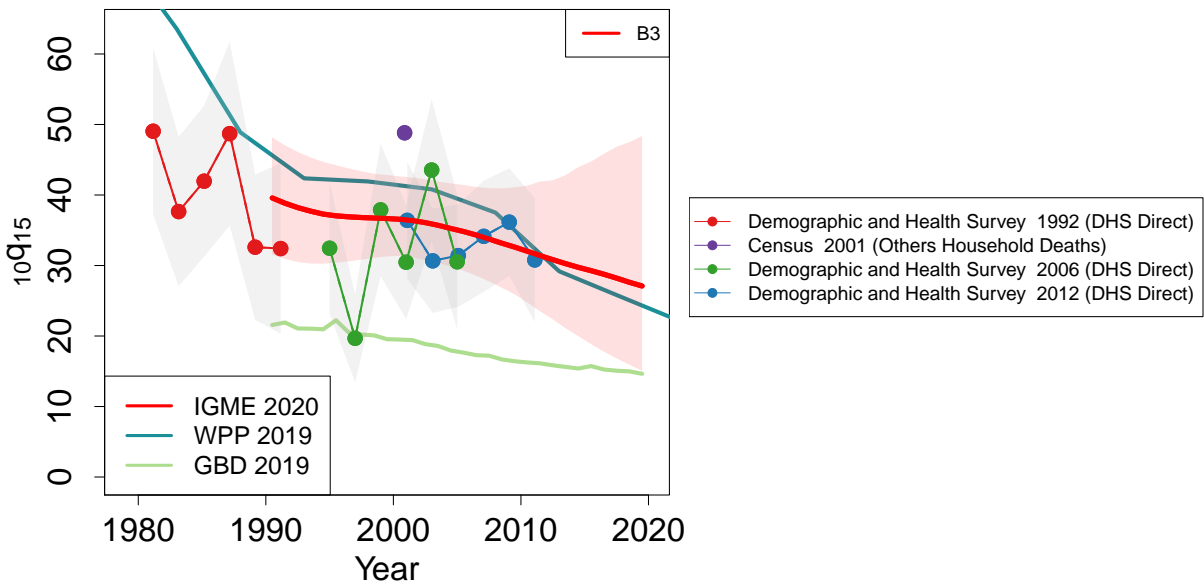

## Nigeria

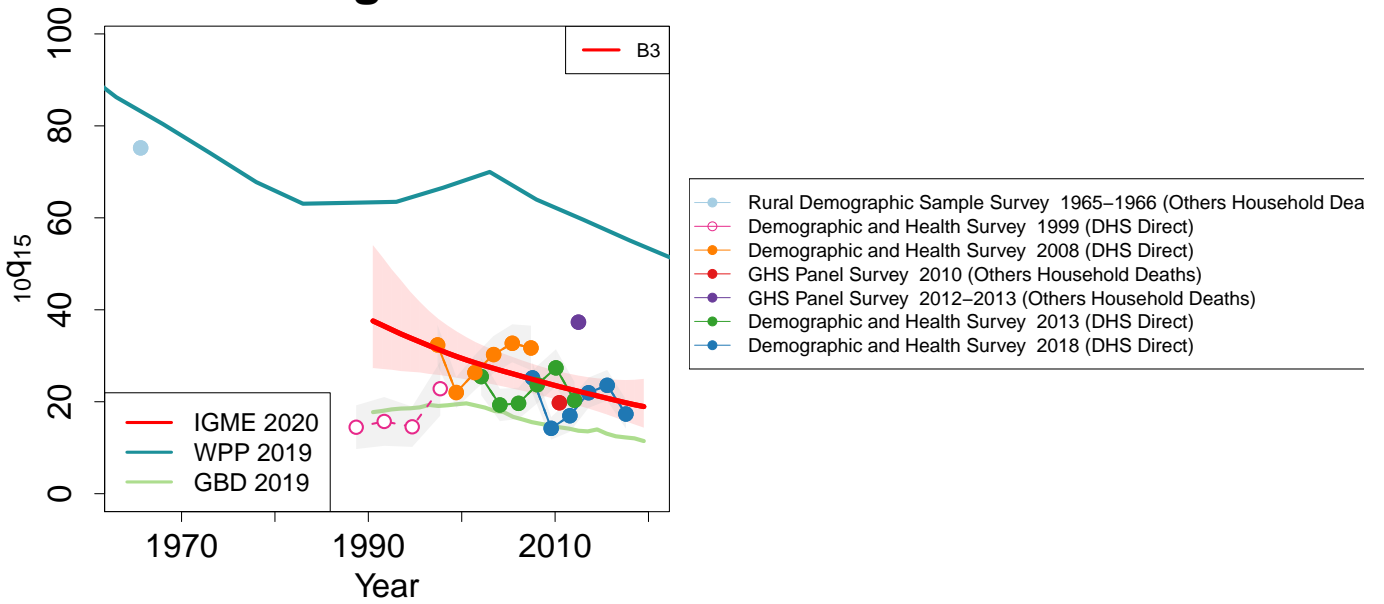

## Niue

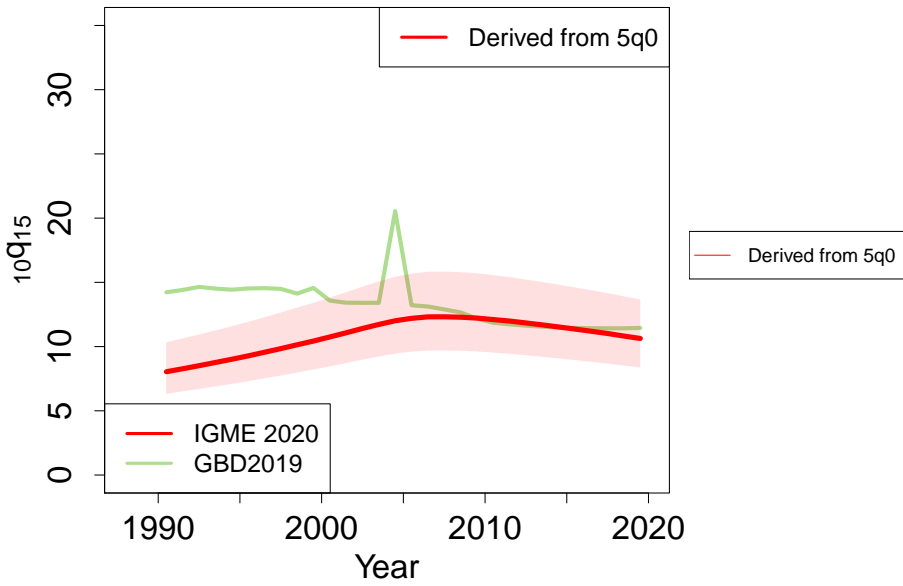



## Norway

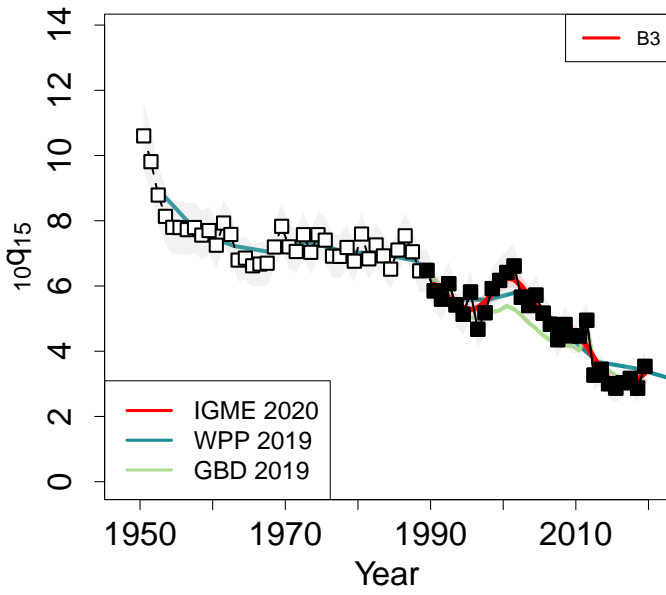

## Oman

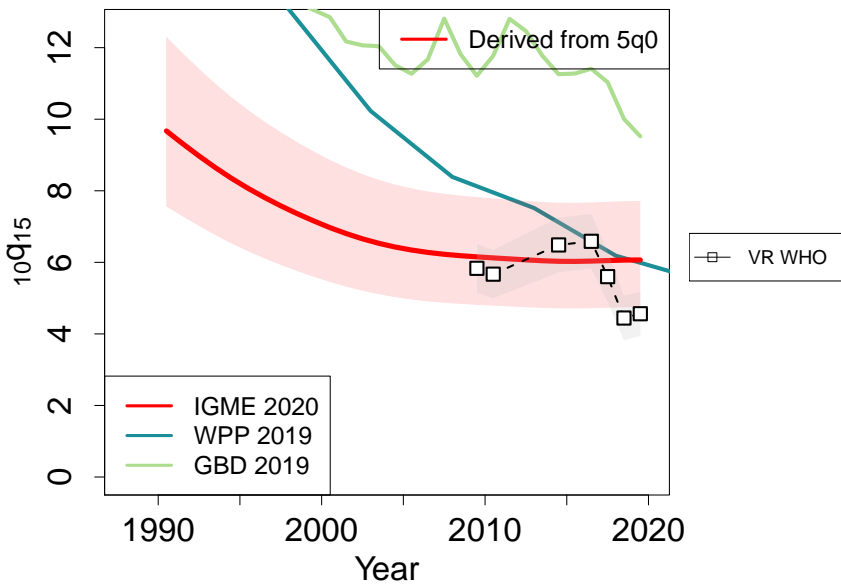

## Pakistan

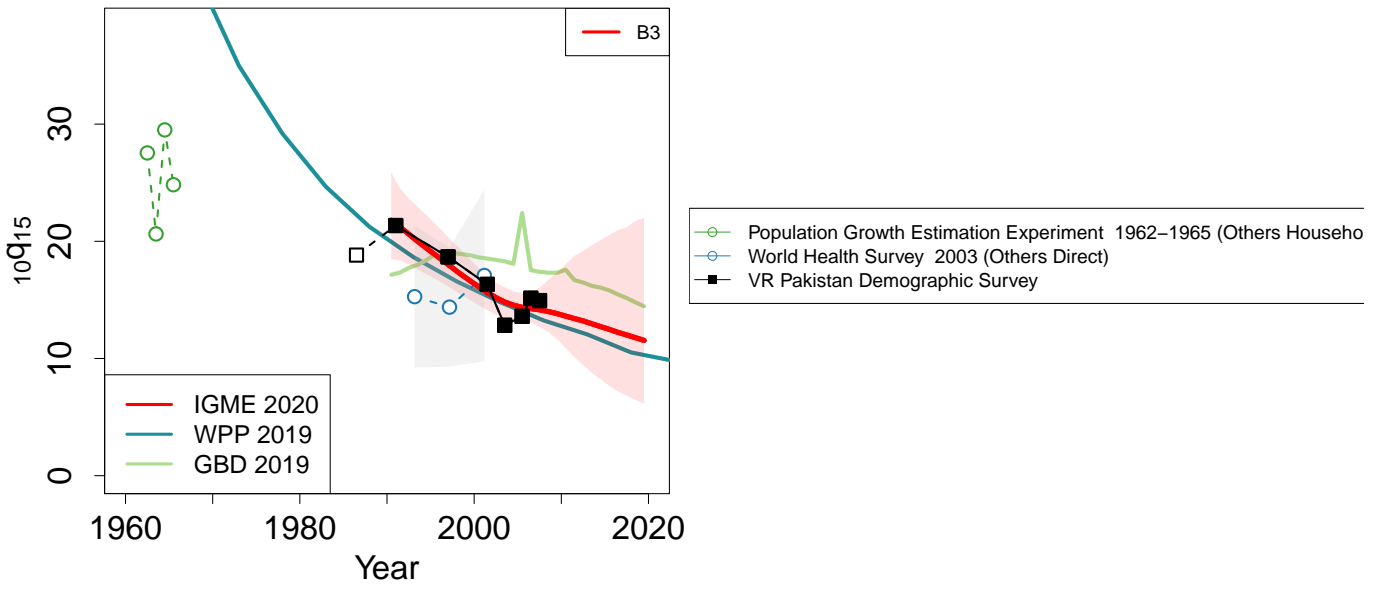

## Palau

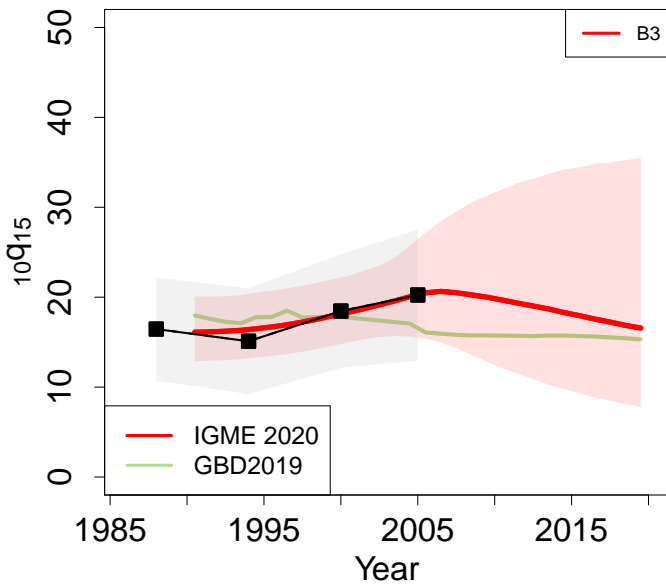

## Panama

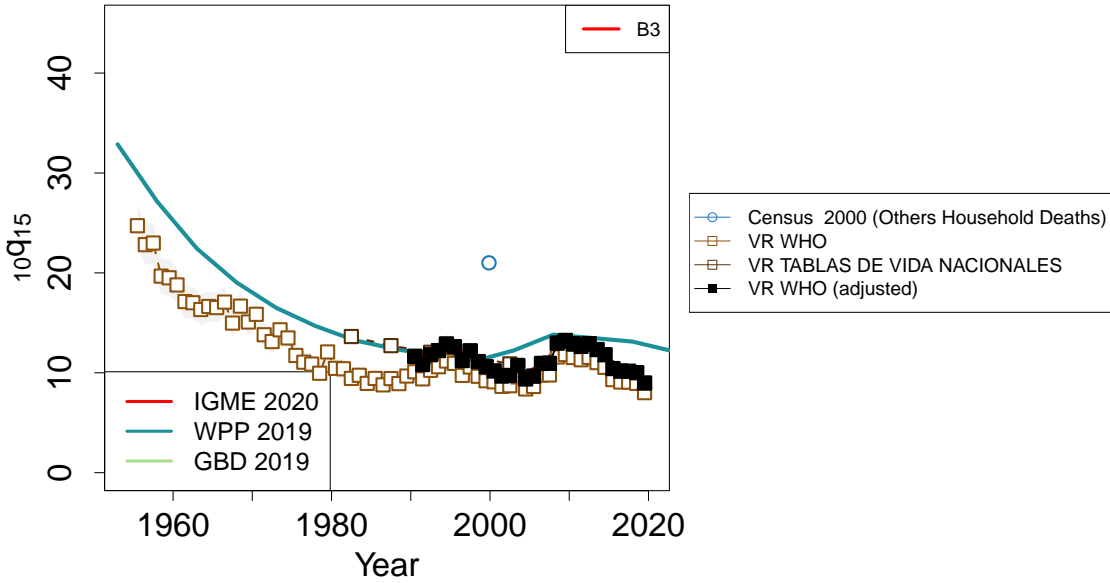

## Papua New Guinea

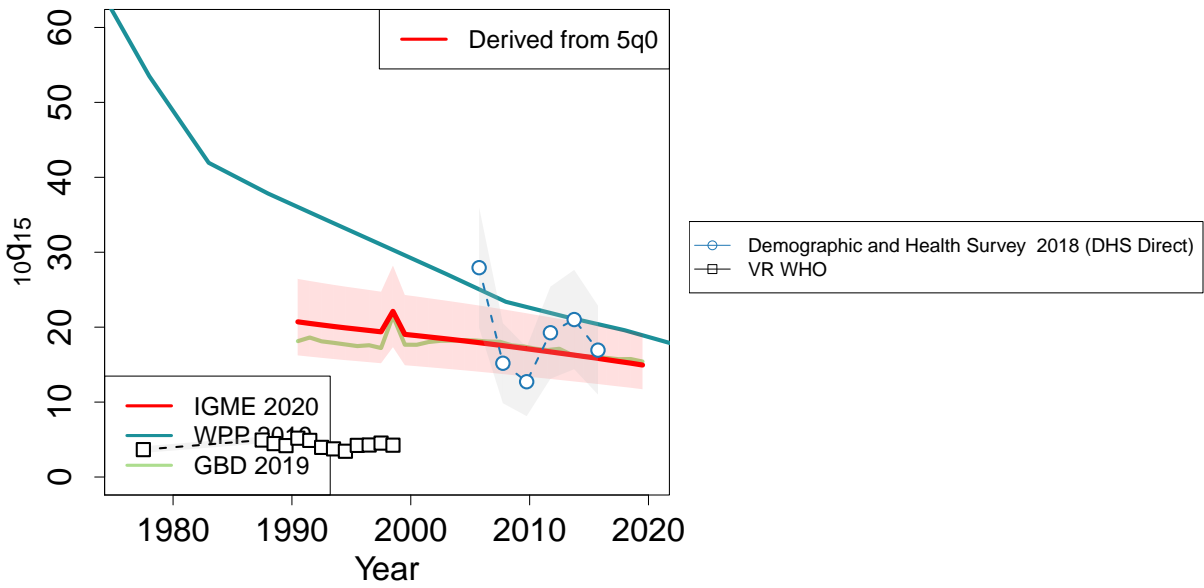

## Paraguay

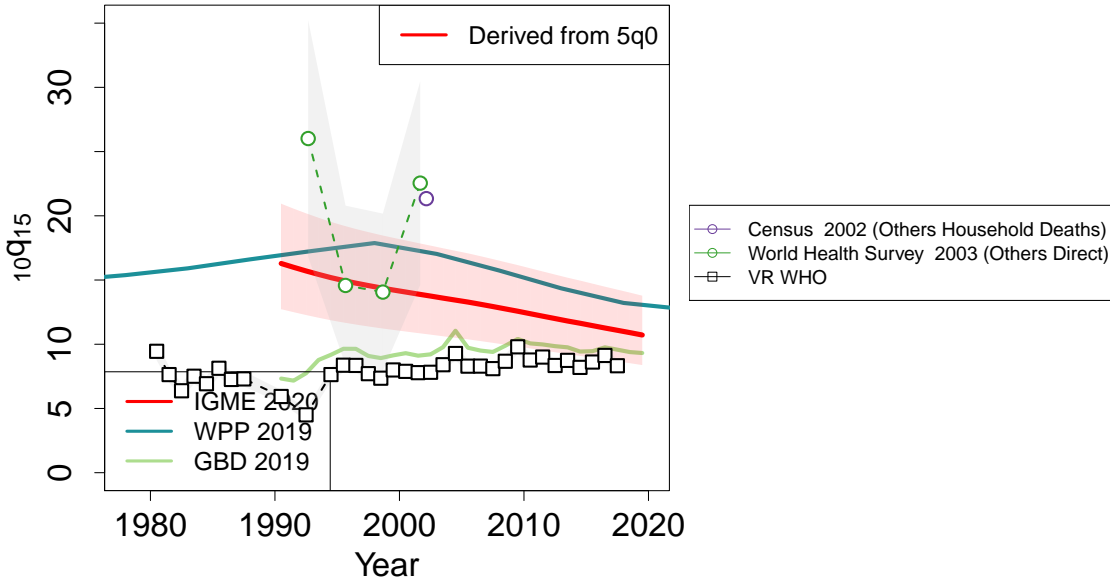

## Peru

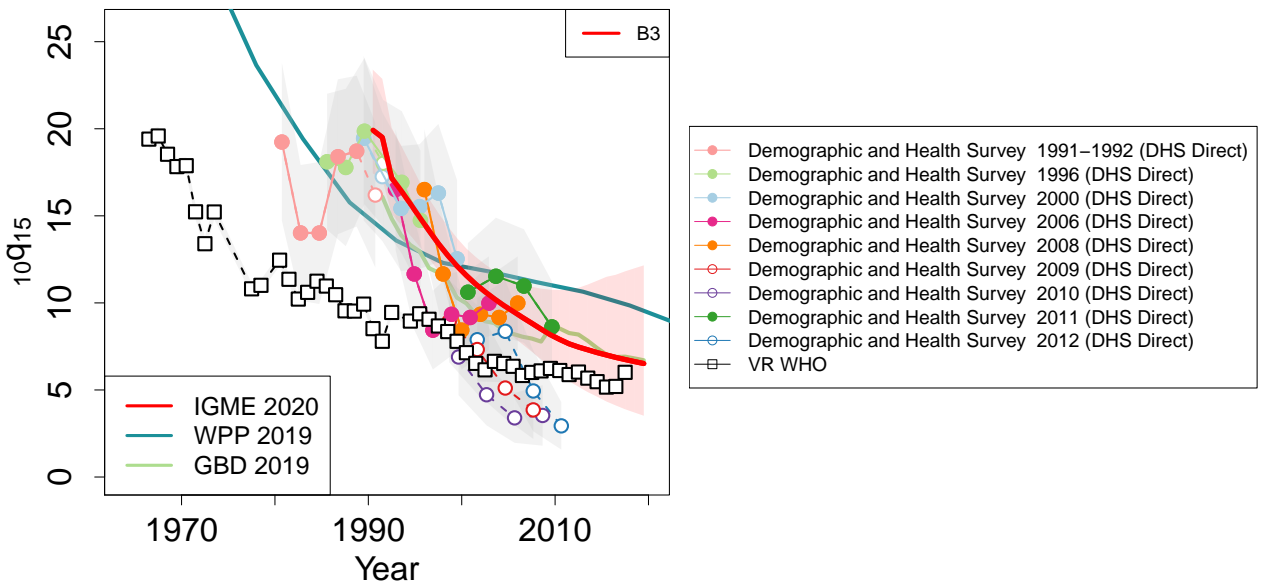

## Philippines

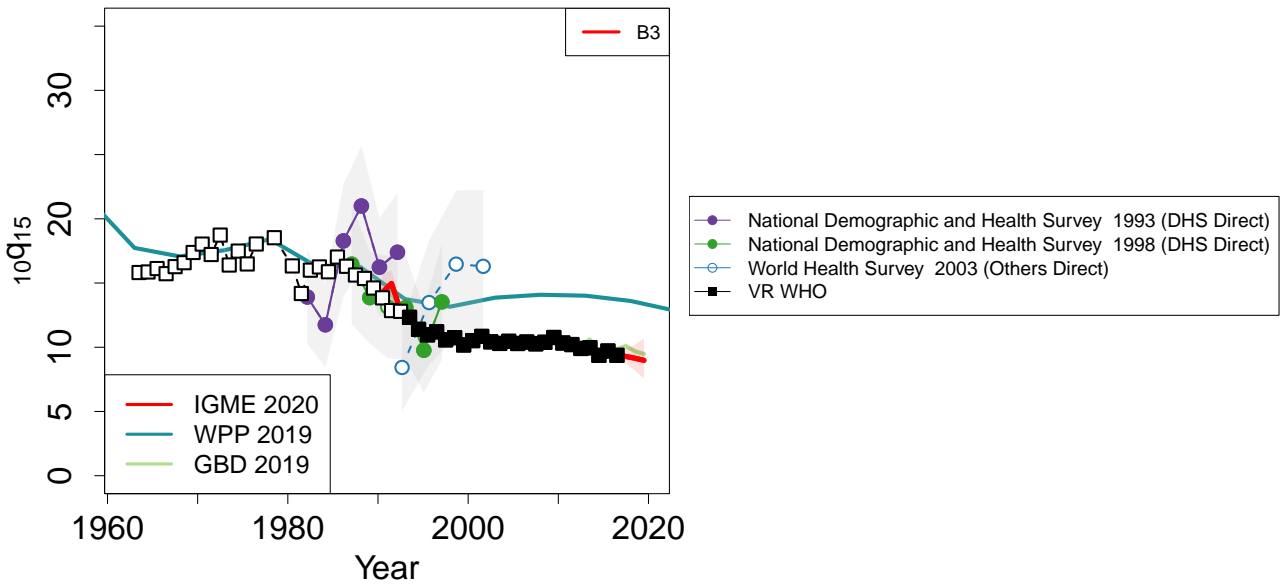

## Poland

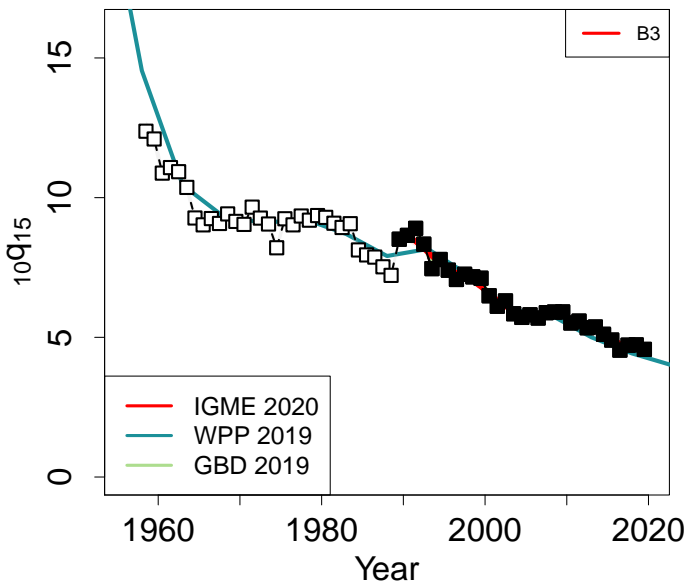

## Portugal

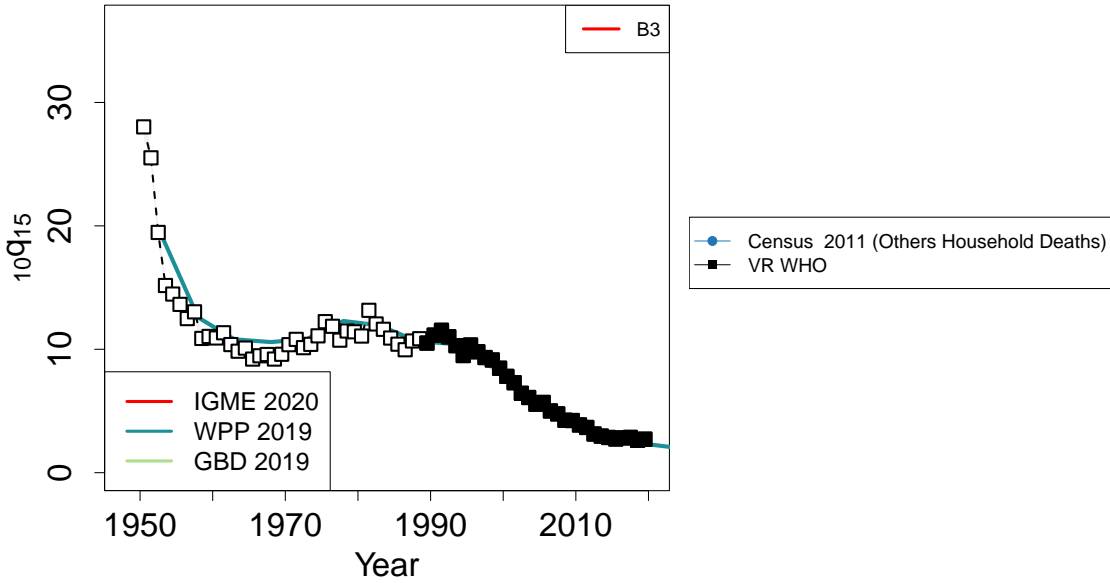

## Qatar

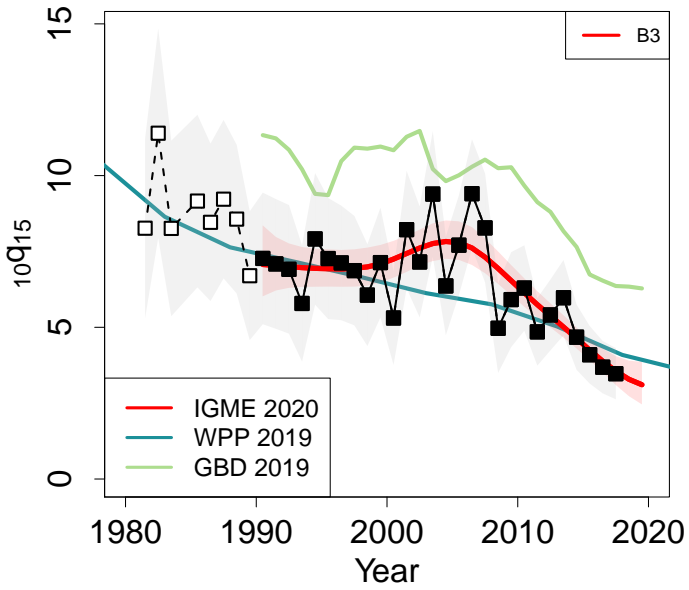

## Romania

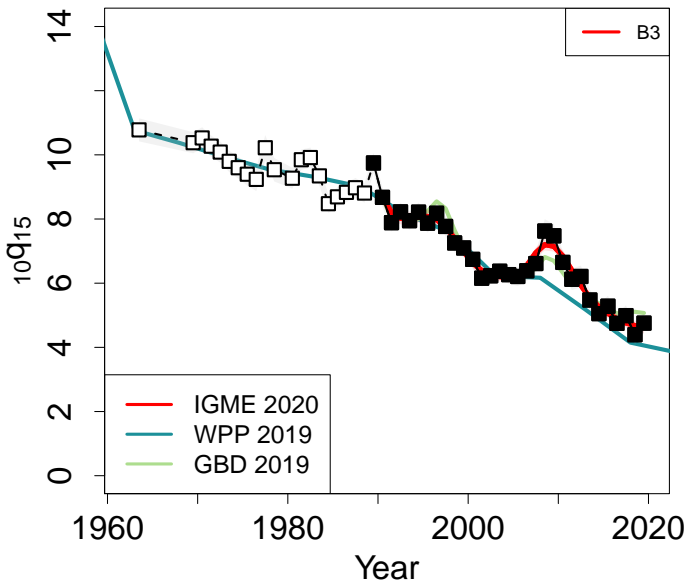

## Russian Federation

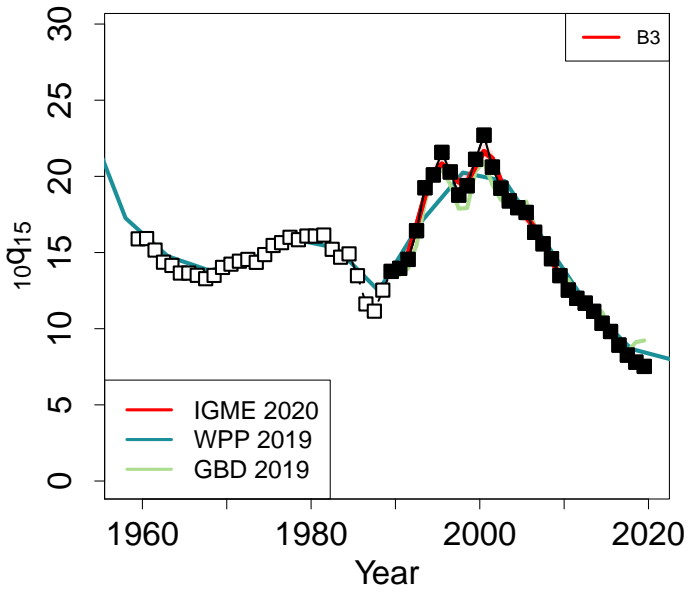

## Rwanda

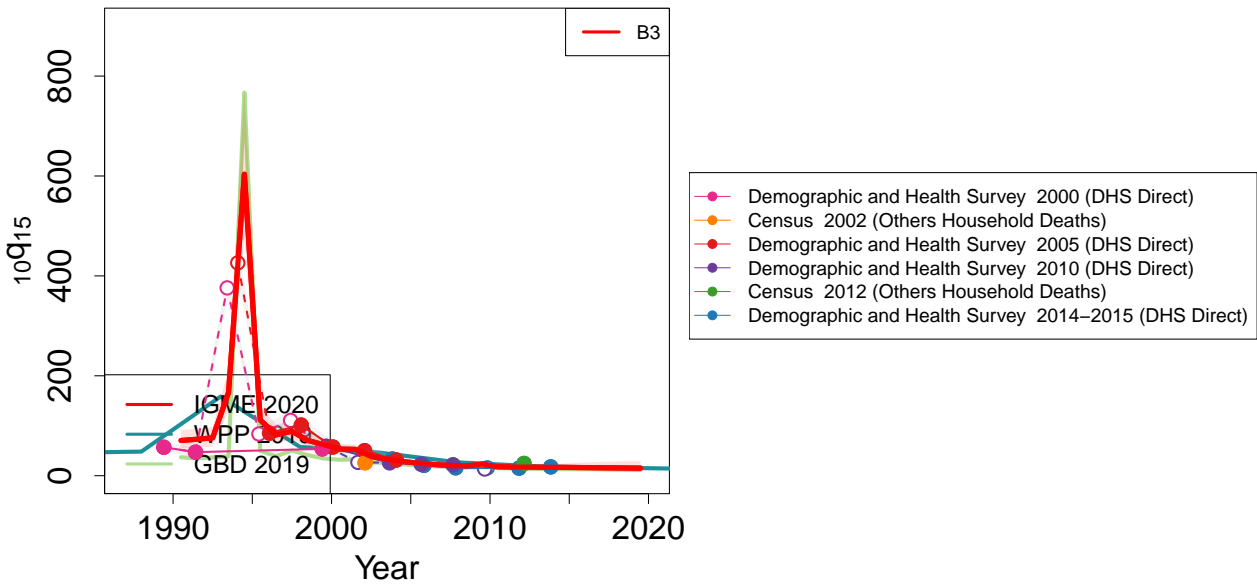

## Saint Kitts & Nevis

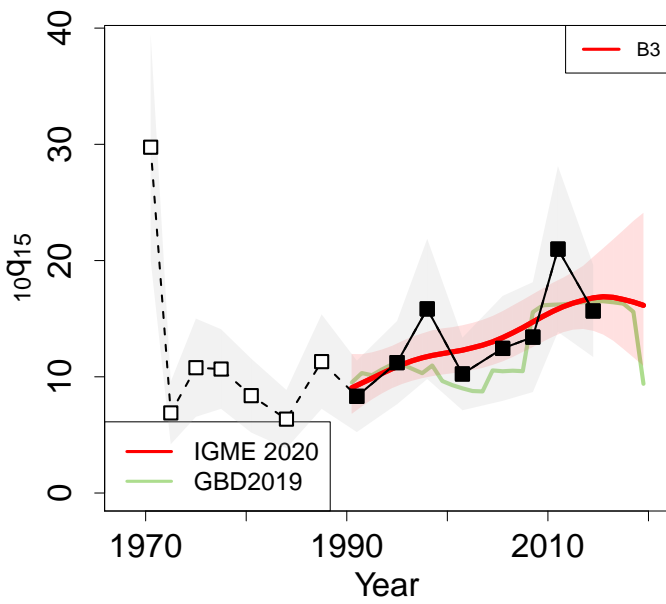



### Saint Lucia

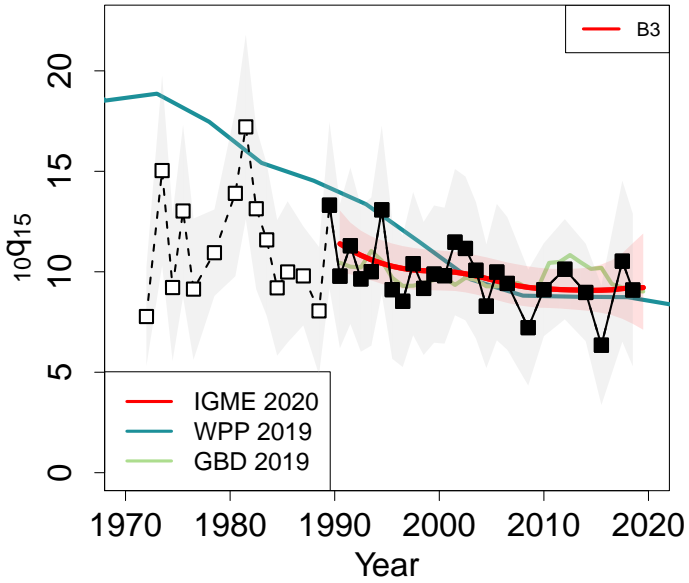

### Samoa

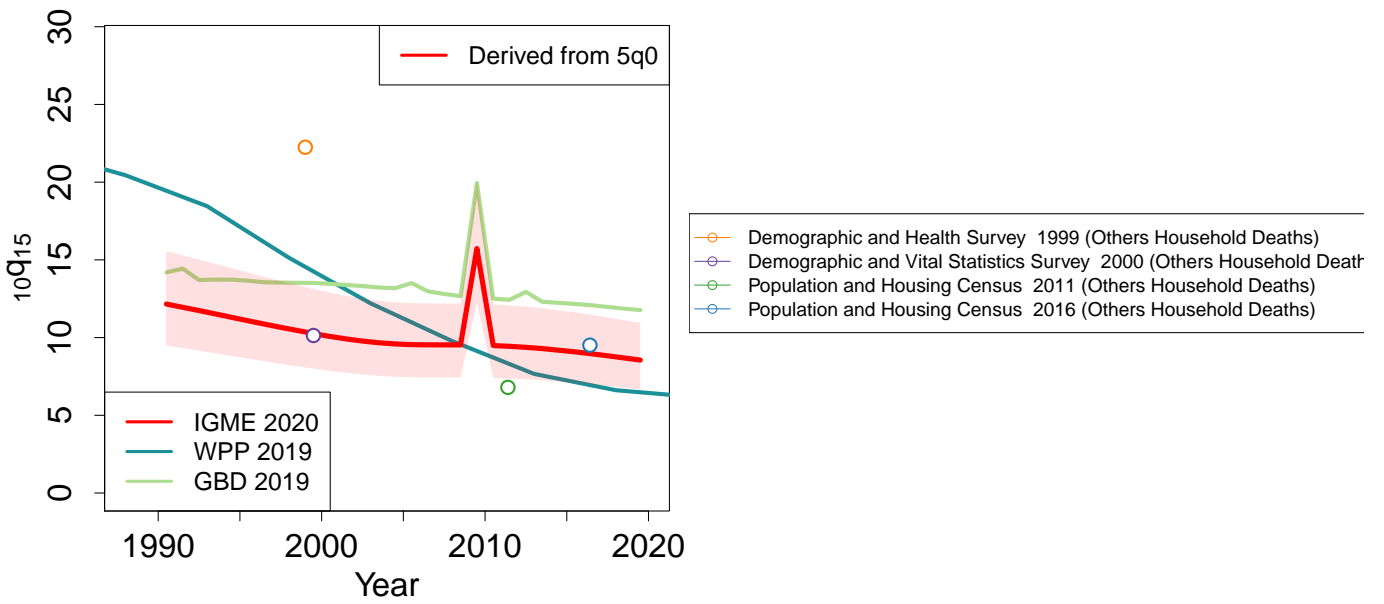

### San Marino

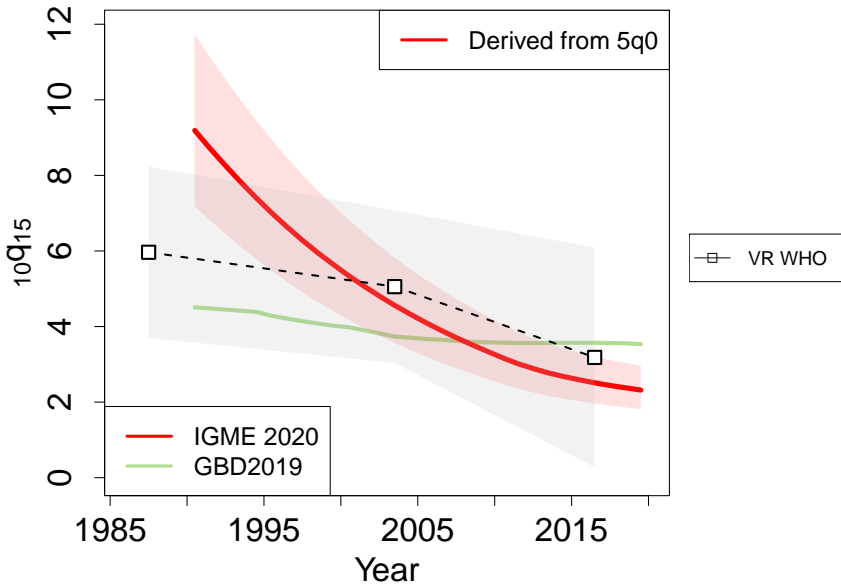

### Sao Tome & Principe

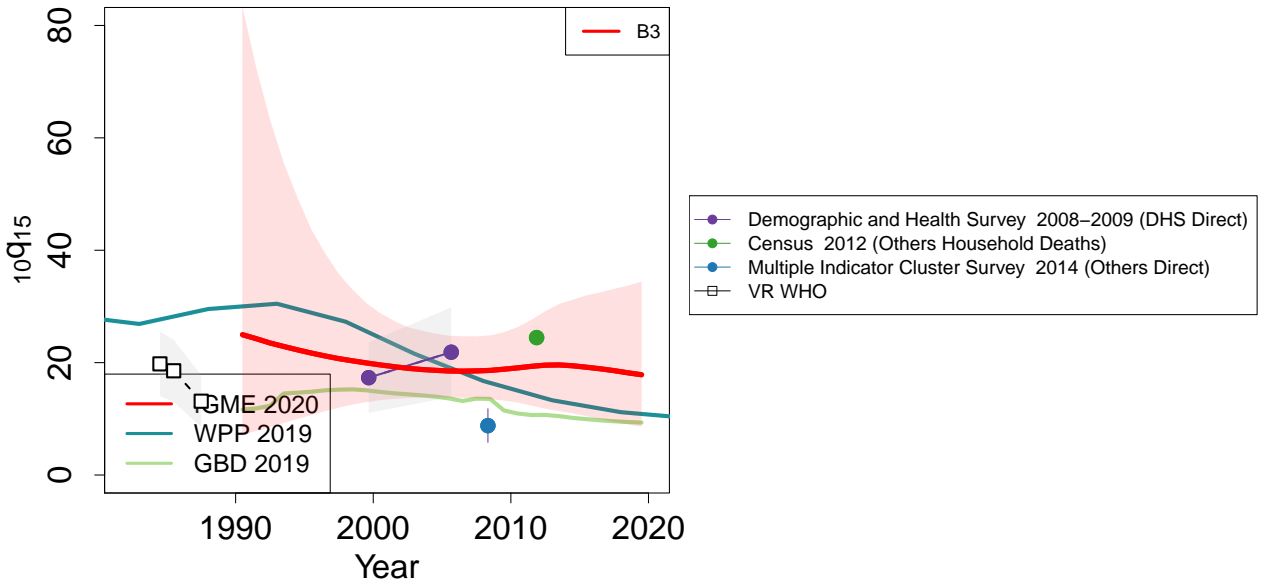

## Saudi Arabia

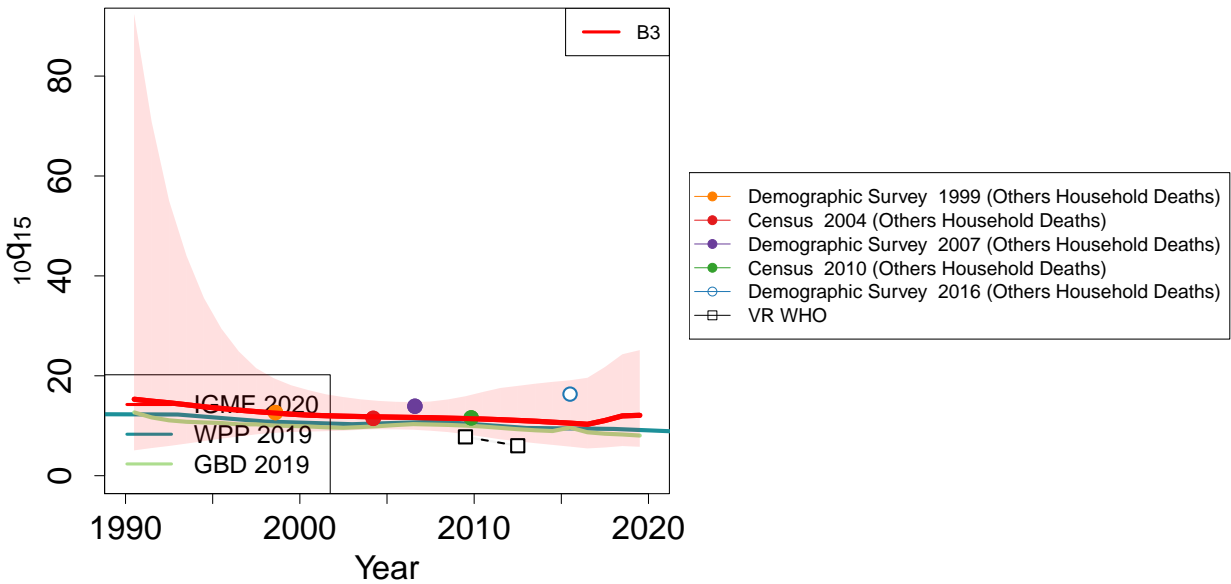

## Senegal

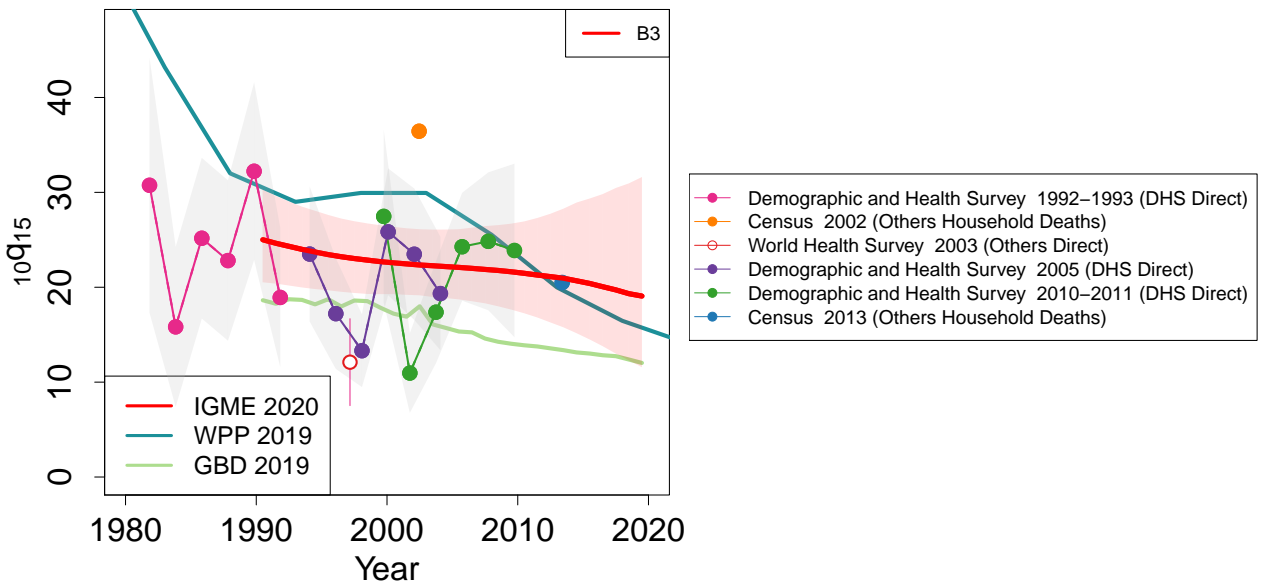

### Serbia

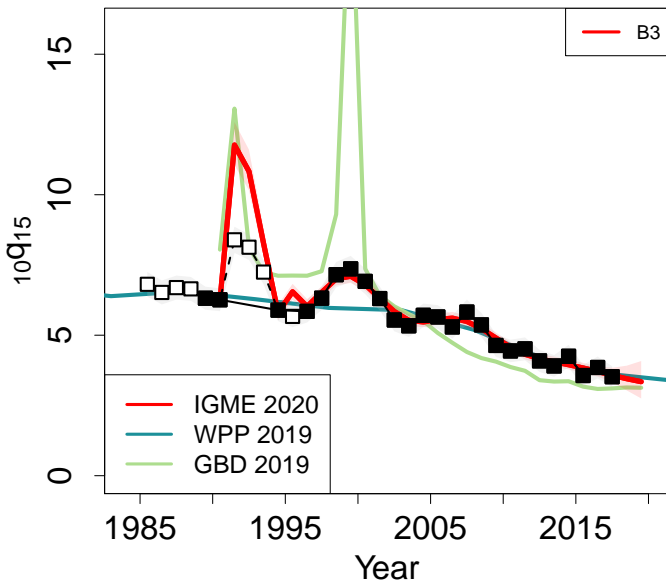

### Seychelles

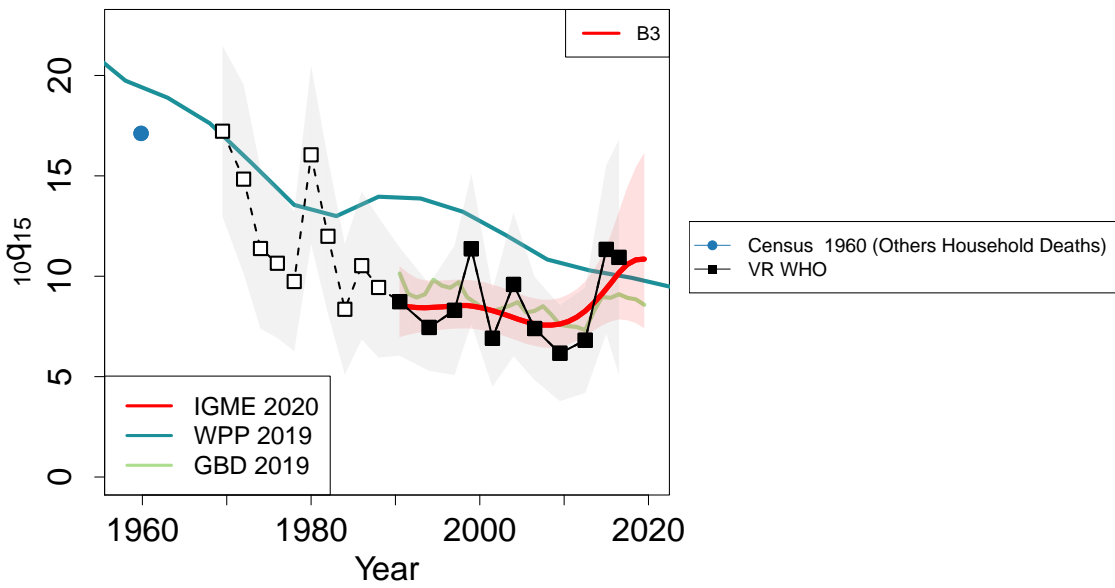

## Sierra Leone

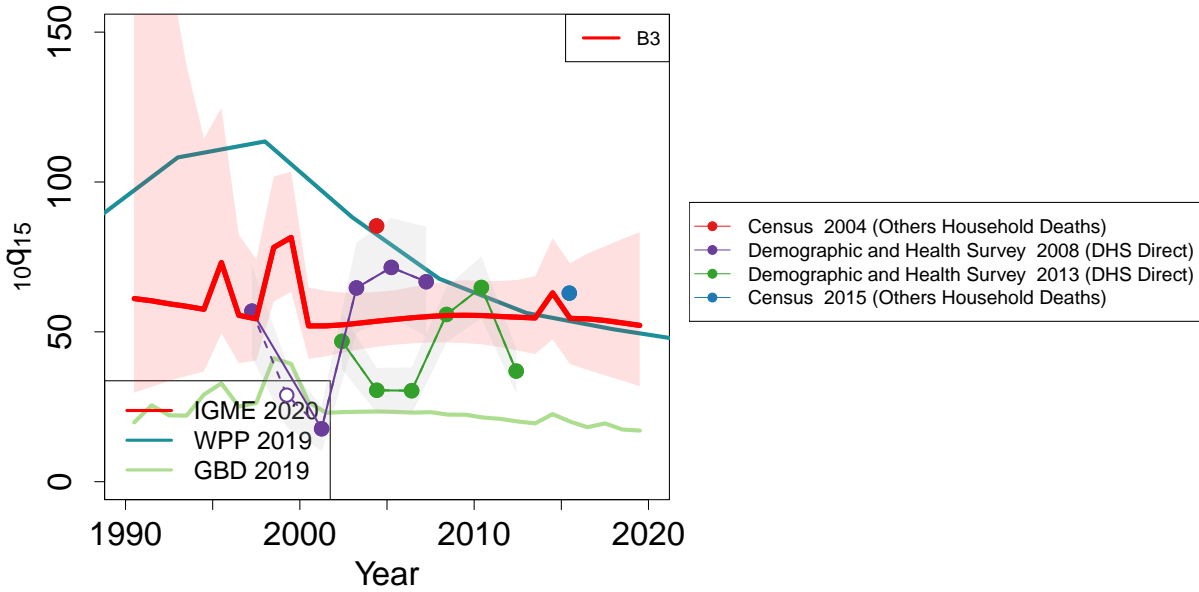

## Singapore

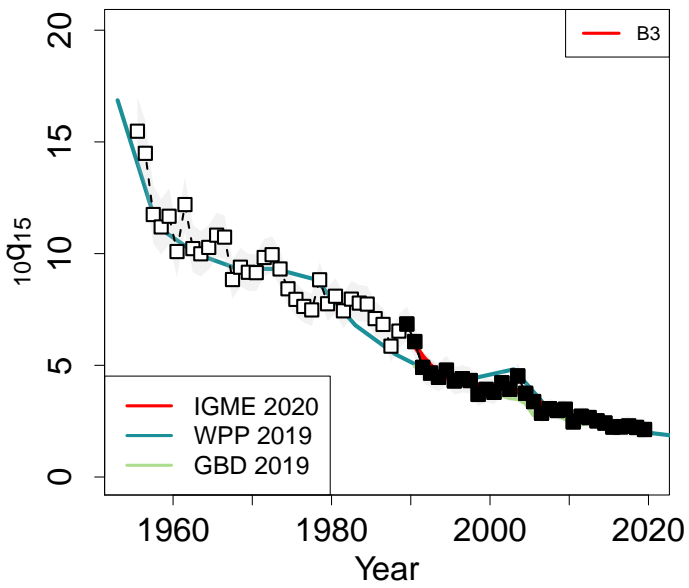

## Slovakia

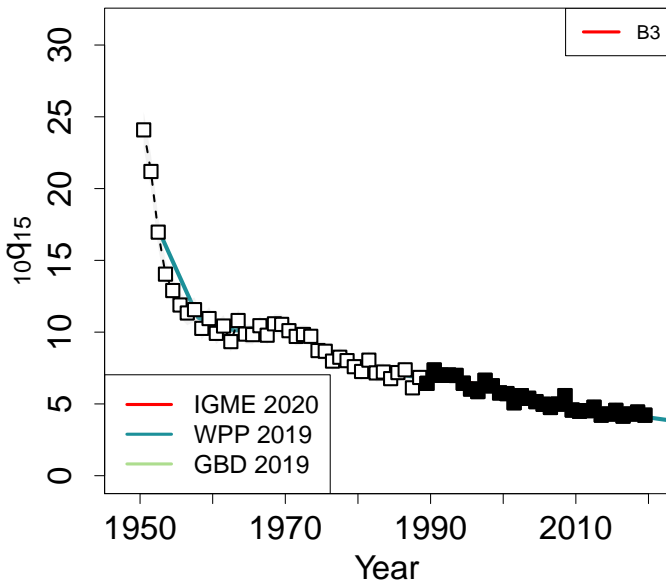

## Slovenia

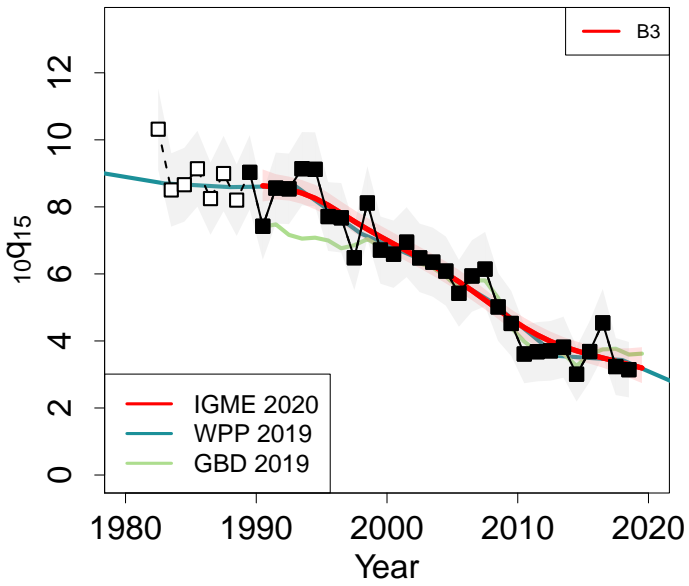

### Solomon Islands

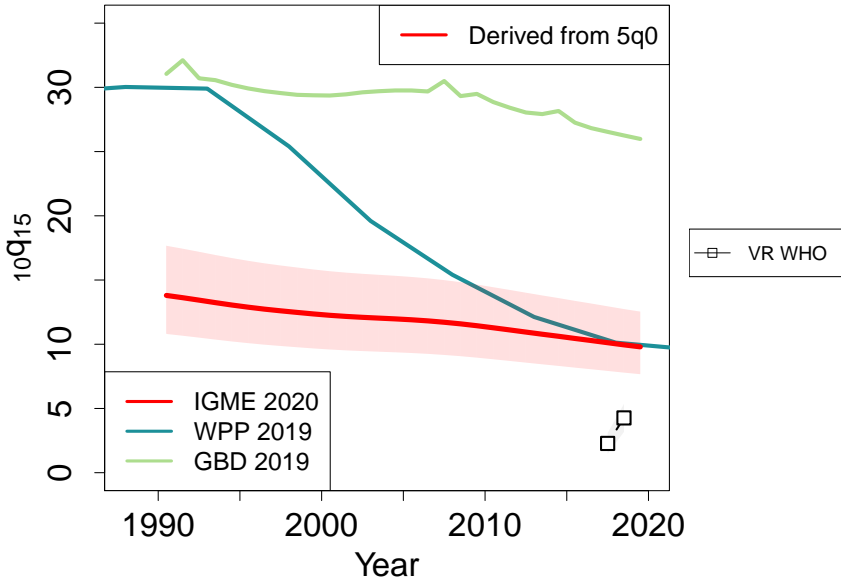

### Somalia

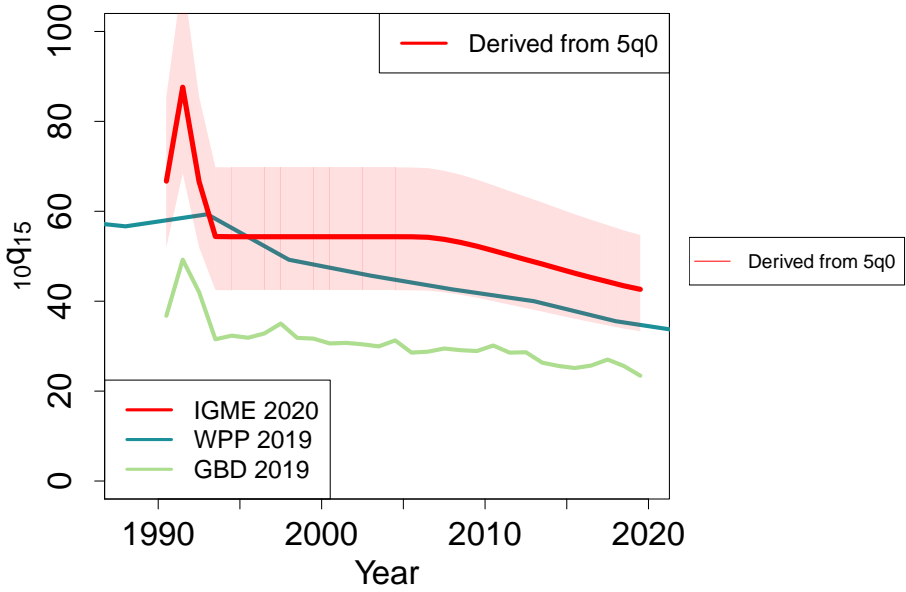

## South Africa

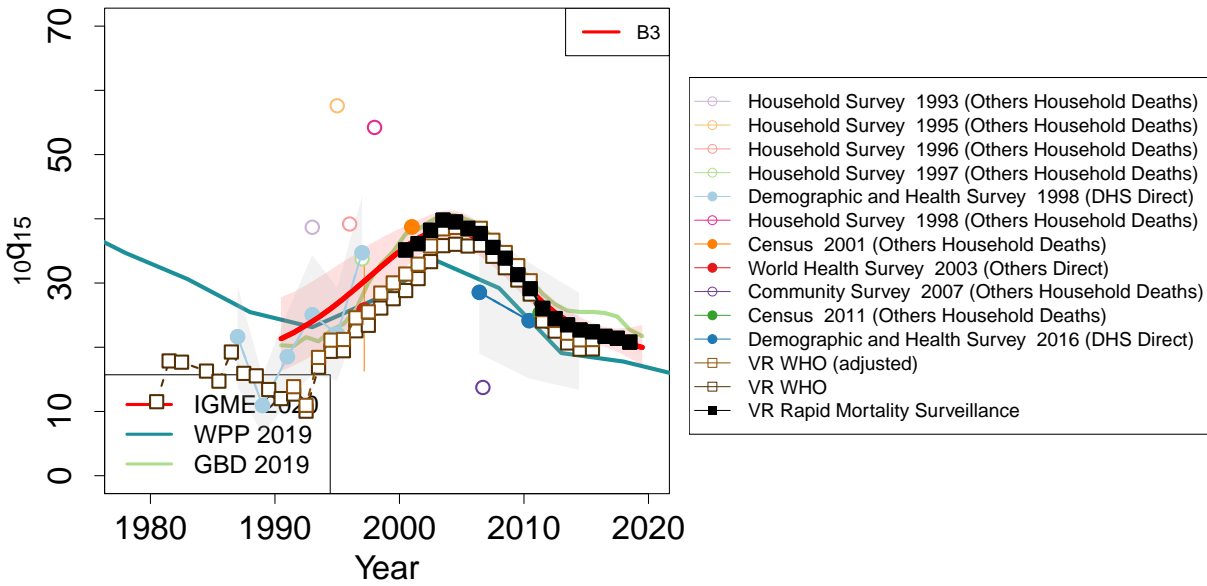

## South Sudan

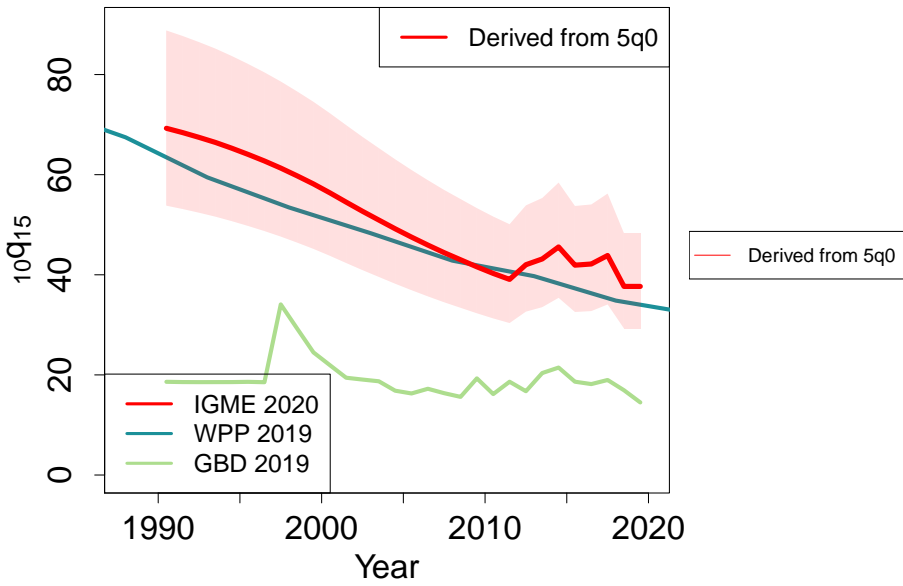



## Spain

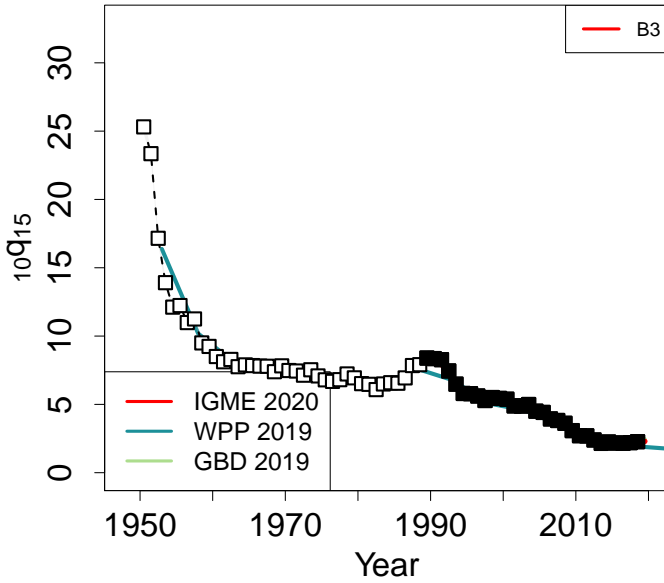

## Sri Lanka

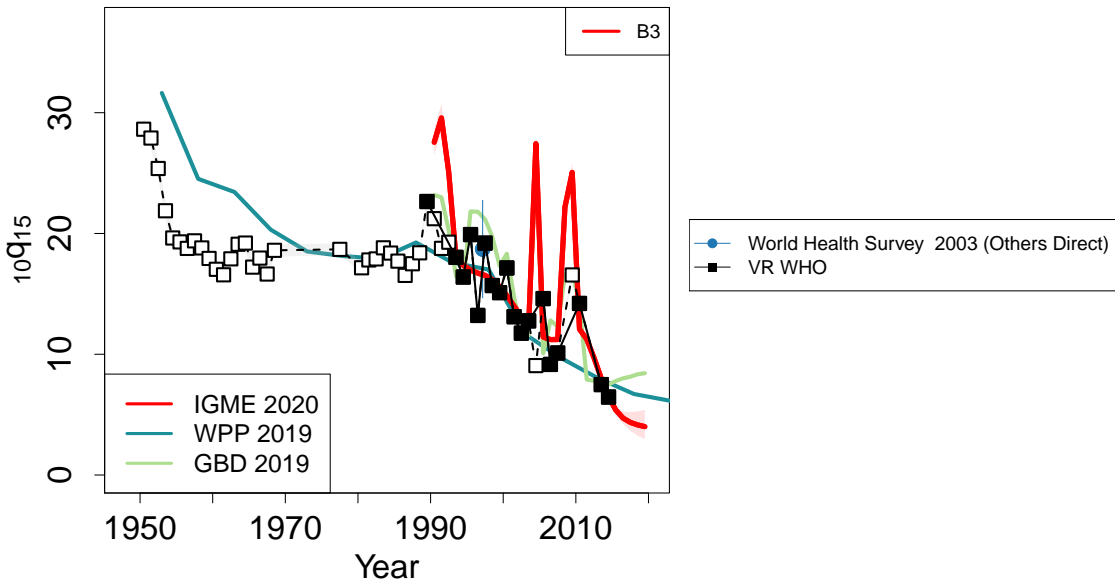

## St Vincent & the Grenadine

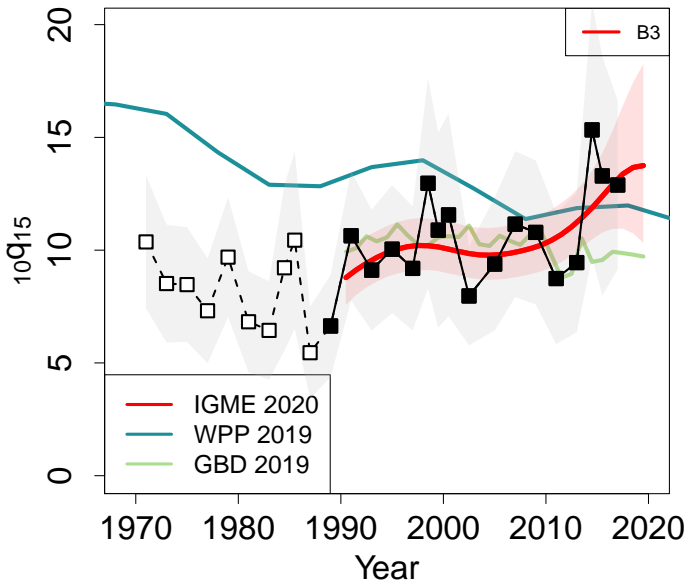

## State of Palestine

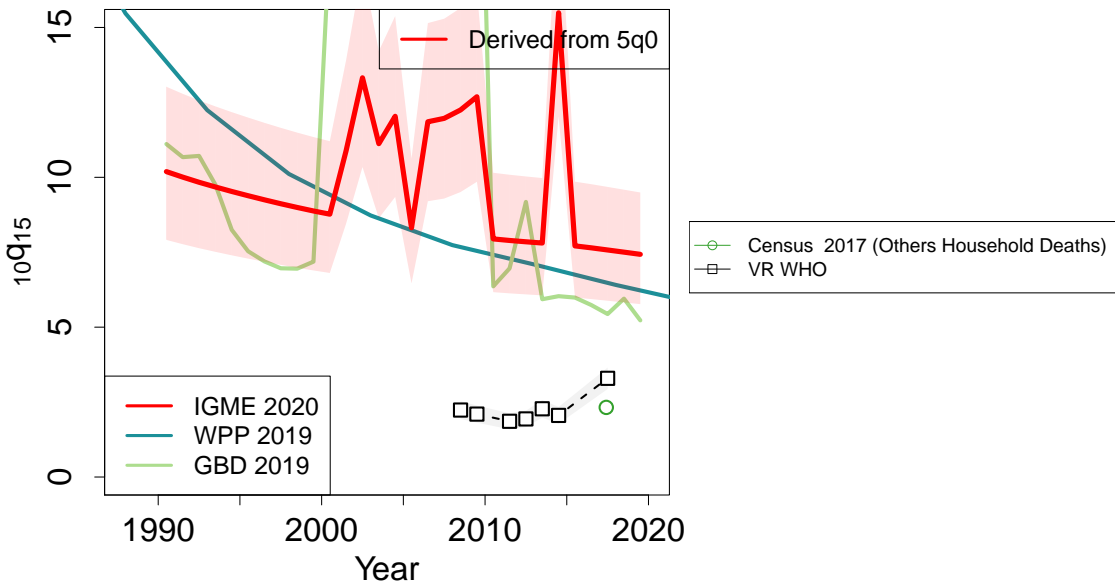

## Sudan

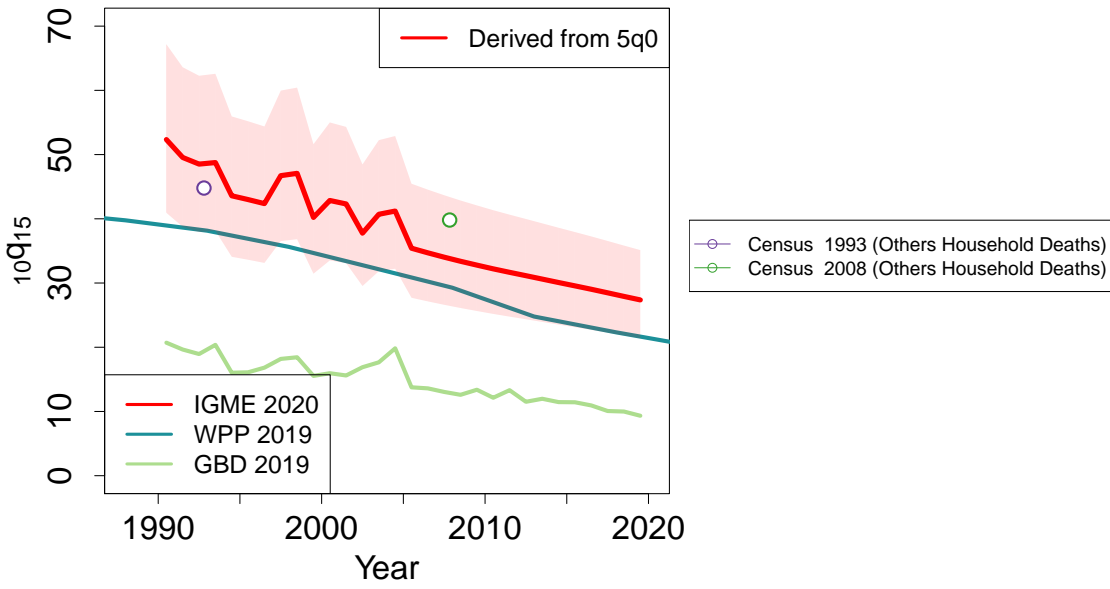

## Suriname

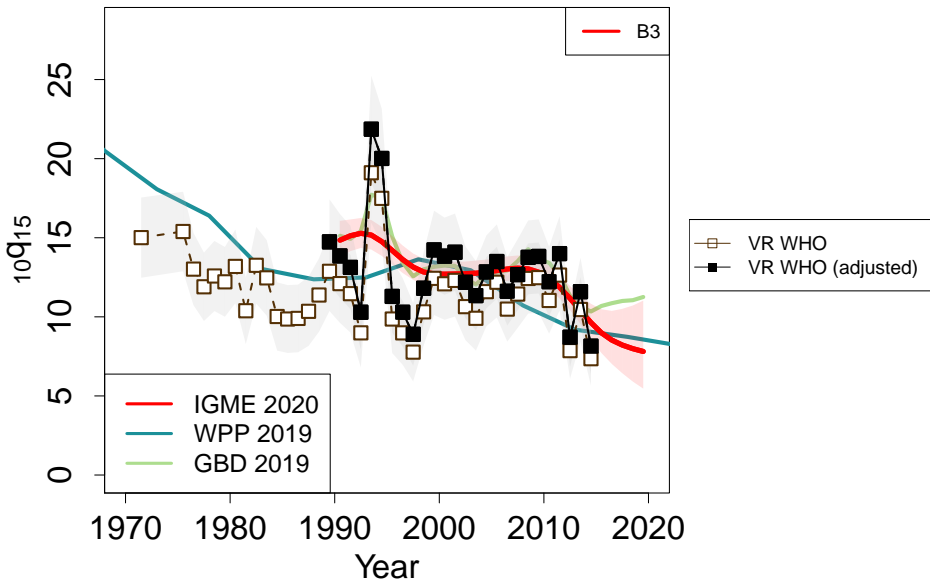

## Sweden

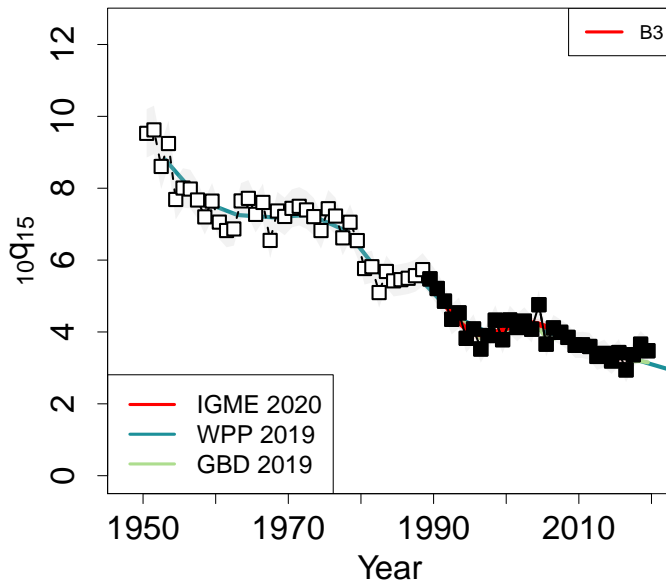

## Switzerland

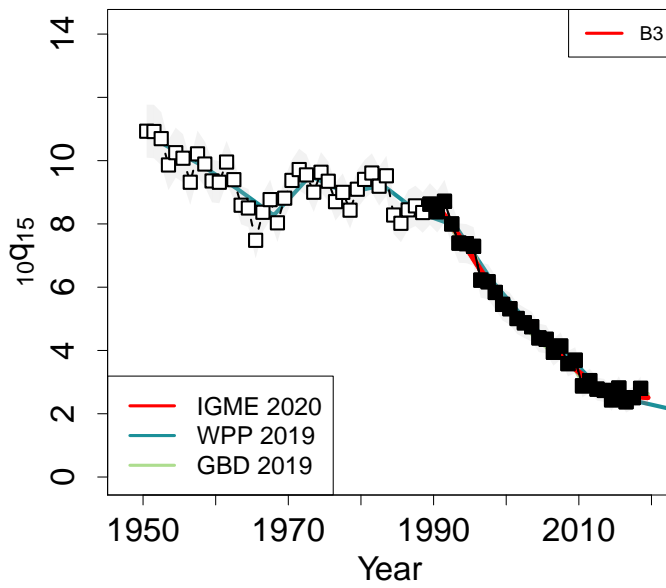

## Syria

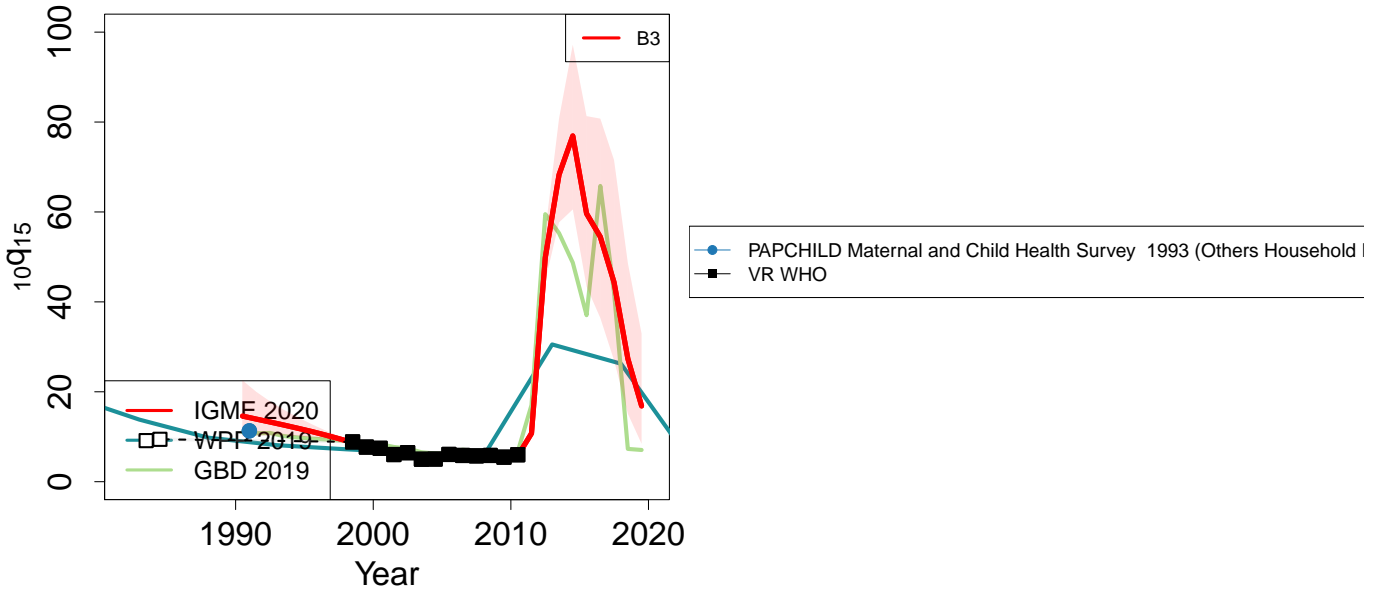

## Tajikistan

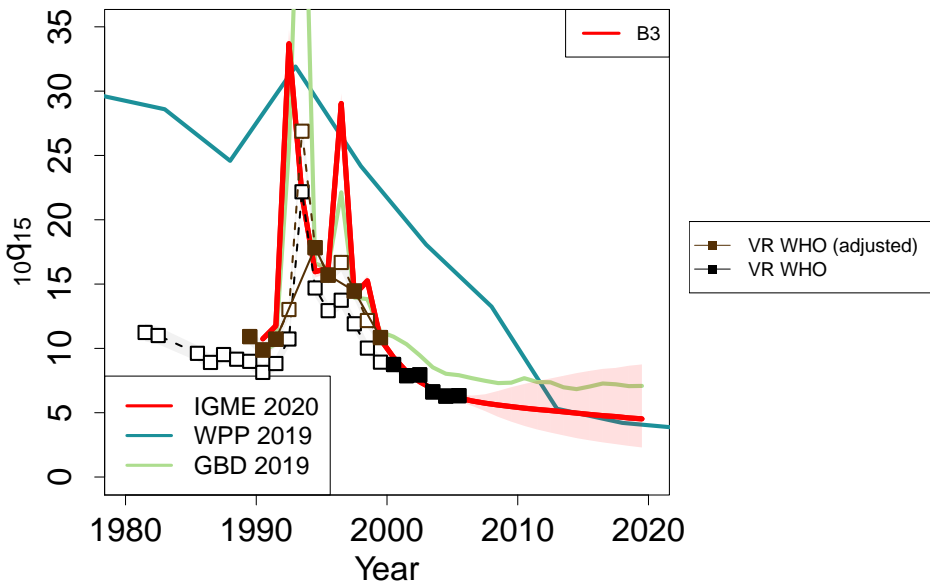

## Tanzania

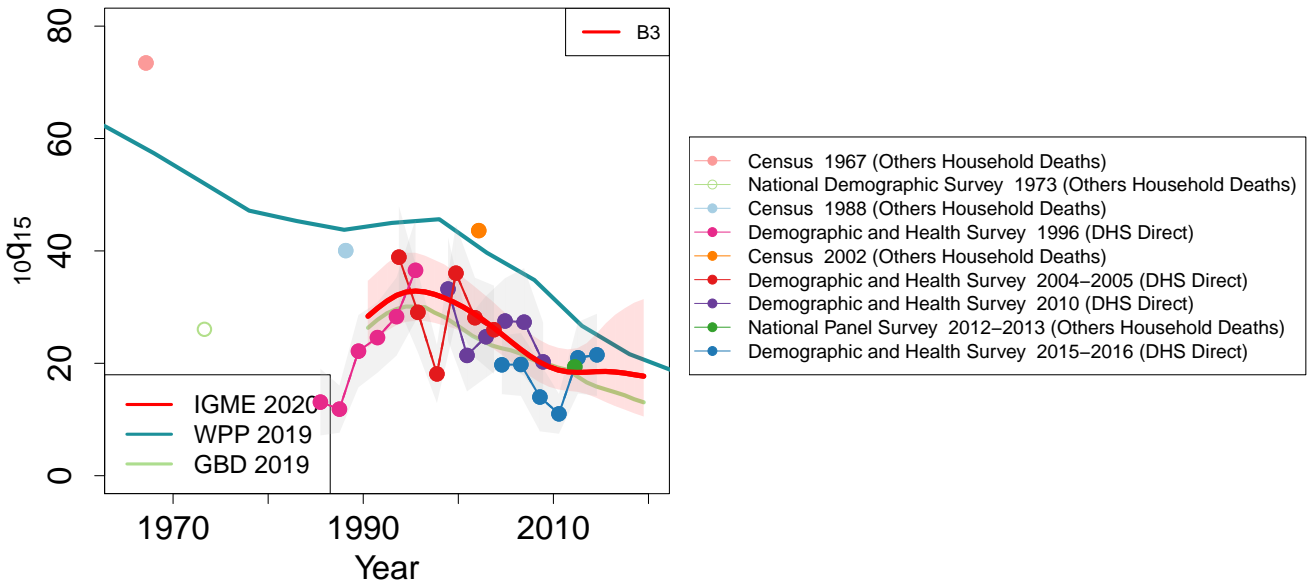

## Thailand

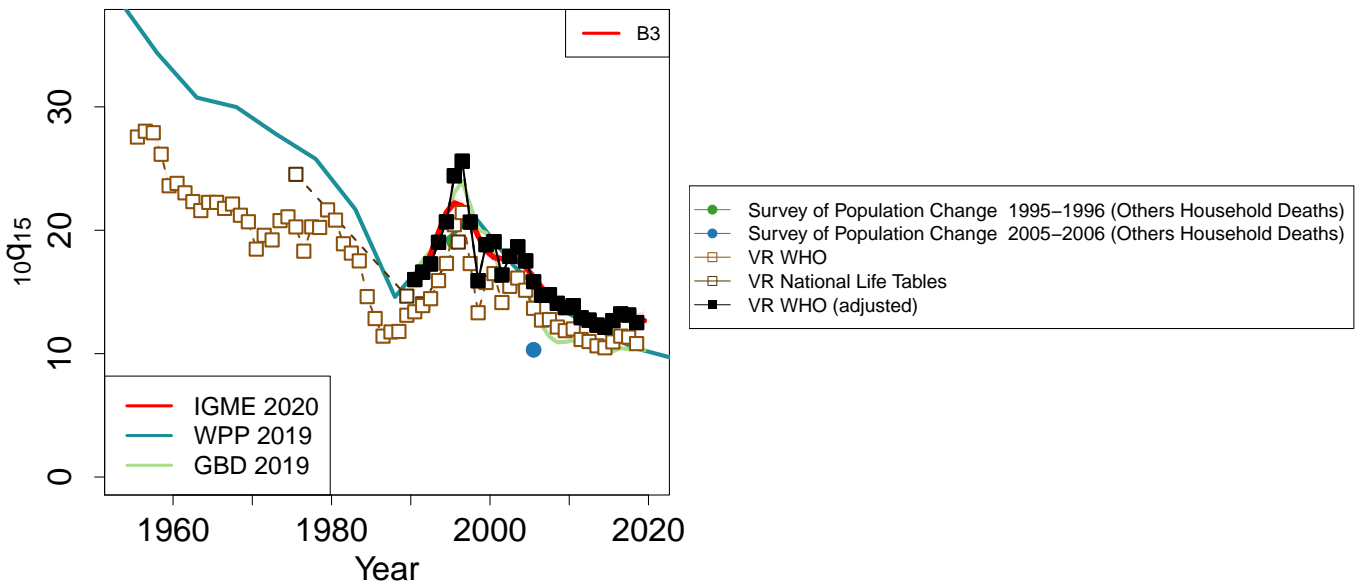

## Timor Leste

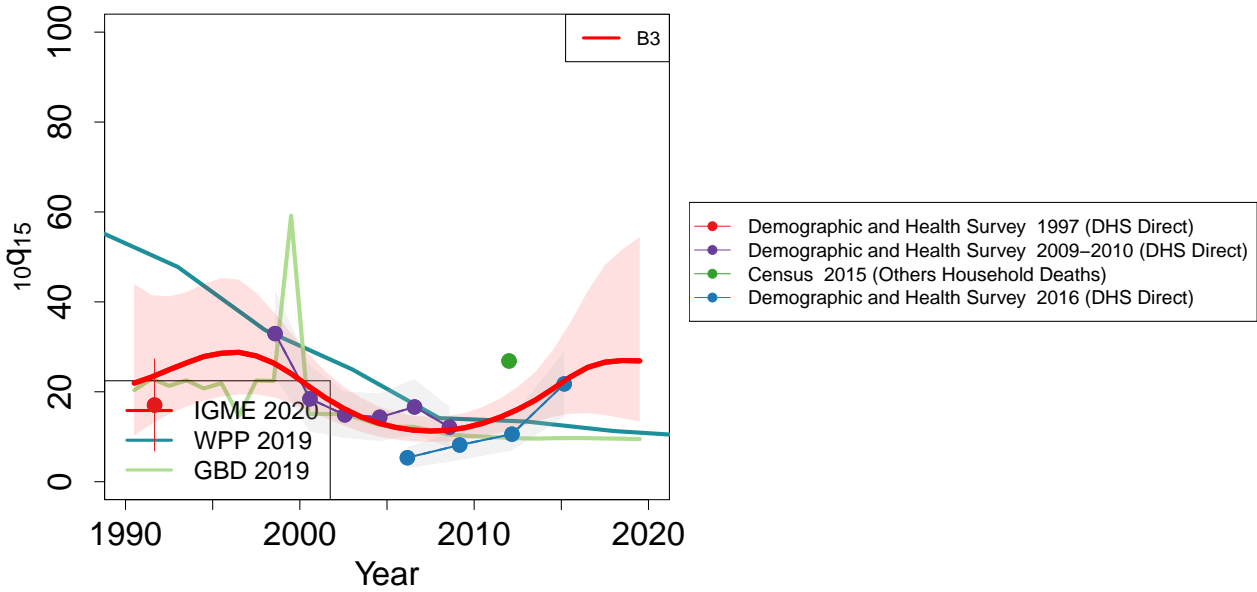

## Togo

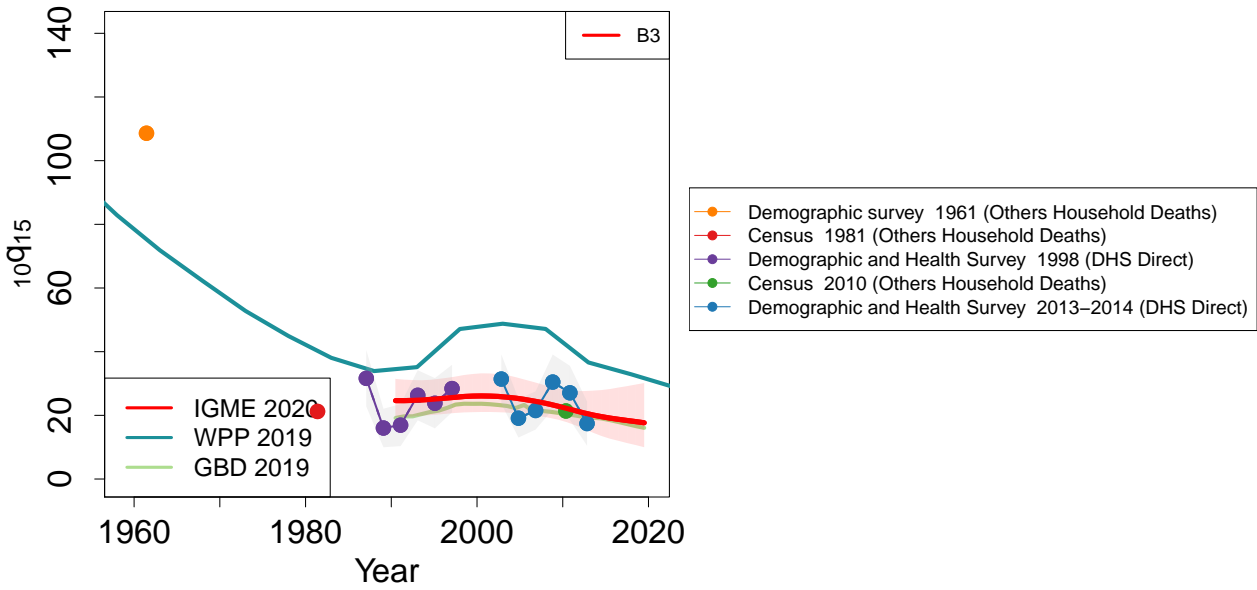

## Tonga

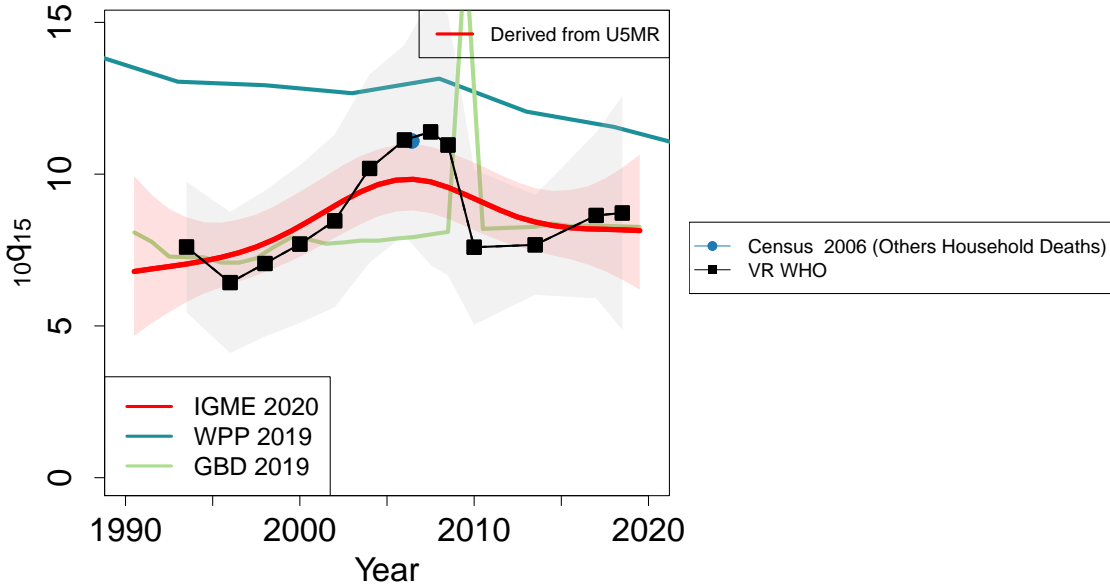

## Trinidad & Tobago

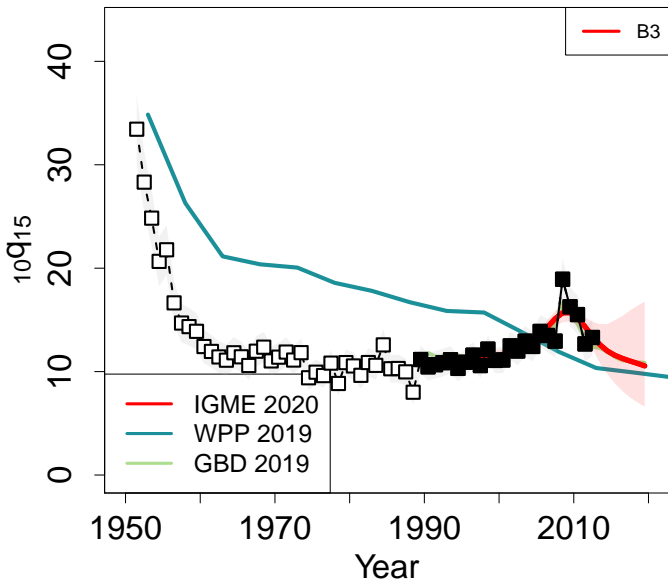



### Tunisia

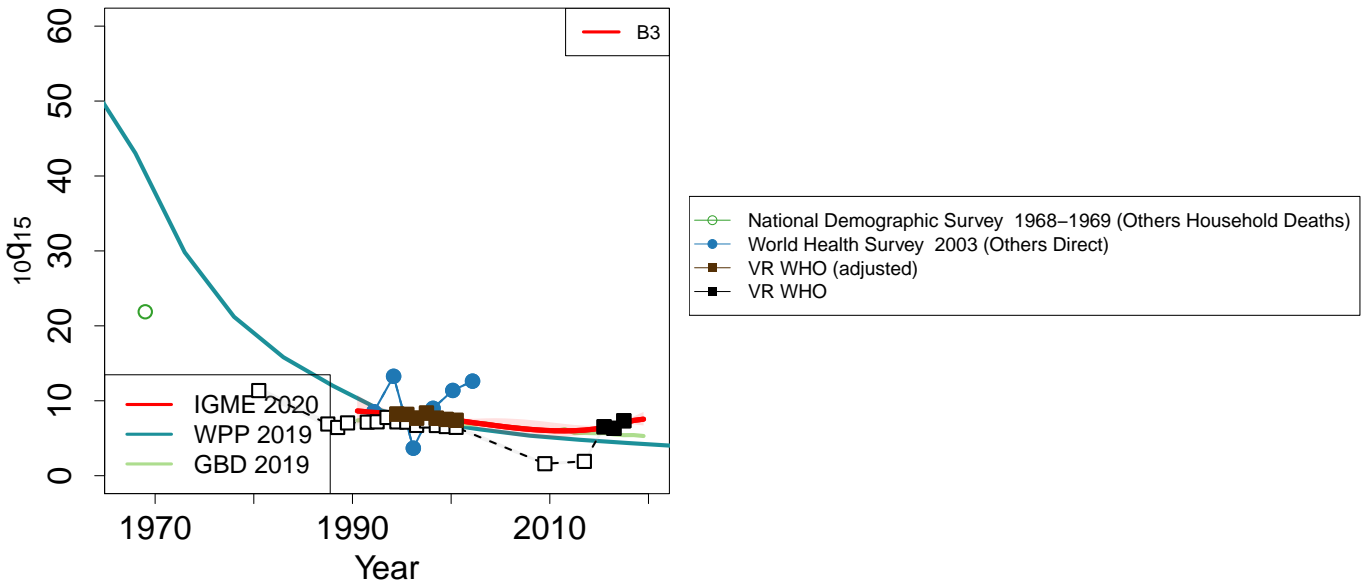

### Turkey

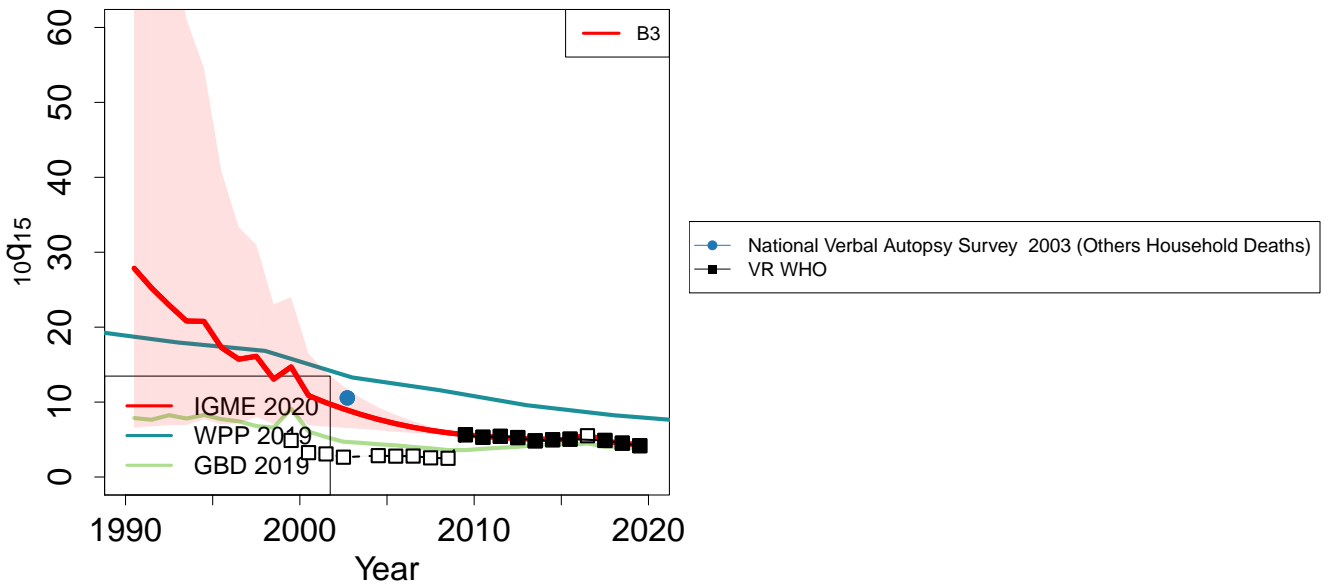

### Turkmenistan

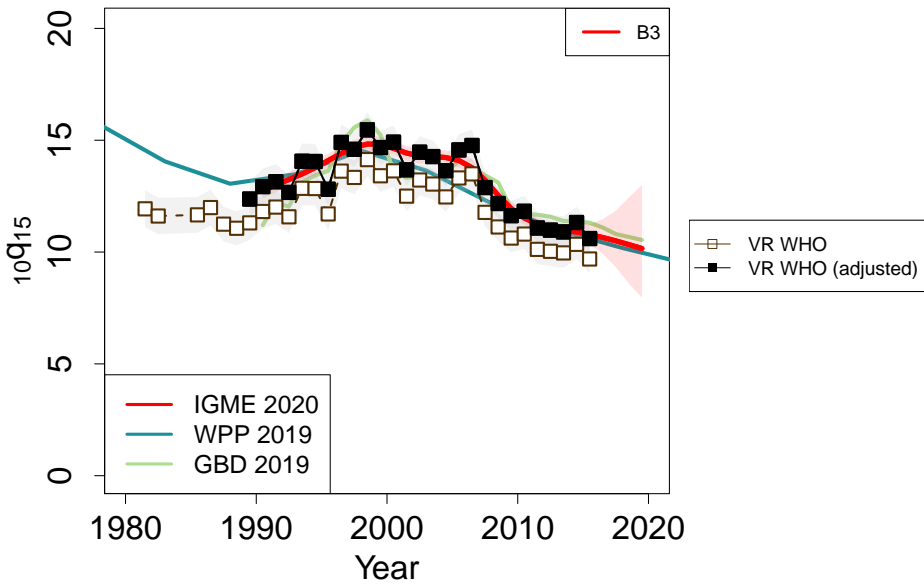

### Tuvalu

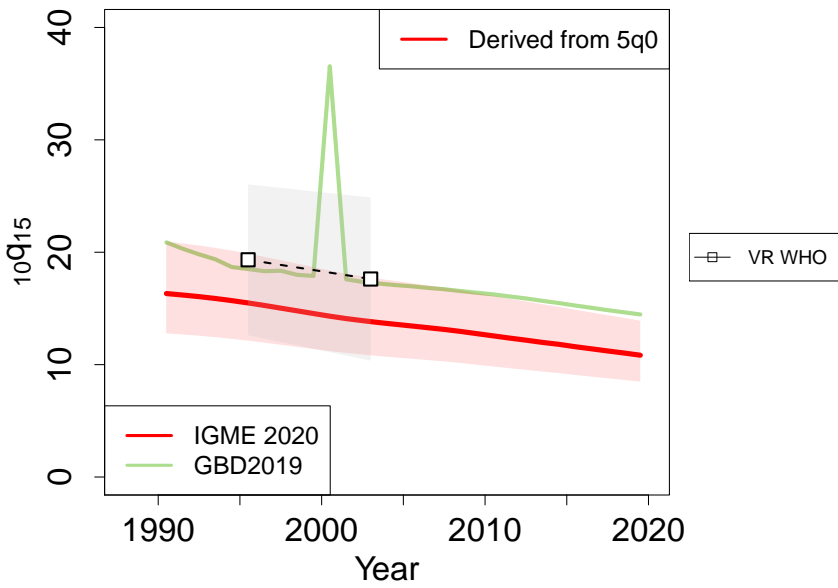

## Uganda

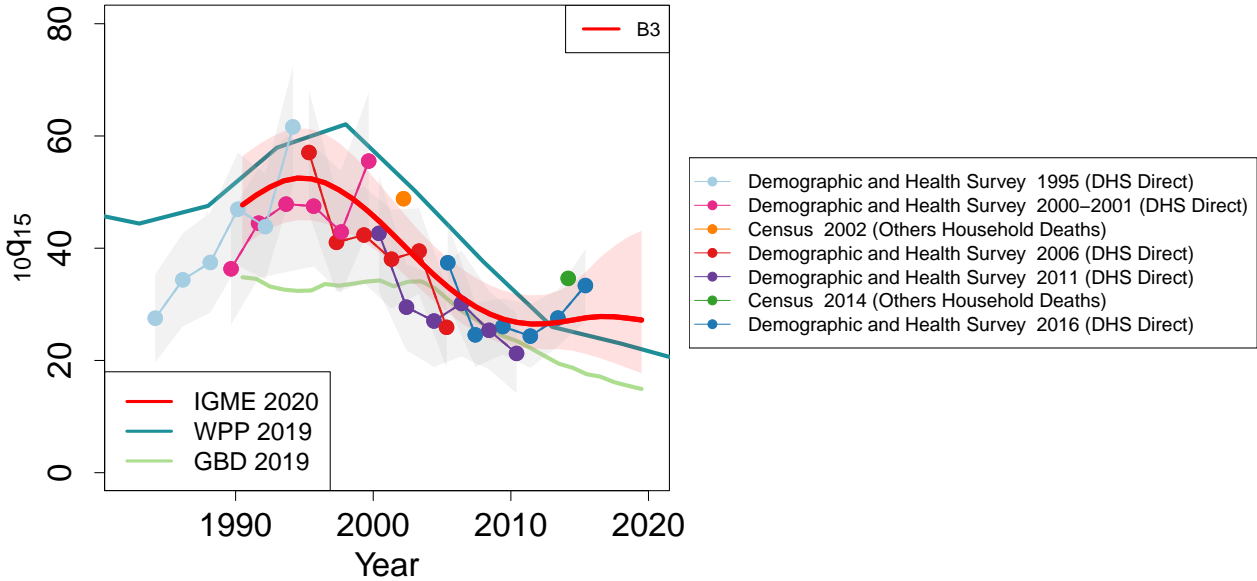

## Ukraine

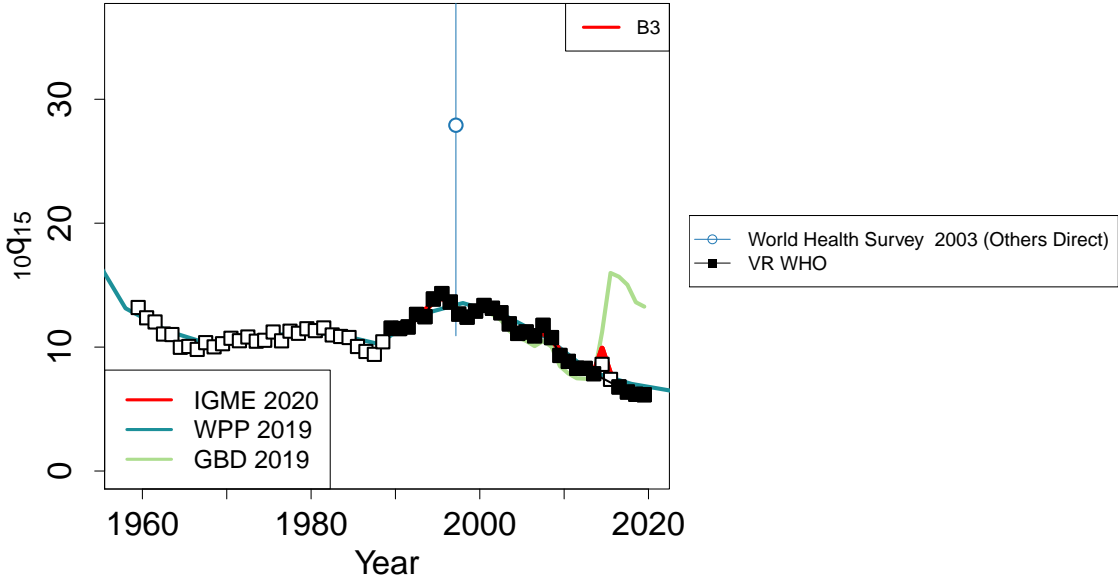

## United Arab Emirates

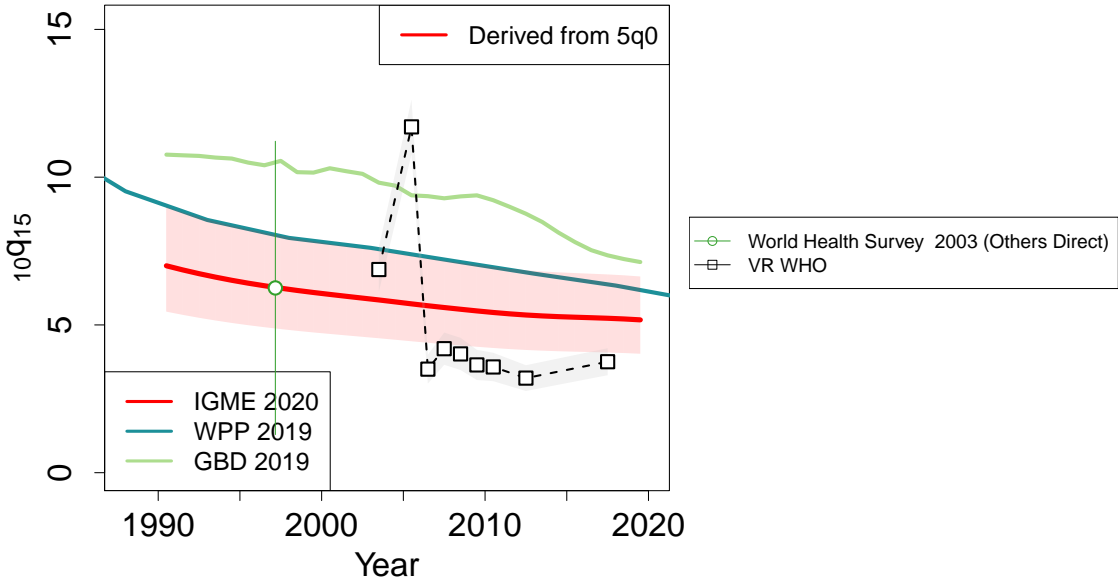

## United Kingdom

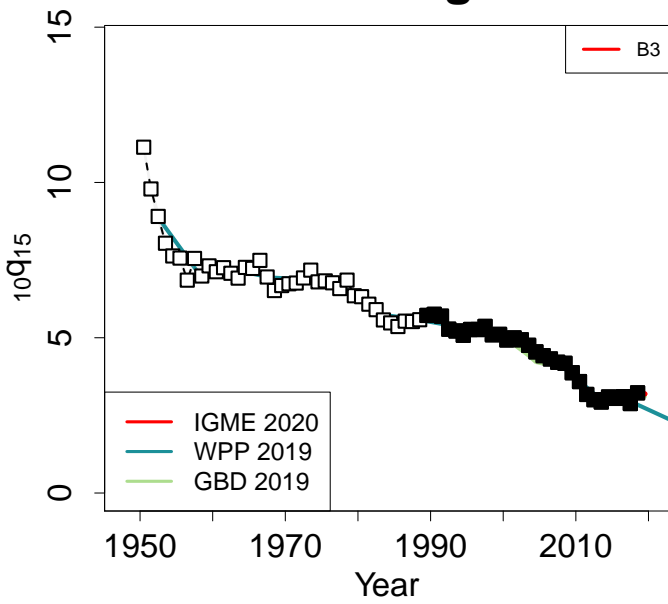

## United States of America

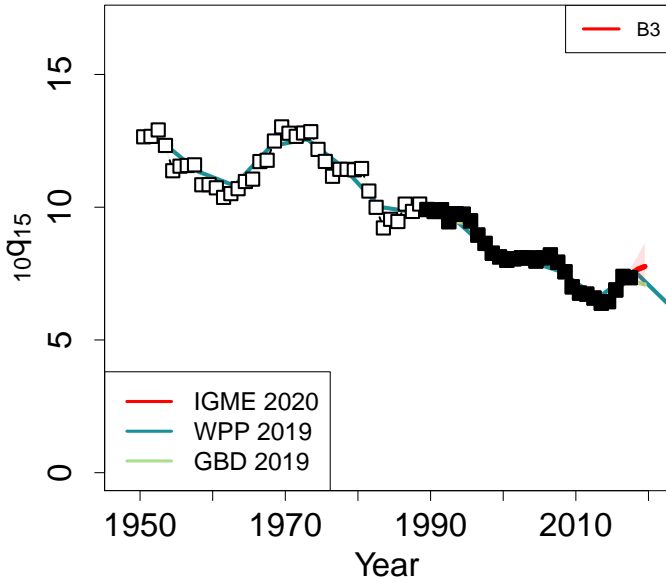

## Uruguay

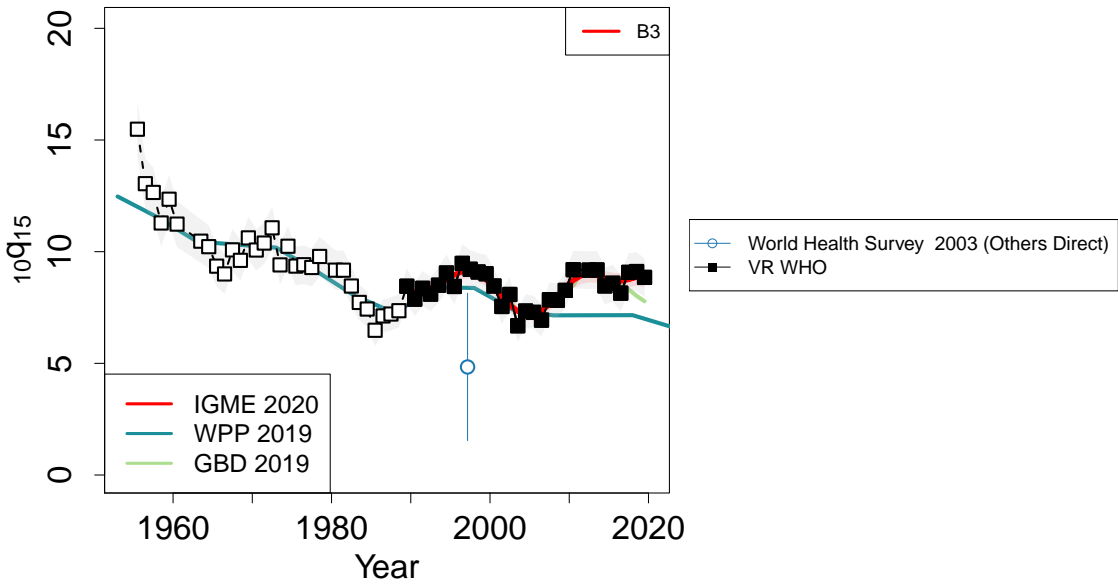

## Uzbekistan

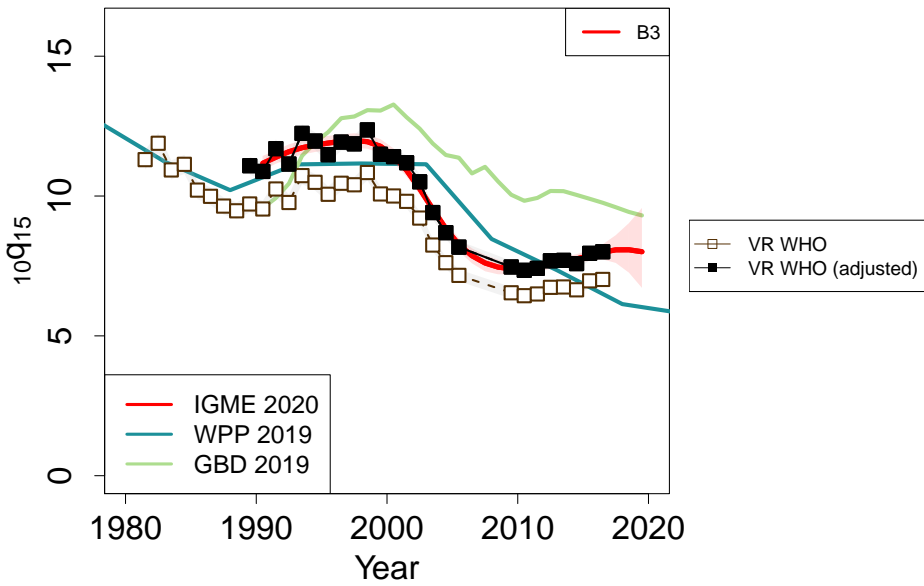

## Vanuatu

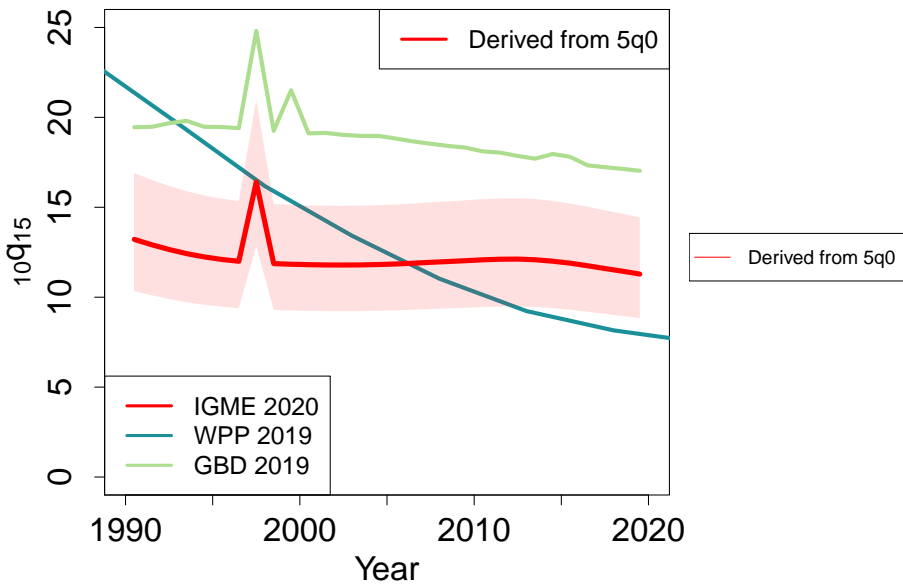

## Venezuela

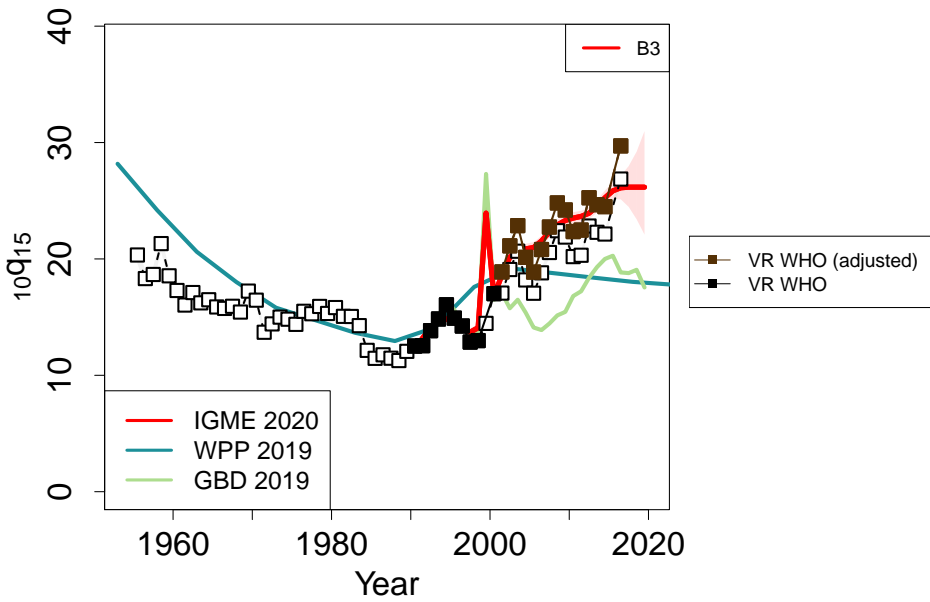

## Vietnam

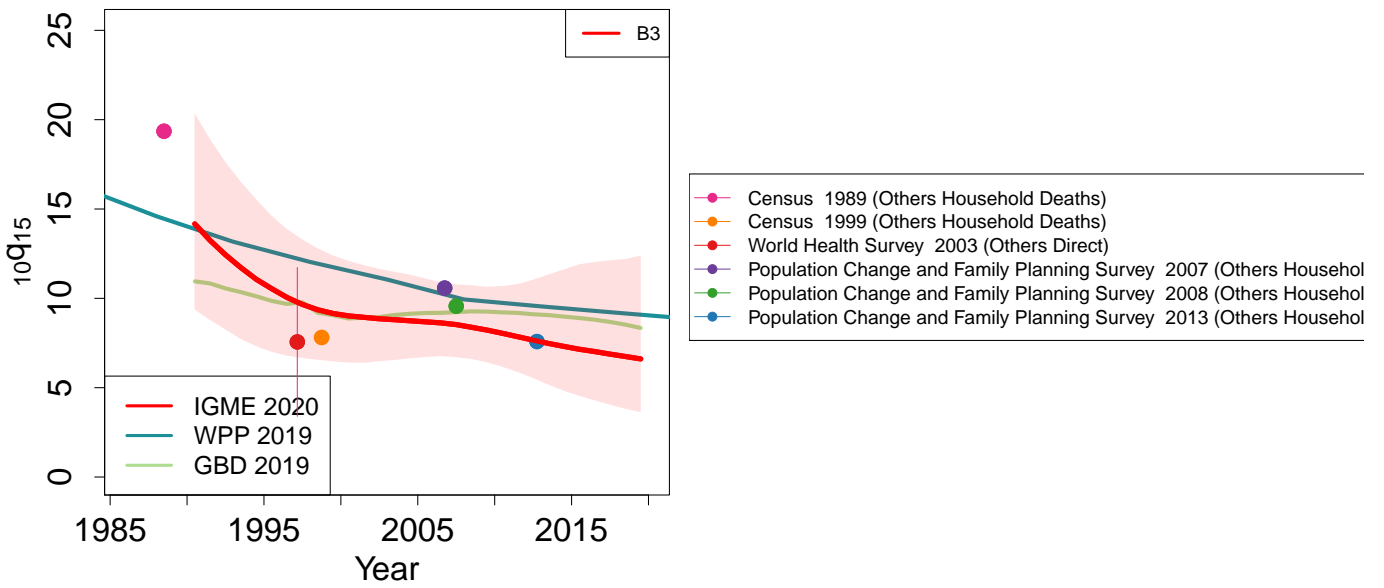

## Yemen

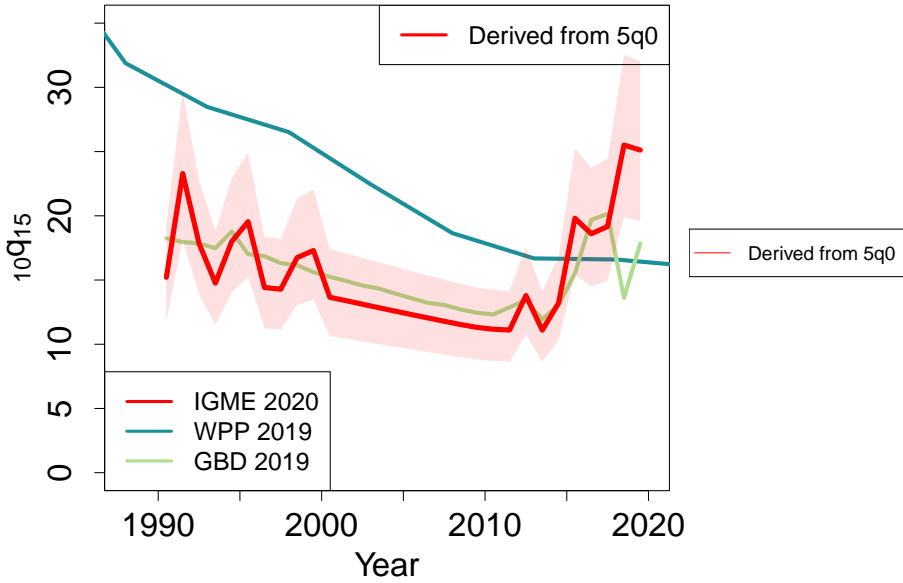

## Zambia

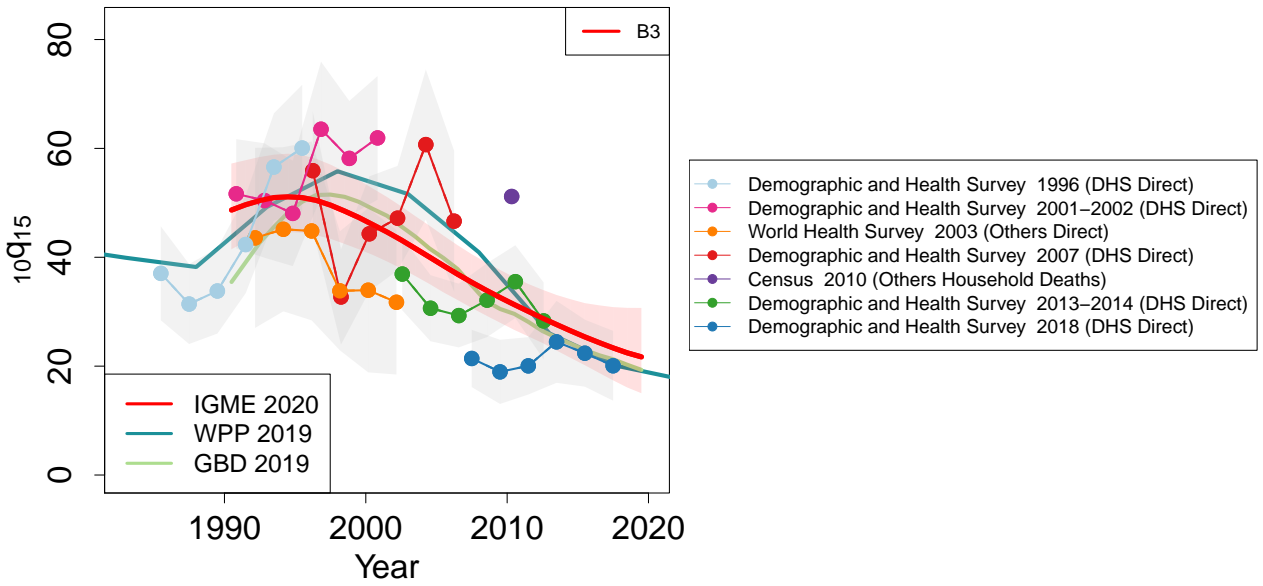



# Zimbabwe

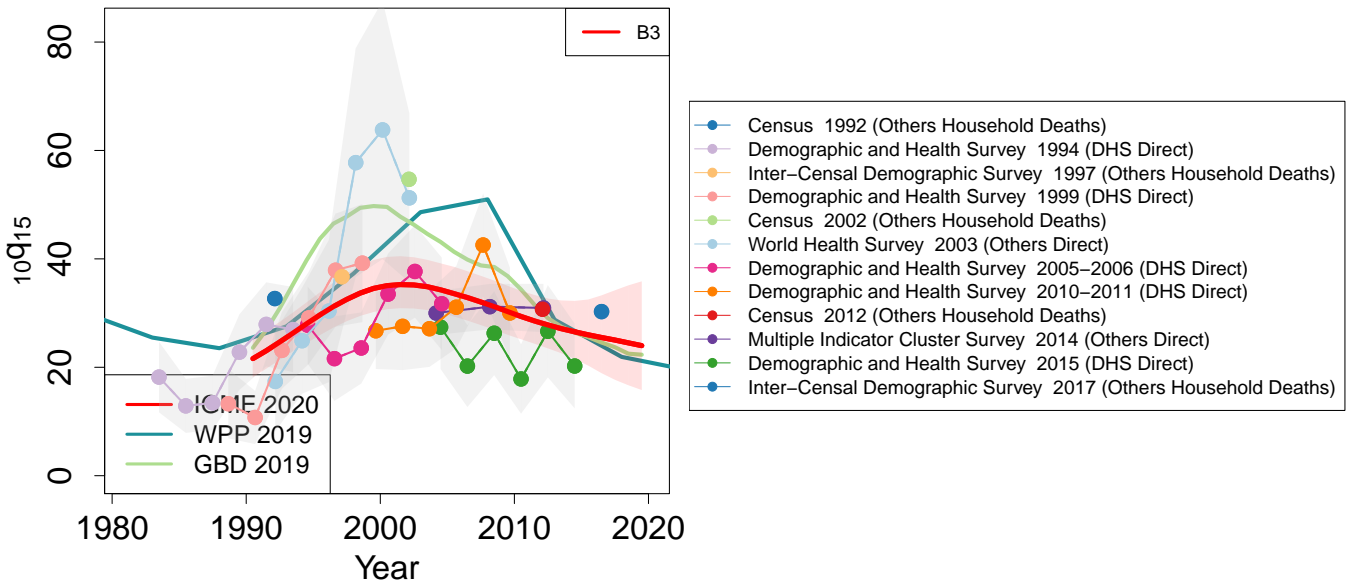

## 6 COMPARISON WITH ESTIMATES FROM MODEL LIFE TABLES, THE WORLD POPULATION PROSPECTS 2019 AND THE GLOBAL BURDEN OF DISEASE 2019

This section briefly compares the 2020 IGME estimates with those that could be obtained by indexing model life tables solely on U5MR, and those of the World Population Prospects 2019 and the Global Burden of Disease 2019. The country-specific plots presented in the previous section also display the estimates from the WPP and GBD.

In countries where the B3 model was used, the median  $_{10}q_{15}$ -to- $_{5}q_0$  ratio was 0.56 in 2019, increasing from 0.35 in 1990. In 25 countries, this ratio had already exceeded 1 in 2019 (7 in 1990). Figure S5 depicts the  $_{10}q_{15}$ -to- $_{5}q_0$  ratio estimated from the log-quadratic model based on high-quality vital registration and HDSS data and the ratio encompassed in two standard model life tables; the North and South models of Coale-Demeny life tables. While the B3 estimates conform well to the predictions of the log-quadratic model, they deviate substantially from the standard life tables. This suggests that youth mortality should be inferred from child mortality only as a last resort, and that caution should be exercised when using the traditional model life tables, especially in low-mortality countries.

As indicated in the main text, our estimates contrast with those of the World Population Prospects (WPP) 2019 or the Global Burden of Disease (GBD) 2019 Study. The difference between the latest GBD estimate of the probability  $_{10}q_{15}$  and our estimate was more than 20% in 95 countries in 2019. The difference was more than 20% in 74 countries when comparing our study with the WPP, and more than 20% in 100 countries when comparing the GBD with the WPP.

To summarize these deviations by region, Table S12 presents the numbers of deaths for the year 2019 in this study against the GBD and WPP estimates. We use here the GBD regional classification to present the uncertainty intervals around GBD values (these are 95% uncertainty intervals). Globally, our estimates fall between the two other series: the number of deaths among 15-24-year-olds in the GBD survey is 12% lower than the estimate from this study, and the WPP estimate is 13% higher than ours. In 6 regions, the absolute differences are greater than 10,000 annual deaths between at least two series: North Africa and Middle East, Southeast Asia, South Asia, Western Sub-Saharan Africa, Eastern Sub-Saharan Africa and Central Sub-Saharan Africa. In North Africa and the Middle East, the total number of deaths in the GBD and WPP are respectively 31% and 18% lower than ours. In South-East Asia, the IGME and WPP estimates are consistent and lower than the WPP, while in South Asia, our estimates are lower than the other two series. But the most striking discrepancies are in sub-Saharan Africa. In West Africa, the WPP estimates of deaths among 15-24-year-olds are almost three times higher than those of the GBD survey, and in Central Africa, almost twice as high. Differences between estimates of adult mortality between the ages of 15 and 59 and maternal mortality in Africa have already been much debated [41], and this debate resonates here. Our estimates are consistently higher than the GBD values, while the consistency with WPP estimates varies

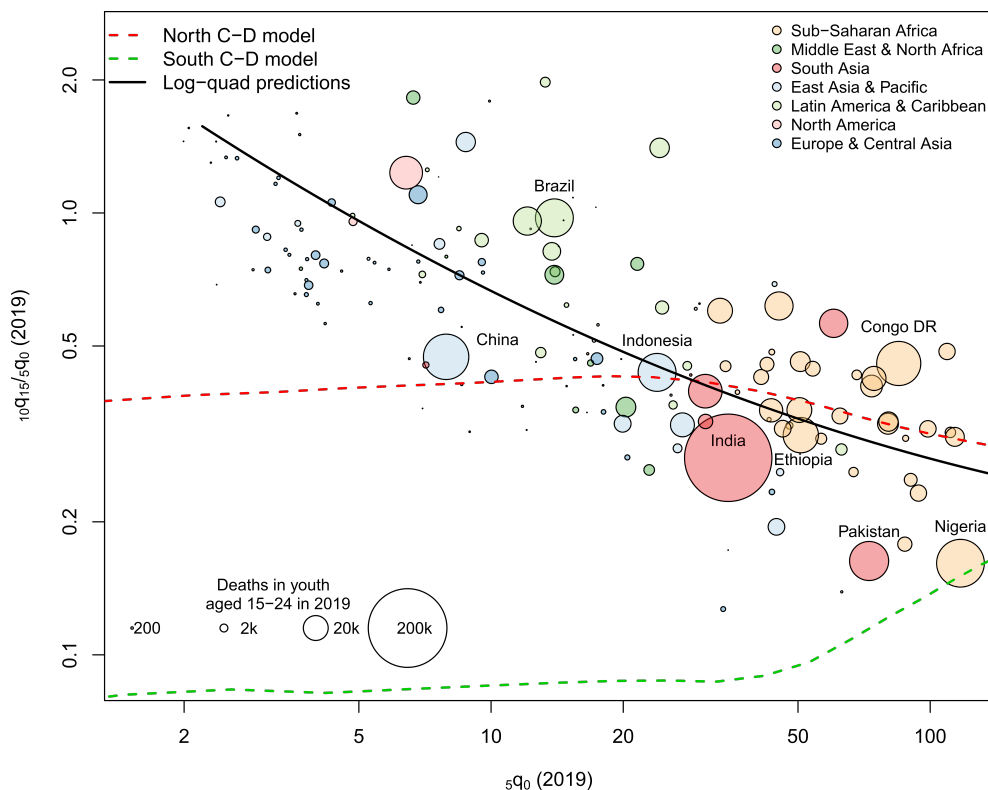

Figure S5 – Ratio of the probability  $_{10}q_{15}$  to the probability  $_{5}q_0$  in 2019, according to the level of under-five mortality, in B3 estimates, the log-quadratic predictions and the North and South models of Coale-Demeny (C-D) life tables. Countries for which  $_{10}q_{15}$  was inferred from  $_{5}q_0$  are excluded.

across sub-regions. It is difficult to make sense of these variations, which are due both to adjustments introduced to account for biases in sibling histories and to differences in the methods for reconstructing mortality trends. Deviations in the population at risk of dying do not play a large role here (the GBD estimate of the population aged 15-24 in Sub-Saharan Africa in 2019 was 3% higher than the WPP estimate). Given the increasing concentration of deaths in Sub-Saharan Africa, more research is warranted to disentangle the main drivers of deviations between mortality estimates.

|                           | Adolescents<br>aged 15-19 |             |                  | Young people<br>aged 20-24 |             |                  |
|---------------------------|---------------------------|-------------|------------------|----------------------------|-------------|------------------|
|                           | GBD<br>2019               | WPP<br>2019 | IGME<br>2020     | GBD<br>2019                | WPP<br>2019 | IGME<br>2020     |
| World                     | 499<br>(465-536)          | 663         | 595<br>(569-638) | 692<br>(645-738)           | 857         | 756<br>(695-893) |
| High-income North America | 12<br>(12-12)             | 11          | 12<br>(11-13)    | 21<br>(21-21)              | 23          | 24<br>(21-28)    |
| Australasia               | 1<br>(1-1)                | 1           | 1<br>(1-1)       | 1<br>(1-1)                 | 1           | 1<br>(1-1)       |
| High-income Asia Pacific  | 2                         | 2           | 2                | 3                          | 3           | 3                |

|                              | Adolescents<br>aged 15-19 |             |                 | Young people<br>aged 20-24 |             |                 |
|------------------------------|---------------------------|-------------|-----------------|----------------------------|-------------|-----------------|
|                              | GBD<br>2019               | WPP<br>2019 | IGME<br>2020    | GBD<br>2019                | WPP<br>2019 | IGME<br>2020    |
| Western Europe               | (2-2)<br>5                | 5           | (2-2)<br>5      | (3-3)<br>9                 | 8           | (3-3)<br>8      |
| Southern Latin America       | (5-6)<br>3                | 3           | (5-5)<br>3      | (9-9)<br>4                 | 5           | (8-9)<br>5      |
| Eastern Europe               | (3-3)<br>7                | 6           | (3-3)<br>5      | (4-5)<br>13                | 11          | (4-5)<br>9      |
| Central Europe               | (6-8)<br>2                | 2           | (5-5)<br>2      | (12-15)<br>3               | 3           | (8-9)<br>3      |
| Central Asia                 | (2-2)<br>5                | 4           | (2-2)<br>4      | (3-4)<br>8                 | 6           | (3-3)<br>6      |
| Central Latin America        | (4-5)<br>20               | 21          | (4-4)<br>25     | (7-9)<br>31                | 35          | (5-7)<br>36     |
| Andean Latin America         | (17-23)<br>4              | 5           | (24-25)<br>3    | (27-36)<br>6               | 8           | (33-39)<br>6    |
| Caribbean                    | (3-4)<br>3                | 5           | (3-4)<br>3      | (5-7)<br>5                 | 6           | (3-10)<br>5     |
| Tropical Latin America       | (3-4)<br>18               | 18          | (2-4)<br>20     | (4-6)<br>27                | 29          | (3-8)<br>28     |
| East Asia                    | (17-19)<br>29             | 30          | (18-21)<br>24   | (26-28)<br>49              | 45          | (24-33)<br>46   |
| Southeast Asia               | (25-33)<br>44             | 55          | (17-31)<br>46   | (42-56)<br>61              | 71          | (24-84)<br>60   |
| Oceania                      | (40-49)<br>2              | 2           | (38-56)<br>1    | (54-68)<br>2               | 2           | (39-94)<br>2    |
| North Africa and Middle East | (1-2)<br>38               | 46          | (1-2)<br>58     | (2-3)<br>51                | 60          | (1-2)<br>71     |
| South Asia                   | (34-44)<br>155            | 153         | (53-64)<br>149  | (45-59)<br>219             | 206         | (58-91)<br>194  |
| Southern Sub-Saharan Africa  | (142-168)<br>11           | 10          | (129-172)<br>12 | (198-242)<br>20            | 17          | (132-270)<br>19 |
| Western Sub-Saharan Africa   | (10-13)<br>58             | 169         | (11-13)<br>92   | (18-23)<br>66              | 181         | (15-24)<br>100  |
| Eastern Sub-Saharan Africa   | (50-68)<br>62             | 81          | (80-110)<br>84  | (56-77)<br>70              | 97          | (74-129)<br>103 |
| Central Sub-Saharan Africa   | (53-72)<br>19             | 35          | (74-99)<br>44   | (61-80)<br>24              | 40          | (76-136)<br>45  |
|                              | (16-22)                   |             | (32-61)         | (19-27)                    |             | (22-85)         |

Table S12 – Comparison of numbers of deaths (in thousands) by GBD regions, GBD 2019, WPP 2019, and estimates derived from the B3 model for the year 2019.

Note: the uncertainty intervals around the IGME estimates are 90% UIs, while the uncertainty intervals around the GBD estimates are 95% UIs.

## 7 UNICEF REGIONAL CLASSIFICATION

Countries included in this study are classified in geographical regions according to the UNICEF classification (Figure S6). Aggregated estimates based on other regional classifications (SDG, WHO, etc.) are available at [www.childmortality.org](http://www.childmortality.org).

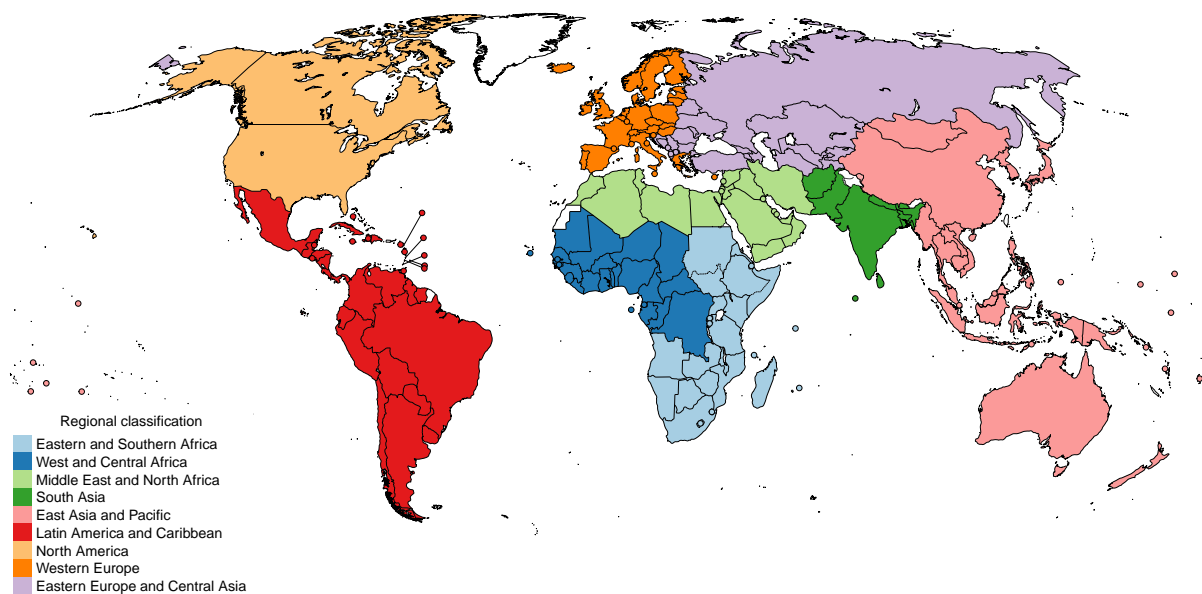

Figure S6 – *UNICEF Regional classification*

## 8 UNITED NATIONS INTER-AGENCY GROUP FOR CHILD MORTALITY ESTIMATION

The UN IGME is led and coordinated by the United Nations Children’s Fund (UNICEF) and comprises the WHO, the UN Population Division and the World Bank Group. It was formed in 2004 to share data on child mortality, harmonize estimates within the UN system, improve methods for child mortality estimation, report on progress towards child survival goals and enhance country capacity to produce timely and properly assessed estimates of child mortality. The organizations and individuals involved in generating the 2020 estimates of mortality in children, adolescents and youth are the following:

- *United Nations Children’s Fund*: Lucia Hug, Sinae Lee, Yang Liu, Anupam Mishra, David Sharrow, Danzhen You
- *World Health Organization*: Bochen Cao, Jessica Ho, Kathleen Louise Strong
- *World Bank Group*: Emi Suzuki
- *United Nations, Department of Economic and Social Affairs, Population Division*: Kirill Andreev, Lina Bassarsky, Victor Gaigbe-Togbe, Patrick Gerland, Danan Gu, Sara Hertog, Nan Li, Thomas Spoorenberg, Philipp Ueffing, Mark Wheldon
- *United Nations Economic Commission for Latin America and the Caribbean, Population Division*: Guiomar Bay, Helena Cruz Castanheira

The UN IGME’s Technical Advisory Group provides guidance on estimation methods, technical issues and strategies for data analysis and data quality assessment. Its members are Leontine Alkema (University of Massachusetts, Amherst), Robert Black (Johns Hopkins University), Simon Cousens (London School of Hygiene and Tropical Medicine), Trevor Croft (The Demographic and Health Surveys Program, ICF), Michel Guillot (University of Pennsylvania and French Institute for Demographic Studies), Kenneth Hill (Stanton-Hill Research), Bruno Masquelier (University of Louvain), Colin Mathers (University of Edinburgh), Jon Pedersen (Mikro!), Jon Wakefield (University of Washington) and Neff Walker (Johns Hopkins University).

## REFERENCES

- [1] T. Moultrie, R. Dorrington, A. Hill, K. Hill, I. Timæus, and B. Zaba, *Tools for demographic estimation*. Paris: International Union for the Scientific Study of Population, 2013.
- [2] K. Hill, “Estimating Census and Death Registration Completeness,” *Asian and Pacific Population Forum*, vol. 1(3), pp. 8–13, 1987.
- [3] N. Bennett and S. Horiuchi, “Mortality estimation from registered deaths in less developed countries,” *Demography*, vol. 21(2), pp. 217–234, 1984.
- [4] K. Hill, D. You, and Y. Choi, “Death distribution methods for estimating adult mortality: Sensitivity analysis with simulated data error,” *Demographic Research*, vol. 21, pp. 235–254, 2009.
- [5] C. Murray, J. Rajaratnam, J. Marcus, T. Laakso, and A. Lopez, “What Can We Conclude from Death Registration? Improved Methods for Evaluating Completeness,” *PLoS Med*, vol. 7, p. e1000262, 04 2010.
- [6] T. Riffe, E. Lima, and B. Queiroz, *DDM: Death Registration Coverage Estimation*, 2017. R package version 1.0-0.
- [7] World Health Organization, *Neonatal and Perinatal Mortality: Country, Regional and Global Estimates*. World Health Organization, 2006.
- [8] D. Dicker *et al.*, “Global, regional, and national age-sex-specific mortality and life expectancy, 1950-2017: a systematic analysis for the global burden of disease study 2017,” *The Lancet*, vol. 392, pp. 1684–1735, Nov. 2018.
- [9] K. Hill, *Analytical methods to evaluate the completeness and quality of death registration: Current state of knowledge*, 2017.
- [10] L. I. Lin, “A concordance correlation coefficient to evaluate reproducibility,” *Biometrics*, vol. 45, pp. 255–268, Mar 1989.
- [11] C. Rao and K. Matthew, “Overview of the principles and international experiences in implementing record linkage mechanisms to assess completeness of death registration.” Population Division Technical Paper, No 2017/5, 2017.
- [12] N. Li and P. Gerland, “Evaluating the completeness of death registration at old ages: A new method and its application to developed and developing countries.” Population Division Technical Paper No. 2019/5, 2019.
- [13] K. Hill, Y. Choi, and I. Timæus, “Unconventional approaches to mortality estimation,” *Demographic research*, vol. 13(12), pp. 281–300, 2005.
- [14] R. Özdemir, C. Rao, Z. Öcek, and G. D. Horasan, “Reliable mortality statistics for turkey: Are we there yet?,” *BMC Public Health*, vol. 15, June 2015.

- [15] United Nations, *World Population Prospects: The 2019 Revision*. UN, 2019.
- [16] J. Pedersen and J. Liu, “Child mortality estimation: appropriate time periods for child mortality estimates from full birth histories,” *PLoS Med.*, vol. 9, no. 8, p. e1001289, 2012.
- [17] E. Gakidou and G. King, “Death by survey: estimating adult mortality without selection bias from sibling survival data,” *Demography*, vol. 43 (3), pp. 569–585, 2006.
- [18] B. Masquelier, “Adult Mortality from Sibling Survival Data: A Reappraisal of Selection Biases,” *Demography*, vol. Volume 50, Issue 1, pp. 207–228, 2013.
- [19] G. Rodriguez and J. Trussell, “Maximum likelihood estimation of the parameters of Coale’s model nuptiality schedule from survey data.” *World Fertility Survey, Technical Bulletins*, No 7, 1980.
- [20] S. Helleringer, G. Pison, M. Kanté, G. Duthé, and A. Andro, “Reporting errors in survey data on adult mortality: results from a record linkage study in Senegal,” *Demography*, vol. 51, no. 2, pp. 387–411, 2014.
- [21] S. Helleringer, G. Pison, B. Masquelier, A. Kanté, L. Douillot, G. Duthé, C. Sokhna, and V. Delaunay, “Improving the quality of adult mortality data collected in demographic surveys: Validation study of a new siblings’ survival questionnaire in niakhar, senegal,” *PLoS Med*, vol. 11, p. e1001652, 05 2014.
- [22] G. Reniers, B. Masquelier, and P. Gerland, “Adult Mortality in Africa,” in *International Handbook of Adult Mortality* (R. Rogers and E. Crimmins, eds.), Springer, 2011.
- [23] B. Masquelier, J. W. Eaton, P. Gerland, F. Pelletier, and K. K. Mutai, “Age patterns and sex ratios of adult mortality in countries with high hiv prevalence,” *AIDS*, vol. 31 Suppl 1, pp. S77–S85, Apr 2017.
- [24] Z. Obermeyer, J. Rajaratnam, C. Park, E. Gakidou, M. Hogan, A. Lopez, and C. Murray, “Measuring Adult Mortality Using Sibling Survival: A New Analytical Method and New Results for 44 Countries, 1974-2006,” *PLoS Medicine*, vol. 7, p. e1000260, 04 2010.
- [25] I. Timæus and M. Jasseh, “Adult mortality in Sub-Saharan Africa: evidence from demographic and health survey,” *Demography*, vol. 41, 4, pp. 757–772, 2004.
- [26] C. Stanton, A. Nouredine, and K. Hill, “DHS Maternal Mortality Indicators: an assessment of data quality and implications for Data Use,” *Studies in Family planning*, vol. 31,2, pp. 111–123, 2000.
- [27] B. Masquelier, “Sibship Sizes and Family Sizes in Survey Data Used to Estimate Mortality,” *Population-E*, vol. 69, no. 2, pp. 249–268, 2014.



- [28] M. Barbieri, J. R. Wilmoth, V. M. Shkolnikov, D. Gleijer, D. Jasilionis, D. Jdanov, C. Boe, T. Riffe, P. Grigoriev, and C. Winant, “Data resource profile: The human mortality database (HMD),” *International Journal of Epidemiology*, vol. 44, pp. 1549–1556, June 2015.
- [29] J. Banister and K. Hill, “Mortality in China 1964-2000,” *Popul Stud (Camb)*, vol. 58, no. 1, pp. 55–75, 2004.
- [30] R. Dorrington, “The generalized growth balance method,” in *Tools for demographic estimation* (T. Moultrie, R. Dorrington, A. Hill, K. Hill, I. Timæus, and B. Zaba, eds.), Paris: International Union for the Scientific Study of Population, 2013.
- [31] L. Alkema and J. R. New, “Global estimation of child mortality using a bayesian b-spline bias-reduction model,” *The Annals of Applied Statistics*, vol. 8, no. 4, pp. 2122–2149, 2014.
- [32] P. H. C. Eilers and B. D. Marx, “Flexible smoothing with b -splines and penalties,” *Statist. Sci.*, vol. 11, pp. 89–121, 05 1996.
- [33] P. H. C. Eilers and B. D. Marx, “Splines, knots, and penalties,” *Wiley Interdisciplinary Reviews: Computational Statistics*, vol. 2, no. 6, pp. 637–653, 2010.
- [34] I. D. Currie and M. Durban, “Flexible smoothing with p-splines: a unified approach,” *Statistical Modelling*, vol. 2, no. 4, pp. 333–349, 2002.
- [35] Department of Peace and Conflict Research, Uppsala University, “Uppsala Conflict Data Program.” Available at <https://ucdp.uu.se/>.
- [36] WHO, “WHO methods and data sources for life tables 1990-2016.” Global Health Estimates Technical Paper WHO/HIS/IER/GHE/2018.2, available at <https://www.who.int/healthinfo/statistics/en/>, 2018.
- [37] C. Raleigh, A. Linke, H. Hegre, and J. Karlsen, “Introducing ACLED: An armed conflict location and event dataset,” *Journal of Peace Research*, vol. 47, pp. 651–660, Sept. 2010.
- [38] ACLED, “Armed conflict location and event data project.” Available at <https://acleddata.com>.
- [39] Centre for Research on the Epidemiology of Disasters, “EM-DAT: The International Disaster Database.” Available at <https://www.emdat.be/>.
- [40] A. Gelman and J. Hill, *Data analysis using regression and multilevel/Hierarchical models*. Cambridge University Press, 2007.
- [41] N. J. Kassebaum, A. D. Lopez, C. J. L. Murray, and R. Lozano, “A comparison of maternal mortality estimates from GBD 2013 and WHO,” *The Lancet*, vol. 384, pp. 2209–2210, Dec. 2014.
